# Supplementary material
Source: MDPI journal article supplement (https://www.mdpi.com/2673-4087/1/1/4)
Supplement: s1 [file s1]

## Sheet: correlation
		W. J. Evans							H. J. Hancock							M. Tyner
		1	2	3	4	5	6	7	1	2	3	4	5	6	7	1	2	3	4	5	6	7			W. J. Evans
W. J. Evans	1	1	.8**	.8**	.9**	.7**	.9**	.8**	-0.2	0.5	.8**	.8**	0.2	.7*	.9**	0.4	0.4	0.1	0.2	0	.6*	0.4			1	Autumn Leaves
	2	.8**	1	.7**	.9**	.7**	.7**	.8**	0	.6*	.9**	.8**	0.2	.7**	.8**	0.4	.6*	0.3	0.4	0.1	.7**	0.5			2	Israel
	3	.8**	.7**	1	.7**	.8**	.7**	.6*	0.1	0.2	.6*	.5*	0.3	0.5	.7**	.6*	0.4	0.3	0.3	0.1	.7**	.6*			3	I Love You Porgy
	4	.9**	.9**	.7**	1	.7**	.8**	.8**	0	.6*	.8**	.8**	0.2	.7**	.8**	0.3	0.5	0.2	0.3	0	.6*	0.5			4	Stella by Starlight
	5	.7**	.7**	.8**	.7**	1	.7**	.7**	0.2	0.2	.6*	.6*	0.5	.7**	.8**	.6*	0.4	0.5	0.5	0.2	.7**	.7**			5	Who Can I Turn To?
	6	.9**	.7**	.7**	.8**	.7**	1	.9**	-0.2	0.3	.7**	.6*	0.1	.7**	.9**	0.3	0.2	0	0.2	-0.1	0.5	0.4			6	Someday My Prince Will Come
	7	.8**	.8**	.6*	.8**	.7**	.9**	1	-0.2	0.5	.8**	.6*	0.3	.8**	.8**	0.3	0.3	0.1	0.2	0	.6*	0.4			7	A Time for Love
H. J. Hancock	1	-0.2	0	0.1	0	0.2	-0.2	-0.2	1	0	0	0	.7**	-0.1	-0.1	0.3	.6*	.8**	.6*	.8**	0.3	.6*
	2	0.5	.6*	0.2	.6*	0.2	0.3	0.5	0	1	.7**	.7**	0.1	0.3	0.5	0	0.5	0.2	0.1	0.1	0.2	0.1			H. J. Hancock
	3	.8**	.9**	.6*	.8**	.6*	.7**	.8**	0	.7**	1	.7*	0.3	.6*	.7**	.6*	.6*	0.4	0.5	0.2	.8**	.6*			1	Cantaloupe Island
	4	.8**	.8**	.5*	.8**	.6*	.6*	.6*	0	.7**	.7*	1	0.2	.6*	.8**	0.1	.5*	0.3	0.2	0	0.4	0.4			2	Maiden Voyage
	5	0.2	0.2	0.3	0.2	0.5	0.1	0.3	.7**	0.1	0.3	0.2	1	0.3	0.2	0.5	.7**	.8**	.8**	.6*	.5*	.8**			3	Someday My Prince Will Come
	6	.7*	.7**	0.5	.7**	.7**	.7**	.8**	-0.1	0.3	.6*	.6*	0.3	1	.7**	0.3	0.3	0.2	0.3	0	0.5	0.5			4	Dolphin Dance
	7	.9**	.8**	.7**	.8**	.8**	.9**	.8**	-0.1	0.5	.7**	.8**	0.2	.7**	1	0.3	0.4	0.2	0.3	0	0.5	0.5			5	Thieves in the Temple
M. Tyner	1	0.4	0.4	.6*	0.3	.6*	0.3	0.3	0.3	0	.6*	0.1	0.5	0.3	0.3	1	0.5	.6*	.7**	0.5	.9**	.7**			6	Cottontail
	2	0.4	.6*	0.4	0.5	0.4	0.2	0.3	.6*	0.5	.6*	.5*	.7**	0.3	0.4	0.5	1	.8**	.7**	.6*	.7*	.7**			7	The Sorcerer
	3	0.1	0.3	0.3	0.2	0.5	0	0.1	.8**	0.2	0.4	0.3	.8**	0.2	0.2	.6*	.8**	1	.8**	.9**	.6*	.8**
	4	0.2	0.4	0.3	0.3	0.5	0.2	0.2	.6*	0.1	0.5	0.2	.8**	0.3	0.3	.7**	.7**	.8**	1	.7**	.7**	.9**			M. Tyner
	5	0	0.1	0.1	0	0.2	-0.1	0	.8**	0.1	0.2	0	.6*	0	0	0.5	.6*	.9**	.7**	1	0.5	.6*			1	Man from Tanganyika
	6	.6*	.7**	.7**	.6*	.7**	0.5	.6*	0.3	0.2	.8**	0.4	.5*	0.5	0.5	.9**	.7*	.6*	.7**	0.5	1	.8**			2	Folks
	7	0.4	0.5	.6*	0.5	.7**	0.4	0.4	.6*	0.1	.6*	0.4	.8**	0.5	0.5	.7**	.7**	.8**	.9**	.6*	.8**	1			3	You Stepped Out of a Dream
																									4	For Tomorrow
																									5	The Habana Sun
																									6	Autumn Leaves
																									7	Just in Time from Dimensions

## Sheet: 1st-order
	Evans_No1	Evans_No2	Evans_No3	Evans_No4	Evans_No5	Evans_No6	Evans_No7	Hancock_No1	Hancock_No2	Hancock_No3	Hancock_No4	Hancock_No5	Hancock_No6	Hancock_No7	Tyner_No1	Tyner_No2	Tyner_No3	Tyner_No4	Tyner_No5	Tyner_No6	Tyner_No7
0,0	0.0199693	0.0491071	0.0610687	0.0515152	0.040201	0.00878477	0.00362976	0.159696	0.0532276	0.038674	0.0901526	0.0955882	0.0657596	0.0507937	0.0397878	0.147059	0.0979955	0.0816327	0.104061	0.0326797	0.0833333
0,1	0.195084	0.15625	0.13486	0.227273	0.113065	0.144949	0.125227	0.026616	0.0634202	0.0773481	0.14147	0.0110294	0.0975057	0.122222	0.0503979	0.0397059	0.0289532	0.0238095	0.0126904	0.0610022	0.0408163
0,-1	0.15361	0.14881	0.0712468	0.136364	0.0753769	0.241581	0.23049	0.026616	0.14949	0.0856354	0.20111	0.0330882	0.131519	0.147619	0.0424403	0.0485294	0.0512249	0.0510204	0.0329949	0.0501089	0.079932
0,10	0.0030722	0.00446429	0.00254453	0.0030303	0.0100503	0.0161054	0.00181488	0.00760456	0.0011325	0.00552486	0.00416089	0	0.00453515	0.0047619	0.0106101	0.00441176	0.00222717	0.00340136	0.00761421	0.00653595	0.0136054
0,-10	0.0030722	0.0014881	0.00254453	0.00606061	0.00251256	0.00292826	0	0	0.00226501	0.00276243	0.00138696	0.00367647	0	0.00634921	0	0.00147059	0	0.00680272	0.00507614	0.00217865	0.00340136
0,11	0.0030722	0.00595238	0	0	0.00251256	0.00439239	0.00181488	0	0.00339751	0.00276243	0	0	0.00226757	0.0142857	0.00265252	0.00147059	0.00222717	0	0	0	0.00170068
0,-11	0.0015361	0	0	0	0.00502513	0	0	0	0.0237826	0	0	0	0.00226757	0.00952381	0	0.00294118	0.00222717	0	0	0.00217865	0
0,12	0.0015361	0.0014881	0	0.0030303	0.00753769	0.00292826	0.00181488	0.00380228	0.0011325	0	0.0221914	0.00367647	0	0.00634921	0	0.00441176	0.00222717	0.00340136	0.00761421	0.0217865	0.0085034
0,-12	0.0015361	0	0.00254453	0	0.00251256	0	0.00181488	0.00760456	0.00339751	0.00828729	0.00138696	0	0	0.00634921	0	0.00294118	0.00445434	0	0.00507614	0.0196078	0.00510204
0,13	0.0015361	0.00446429	0	0	0.00251256	0.00146413	0	0	0	0	0	0	0	0.0015873	0.00530504	0	0	0	0	0.00217865	0
0,-13	0	0	0	0.0030303	0	0.00146413	0	0	0.0011325	0	0	0	0	0	0	0.00147059	0	0	0	0.0043573	0.00170068
0,14	0	0	0.00254453	0.0030303	0.00502513	0.00146413	0	0	0.0011325	0.00552486	0	0	0	0.0031746	0	0	0.00222717	0.00340136	0.00253807	0.00217865	0
0,-14	0.0015361	0	0	0	0	0	0	0	0.0011325	0.00552486	0	0	0	0	0	0.00294118	0	0.00680272	0	0	0
0,15	0.0015361	0	0	0.0030303	0	0	0	0	0.0011325	0	0.00138696	0.00367647	0	0	0	0	0	0	0	0	0
0,-15	0	0.00297619	0	0	0	0	0	0	0	0	0	0	0	0.0015873	0	0	0	0	0	0.00217865	0.00170068
0,16	0	0	0	0	0	0	0	0	0.0011325	0	0	0	0.00226757	0	0	0.00147059	0.00222717	0	0	0	0
0,-16	0	0	0	0.0030303	0	0.00146413	0	0	0.00226501	0.00276243	0	0.00367647	0	0.0015873	0	0	0	0	0	0	0
0,17	0	0	0	0	0.00251256	0	0	0	0	0	0	0	0.00226757	0.0015873	0.00530504	0	0	0	0	0.00217865	0.00340136
0,-17	0.0015361	0	0	0	0	0	0	0	0.0011325	0	0.00138696	0	0	0	0	0	0	0.00340136	0	0.00217865	0.00170068
0,18	0	0	0	0	0	0	0	0	0	0.00276243	0.00138696	0	0	0	0	0	0	0.00340136	0	0.00217865	0
0,-18	0	0	0	0	0	0	0	0	0	0	0	0	0	0	0	0	0	0	0	0.00217865	0
0,19	0.0015361	0	0	0	0.00251256	0	0	0	0	0	0	0	0	0	0	0	0	0.00340136	0	0.00217865	0
0,-19	0	0	0	0	0	0	0	0	0	0	0	0	0	0	0	0.00294118	0	0	0	0	0
0,2	0.0998464	0.10119	0.109415	0.0909091	0.0603015	0.0497804	0.0816697	0.0722433	0.127973	0.198895	0.074896	0.121324	0.0748299	0.0603175	0.159151	0.210294	0.0957684	0.12585	0.0939086	0.152505	0.0918367
0,-2	0.0952381	0.150298	0.101781	0.112121	0.140704	0.0922401	0.15245	0.13308	0.147225	0.132597	0.122053	0.205882	0.133787	0.0746032	0.127321	0.179412	0.144766	0.163265	0.170051	0.152505	0.170068
0,20	0	0	0	0	0	0	0	0	0	0.00276243	0	0	0	0.0015873	0	0	0	0	0	0	0
0,-20	0	0	0	0	0	0	0	0	0.0011325	0	0	0	0	0	0	0	0	0	0.00253807	0	0
0,21	0	0	0	0	0	0	0	0	0	0	0.00138696	0	0	0	0	0	0	0	0	0	0
0,-21	0	0	0	0	0	0	0	0	0	0	0	0	0	0	0	0	0	0	0	0	0.00340136
0,22	0	0	0.00254453	0	0	0	0	0	0	0	0	0	0	0	0	0	0	0	0	0	0
0,-22	0	0	0	0	0	0	0	0	0	0.00276243	0	0	0	0	0	0.00147059	0	0	0	0	0
0,23	0	0	0	0	0	0	0	0	0	0	0.00138696	0	0	0	0	0.00147059	0	0.00340136	0	0	0
0,-24	0	0	0	0	0	0	0	0	0	0	0	0	0	0	0.00530504	0	0	0.00340136	0	0.00217865	0.00170068
0,-25	0	0	0	0	0	0	0	0	0	0	0.00138696	0	0	0	0	0	0	0	0.00253807	0	0
0,26	0	0	0	0	0	0	0	0	0	0	0	0	0	0	0.00265252	0	0	0	0	0	0.00170068
0,-27	0	0	0	0	0	0	0	0	0	0	0	0	0	0	0	0	0	0	0	0.00217865	0
0,29	0	0	0	0	0	0	0	0	0	0.00276243	0	0	0	0	0	0	0	0	0	0	0
0,3	0.0829493	0.0699405	0.10687	0.0848485	0.113065	0.0966325	0.103448	0.0836502	0.0430351	0.0745856	0.0665742	0.136029	0.0907029	0.0650794	0.0875332	0.0779412	0.0868597	0.0884354	0.0812183	0.0740741	0.0969388
0,-3	0.12596	0.078869	0.124682	0.0818182	0.125628	0.118594	0.0852995	0.13308	0.0396376	0.0718232	0.0832178	0.143382	0.0793651	0.0809524	0.135279	0.0897059	0.122494	0.115646	0.147208	0.108932	0.120748
0,-30	0	0	0	0	0	0	0	0	0	0.00276243	0	0	0	0	0	0	0	0	0	0	0
0,4	0.0445469	0.0267857	0.0737913	0.0393939	0.0527638	0.0483163	0.0653358	0.0494297	0.0226501	0.0248619	0.0332871	0.0661765	0.0907029	0.0460317	0.0503979	0.0338235	0.0512249	0.0442177	0.0482234	0.0457516	0.0646259
0,-4	0.0506912	0.0669643	0.0814249	0.069697	0.105528	0.0629575	0.0417423	0.0456274	0.01812	0.0662983	0.0513176	0.0294118	0.113379	0.0619048	0.0928382	0.0323529	0.0534521	0.0986395	0.0507614	0.0718954	0.0867347
0,5	0.015361	0.0386905	0.0203562	0.0212121	0.0201005	0.0248902	0.0272232	0.0570342	0.0520951	0.0469613	0.0263523	0.0257353	0.0340136	0.0428571	0.0689655	0.0411765	0.0824053	0.047619	0.106599	0.0566449	0.0408163
0,-5	0.0353303	0.0342262	0.0585242	0.00909091	0.0201005	0.0248902	0.0362976	0.0342205	0.0622877	0.0469613	0.0457698	0.0257353	0.031746	0.0492063	0.0477454	0.0117647	0.0467706	0.0272109	0.0634518	0.0196078	0.0136054
0,6	0.00921659	0.00595238	0.00508906	0	0.00251256	0.00292826	0.00362976	0.00760456	0.00453001	0.00828729	0.00277393	0.00367647	0.00453515	0.0365079	0.00265252	0.0102941	0.0178174	0.00340136	0.00507614	0.0152505	0.0153061
0,-6	0.00768049	0.00595238	0	0.00606061	0.00753769	0	0.00362976	0	0.00453001	0.0138122	0.00554785	0.0110294	0.00226757	0.0126984	0.00265252	0.0176471	0.0155902	0.00680272	0.00507614	0.0043573	0.00680272
0,7	0.0138249	0.016369	0.0178117	0.00909091	0.0201005	0.0175695	0.0127042	0.0494297	0.01812	0.0138122	0.00554785	0.0294118	0.015873	0.015873	0.0159151	0.0102941	0.0244989	0.0408163	0.0228426	0.0130719	0.0102041
0,-7	0.0030722	0.0119048	0.00254453	0.0030303	0.0150754	0.00585652	0	0.0494297	0.0351076	0.0165746	0.00138696	0.0257353	0.00907029	0.031746	0.0265252	0.0102941	0.0311804	0.0170068	0.00761421	0.0217865	0.00680272
0,8	0.015361	0.0119048	0.00763359	0.00909091	0.0100503	0.0102489	0.00907441	0.00380228	0.015855	0.0165746	0.00416089	0	0	0.0174603	0.00265252	0.00294118	0.0111359	0.00680272	0.00507614	0.0043573	0.00680272
0,-8	0.00768049	0.00446429	0.0101781	0.00606061	0.0175879	0.0102489	0.00907441	0	0.00906002	0.0110497	0.00277393	0.00367647	0.00226757	0.0111111	0.00530504	0.00147059	0.00668151	0.00340136	0.00507614	0	0.00340136
0,9	0.0015361	0.0014881	0	0.00606061	0.0150754	0.00439239	0.00181488	0.026616	0.0747452	0.00276243	0.00277393	0.0147059	0.00680272	0.00793651	0.00265252	0	0.00668151	0.0102041	0.00507614	0.0196078	0.0102041
0,-9	0.0015361	0	0	0.0121212	0.00251256	0.00292826	0	0.0228137	0.01359	0.00552486	0.00138696	0.00367647	0.00226757	0.00634921	0.00795756	0.00588235	0.00668151	0.00340136	0	0.0174292	0.00340136

## Sheet: 2nd-order
	Evans_No1	Evans_No2	Evans_No3	Evans_No4	Evans_No5	Evans_No6	Evans_No7	Hancock_No1	Hancock_No2	Hancock_No3	Hancock_No4	Hancock_No5	Hancock_No6	Hancock_No7	Tyner_No1	Tyner_No2	Tyner_No3	Tyner_No4	Tyner_No5	Tyner_No6	Tyner_No7
0,0,0	0	0.121212	0.0416667	0	0	0	0	0.195122	0.0638298	0.5	0.292308	0.230769	0.413793	0.0625	0.4	0.27	0.295455	0.125	0.512195	0.0666667	0.183673
0,0,1	0	0.212121	0.25	0.176471	0.125	0.166667	0.5	0	0.0851064	0	0.215385	0	0.137931	0.09375	0	0.03	0.0227273	0.125	0	0.0666667	0.0612245
0,0,-1	0	0.030303	0.0416667	0	0.0625	0.166667	0	0	0.106383	0	0.0769231	0.0769231	0	0.1875	0	0.03	0.0227273	0	0.0487805	0.0666667	0.0408163
0,0,10	0	0	0	0	0	0	0	0.0243902	0	0.0714286	0	0	0	0	0	0	0	0	0	0	0
0,0,-10	0	0	0	0	0	0	0	0	0	0	0	0	0	0	0	0.01	0	0	0	0	0
0,0,-11	0	0	0	0	0	0	0	0	0	0	0	0	0	0.0625	0	0.01	0.0227273	0	0	0	0
0,0,12	0	0	0	0	0	0.166667	0	0	0	0	0.0153846	0	0	0	0	0	0	0	0.0243902	0	0.0204082
0,0,-12	0	0	0	0	0	0	0	0.0243902	0	0.0714286	0	0	0	0.03125	0	0	0.0227273	0	0	0.0666667	0
0,0,13	0	0.030303	0	0	0	0	0	0	0	0	0	0	0	0	0	0	0	0	0	0	0
0,0,14	0	0	0	0	0	0	0	0	0	0	0	0	0	0	0	0	0.0227273	0	0	0	0
0,0,-14	0	0	0	0	0	0	0	0	0	0	0	0	0	0	0	0.01	0	0	0	0	0
0,0,15	0	0	0	0	0	0	0	0	0.0212766	0	0	0	0	0	0	0	0	0	0	0	0
0,0,16	0	0	0	0	0	0	0	0	0.0212766	0	0	0	0	0	0	0	0	0	0	0	0
0,0,-16	0	0	0	0	0	0	0	0	0.0212766	0	0	0	0	0	0	0	0	0	0	0	0
0,0,17	0	0	0	0	0	0	0	0	0	0	0	0	0	0	0.0666667	0	0	0	0	0	0
0,0,-17	0	0	0	0	0	0	0	0	0	0	0	0	0	0	0	0	0	0	0	0	0.0204082
0,0,2	0.153846	0.121212	0.166667	0	0.1875	0	0	0.0243902	0.12766	0.142857	0	0	0	0.03125	0	0.26	0.0909091	0.166667	0.121951	0.0666667	0.0408163
0,0,-2	0	0.0606061	0.0833333	0.176471	0.0625	0.166667	0.5	0.0731707	0.212766	0	0.184615	0.230769	0.172414	0.09375	0	0.12	0.136364	0.166667	0.097561	0.133333	0.0408163
0,0,-20	0	0	0	0	0	0	0	0	0	0	0	0	0	0	0	0	0	0	0.0243902	0	0
0,0,-21	0	0	0	0	0	0	0	0	0	0	0	0	0	0	0	0	0	0	0	0	0.0204082
0,0,-27	0	0	0	0	0	0	0	0	0	0	0	0	0	0	0	0	0	0	0	0.0666667	0
0,0,3	0.153846	0.0909091	0	0	0.0625	0.166667	0	0.0487805	0.0425532	0	0.0153846	0.153846	0.0689655	0.125	0.2	0.13	0.0454545	0.125	0.097561	0	0.102041
0,0,-3	0.153846	0.0606061	0.208333	0.235294	0.125	0	0	0.268293	0.0425532	0	0.0461538	0.0769231	0	0.125	0.133333	0.05	0.0909091	0	0	0.333333	0.102041
0,0,4	0.153846	0	0.0416667	0	0	0	0	0.0243902	0.0212766	0	0	0	0	0.03125	0.0666667	0.01	0.0227273	0.0416667	0.0487805	0	0.122449
0,0,-4	0.307692	0.151515	0.0416667	0.294118	0.25	0	0	0.146341	0.0212766	0.142857	0.0153846	0	0.0344828	0.03125	0	0.01	0.0227273	0.125	0	0	0.0408163
0,0,5	0	0	0	0	0	0.166667	0	0.0487805	0.0212766	0	0.0153846	0.0769231	0.0344828	0.0625	0	0.03	0.0681818	0	0	0.0666667	0.0816327
0,0,-5	0.0769231	0	0.125	0	0.0625	0	0	0.0243902	0.0851064	0	0.0923077	0	0	0	0	0	0	0	0.0243902	0	0
0,0,6	0	0	0	0	0	0	0	0	0	0	0	0	0	0	0	0	0	0	0	0	0.0408163
0,0,-6	0	0.030303	0	0	0.0625	0	0	0	0	0	0.0153846	0	0	0.03125	0	0.02	0.0454545	0	0	0	0.0408163
0,0,7	0	0.030303	0	0	0	0	0	0.0243902	0.0425532	0.0714286	0	0.0384615	0.0689655	0	0	0.01	0.0227273	0.0416667	0	0	0
0,0,-7	0	0	0	0	0	0	0	0.0243902	0.0212766	0	0	0.0769231	0.0344828	0	0.0666667	0	0.0227273	0.0416667	0	0.0666667	0.0204082
0,0,8	0	0.0606061	0	0	0	0	0	0.0243902	0	0	0	0	0	0	0	0	0	0	0	0	0
0,0,-8	0	0	0	0.0588235	0	0	0	0	0.0212766	0	0.0153846	0	0	0	0.0666667	0	0	0	0	0	0
0,0,9	0	0	0	0	0	0	0	0	0	0	0	0.0384615	0.0344828	0	0	0	0	0.0416667	0	0	0
0,0,-9	0	0	0	0.0588235	0	0	0	0.0243902	0.0212766	0	0	0	0	0.03125	0	0	0.0227273	0	0	0	0.0204082
0,1,0	0.166667	0.180952	0.0961538	0.04	0	0.10101	0.202899	0.714286	0.142857	0.107143	0.352941	0.333333	0.214286	0.155844	0.210526	0.148148	0.153846	0.142857	0	0.107143	0.291667
0,-1,0	0.21	0.111111	0.25	0.155556	0.0666667	0.0484848	0.102362	0	0.0454545	0.0322581	0.159722	0	0.12069	0.163043	0.4375	0.121212	0.130435	0.0714286	0	0.173913	0.152174
0,1,1	0.015873	0.0666667	0.173077	0.04	0.0222222	0.020202	0	0	0.0178571	0.0357143	0.0196078	0	0.0714286	0.142857	0.0526316	0.111111	0	0.142857	0	0.0357143	0.125
0,1,-1	0.015873	0.0285714	0.0576923	0.0933333	0.111111	0.040404	0.0434783	0	0.0178571	0	0.0392157	0	0.0238095	0.012987	0	0.037037	0.0769231	0	0	0	0
0,-1,1	0.02	0	0.0714286	0	0	0.0121212	0	0	0.00757576	0	0.0486111	0	0.0172414	0	0.0625	0.030303	0.0434783	0	0	0.0434783	0
0,-1,-1	0.02	0.0606061	0.0357143	0.0222222	0.0666667	0.00606061	0.00787402	0	0.030303	0.0322581	0.0694444	0.111111	0.0862069	0.0108696	0	0.121212	0	0.0714286	0.153846	0	0.130435
0,1,10	0	0	0	0	0	0	0.0144928	0	0	0	0	0	0	0.012987	0	0	0	0	0	0	0
0,1,-10	0	0	0	0	0	0	0	0	0	0	0	0	0.0238095	0	0	0	0	0	0	0	0
0,-1,10	0	0	0	0	0	0.00606061	0	0	0	0	0	0	0	0.0108696	0	0.030303	0	0	0	0	0
0,-1,-10	0	0	0	0.0222222	0	0.00606061	0	0	0	0	0.00694444	0	0	0	0	0	0	0	0	0	0.0217391
0,1,11	0.00793651	0	0	0	0.0222222	0	0	0	0.0178571	0	0.00980392	0	0	0	0	0	0	0	0	0	0
0,1,-11	0.00793651	0	0	0	0	0	0	0	0	0	0	0	0	0	0	0	0	0	0	0.0357143	0
0,-1,11	0	0	0	0	0.0333333	0.00606061	0	0	0	0	0.00694444	0	0	0	0	0	0	0	0	0	0
0,1,12	0.00793651	0.0190476	0	0	0	0.010101	0	0	0	0	0	0	0	0	0	0	0	0	0	0	0
0,-1,-12	0	0	0	0	0	0	0	0	0	0	0	0	0	0.0108696	0	0	0	0	0	0	0
0,1,13	0	0	0	0	0.0444444	0	0.0144928	0	0	0	0.00980392	0	0	0	0	0	0	0	0	0	0
0,1,-13	0.00793651	0	0	0	0	0	0	0	0	0	0	0	0	0	0	0	0	0	0	0	0
0,-1,13	0	0	0	0	0.0333333	0	0	0	0	0	0	0	0	0	0	0	0	0	0	0	0
0,-1,-13	0	0	0	0	0	0	0	0	0.00757576	0	0	0	0	0	0	0	0	0	0	0	0
0,1,-14	0	0	0	0	0	0	0	0	0	0	0	0	0	0	0	0	0	0	0	0.0357143	0
0,-1,-14	0	0	0	0	0	0	0	0	0	0	0	0	0	0	0	0	0	0	0	0	0.0217391
0,1,15	0	0	0.0192308	0	0	0	0	0	0	0	0	0	0	0	0	0	0	0	0	0	0
0,1,-15	0	0	0	0.0133333	0	0	0	0	0	0	0	0	0	0	0	0	0	0	0	0	0
0,1,17	0	0	0	0	0	0	0	0	0	0	0	0	0.0238095	0	0	0	0	0	0	0	0
0,1,18	0	0	0	0	0	0	0	0	0	0	0	0	0	0	0	0	0	0	0	0	0.0416667
0,1,-18	0	0	0	0	0	0	0	0	0	0	0	0	0	0	0	0.037037	0	0	0	0	0
0,1,2	0.111111	0.171429	0.0769231	0.24	0.222222	0.272727	0.0869565	0	0.0178571	0.107143	0.245098	0	0.166667	0.168831	0.0526316	0	0	0.142857	0	0.0714286	0.125
0,1,-2	0.150794	0.0380952	0.0769231	0.08	0.0222222	0.0707071	0.0869565	0.142857	0.107143	0.0357143	0.0294118	0	0.047619	0.0649351	0.368421	0.0740741	0.0769231	0	0.4	0	0.0833333
0,-1,2	0.12	0.030303	0.0714286	0.0444444	0.0333333	0.0484848	0.0629921	0	0.136364	0.0967742	0.0208333	0.111111	0.0172414	0.0543478	0.125	0.0909091	0.0869565	0.285714	0.153846	0	0.217391
0,-1,-2	0.2	0.292929	0.142857	0.355556	0.166667	0.563636	0.393701	0	0.386364	0.354839	0.409722	0	0.275862	0.23913	0	0.0909091	0.173913	0	0	0	0.0217391
0,1,20	0.00793651	0	0	0	0	0	0	0	0	0	0	0	0	0	0	0	0	0	0	0	0
0,1,23	0	0	0.0192308	0	0	0	0	0	0	0	0	0	0	0	0	0	0	0	0	0	0
0,1,-23	0	0	0	0	0	0	0	0	0	0	0	0	0	0	0	0	0	0	0	0.0357143	0
0,-1,-26	0	0	0	0	0	0	0	0	0	0	0	0	0	0	0	0	0	0	0.0769231	0	0
0,1,3	0.246032	0.295238	0.25	0.213333	0.0444444	0.131313	0.231884	0	0.553571	0.535714	0.147059	0	0.0952381	0.116883	0.105263	0.333333	0.0769231	0.285714	0.2	0.357143	0.166667
0,1,-3	0.031746	0.00952381	0.0384615	0.0666667	0.111111	0.0606061	0.0144928	0	0	0	0	0	0.142857	0.0519481	0.105263	0	0.0769231	0	0	0.0714286	0.166667
0,-1,3	0.01	0	0	0.0444444	0	0.0181818	0.015748	0	0.0454545	0.0967742	0.0138889	0	0	0.0434783	0	0.030303	0	0	0	0.0434783	0.0652174
0,-1,-3	0.21	0.333333	0.214286	0.2	0.4	0.151515	0.244094	0.857143	0.113636	0.354839	0.208333	0.444444	0.258621	0.152174	0	0.272727	0.26087	0.214286	0	0.304348	0.217391
0,1,4	0.0714286	0.0761905	0.0192308	0.0933333	0.111111	0.141414	0.115942	0	0.0178571	0.0714286	0.0980392	0.333333	0.047619	0.038961	0.105263	0.037037	0.307692	0.142857	0.4	0.0357143	0
0,1,-4	0.00793651	0.0285714	0	0.0133333	0	0.020202	0.0144928	0	0	0.0714286	0.00980392	0	0	0	0	0	0	0	0	0.0357143	0
0,-1,4	0.03	0.010101	0.0357143	0	0.0333333	0.0242424	0.00787402	0	0.0681818	0	0.00694444	0	0	0	0	0.030303	0.0434783	0	0.0769231	0	0.0434783
0,-1,-4	0.07	0.040404	0	0.0666667	0.0666667	0.0484848	0.0866142	0	0.00757576	0	0.0347222	0	0.0689655	0.0978261	0	0.121212	0.0869565	0	0.153846	0.130435	0.0217391
0,1,5	0.0555556	0.0380952	0.134615	0.04	0.133333	0.0707071	0.144928	0	0.0357143	0	0	0.333333	0.119048	0.038961	0	0.185185	0	0.142857	0	0.0714286	0
0,1,-5	0.00793651	0.00952381	0	0	0	0	0	0	0	0	0.0196078	0	0	0.025974	0	0	0	0	0	0	0
0,-1,5	0.02	0	0	0	0	0.00606061	0.00787402	0	0.0151515	0	0	0	0	0.0217391	0	0	0.0434783	0	0	0.0869565	0
0,-1,-5	0.01	0.0707071	0.142857	0	0.0666667	0.0121212	0.023622	0.142857	0.0151515	0.0322581	0	0.222222	0.137931	0.0869565	0.1875	0	0	0.357143	0.307692	0.0869565	0.0869565
0,1,6	0.00793651	0.0190476	0	0.0266667	0.0444444	0.020202	0.0144928	0	0.0178571	0	0	0	0	0.038961	0	0	0.153846	0	0	0.0357143	0
0,1,-6	0.00793651	0.0190476	0	0	0.0222222	0	0	0	0.0178571	0	0	0	0	0.0519481	0	0	0	0	0	0.0357143	0
0,-1,6	0.01	0	0	0	0	0	0	0	0.00757576	0	0	0	0	0	0	0.0606061	0.0869565	0	0	0	0
0,-1,-6	0.04	0.030303	0	0	0.0333333	0.0121212	0.015748	0	0.0227273	0	0.00694444	0	0	0.0543478	0.0625	0	0	0	0	0	0
0,1,7	0.00793651	0	0	0	0	0	0	0.142857	0	0	0.00980392	0	0	0.0519481	0	0	0.0769231	0	0	0.0357143	0
0,1,-7	0.015873	0	0.0192308	0	0.0444444	0.020202	0	0	0.0357143	0.0357143	0	0	0	0.012987	0	0	0	0	0	0	0
0,-1,7	0.03	0	0	0.0444444	0	0	0.015748	0	0	0	0.00694444	0	0	0.0217391	0	0	0	0	0	0	0
0,-1,-7	0	0	0	0	0	0	0	0	0	0	0	0	0	0.0108696	0	0	0	0	0.0769231	0	0
0,1,8	0.015873	0	0.0192308	0.0133333	0	0.010101	0.0144928	0	0	0	0	0	0.0238095	0	0	0.037037	0	0	0	0	0
0,1,-8	0	0	0	0.0266667	0	0.010101	0	0	0	0	0	0	0	0	0	0	0	0	0	0	0
0,-1,8	0	0	0	0.0222222	0	0	0	0	0	0	0	0	0.0172414	0.0108696	0	0	0.0434783	0	0	0.0434783	0
0,-1,-8	0	0.010101	0	0	0	0	0	0	0.0909091	0	0	0	0	0.0108696	0	0	0	0	0	0.0869565	0
0,1,9	0.0238095	0	0	0	0.0444444	0	0	0	0	0	0.00980392	0	0	0.012987	0	0	0	0	0	0	0
0,-1,9	0	0	0	0	0	0.0242424	0	0	0	0	0	0	0	0	0.125	0	0	0	0	0	0
0,-1,-9	0	0.010101	0.0357143	0.0222222	0	0.00606061	0.015748	0	0	0	0	0.111111	0	0	0	0	0	0	0	0	0
0,10,0	0	0	0	0	0	0.0909091	0	0	0	0	0	0	0	0.333333	0	0	0	0	0.333333	0	0.125
0,-10,0	0	0	0	1	0	0	0	0	0	0	0	0	0	0	0	1	0	0	0	0	1
0,10,1	0	0	0	0	0.25	0	0	0	0	0	0	0	0	0	0	0	0	0	0	0	0
0,10,10	0	0	0	0	0.25	0	0	0.5	0	0	0.333333	0	0	0.333333	0	0.333333	1	0	0	0.333333	0.25
0,10,11	0	0	1	0	0	0	0	0	0	0	0	0	0	0	0	0	0	0	0	0	0
0,10,12	0	0	0	0	0.25	0	0	0.5	0	0	0	0	0	0	0.25	0.333333	0	1	0	0.333333	0
0,-10,-12	0	0	0	0	0	0	0	0	0	0	0	0	0	0.25	0	0	0	0	0	0	0
0,10,13	0	0	0	0	0	0.0909091	0	0	0	0	0	0	0	0	0	0	0	0	0	0	0
0,10,15	0	0	0	0	0	0	0	0	0	0	0	0	0	0	0	0.333333	0	0	0	0	0
0,10,19	0	0	0	0	0	0	0	0	1	0	0	0	0	0	0	0	0	0	0	0	0
0,10,2	0	0	0	0	0	0	0	0	0	0	0	0	0	0	0	0	0	0	0.333333	0	0
0,-10,2	0	0	0	0	0	0	0	0	0	0	0	0	0	0.25	0	0	0	0	0	0	0
0,-10,-2	0	0	0	0	0	0.5	0	0	0.5	0	0	0	0	0	0	0	0	0	0	0	0
0,10,-3	0	0	0	0	0	0.0909091	0	0	0	0	0	0	0	0	0	0	0	0	0	0	0
0,10,4	0	0	0	0	0	0	0	0	0	0.5	0	0	0	0	0	0	0	0	0	0	0
0,-10,4	0	0	0	0	0	0	0	0	0.5	0	0	0	0	0	0	0	0	0	0	0	0
0,-10,-4	0	0	0	0	0	0	0	0	0	1	0	0	0	0	0	0	0	0	0	0	0
0,10,5	0	0	0	0	0	0.0909091	0	0	0	0	0	0	0	0.333333	0	0	0	0	0.333333	0	0
0,-10,-5	0	1	0	0	0	0	0	0	0	0	1	0	0	0.25	0	0	0	0	0.5	0	0
0,10,6	0	0	0	0	0	0.0909091	0	0	0	0.5	0	0	0.5	0	0	0	0	0	0	0	0.125
0,10,7	1	0.333333	0	0	0.25	0.181818	0	0	0	0	0.666667	0	0.5	0	0.5	0	0	0	0	0.333333	0.5
0,-10,-7	1	0	1	0	0	0.5	0	0	0	0	0	1	0	0	0	0	0	1	0.5	1	0
0,10,8	0	0.666667	0	0	0	0.181818	1	0	0	0	0	0	0	0	0.25	0	0	0	0	0	0
0,10,9	0	0	0	1	0	0.181818	0	0	0	0	0	0	0	0	0	0	0	0	0	0	0
0,-10,-9	0	0	0	0	1	0	0	0	0	0	0	0	0	0.25	0	0	0	0	0	0	0
0,11,0	0	0	0	0	0	0	0	0	0	0	0	0	0	0.222222	0	0	0	0	0	0	0
0,-11,0	0	0	0	0	0	0	0	0	0	0	0	0	0	0.833333	0	0	0	0	0	0	0
0,-11,-1	0	0	0	0	0.5	0	0	0	0	0	0	0	0	0	0	0	0	0	0	0	0
0,11,10	0	0	0	0	0	0	0	0	0	0	0	0	0	0.111111	0	0	0	0	0	0	1
0,-11,-10	0	0	0	0	0.5	0	0	0	0	0	0	0	0	0	0	0	0	0	0	0	0
0,11,11	0	0	0	0	0	0	0	0	0	0	0	0	0	0.222222	0	0	0	0	0	0	0
0,11,12	0.5	0	0	0	1	0	1	0	0	0	0	0	0	0.222222	0	0	0	0	0	0	0
0,-11,-12	1	0	0	0	0	0	0	0	0	0	0	0	0	0	0	0	0	0	0	1	0
0,11,13	0	0	0	0	0	0	0	0	0	0	0	0	0	0	0	0	1	0	0	0	0
0,-11,-13	0	0	0	0	0	0	0	0	0	0	0	0	0	0	0	0	1	0	0	0	0
0,11,14	0	0	0	0	0	0	0	0	0	0	0	0	1	0	0	0	0	0	0	0	0
0,-11,-14	0	0	0	0	0	0	0	0	0	0	0	0	0	0.166667	0	0	0	0	0	0	0
0,11,15	0	0	0	0	0	0	0	0	0	0	0	0	0	0.111111	0	0	0	0	0	0	0
0,-11,-2	0	0	0	0	0	0	0	0	1	0	0	0	0	0	0	0	0	0	0	0	0
0,11,5	0	0	0	0	0	0	0	0	0	0	0	0	0	0	0	1	0	0	0	0	0
0,-11,5	0	0	0	0	0	0	0	0	0	0	0	0	0	0	0	0.5	0	0	0	0	0
0,11,7	0	0.25	0	0	0	0.333333	0	0	0	0	0	0	0	0	0	0	0	0	0	0	0
0,-11,-7	0	0	0	0	0	0	0	0	0	0	0	0	1	0	0	0.5	0	0	0	0	0
0,11,8	0.5	0.25	0	0	0	0	0	0	0.333333	0	0	0	0	0.111111	1	0	0	0	0	0	0
0,11,9	0	0.5	0	0	0	0.666667	0	0	0.666667	1	0	0	0	0	0	0	0	0	0	0	0
0,12,0	0	0	0	0	0	0	0	0	0	0	0	0	0	0.25	0	0	0	0	0	0.2	0.2
0,-12,0	0	0	0	0	0	0	0	0	0	0	0	0	0	0	0	0	0	0	0	0.555556	1
0,12,1	0	0	0	0	0.333333	0	0	0	0	0	0	0	0	0.25	0	0	0	0	0	0	0
0,-12,1	1	0	0	0	0	0	0	0	0	0	0	0	0	0	0	0	0	0	0	0	0
0,-12,-1	0	0	0	0	0	0	0	0	0	0.333333	0	0	0	0	0	0	0	0	0	0	0
0,12,10	0	0	0	0	0.333333	0	1	0	0	0	0	0	0	0	0	0.333333	0	0	0	0	0
0,12,11	0	0	0	0	0	0.5	0	0	0	0	0	0	0	0	0	0	0	1	0.333333	0.1	0
0,-12,-11	0	0	0	0	1	0	0	0	0	0	0	0	0	0	0	0	0	0	0	0	0
0,12,12	0	0	0	0	0	0	0	0	0	0	0.125	0	0	0.25	0	0.333333	0	0	0.666667	0.2	0.2
0,-12,-12	0	0	0	0	0	0	0	0.5	0.333333	0	0	0	0	0	0	0	0.5	0	0	0	0
0,12,14	0	0	0	0	0	0	0	0	0	0	0	0	0	0	0	0.333333	0	0	0	0.2	0.2
0,-12,-14	0	0	0	0	0	0	0	0	0	0.333333	0	0	0	0.25	0	0	0	0	0	0	0
0,12,15	0	0	0	1	0	0	0	0	0	0	0	0	0	0	0	0	0	0	0	0	0.2
0,-12,-15	0	0	0	0	0	0	0	0	0	0	0	0	0	0	0	0.5	0	0	0	0	0
0,-12,-16	0	0	0	0	0	0	0	0	0	0	1	0	0	0	0	0	0	0	0	0	0
0,12,17	1	0	0	0	0	0	0	0	0	0	0	0	0	0	0	0	0	0	0	0	0
0,-12,-17	0	0	0	0	0	0	0	0	0	0	0	0	0	0.25	0	0	0	0	0	0	0
0,12,19	0	0	0	0	0	0	0	1	0	0	0	0	0	0	0	0	0	0	0	0	0
0,-12,2	0	0	0	0	0	0	0	0	0	0	0	0	0	0.25	0	0	0	0	0.5	0	0
0,-12,-2	0	0	0	0	0	0	0	0	0	0	0	0	0	0	0	0	0	0	0	0.111111	0
0,-12,-21	0	0	0	0	0	0	0	0	0	0	0	0	0	0.25	0	0	0	0	0	0	0
0,12,3	0	0	0	0	0	0	0	0	0	0	0	0	0	0	0	0	0	0	0	0.3	0
0,-12,-3	0	0	0	0	0	0	0	0	0	0	0	0	0	0	0	0	0	0	0	0.111111	0
0,12,4	0	1	0	0	0	0	0	0	0	0	0	0	0	0	0	0	0	0	0	0	0
0,12,-4	0	0	0	0	0	0	0	0	0	0	0	1	0	0	0	0	0	0	0	0	0
0,-12,-5	0	0	0	0	0	0	0	0	0	0	0	0	0	0	0	0	0	0	0.5	0	0
0,12,6	0	0	0	0	0	0	0	0	0	0	0.0625	0	0	0	0	0	0	0	0	0	0
0,-12,6	0	0	0	0	0	0	0	0	0	0	0	0	0	0	0	0	0	0	0	0.111111	0
0,12,7	0	0	0	0	0	0	0	0	0	0	0	0	0	0.25	0	0	0	0	0	0	0
0,-12,-7	0	0	0	0	0	0	0	0.5	0.666667	0	0	0	0	0	0	0.5	0	0	0	0	0
0,12,8	0	0	0	0	0.333333	0.5	0	0	0	0	0.3125	0	0	0	0	0	0	0	0	0	0
0,-12,8	0	0	0	0	0	0	0	0	0	0.333333	0	0	0	0	0	0	0	0	0	0	0
0,-12,-8	0	0	1	0	0	0	1	0	0	0	0	0	0	0	0	0	0.5	0	0	0.111111	0
0,12,9	0	0	0	0	0	0	0	0	1	0	0.5	0	0	0	0	0	1	0	0	0	0.2
0,-13,0	0	0	0	0	0	0	0	0	0	0	0	0	0	0	0	0	0	0	0	0.5	0
0,13,10	0	0	0	0	1	0	0	0	0	0	0	0	0	0	0	0	0	0	0	0	0
0,13,11	0	0.333333	0	0	0	1	0	0	0	0	0	0	0	0	0	0	0	0	0	0	0
0,13,12	1	0	0	0	0	0	0	0	0	0	0	0	0	0	0	0	0	0	0	0	0
0,13,13	0	0	0	0	0	0	0	0	0	0	0	0	0	0	0.5	0	0	0	0	0	0
0,-13,-13	0	0	0	0	0	0	0	0	0	0	0	0	0	0	0	0	0	0	0	0	1
0,13,14	0	0.333333	0	0	0	0	0	0	0	0	0	0	0	0	0	0	0	0	0	0	0
0,13,17	0	0	0	0	0	0	0	0	0	0	0	0	0	0	0.5	0	0	0	0	0	0
0,-13,-20	0	0	0	0	0	0	0	0	0	0	0	0	0	0	0	1	0	0	0	0	0
0,13,3	0	0.333333	0	0	0	0	0	0	0	0	0	0	0	0	0	0	0	0	0	0	0
0,-13,-3	0	0	0	0	0	1	0	0	0	0	0	0	0	0	0	0	0	0	0	0	0
0,-13,-4	0	0	0	0	0	0	0	0	1	0	0	0	0	0	0	0	0	0	0	0	0
0,13,7	0	0	0	0	0	0	0	0	0	0	0	0	0	0	0	0	0	0	0	1	0
0,13,8	0	0	0	0	0	0	0	0	0	0	0	0	0	1	0	0	0	0	0	0	0
0,-13,-8	0	0	0	0	0	0	0	0	0	0	0	0	0	0	0	0	0	0	0	0.5	0
0,-13,-9	0	0	0	1	0	0	0	0	0	0	0	0	0	0	0	0	0	0	0	0	0
0,-14,0	0	0	0	0	0	0	0	0	0	0.5	0	0	0	0	0	0	0	0	0	0	0
0,14,10	0	0	0	0	1	1	0	0	0	0.5	0	0	0	0	0	0	0	0	0	0	0
0,-14,-10	0	0	0	0	0	0	0	0	0	0	0	0	0	0	0	0.5	0	0	0	0	0
0,14,12	0	0	0	0	0	0	0	0	0	0	0	0	0	0	0	0	1	1	0	0	0
0,-14,-12	0	0	0	0	0	0	0	0	0	0	0	0	0	0	0	0	0	0.5	0	0	0
0,-14,-13	1	0	0	0	0	0	0	0	0	0	0	0	0	0	0	0	0	0	0	0	0
0,14,14	0	0	1	0	0	0	0	0	0	0.5	0	0	0	0.5	0	0	0	0	0	0	0
0,14,17	0	0	0	1	0	0	0	0	0	0	0	0	0	0	0	0	0	0	0	0	0
0,-14,-17	0	0	0	0	0	0	0	0	0	0	0	0	0	0	0	0.5	0	0.5	0	0	0
0,14,19	0	0	0	0	0	0	0	0	1	0	0	0	0	0	0	0	0	0	0	0	0
0,14,26	0	0	0	0	0	0	0	0	0	0	0	0	0	0	0	0	0	0	0	1	0
0,14,4	0	0	0	0	0	0	0	0	0	0	0	0	0	0.5	0	0	0	0	1	0	0
0,-14,-5	0	0	0	0	0	0	0	0	1	0	0	0	0	0	0	0	0	0	0	0	0
0,-14,-9	0	0	0	0	0	0	0	0	0	0.5	0	0	0	0	0	0	0	0	0	0	0
0,-15,-10	0	0.5	0	0	0	0	0	0	0	0	0	0	0	0	0	0	0	0	0	0	0
0,15,12	0	0	0	0	0	0	0	0	0	0	0	1	0	0	0	0	0	0	0	0	0
0,-15,-12	0	0	0	0	0	0	0	0	0	0	0	0	0	0	0	0	0	0	0	0	1
0,15,13	1	0	0	0	0	0	0	0	0	0	0	0	0	0	0	0	0	0	0	0	0
0,15,14	0	0	0	1	0	0	0	0	1	0	0	0	0	0	0	0	0	0	0	0	0
0,-15,-17	0	0	0	0	0	0	0	0	0	0	0	0	0	0	0	0	0	0	0	1	0
0,15,20	0	0	0	0	0	0	0	0	0	0	1	0	0	0	0	0	0	0	0	0	0
0,-15,-8	0	0.5	0	0	0	0	0	0	0	0	0	0	0	0	0	0	0	0	0	0	0
0,-15,-9	0	0	0	0	0	0	0	0	0	0	0	0	0	1	0	0	0	0	0	0	0
0,16,11	0	0	0	0	0	0	0	0	0	0	0	0	1	0	0	0	0	0	0	0	0
0,-16,-11	0	0	0	0	0	0	0	0	0.5	1	0	0	0	0	0	0	0	0	0	0	0
0,-16,-14	0	0	0	0	0	0	0	0	0.5	0	0	0	0	0	0	0	0	0	0	0	0
0,16,15	0	0	0	0	0	0	0	0	1	0	0	0	0	0	0	0	0	0	0	0	0
0,-16,-15	0	0	0	0	0	0	0	0	0	0	0	1	0	1	0	0	0	0	0	0	0
0,16,18	0	0	0	0	0	0	0	0	0	0	0	0	0	0	0	1	0	0	0	0	0
0,16,26	0	0	0	0	0	0	0	0	0	0	0	0	0	0	0	0	1	0	0	0	0
0,-16,-7	0	0	0	0	0	1	0	0	0	0	0	0	0	0	0	0	0	0	0	0	0
0,-16,-8	0	0	0	1	0	0	0	0	0	0	0	0	0	0	0	0	0	0	0	0	0
0,-17,-12	0	0	0	0	0	0	0	0	1	0	1	0	0	0	0	0	0	0	0	0	0
0,17,13	0	0	0	0	1	0	0	0	0	0	0	0	0	0	0	0	0	0	0	0	0
0,17,14	0	0	0	0	0	0	0	0	0	0	0	0	1	0	0	0	0	0	0	0	0
0,-17,-15	0	0	0	0	0	0	0	0	0	0	0	0	0	0	0	0	0	1	0	1	1
0,17,16	0	0	0	0	0	0	0	0	0	0	0	0	0	0	0	0	0	0	0	0	0.5
0,17,17	0	0	0	0	0	0	0	0	0	0	0	0	0	0	1	0	0	0	0	0	0.5
0,-17,-2	1	0	0	0	0	0	0	0	0	0	0	0	0	0	0	0	0	0	0	0	0
0,17,5	0	0	0	0	0	0	0	0	0	0	0	0	0	1	0	0	0	0	0	1	0
0,18,12	0	0	0	0	0	0	0	0	0	1	0	0	0	0	0	0	0	0	0	0	0
0,18,17	0	0	0	0	0	0	0	0	0	0	0	0	0	0	0	0	0	0	0	1	0
0,-18,-17	0	0	0	0	0	0	0	0	0	0	0	0	0	0	0	0	0	0	0	1	0
0,18,19	0	0	0	0	0	0	0	0	0	0	1	0	0	0	0	0	0	0	0	0	0
0,18,22	0	0	0	0	0	0	0	0	0	0	0	0	0	0	0	0	0	1	0	0	0
0,-19,-15	0	0	0	0	0	0	0	0	0	0	0	0	0	0	0	0.5	0	0	0	0	0
0,19,16	1	0	0	0	0	0	0	0	0	0	0	0	0	0	0	0	0	0	0	0	0
0,19,17	0	0	0	0	1	0	0	0	0	0	0	0	0	0	0	0	0	1	0	1	0
0,-19,-17	0	0	0	0	0	0	0	0	0	0	0	0	0	0	0	0.5	0	0	0	0	0
0,2,0	0.184615	0.205882	0.116279	0.1	0.208333	0.176471	0.2	0.263158	0.141593	0.0555556	0.0925926	0.454545	0.151515	0.210526	0.0338983	0.202797	0.162791	0.297297	0.135135	0.2	0.259259
0,-2,0	0.0322581	0.0990099	0.1	0.135135	0.109091	0.0322581	0.0833333	0.114286	0.146154	0.0625	0.125	0.285714	0.0847458	0.0851064	0.166667	0.262295	0.123077	0.1875	0.119403	0.217391	0.11
0,2,1	0.0307692	0	0	0	0	0	0	0	0.00884956	0.0416667	0.12963	0	0	0.0526316	0.0169492	0.013986	0	0	0.027027	0.0142857	0.037037
0,2,-1	0.0769231	0	0.0465116	0.0666667	0.0833333	0.0882353	0.0666667	0	0.0442478	0.0277778	0.037037	0.030303	0	0.0263158	0.0508475	0.048951	0.139535	0	0.162162	0.0428571	0.0555556
0,-2,1	0.016129	0.019802	0.05	0.0810811	0.0181818	0.016129	0	0	0.00769231	0	0.0681818	0.0178571	0.0677966	0.0212766	0	0	0.0153846	0.0208333	0.0149254	0.0144928	0.04
0,-2,-1	0.0967742	0.039604	0.075	0.135135	0.0909091	0.177419	0.0833333	0.0285714	0.0153846	0.0416667	0.0681818	0	0.0338983	0.0851064	0.0208333	0	0.0153846	0	0.0149254	0	0.01
0,2,10	0	0.0294118	0	0	0	0	0	0	0	0	0	0	0	0	0	0	0	0	0	0	0
0,2,-10	0	0	0	0	0	0	0	0	0.00884956	0	0	0	0	0	0	0	0	0	0.027027	0.0142857	0.0185185
0,-2,10	0	0	0	0	0	0	0	0	0	0	0	0	0	0.0638298	0	0	0	0	0.0149254	0.0144928	0
0,-2,-10	0.016129	0	0	0	0.0363636	0.016129	0.0357143	0	0	0	0	0	0	0	0.0208333	0.00819672	0	0.0208333	0	0	0
0,2,11	0	0	0	0	0	0	0	0	0.00884956	0	0	0	0	0	0	0	0	0.027027	0	0	0
0,-2,11	0	0.00990099	0	0	0.0181818	0.016129	0	0	0	0	0	0	0	0	0	0	0	0	0	0	0
0,-2,-11	0	0	0	0	0	0	0	0	0	0	0	0	0	0	0.0208333	0.00819672	0.0153846	0	0	0	0
0,2,12	0	0	0	0	0	0	0.0222222	0	0	0	0	0	0	0	0	0	0	0	0.027027	0	0
0,2,-12	0	0	0	0	0	0	0	0	0	0.0277778	0	0	0	0	0	0.00699301	0	0.027027	0	0	0
0,-2,12	0	0	0	0	0.0181818	0	0	0	0	0	0	0	0	0	0	0	0	0	0	0	0
0,-2,-12	0	0	0.025	0	0	0	0	0	0	0	0	0	0	0.0212766	0	0	0	0	0	0.0144928	0
0,2,13	0	0	0	0	0	0	0	0	0	0	0	0	0	0.0263158	0	0	0	0	0	0	0
0,2,-13	0	0.0147059	0	0	0	0	0	0	0	0	0	0	0	0	0	0	0	0	0	0	0
0,2,14	0	0	0	0	0	0	0	0	0	0	0.0185185	0	0	0	0	0	0	0	0	0	0.0185185
0,-2,-14	0	0	0	0	0	0	0.0119048	0	0	0.0208333	0	0	0	0	0	0	0.0153846	0	0.0149254	0	0
0,2,15	0	0	0	0	0	0	0	0	0	0	0	0	0	0	0.0169492	0	0	0	0	0	0
0,2,-15	0	0	0	0	0	0	0	0	0	0	0.0185185	0	0	0	0	0	0	0	0	0	0
0,-2,15	0	0	0	0	0	0	0	0	0	0	0	0	0	0	0	0	0	0	0	0.0144928	0
0,-2,-15	0	0	0	0.027027	0	0	0	0	0	0	0	0	0	0	0	0	0	0	0	0	0
0,2,17	0	0	0	0	0	0	0	0	0	0	0.0185185	0.030303	0	0	0	0	0	0	0	0	0
0,-2,-17	0	0.00990099	0	0	0	0	0	0	0	0	0	0	0	0	0	0	0	0	0	0	0.01
0,2,19	0	0	0	0	0	0	0	0	0	0	0	0	0	0	0.0169492	0	0	0	0	0	0
0,2,-19	0	0	0	0	0	0	0	0	0	0	0	0	0	0	0	0	0	0	0	0	0.0185185
0,-2,-19	0	0	0	0	0	0	0	0	0	0	0	0	0	0	0	0	0	0.0208333	0	0.0144928	0
0,2,2	0	0.0441176	0.0930233	0.0666667	0.0416667	0	0	0.315789	0.0442478	0	0.0925926	0.030303	0.151515	0.0263158	0	0.13986	0.0465116	0.0810811	0.0810811	0.0428571	0.0555556
0,2,-2	0.0307692	0.0441176	0.0465116	0.0333333	0.0416667	0	0	0.105263	0.0530973	0.0277778	0	0.030303	0.0606061	0	0.0847458	0.0559441	0.0930233	0	0.027027	0.128571	0.111111
0,-2,2	0.0806452	0.039604	0	0	0	0	0.047619	0	0.0230769	0.0208333	0.0568182	0.0714286	0	0	0	0.0655738	0.107692	0.0625	0.0746269	0.0434783	0.04
0,-2,-2	0.0322581	0.019802	0.075	0.0540541	0	0	0	0.0285714	0.0692308	0.0833333	0.0568182	0.0535714	0.0338983	0.0212766	0.0208333	0.0655738	0.0615385	0.0833333	0.104478	0.0144928	0.07
0,2,20	0	0	0	0	0	0	0	0	0	0	0	0	0	0	0	0	0	0.027027	0	0	0
0,-2,21	0	0	0	0	0	0	0	0	0	0	0.0113636	0	0	0	0	0.00819672	0	0.0208333	0	0	0
0,2,-22	0	0	0	0	0	0	0	0	0	0	0	0	0	0	0.0169492	0	0	0.027027	0	0	0
0,-2,-22	0	0	0	0	0	0	0	0	0.00769231	0	0	0	0	0	0	0	0	0	0	0	0
0,-2,-26	0	0	0	0	0	0	0	0	0	0	0	0	0	0	0.0208333	0	0	0	0	0	0
0,2,3	0.461538	0.470588	0.255814	0.6	0.208333	0.5	0.333333	0	0.247788	0.180556	0.277778	0.030303	0.121212	0.368421	0.0338983	0.0909091	0.0465116	0.0540541	0.0540541	0.142857	0.0555556
0,2,-3	0.0153846	0.0147059	0.0232558	0	0	0	0.0444444	0	0.0442478	0.0416667	0.037037	0.0606061	0	0.0263158	0.0508475	0.00699301	0.0697674	0	0.189189	0.0142857	0.037037
0,-2,3	0	0.0792079	0.025	0	0.0181818	0.0322581	0.0119048	0	0.0307692	0.0208333	0.0454545	0	0.0508475	0.0425532	0.145833	0.0245902	0.0615385	0.0625	0.0597015	0.0869565	0.04
0,-2,-3	0.322581	0.257426	0.225	0.297297	0.218182	0.274194	0.345238	0	0.161538	0.208333	0.227273	0.0714286	0.237288	0.297872	0.0416667	0.0655738	0.0923077	0.0625	0.0298507	0.115942	0.04
0,-2,-32	0	0	0	0	0	0	0	0	0	0.0208333	0	0	0	0	0	0	0	0	0	0	0
0,2,4	0.153846	0.132353	0.232558	0.1	0.125	0.0588235	0.177778	0.105263	0.283186	0.486111	0.203704	0.151515	0.272727	0.157895	0.237288	0.265734	0.116279	0.027027	0.108108	0.2	0.185185
0,2,-4	0	0	0	0.0333333	0.0416667	0	0.0222222	0	0.00884956	0	0	0.030303	0.030303	0.0263158	0	0.013986	0.0232558	0.0540541	0	0	0
0,-2,4	0	0	0	0	0	0.016129	0	0	0.00769231	0	0	0	0	0.0212766	0.0208333	0	0.0153846	0	0	0	0.04
0,-2,-4	0.0645161	0.19802	0.15	0.108108	0.181818	0.0322581	0.166667	0.114286	0.323077	0.291667	0.159091	0.267857	0.152542	0.0851064	0.229167	0.270492	0.215385	0.208333	0.19403	0.144928	0.24
0,2,5	0.0307692	0.0147059	0.116279	0	0.166667	0.147059	0.111111	0.105263	0.0442478	0.0555556	0.037037	0.0909091	0.181818	0.0526316	0.152542	0.0979021	0.116279	0.162162	0.0540541	0.128571	0.0740741
0,2,-5	0	0	0	0	0	0.0294118	0	0	0.0176991	0.0138889	0	0	0	0	0.0169492	0.00699301	0.0697674	0	0	0	0.0185185
0,-2,5	0.0322581	0.019802	0.025	0	0	0.016129	0	0.0285714	0.00769231	0.0208333	0.0113636	0.0178571	0	0.0212766	0.0416667	0.00819672	0.0153846	0.0208333	0.0149254	0	0
0,-2,-5	0.145161	0.108911	0.1	0.0810811	0.181818	0.241935	0.0952381	0.485714	0.0461538	0.125	0.0568182	0.142857	0.169492	0.0638298	0.145833	0.122951	0.2	0.166667	0.268657	0.231884	0.28
0,2,6	0	0	0.0232558	0	0.0416667	0	0	0	0	0	0.0185185	0	0	0	0.0847458	0	0.0232558	0.0540541	0.0810811	0.0142857	0
0,2,-6	0	0	0	0	0.0416667	0	0	0	0.00884956	0.0138889	0	0	0	0	0	0	0	0	0	0	0
0,-2,6	0	0	0	0	0	0.016129	0	0	0	0	0.0113636	0	0	0	0.0208333	0	0	0	0	0	0
0,-2,-6	0.0483871	0.00990099	0.025	0.027027	0.0181818	0.0645161	0.0238095	0.0285714	0	0.0625	0.0113636	0	0.0169492	0.0638298	0.0416667	0.0245902	0	0.0208333	0.0298507	0.0289855	0.04
0,2,7	0	0.0294118	0.0465116	0	0	0	0.0222222	0	0.00884956	0.0138889	0	0.030303	0	0.0263158	0.135593	0.041958	0.0930233	0.108108	0.027027	0.0571429	0.0555556
0,2,-7	0	0	0	0	0	0	0	0.0526316	0.00884956	0.0138889	0	0	0	0	0.0338983	0	0	0	0	0	0
0,-2,7	0	0.00990099	0	0.027027	0	0	0	0	0.00769231	0	0.0227273	0.0178571	0.0169492	0	0	0	0	0	0	0	0.01
0,-2,-7	0.112903	0.039604	0.125	0.027027	0.0363636	0.0322581	0.0833333	0.0285714	0.146154	0.0208333	0.0681818	0.0178571	0.0847458	0.0851064	0.0208333	0.0245902	0.0153846	0.0416667	0.0298507	0.0289855	0.01
0,2,8	0	0	0	0	0	0	0	0.0526316	0	0	0.0185185	0	0	0	0	0	0	0	0	0	0
0,2,-8	0	0	0	0	0	0	0	0	0	0	0	0.030303	0	0	0	0	0	0.027027	0	0	0
0,-2,8	0	0.019802	0	0	0	0.016129	0	0	0	0	0	0	0	0	0	0	0	0	0	0	0.01
0,-2,-8	0	0	0	0	0	0	0	0	0	0	0	0.0178571	0	0	0	0.00819672	0.0153846	0	0	0	0
0,2,9	0	0	0	0	0	0	0	0	0.0176991	0	0	0	0.030303	0	0.0169492	0	0	0.027027	0	0	0
0,2,-9	0.0153846	0	0	0	0	0	0	0	0	0	0	0	0	0	0	0.00699301	0	0	0	0	0
0,-2,9	0	0.00990099	0	0	0.0181818	0	0.0119048	0	0	0	0	0	0.0169492	0.0212766	0.0208333	0	0.0153846	0	0	0	0.01
0,-2,-9	0	0.00990099	0	0	0.0363636	0	0	0.142857	0	0	0	0.0178571	0.0338983	0	0	0.0327869	0	0	0.0149254	0.0144928	0
0,-20,-15	0	0	0	0	0	0	0	0	1	0	0	0	0	0	0	0	0	0	1	0	0
0,20,23	0	0	0	0	0	0	0	0	0	1	0	0	0	0	0	0	0	0	0	0	0
0,20,8	0	0	0	0	0	0	0	0	0	0	0	0	0	1	0	0	0	0	0	0	0
0,-21,-17	0	0	0	0	0	0	0	0	0	0	0	0	0	0	0	0	0	0	0	0	1
0,21,9	0	0	0	0	0	0	0	0	0	0	1	0	0	0	0	0	0	0	0	0	0
0,22,19	0	0	1	0	0	0	0	0	0	0	0	0	0	0	0	0	0	0	0	0	0
0,-22,-19	0	0	0	0	0	0	0	0	0	1	0	0	0	0	0	1	0	0	0	0	0
0,23,16	0	0	0	0	0	0	0	0	0	0	0	0	0	0	0	0	0	1	0	0	0
0,23,22	0	0	0	0	0	0	0	0	0	0	1	0	0	0	0	0	0	0	0	0	0
0,23,24	0	0	0	0	0	0	0	0	0	0	0	0	0	0	0	1	0	0	0	0	0
0,-24,-21	0	0	0	0	0	0	0	0	0	0	0	0	0	0	0.5	0	0	0	0	1	1
0,-24,-22	0	0	0	0	0	0	0	0	0	0	0	0	0	0	0.5	0	0	0	0	0	0
0,-24,-24	0	0	0	0	0	0	0	0	0	0	0	0	0	0	0	0	0	1	0	0	0
0,-25,-23	0	0	0	0	0	0	0	0	0	0	0	0	0	0	0	0	0	0	1	0	0
0,-25,-24	0	0	0	0	0	0	0	0	0	0	1	0	0	0	0	0	0	0	0	0	0
0,26,27	0	0	0	0	0	0	0	0	0	0	0	0	0	0	1	0	0	0	0	0	0
0,26,28	0	0	0	0	0	0	0	0	0	0	0	0	0	0	0	0	0	0	0	0	1
0,-27,-24	0	0	0	0	0	0	0	0	0	0	0	0	0	0	0	0	0	0	0	1	0
0,29,28	0	0	0	0	0	0	0	0	0	1	0	0	0	0	0	0	0	0	0	0	0
0,3,0	0.314815	0.12766	0.309524	0.107143	0.111111	0.227273	0.0701754	0.181818	0.184211	0.222222	0.229167	0.351351	0.05	0.097561	0.181818	0.207547	0.128205	0.269231	0.34375	0.0882353	0.175439
0,-3,0	0.0243902	0	0.142857	0	0.06	0.0493827	0.0212766	0.371429	0.0285714	0.0769231	0.216667	0.410256	0.114286	0	0.0980392	0.116667	0.0909091	0.0294118	0.0689655	0.08	0.183099
0,3,1	0.222222	0.148936	0.0714286	0.178571	0.155556	0.0454545	0.22807	0	0	0.222222	0.0416667	0	0.15	0.0243902	0.0909091	0.0566038	0.0769231	0.0384615	0.09375	0.0294118	0.0701754
0,3,-1	0	0	0	0.0714286	0.0222222	0.0151515	0.0175439	0	0	0.037037	0	0.027027	0.025	0	0	0	0	0.0384615	0	0	0.0526316
0,-3,1	0.0121951	0	0	0	0	0.0123457	0	0	0	0	0.0333333	0	0	0.0588235	0	0.0166667	0.0181818	0	0.0172414	0	0.0140845
0,-3,-1	0.121951	0.0566038	0.0204082	0.0740741	0.02	0.0493827	0.106383	0.0285714	0.142857	0	0.0166667	0.025641	0	0.0784314	0.0980392	0.0166667	0.0181818	0	0.0172414	0.02	0.084507
0,3,10	0.037037	0.0425532	0	0	0.0222222	0.0454545	0.0175439	0.136364	0	0	0	0.0540541	0	0	0.030303	0	0	0	0.03125	0.0294118	0
0,-3,10	0	0.0188679	0	0	0	0	0	0	0	0	0	0	0	0	0	0	0	0	0	0	0
0,-3,-10	0.0121951	0.0188679	0	0	0	0	0	0	0.0285714	0	0	0	0	0	0	0	0	0	0	0.02	0.0140845
0,3,11	0	0.0212766	0	0	0	0	0	0	0	0	0	0	0	0	0	0	0	0	0	0	0
0,-3,11	0	0	0	0.037037	0	0.0123457	0	0	0	0.0384615	0	0	0	0	0	0	0	0	0	0.02	0
0,3,12	0	0	0	0	0.0222222	0	0	0.0454545	0	0	0	0.027027	0	0	0	0	0	0	0	0	0
0,-3,12	0	0	0	0.037037	0	0	0	0	0	0	0	0	0	0	0	0	0	0	0	0	0
0,-3,-12	0	0	0	0	0	0	0	0	0	0	0	0	0	0	0	0.0166667	0	0.0294118	0	0.02	0
0,3,13	0	0	0	0	0	0	0	0	0	0	0.0208333	0	0	0	0	0.0188679	0	0.0384615	0	0	0
0,3,-13	0	0	0	0	0	0.0151515	0	0	0	0	0	0	0	0.0243902	0	0	0	0	0	0	0
0,-3,13	0	0	0	0	0	0	0	0	0	0	0	0	0	0	0	0	0.0181818	0	0	0	0
0,-3,-13	0	0	0	0.0740741	0	0	0	0	0	0	0	0	0	0	0	0	0	0	0	0	0
0,-3,14	0	0	0	0	0.02	0	0	0	0	0	0	0	0.0285714	0	0	0	0	0	0	0	0
0,-3,-14	0	0	0	0	0	0	0	0	0	0	0	0	0	0	0	0	0	0	0	0.02	0
0,3,15	0	0	0	0	0	0	0	0.0454545	0	0	0	0	0	0	0	0	0	0	0	0	0
0,-3,-15	0	0	0	0	0	0	0	0.0285714	0	0	0	0	0	0	0	0.0166667	0	0	0	0	0
0,3,-16	0	0	0	0	0	0	0	0	0	0	0	0	0	0	0	0.0188679	0	0	0	0	0
0,-3,16	0	0	0	0	0	0	0	0	0	0	0	0	0	0	0	0	0	0.0294118	0	0	0
0,3,-19	0	0	0	0	0	0	0	0	0	0.037037	0	0	0	0	0	0.0188679	0	0	0	0	0
0,3,2	0.12963	0.0851064	0.0714286	0.178571	0.0666667	0.0909091	0.0701754	0	0.5	0	0.145833	0.027027	0.1	0.0243902	0.0606061	0.113208	0	0.192308	0.0625	0.0882353	0.192982
0,3,-2	0.0555556	0.0212766	0.0238095	0	0	0.0454545	0.0350877	0	0.0263158	0.0740741	0.0625	0.027027	0.025	0.0243902	0.121212	0.0188679	0.102564	0.0384615	0.03125	0	0.0175439
0,-3,2	0.0121951	0.0566038	0.0204082	0	0.04	0.0246914	0.0638298	0.142857	0	0.192308	0.0333333	0.0512821	0	0.0392157	0.0784314	0.183333	0.181818	0.0882353	0.344828	0.06	0.0985915
0,-3,-2	0.439024	0.188679	0.163265	0.333333	0.12	0.234568	0.234043	0.0285714	0.285714	0.192308	0.0833333	0	0.0857143	0.0784314	0.0980392	0.0166667	0.0181818	0	0	0.06	0.056338
0,3,20	0	0	0	0	0	0	0	0	0	0	0	0	0	0	0	0	0	0	0	0	0.0175439
0,-3,-21	0	0	0	0	0	0	0	0	0	0	0	0	0	0	0	0	0	0	0	0.02	0
0,-3,23	0	0	0	0	0	0	0	0	0	0	0	0	0	0	0.0196078	0	0	0	0	0	0
0,3,3	0	0.0425532	0.0238095	0.0357143	0.0444444	0	0.0175439	0.454545	0	0	0.25	0.108108	0	0.0731707	0.030303	0.132075	0.153846	0.0769231	0	0.0588235	0.0526316
0,3,-3	0	0.0212766	0	0	0	0	0	0	0	0	0	0	0	0	0	0.0377358	0.025641	0	0	0	0.0175439
0,-3,3	0	0.0377358	0.0204082	0	0	0	0.0212766	0	0	0.0769231	0	0.025641	0.0285714	0.0196078	0	0.0333333	0.0181818	0	0.0172414	0.02	0.0140845
0,-3,-3	0	0.0754717	0	0.0740741	0.02	0	0	0.0857143	0.114286	0	0.0666667	0.0769231	0	0.0392157	0.0196078	0.133333	0.0909091	0.117647	0.0172414	0.04	0.0704225
0,3,4	0.0185185	0.106383	0	0.107143	0.0444444	0.0757576	0.105263	0	0.0263158	0.037037	0.0625	0	0.15	0.097561	0	0.0377358	0.025641	0	0	0.0294118	0
0,3,-4	0	0	0	0	0	0	0	0	0	0	0	0	0.025	0.0243902	0.0909091	0	0.0769231	0.0769231	0	0.0588235	0.0175439
0,-3,4	0	0.0566038	0.0204082	0	0.08	0.037037	0.0212766	0.0857143	0.0285714	0	0	0.0512821	0.0285714	0.0392157	0.0392157	0	0.0363636	0.147059	0.0344828	0.02	0.0704225
0,-3,-4	0.109756	0.113208	0.0408163	0.148148	0.04	0.17284	0.191489	0	0	0.0384615	0.0833333	0	0.0571429	0.156863	0.0196078	0.0833333	0.0181818	0	0.0172414	0	0.0140845
0,3,5	0	0.0425532	0.0714286	0.0357143	0.0666667	0.106061	0.0877193	0.0909091	0.0263158	0.148148	0.0208333	0.135135	0.175	0.0731707	0.181818	0.226415	0.153846	0.115385	0.21875	0.323529	0.105263
0,3,-5	0	0	0.0238095	0	0	0	0	0	0.0263158	0	0	0	0	0.0487805	0	0	0	0	0	0	0
0,-3,5	0.0365854	0.0188679	0	0	0.02	0.0246914	0	0	0	0.0384615	0	0	0	0.0588235	0	0	0.0363636	0.0294118	0.0172414	0	0
0,-3,-5	0.0487805	0.0188679	0.0612245	0.0740741	0.14	0.0864198	0.0851064	0.171429	0.314286	0.115385	0.133333	0.179487	0.2	0.0784314	0.117647	0.2	0.109091	0.0294118	0.224138	0.2	0.126761
0,3,6	0.0555556	0.170213	0.047619	0.0714286	0.177778	0.106061	0.0877193	0	0.0263158	0.037037	0.0416667	0.108108	0.05	0.292683	0.030303	0.0566038	0.102564	0	0	0.0294118	0.0350877
0,-3,6	0.0121951	0	0	0	0.04	0.0123457	0	0	0	0	0	0	0	0.0196078	0	0	0.0181818	0	0	0	0.0140845
0,-3,-6	0.0365854	0.0188679	0.0612245	0.037037	0.02	0.0864198	0.0425532	0	0.0285714	0.115385	0.0166667	0.0512821	0.0285714	0.156863	0.0588235	0.0166667	0.0545455	0.0294118	0.0862069	0.08	0.0704225
0,3,7	0.148148	0.148936	0.357143	0.214286	0.2	0.19697	0.192982	0.0454545	0.131579	0.0740741	0.0833333	0.0810811	0.225	0.0731707	0.151515	0.0377358	0.0512821	0.0769231	0.09375	0.235294	0.210526
0,3,-7	0	0	0	0	0.0222222	0	0	0	0	0	0	0	0	0	0	0	0	0	0	0	0.0175439
0,-3,7	0.0121951	0	0.0204082	0	0.04	0.037037	0	0.0285714	0	0	0.0166667	0	0.0285714	0	0	0	0	0	0	0.04	0.028169
0,-3,-7	0.0731707	0.226415	0.244898	0.111111	0.34	0.160494	0.170213	0	0.0285714	0.0769231	0.183333	0.0769231	0.342857	0.117647	0.294118	0.116667	0.2	0.382353	0.12069	0.18	0.140845
0,3,8	0.0185185	0.0212766	0	0	0.0444444	0.030303	0.0701754	0	0.0526316	0.111111	0.0416667	0.0540541	0.025	0.097561	0.030303	0	0.0769231	0	0.125	0.0294118	0
0,-3,-8	0.0365854	0.0943396	0.183673	0	0	0	0.0212766	0.0285714	0	0.0384615	0.116667	0.025641	0.0571429	0.0588235	0.0588235	0	0.0545455	0.0882353	0.0172414	0.08	0
0,3,9	0	0	0	0	0	0	0	0	0	0	0	0	0	0.0243902	0	0	0.025641	0.0384615	0	0	0
0,3,-9	0	0	0	0	0	0	0	0	0	0	0	0	0	0	0	0.0188679	0	0	0	0	0.0175439
0,-3,9	0.0121951	0	0	0	0	0	0	0	0	0	0	0.025641	0	0	0	0.0166667	0	0	0	0.02	0
0,-3,-9	0	0	0	0	0	0	0.0212766	0	0	0	0	0	0	0	0	0.0166667	0.0181818	0	0	0	0
0,-30,-28	0	0	0	0	0	0	0	0	0	1	0	0	0	0	0	0	0	0	0	0	0
0,4,0	0.137931	0	0.0689655	0.0769231	0	0.0909091	0.0277778	0.153846	0.15	0.111111	0.375	0	0.175	0.137931	0.105263	0	0.130435	0.153846	0.105263	0.047619	0.157895
0,-4,0	0	0.0222222	0.0625	0	0.047619	0.0465116	0.0434783	0.583333	0	0	0.189189	0.125	0.22	0.0769231	0.114286	0.0454545	0.0833333	0.0689655	0.15	0	0.0980392
0,4,1	0	0	0	0	0	0	0.0555556	0	0	0	0	0.0555556	0.025	0.0689655	0	0	0.0434783	0	0.0526316	0	0
0,4,-1	0.0344828	0.0555556	0	0	0	0.0606061	0.0555556	0	0	0.222222	0.0416667	0.0555556	0.025	0.0344828	0.105263	0	0	0	0	0	0.0263158
0,-4,1	0	0	0	0.130435	0	0	0.0434783	0	0	0	0.027027	0	0.16	0.025641	0	0	0	0	0.05	0.030303	0.0392157
0,-4,-1	0	0.0444444	0	0.0434783	0.0238095	0.0232558	0.130435	0	0	0.217391	0.0810811	0	0.02	0.0769231	0	0.136364	0	0.0344828	0	0.030303	0.0784314
0,-4,-10	0	0	0	0.0434783	0	0	0	0	0	0.0434783	0	0	0	0	0	0	0	0	0	0	0
0,4,11	0	0.0555556	0.0344828	0	0.0952381	0.030303	0	0	0	0	0	0.0555556	0	0.0344828	0	0	0	0.0769231	0	0.047619	0
0,-4,-11	0	0	0	0	0	0	0	0	0	0	0	0	0	0.025641	0	0	0	0	0	0	0
0,4,12	0	0	0	0	0	0	0.0277778	0	0	0	0	0	0	0	0	0	0	0.0769231	0	0	0
0,-4,-12	0	0	0.03125	0	0	0	0	0	0	0	0	0	0	0	0	0	0	0	0	0	0
0,-4,-14	0	0	0	0	0	0	0	0	0.0625	0	0	0	0	0	0	0	0	0	0	0	0
0,-4,15	0	0	0	0	0.0238095	0	0	0	0	0	0	0	0	0	0	0	0	0	0	0.030303	0
0,-4,-16	0	0	0.03125	0	0	0	0	0	0	0.0434783	0	0	0	0	0	0	0	0	0	0	0
0,4,2	0.0344828	0.111111	0.0344828	0	0.0952381	0.030303	0	0.0769231	0.3	0.222222	0.25	0.111111	0.075	0.0689655	0.473684	0.434783	0.26087	0.230769	0.473684	0.142857	0.368421
0,4,-2	0	0	0	0	0	0	0	0	0	0.111111	0	0	0	0.0344828	0.0526316	0	0	0	0.0526316	0	0
0,-4,2	0.0606061	0	0	0	0	0	0	0	0.0625	0	0	0	0	0.025641	0	0.0909091	0.0416667	0	0	0.030303	0.0392157
0,-4,-2	0.181818	0.0666667	0.125	0.0434783	0.0952381	0.0232558	0	0.0833333	0.25	0.130435	0	0.25	0.02	0.025641	0.285714	0.181818	0.125	0.413793	0.15	0.212121	0.137255
0,-4,22	0	0	0	0	0	0	0	0	0	0	0	0	0	0	0	0	0	0	0	0	0.0196078
0,4,3	0.0689655	0.0555556	0	0	0.0952381	0.181818	0.0833333	0	0.2	0.111111	0.0416667	0.0555556	0	0.137931	0.0526316	0	0.0869565	0	0.0526316	0	0.0789474
0,4,-3	0	0.0555556	0	0	0	0.030303	0	0	0	0.111111	0	0	0	0	0	0	0	0	0	0.0952381	0
0,-4,3	0	0.0222222	0	0.0869565	0	0.0232558	0.0434783	0	0	0.0869565	0	0	0.04	0.025641	0	0.0454545	0.0416667	0.0689655	0.05	0.030303	0
0,-4,-3	0.151515	0.0888889	0	0.173913	0.119048	0.0930233	0.0434783	0	0	0.0434783	0	0	0.02	0	0	0.0454545	0	0	0	0.0606061	0.0196078
0,4,4	0.0344828	0	0.0689655	0.0769231	0	0	0	0.230769	0	0	0	0.166667	0	0	0	0.173913	0.0434783	0.153846	0	0	0.0526316
0,4,-4	0	0	0	0	0	0.0606061	0	0	0	0	0	0	0.025	0.0344828	0	0	0.0434783	0	0	0	0
0,-4,4	0.030303	0	0.0625	0	0	0.0465116	0.0434783	0	0.0625	0.0434783	0	0	0	0.025641	0	0	0.0416667	0	0.05	0	0.0588235
0,-4,-4	0.0606061	0.0444444	0.0625	0.130435	0	0	0	0.0833333	0.25	0	0.0540541	0	0.02	0.0512821	0.0285714	0.0454545	0.0833333	0	0.05	0	0.0784314
0,4,5	0.0344828	0.166667	0.0689655	0.230769	0.047619	0.0606061	0.111111	0	0	0.111111	0.0416667	0	0.1	0	0.0526316	0	0.0434783	0	0.0526316	0.142857	0.0263158
0,4,-5	0	0	0	0	0	0	0	0	0	0	0	0	0.025	0.0344828	0	0	0.0434783	0	0	0	0
0,-4,5	0	0	0	0	0.047619	0.0232558	0	0	0.0625	0	0	0	0	0.025641	0.0285714	0	0	0.0344828	0.05	0.030303	0.0392157
0,-4,-5	0.181818	0.2	0.125	0.0869565	0.0952381	0.209302	0.130435	0.0833333	0	0.0434783	0.027027	0	0.12	0.25641	0.0571429	0.0909091	0	0	0	0.0606061	0.117647
0,4,6	0	0	0.0344828	0	0	0	0	0	0	0	0.0416667	0	0.025	0.0344828	0.0526316	0.26087	0.0869565	0	0.0526316	0.047619	0.0789474
0,-4,6	0	0	0	0	0	0.0465116	0	0	0	0	0	0	0	0.025641	0	0	0	0	0.05	0	0.0392157
0,-4,-6	0	0	0.03125	0	0	0	0.0869565	0.0833333	0.125	0.0869565	0.027027	0	0	0.025641	0.114286	0.181818	0.0833333	0	0.05	0.151515	0.0588235
0,4,7	0.586207	0.388889	0.62069	0.615385	0.619048	0.333333	0.527778	0.0769231	0.35	0	0.166667	0.222222	0.325	0.172414	0.105263	0.0869565	0.217391	0.153846	0.105263	0.238095	0.131579
0,4,-7	0	0	0	0	0.047619	0	0	0	0	0	0	0	0	0	0	0	0	0	0	0	0
0,-4,7	0.030303	0	0	0	0	0.0232558	0	0	0	0	0	0	0	0	0	0	0	0	0	0	0
0,-4,-7	0.212121	0.355556	0.46875	0.130435	0.47619	0.302326	0.304348	0.0833333	0.0625	0.130435	0.27027	0.625	0.26	0.128205	0.342857	0.0909091	0.375	0.344828	0.2	0.212121	0.117647
0,4,8	0.0344828	0	0.0344828	0	0	0.121212	0.0833333	0.307692	0	0	0	0.277778	0.2	0.172414	0	0	0	0.0769231	0	0.0952381	0.0263158
0,-4,8	0	0	0	0.0434783	0	0	0	0	0.0625	0	0.0810811	0	0	0	0	0.0454545	0	0	0	0	0
0,-4,-8	0.0606061	0.111111	0	0.0869565	0.047619	0.116279	0.0869565	0	0	0.130435	0.108108	0	0.1	0.128205	0	0	0	0.0344828	0.05	0.0909091	0.0392157
0,4,9	0.0344828	0.111111	0.0344828	0	0	0	0.0277778	0.153846	0	0	0.0416667	0	0	0.0344828	0	0.0434783	0	0.0769231	0.0526316	0.142857	0.0526316
0,-4,-9	0.030303	0.0444444	0	0	0.0238095	0.0232558	0.0434783	0	0	0	0.135135	0	0.02	0.0512821	0.0285714	0	0.125	0	0.1	0.030303	0.0196078
0,5,0	0	0.0769231	0.5	0.142857	0	0.176471	0.0714286	0.333333	0.0217391	0.235294	0.0526316	0.142857	0.2	0.111111	0.0384615	0.0357143	0.0833333	0	0.238095	0	0.0416667
0,-5,0	0	0.0434783	0	0	0	0.0588235	0.05	0.555556	0.309091	0.176471	0	0	0.142857	0.0967742	0.111111	0.125	0.333333	0.125	0.24	0.111111	0
0,5,1	0	0	0	0	0.25	0	0	0	0	0.235294	0	0	0.0666667	0	0.0384615	0	0.0277778	0	0.0238095	0.0769231	0.0833333
0,5,-1	0.1	0	0	0	0	0	0	0	0	0	0	0	0	0	0	0	0	0	0	0	0
0,-5,1	0	0.0434783	0	0	0	0	0	0	0	0	0	0	0	0.0645161	0	0	0	0	0	0	0
0,-5,-1	0	0.0434783	0.0434783	0.333333	0.125	0.0588235	0.1	0	0	0	0	0	0.214286	0	0.0555556	0	0.0952381	0	0	0	0.25
0,5,10	0	0.115385	0	0	0	0	0	0	0.0217391	0.0588235	0.105263	0	0	0.0740741	0.0384615	0	0	0	0.0238095	0.0769231	0
0,-5,-10	0	0.0434783	0	0	0	0	0	0.111111	0.0363636	0	0	0	0	0.0967742	0	0	0.047619	0	0	0	0
0,-5,-11	0.130435	0	0	0	0	0	0	0	0	0	0	0	0	0	0	0	0	0	0	0	0
0,5,12	0	0	0	0	0	0	0	0	0.0434783	0	0	0	0	0	0	0.0357143	0	0	0.047619	0	0
0,-5,-12	0	0	0.0434783	0	0	0	0	0	0.0363636	0	0	0.285714	0	0.0322581	0	0	0	0.125	0	0	0
0,5,13	0	0	0	0	0	0	0	0	0.23913	0	0	0	0	0	0	0	0	0	0	0.0384615	0
0,-5,13	0	0	0	0	0	0	0	0	0	0	0.030303	0	0	0	0	0	0	0	0	0	0
0,5,15	0	0	0	0	0	0	0	0	0	0	0	0	0	0	0	0.0357143	0	0	0	0	0
0,-5,15	0	0	0	0	0	0	0	0	0	0	0	0	0	0.0322581	0	0	0	0	0	0	0
0,-5,16	0	0	0	0	0	0	0	0	0	0	0.030303	0	0	0	0	0	0	0	0	0	0
0,5,17	0	0	0	0	0	0	0	0	0	0	0	0	0	0	0	0.0357143	0	0	0	0	0
0,-5,-17	0	0	0	0	0	0	0	0	0.0181818	0	0	0	0	0	0	0	0	0	0	0	0
0,5,19	0	0	0	0	0	0	0	0	0	0	0	0	0	0.037037	0	0	0	0	0	0	0
0,5,2	0.1	0.0769231	0	0.142857	0	0.235294	0.0714286	0	0.0217391	0.117647	0.157895	0.142857	0	0	0.307692	0.107143	0.194444	0.214286	0.0238095	0.0769231	0.0833333
0,5,-2	0	0.0384615	0	0	0	0	0	0	0.0217391	0.0588235	0	0	0	0.037037	0.192308	0	0.111111	0	0.0238095	0	0
0,-5,2	0.0434783	0	0.130435	0	0	0.0588235	0.05	0	0.0181818	0	0.030303	0	0	0.0322581	0	0	0.047619	0	0.04	0	0
0,-5,-2	0.0434783	0.173913	0.0869565	0	0.375	0.176471	0.2	0.111111	0	0.294118	0.030303	0.285714	0.142857	0.0645161	0.277778	0	0.142857	0	0.48	0.111111	0.375
0,5,-20	0	0	0	0	0	0	0	0	0	0	0.0526316	0	0	0	0	0	0	0	0	0	0
0,5,22	0	0	0	0	0	0	0	0	0	0	0	0	0	0.037037	0	0	0	0	0	0	0
0,5,3	0.1	0.230769	0.125	0.285714	0.375	0.176471	0.214286	0.0666667	0.130435	0.0588235	0.105263	0.428571	0.266667	0.037037	0.115385	0.178571	0.25	0.285714	0.380952	0.346154	0.375
0,5,-3	0	0	0	0	0.125	0	0	0	0	0	0	0	0	0.037037	0	0	0	0	0.0238095	0	0.0416667
0,-5,3	0	0.0434783	0	0	0	0	0	0	0	0	0	0	0	0.0322581	0	0	0	0	0	0	0
0,-5,-3	0	0	0	0	0	0	0.05	0	0.0181818	0.235294	0.151515	0.142857	0.0714286	0	0.166667	0.375	0.047619	0.25	0	0.222222	0
0,5,34	0	0	0	0	0	0	0	0	0	0.0588235	0	0	0	0	0	0	0	0	0	0	0
0,5,4	0.3	0.0384615	0	0.142857	0	0.0588235	0.285714	0	0.195652	0	0.105263	0	0.333333	0.037037	0.0384615	0	0.0555556	0.142857	0.0714286	0	0.166667
0,5,-4	0	0	0	0	0	0	0	0.0666667	0	0	0	0	0	0.037037	0	0.0714286	0	0	0	0	0
0,-5,4	0	0	0	0	0	0	0	0	0.363636	0	0	0	0	0	0	0	0	0	0.04	0	0.125
0,-5,-4	0.130435	0.0869565	0	0	0	0.176471	0	0	0	0	0.151515	0.142857	0.214286	0.0322581	0	0.125	0.047619	0	0	0	0
0,5,5	0.1	0	0	0	0.125	0.0588235	0	0.133333	0.0869565	0	0	0	0	0	0.0384615	0.321429	0.0555556	0.0714286	0.0238095	0.0769231	0.0416667
0,5,-5	0.1	0	0	0	0	0	0	0	0	0.0588235	0	0	0	0	0	0	0	0.0714286	0	0	0
0,-5,5	0	0	0	0	0	0	0	0	0	0.0588235	0	0	0.0714286	0	0	0	0	0	0.04	0	0
0,-5,-5	0.0434783	0.0434783	0	0.333333	0	0.0588235	0	0.111111	0.0363636	0	0.030303	0	0	0.0322581	0	0	0.0952381	0.125	0	0	0
0,5,6	0.1	0.0769231	0.125	0.285714	0	0	0	0.266667	0	0	0.105263	0	0	0.259259	0.0384615	0.0357143	0.0277778	0	0.0238095	0.0384615	0.0416667
0,-5,6	0	0	0	0	0	0	0	0	0.0545455	0	0	0	0	0.0322581	0	0	0	0	0	0	0
0,-5,-6	0.217391	0	0	0	0	0.117647	0.15	0	0	0	0	0	0	0.16129	0	0	0	0	0	0	0
0,5,7	0	0.115385	0.125	0	0	0.117647	0.142857	0	0.130435	0.0588235	0.105263	0	0	0.111111	0.0769231	0.0714286	0.0555556	0.0714286	0.0714286	0.0384615	0.0833333
0,-5,7	0	0.0434783	0	0	0	0	0	0	0	0	0.272727	0	0	0	0	0	0.047619	0	0.04	0	0
0,-5,-7	0.130435	0.130435	0.347826	0	0.125	0.176471	0.1	0.111111	0.0363636	0.0588235	0.0606061	0.142857	0	0.0967742	0.277778	0.125	0.0952381	0.125	0	0.333333	0
0,5,8	0.1	0.230769	0.125	0	0.125	0.176471	0.142857	0.133333	0.0217391	0.0588235	0.0526316	0	0.0666667	0.037037	0	0.0714286	0.0277778	0.142857	0	0.192308	0.0416667
0,5,-8	0	0	0	0	0	0	0	0	0	0	0	0	0	0	0	0	0	0	0	0.0384615	0
0,-5,-8	0.0434783	0.0434783	0	0	0.25	0	0.05	0	0.0545455	0.0588235	0.0606061	0	0	0.129032	0	0.125	0	0.125	0.12	0.111111	0.125
0,5,9	0	0	0	0	0	0	0.0714286	0	0.0652174	0	0.157895	0.285714	0.0666667	0.148148	0.0769231	0	0.111111	0	0.0238095	0	0
0,-5,-9	0.217391	0.26087	0.347826	0.333333	0.125	0.117647	0.25	0	0.0181818	0.117647	0.151515	0	0.142857	0.0645161	0.111111	0.125	0	0.125	0	0.111111	0.125
0,6,0	0	0.25	0	0	0	0	0	0	0	0	0	0	0	0.0869565	0	0.428571	0	0	0	0	0.111111
0,-6,0	0.2	0.25	0	0	0.333333	0	0	0	0	0	0	0	0	0.125	0	0.25	0.285714	0	0	0.5	0
0,6,1	0.166667	0	0	0	1	0	0	0	0	0	0	0	0	0	0	0.142857	0.125	0	0	0	0.111111
0,6,-1	0	0	0	0	0	0	0	0	0	0	0	0	0	0.434783	0	0	0.25	0	0	0	0
0,-6,1	0	0	0	0	0	0	0	0	0	0	0.25	0	0	0	0	0	0	0	0	0	0
0,-6,-1	0	0	0	0.5	0	0	0	0	0	0.2	0.25	0	0	0	0	0	0	0	0.5	0	0
0,6,10	0	0	0	0	0	0	0.5	0	0	0	0	0	0.5	0	0	0	0	0	0	0.142857	0
0,-6,-10	0	0	0	0	0	0	0	0	0	0	0	0	0	0	0	0.166667	0	0	0	0	0
0,6,11	0.333333	0	0	0	0	0	0	0	0	0	0	0	0	0.0434783	0	0	0	0	0	0.142857	0
0,-6,12	0	0	0	0	0	0	0	0	0	0.2	0	0	0	0	0	0	0	0	0	0	0
0,6,19	0	0	0	0	0	0	0	0	0	0	0	0	0	0	1	0	0	0	0	0	0
0,6,2	0	0	0	0	0	0	0	0	0	0.333333	0	0	0	0	0	0	0	0	0	0.285714	0.111111
0,-6,2	0	0.25	0	0	0	0	0.5	0	0.25	0.2	0	0	0	0.125	0	0.0833333	0.142857	0	0	0.5	0
0,-6,-2	0	0.25	0	0	0	0	0	0	0	0.2	0	0	0	0.125	0	0.0833333	0.142857	0	0.5	0	0.25
0,6,3	0.333333	0	0	0	0	0	0	0	0	0	0	1	0	0	0	0	0.125	0	0	0	0.111111
0,-6,3	0	0	0	0	0	0	0	0	0.5	0	0	0	0	0	0	0	0	0	0	0	0
0,-6,-3	0	0	0	0	0	0	0	0	0	0	0	0	0	0	0	0.166667	0.285714	0	0	0	0.25
0,6,4	0	0	0	0	0	0	0	0	0.25	0	0	0	0	0.0869565	0	0.142857	0	0	0.5	0	0.444444
0,6,-4	0	0	0	0	0	0	0	0	0	0	0	0	0	0.0434783	0	0	0	0	0	0	0
0,-6,4	0	0	0	0	0	0	0	0	0	0	0	0	0	0.125	0	0	0	0	0	0	0.25
0,-6,-4	0	0.25	0	0	0	0	0	0	0.25	0.2	0	0	1	0.25	0	0	0	0	0	0	0
0,6,5	0	0.5	0	0	0	0.5	0	0	0	0	0.5	0	0.5	0.0869565	0	0	0.25	1	0	0.142857	0.111111
0,-6,-5	0.2	0	0	0.5	0.333333	0	0.5	0	0	0	0	0	0	0	0	0	0	0	0	0	0
0,6,6	0.166667	0	0	0	0	0	0	0.5	0	0	0.5	0	0	0.0434783	0	0.142857	0.125	0	0	0	0
0,-6,6	0	0	0	0	0	0	0	0	0	0	0	0	0	0	0	0	0	0.5	0	0	0
0,-6,-6	0.2	0	0	0	0	0	0	0	0	0	0.25	0.666667	0	0	0	0.0833333	0	0	0	0	0
0,6,7	0	0.25	1	0	0	0.5	0	0	0.5	0.333333	0	0	0	0.130435	0	0	0	0	0	0	0
0,6,-7	0	0	0	0	0	0	0	0	0	0	0	0	0	0	0	0.142857	0	0	0	0	0
0,-6,7	0	0	0	0	0	0	0	0	0	0	0	0	0	0.125	0	0	0	0	0	0	0
0,-6,-7	0.4	0	0	0	0	0	0	0	0	0	0	0	0	0.125	1	0	0.142857	0.5	0	0	0
0,6,8	0	0	0	0	0	0	0.5	0.5	0	0	0	0	0	0.0434783	0	0	0.125	0	0.5	0.142857	0
0,6,9	0	0	0	0	0	0	0	0	0.25	0.333333	0	0	0	0	0	0	0	0	0	0.142857	0
0,-6,-9	0	0	0	0	0.333333	0	0	0	0	0	0.25	0.333333	0	0	0	0.166667	0	0	0	0	0.25
0,7,0	0	0.0909091	0	0	0.25	0.166667	0	0.538462	0.0666667	0.4	0.25	0.25	0	0.1	0	0	0.0909091	0	0.111111	0	0
0,-7,0	0.5	0	0	0	0.166667	0	0	0.0769231	0	0.166667	1	0.166667	0	0.2	0	0	0.214286	0.2	0	0.2	0.25
0,7,1	0	0	0	0	0.125	0	0	0	0	0	0	0	0	0	0	0	0	0	0	0	0
0,7,-1	0.111111	0	0	0	0	0	0	0	0	0.2	0	0	0	0	0	0	0.0909091	0	0	0	0
0,-7,1	0	0	0	0	0	0.25	0	0	0	0.166667	0	0	0	0	0	0	0	0	0	0	0
0,-7,-1	0	0	1	0	0	0	0	0	0	0	0	0	0	0.45	0	0	0	0	0.5	0	0
0,7,10	0.111111	0.0909091	0	0	0	0	0	0	0	0	0	0	0	0.1	0	0.142857	0.181818	0.166667	0	0	0
0,-7,-10	0	0	0	0	0.166667	0	0	0.0769231	0	0	0	0.333333	0	0	0	0.714286	0	0	0	0.1	0
0,7,11	0.111111	0	0	0	0	0	0	0	0	0	0	0	0	0	0	0	0	0	0	0	0
0,-7,-11	0	0.125	0	0	0	0	0	0	0	0	0	0	0	0	0	0	0	0	0	0	0
0,7,12	0	0	0.285714	0	0	0	0	0	0.0666667	0	0	0	0	0.1	0.166667	0	0	0	0	0	0
0,-7,-12	0	0	0	0	0	0	0	0	0.387097	0	0	0	0	0	0	0.142857	0	0.2	0	0	0
0,-7,-13	0	0	0	0	0	0	0	0	0	0	0	0	0	0	0	0	0	0	0	0.1	0
0,-7,-17	0	0	0	0	0	0	0	0	0.0322581	0	0	0	0	0	0	0	0	0	0	0	0
0,7,2	0	0	0	0	0	0.0833333	0	0	0.0666667	0.2	0	0	0	0	0.333333	0	0	0	0	0	0
0,7,-2	0	0	0	0	0	0	0	0	0.2	0	0	0	0	0	0	0	0	0	0	0	0
0,-7,2	0	0	0	0	0	0	0	0.461538	0.322581	0.166667	0	0.166667	0	0	0	0	0	0	0	0	0
0,-7,-2	0	0	0	0	0	0.5	0	0	0.0322581	0	0	0	0	0	0.1	0	0.142857	0.2	0	0.1	0
0,-7,-21	0	0	0	0	0	0	0	0	0	0	0	0	0	0	0	0	0	0.2	0	0	0
0,-7,-24	0	0	0	0	0	0	0	0	0.0322581	0	0	0	0	0	0	0	0	0	0	0	0
0,7,3	0	0.181818	0	0.333333	0	0	0	0	0.0666667	0	0	0.125	0.142857	0.1	0.5	0	0.181818	0.166667	0.111111	0	0.333333
0,7,-3	0.111111	0	0	0	0	0.0833333	0	0	0	0	0	0	0	0	0	0	0	0	0	0	0
0,-7,3	0	0	0	0	0	0	0	0	0	0	0	0	0	0	0.1	0	0	0	0	0	0
0,-7,-3	0	0	0	0	0.166667	0	0	0	0	0.333333	0	0.166667	0.25	0.05	0	0	0.0714286	0	0	0.1	0
0,-7,-31	0	0	0	0	0	0	0	0	0	0	0	0	0	0	0	0	0	0	0	0	0.25
0,7,4	0.333333	0.181818	0.142857	0.333333	0.125	0.25	0.285714	0	0	0	0.25	0.125	0	0.1	0	0	0.181818	0.0833333	0.222222	0.333333	0
0,-7,-4	0	0.125	0	0	0	0	0	0.0769231	0	0	0	0	0.25	0.05	0.1	0	0	0	0	0.2	0.25
0,7,5	0.111111	0.363636	0	0.333333	0	0.166667	0	0	0.0666667	0.2	0.5	0.125	0.571429	0.1	0	0.142857	0	0.5	0.222222	0.5	0.5
0,7,-5	0	0	0	0	0.125	0	0	0	0	0	0	0	0	0	0	0	0	0	0	0	0
0,-7,5	0	0	0	0	0	0	0	0	0	0	0	0	0	0	0	0	0	0	0	0.2	0
0,-7,-5	0.5	0.25	0	0	0	0	0	0	0.0967742	0.166667	0	0.166667	0.5	0.1	0.6	0.142857	0.428571	0	0.5	0	0
0,7,6	0.111111	0	0	0	0	0.166667	0.571429	0	0.0666667	0	0	0	0	0.1	0	0	0.0909091	0	0	0.166667	0.166667
0,-7,-6	0	0.375	0	1	0	0.25	0	0	0	0	0	0	0	0.15	0	0	0.0714286	0	0	0	0
0,7,7	0	0	0	0	0.25	0.0833333	0	0.153846	0.333333	0	0	0.25	0	0.1	0	0.428571	0.181818	0.0833333	0.222222	0	0
0,-7,7	0	0	0	0	0	0	0	0	0	0	0	0	0	0	0	0	0	0.2	0	0	0
0,-7,-7	0	0	0	0	0.5	0	0	0	0.0967742	0	0	0	0	0	0	0	0.0714286	0	0	0	0
0,7,8	0	0.0909091	0.571429	0	0.125	0	0.142857	0	0.0666667	0	0	0	0.285714	0.2	0	0	0	0	0	0	0
0,-7,-8	0	0.125	0	0	0	0	0	0.0769231	0	0	0	0	0	0	0	0	0	0	0	0	0.25
0,7,9	0	0	0	0	0	0	0	0.307692	0	0	0	0.125	0	0	0	0.285714	0	0	0.111111	0	0
0,-7,-9	0	0	0	0	0	0	0	0.230769	0	0	0	0	0	0	0.1	0	0	0	0	0	0
0,8,0	0.1	0.125	0	0	0	0.142857	0	0	0	0.166667	0.333333	0	0	0.181818	0	0	0.2	0	0	0	0.25
0,-8,0	0	0	0.25	0	0.142857	0	0	0	0	0	0	0	0	0.285714	0	1	0	0	0	0	0.5
0,8,1	0	0	0	0.333333	0.25	0	0	0	0.0714286	0.166667	0	0	0	0	0	0.5	0	0	0	0	0
0,8,-1	0.1	0	0	0	0	0	0	0	0	0.166667	0	0	0	0	0	0	0	0	0	0	0
0,-8,1	0	0	0	0	0	0	0	0	0.25	0	0	0	0	0	0	0	0.333333	0	0	0	0
0,-8,-1	0	0	0	0	0	0.142857	0.4	0	0.125	0	0	0	0	0	0	0	0	0	0	0	0
0,8,10	0	0	0	0	0	0.142857	0	0	0	0	0	0	0	0	0	0.5	0	0	0	0	0
0,-8,-10	0	0.333333	0.25	0	0	0	0	0	0	0	0	0	0	0	0.5	0	0	1	0	0	0
0,8,11	0	0	0	0.333333	0	0	0	0	0	0	0.333333	0	0	0	1	0	0	0	0	0	0
0,-8,-11	0	0	0	0	0	0	0	0	0	0.25	0	0	0	0	0	0	0	0	0	0	0
0,8,12	0	0	0	0	0	0	0	0	0	0	0	0	0	0	0	0	0	0	0	0.5	0
0,8,2	0	0	0	0	0	0	0	0	0.0714286	0	0	0	0	0	0	0	0	0	0	0	0
0,-8,2	0	0	0	0	0	0	0	0	0	0	0	0	0	0.142857	0.5	0	0	0	0	0	0
0,8,3	0	0	0	0	0.5	0	0.2	0	0.0714286	0.166667	0	0	0	0.272727	0	0	0.4	0.5	0	0	0
0,-8,3	0	0.333333	0	0	0	0	0	0	0	0	0	0	0	0	0	0	0	0	0	0	0
0,-8,-3	0	0.333333	0	0	0	0	0.2	0	0.125	0	0	0	0	0.142857	0	0	0	0	0	0	0
0,8,4	0.1	0.125	0	0	0	0.142857	0	0	0	0	0	0	0	0.363636	0	0	0.2	0	0	0	0
0,-8,-4	0.6	0	0	0	0.142857	0.142857	0	0	0	0	0	1	0	0	0	0	0	0	0	0	0
0,8,5	0.2	0.25	0.333333	0	0	0.428571	0	0	0	0.166667	0.333333	0	0	0	0	0	0	0	0.5	0	0.25
0,-8,-5	0.2	0	0	0.5	0.571429	0.714286	0.4	0	0	0.25	0.5	0	0	0	0	0	0.333333	0	1	0	0.5
0,8,6	0	0	0	0	0	0.142857	0	0	0	0.166667	0	0	0	0	0	0	0.2	0	0	0.5	0.5
0,-8,-6	0	0	0	0.5	0	0	0	0	0.25	0.5	0	0	1	0.142857	0	0	0	0	0	0	0
0,8,7	0	0.125	0	0	0	0	0.6	0	0.785714	0	0	0	0	0.181818	0	0	0	0.5	0	0	0
0,-8,-7	0.2	0	0.5	0	0.142857	0	0	0	0.125	0	0.5	0	0	0	0	0	0	0	0	0	0
0,8,8	0	0.25	0	0.333333	0.25	0	0	0	0	0	0	0	0	0	0	0	0	0	0.5	0	0
0,-8,-8	0	0	0	0	0	0	0	0	0.125	0	0	0	0	0.142857	0	0	0	0	0	0	0
0,8,9	0.4	0.125	0.666667	0	0	0	0.2	1	0	0	0	0	0	0	0	0	0	0	0	0	0
0,8,-9	0.1	0	0	0	0	0	0	0	0	0	0	0	0	0	0	0	0	0	0	0	0
0,-8,-9	0	0	0	0	0	0	0	0	0	0	0	0	0	0.142857	0	0	0.333333	0	0	0	0
0,9,0	0	0	0	0	0	0	0	0.428571	0.106061	0	0	0.25	0	0	0	0	0	0	0	0.444444	0
0,-9,0	0	0	0	0	1	0	0	0	0.416667	0	0	0	0	0	0	0	0	0	0	0.75	0.5
0,9,1	0	0	0	0	0.166667	0	0	0	0.0454545	0	0	0	0	0	0	0	0	0	0	0	0
0,-9,-1	0	0	0	0	0	0	0	0	0	1	0	0	0	0	0	0	0.333333	0	0	0	0
0,9,10	0	0	0	0.5	0	0	0	0	0	0	0	0	0	0	0	0	0	0	0	0	0
0,-9,-10	0	0	0	0.25	0	0	0	0	0	0	0	0	0	0	0.333333	0	0	0	0	0	0
0,9,11	0	0	0	0	0	0	0	0	0	0	0	0	0	0	0	0	0.333333	0	0	0	0
0,9,12	0	1	0	0	0	0	0	0	0	0	0	0	0	0	0	0	0	0.333333	0	0	0
0,-9,-12	0	0	0	0	0	0	0	0	0	0	0	0	0	0.25	0	0.25	0	1	0	0.125	0
0,9,2	0	0	0	0	0	0	0	0	0.121212	0	0	0	0	0	0	0	0	0	0	0	0
0,9,-2	0	0	0	0	0	0	0	0	0.318182	0	0	0	0	0	0	0	0	0	0	0	0
0,-9,-2	0	0	0	0	0	0	0	0.5	0.416667	0	0	0	0	0	0	0	0	0	0	0	0
0,9,3	0	0	0	0	0	0	0	0	0.030303	1	0	0.25	0	0	0	0	0.333333	0	0	0	0
0,9,-3	0	0	0	0	0	0	0	0	0	0	0	0	0	0	0	0	0	0	0	0.333333	0
0,-9,-3	0	0	0	0	0	0	0	0	0	0	0	0	1	0	0	0	0	0	0	0.125	0
0,9,4	0	0	0	0	0	0	0	0	0.0909091	0	0	0	0	0.2	0	0	0	0	0	0	0
0,9,-4	0	0	0	0	0	0	0	0	0.0151515	0	0	0	0	0	0	0	0	0	0	0.111111	0
0,-9,-4	0	0	0	0.25	0	0	0	0	0.0833333	0	1	0	0	0.5	0.333333	0	0.333333	0	0	0	0
0,9,5	1	0	0	0.5	0.333333	0.666667	0	0	0.0151515	0	0	0	0.666667	0.2	0	0	0	0	0.5	0	0.5
0,9,-5	0	0	0	0	0	0	0	0	0.0151515	0	0	0	0	0	0	0	0	0	0	0	0
0,-9,-5	0	0	0	0	0	0.5	0	0	0	0	0	0	0	0	0	0	0	0	0	0	0.5
0,9,6	0	0	0	0	0	0.333333	0	0	0	0	1	0	0	0.4	0	0	0	0.333333	0.5	0.111111	0
0,9,-6	0	0	0	0	0	0	0	0	0	0	0	0	0	0.2	0	0	0	0	0	0	0
0,-9,-6	0	0	0	0.25	0	0.5	0	0	0	0	0	0	0	0.25	0.333333	0.25	0.333333	0	0	0	0
0,9,7	0	0	0	0	0.166667	0	0	0.571429	0.227273	0	0	0.5	0	0	1	0	0	0.333333	0	0	0.333333
0,9,-7	0	0	0	0	0	0	0	0	0.0151515	0	0	0	0	0	0	0	0	0	0	0	0
0,-9,-7	0	0	0	0.25	0	0	0	0.333333	0	0	0	0	0	0	0	0	0	0	0	0	0
0,9,8	0	0	0	0	0.166667	0	1	0	0	0	0	0	0	0	0	0	0	0	0	0	0
0,-9,-8	1	0	0	0	0	0	0	0	0	0	0	0	0	0	0	0	0	0	0	0	0
0,9,9	0	0	0	0	0.166667	0	0	0	0	0	0	0	0.333333	0	0	0	0.333333	0	0	0	0.166667
0,-9,-9	0	0	0	0	0	0	0	0.166667	0.0833333	0	0	1	0	0	0	0.5	0	0	0	0	0

## Sheet: 3rd-order
	Evans_No1	Evans_No2	Evans_No3	Evans_No4	Evans_No5	Evans_No6	Evans_No7	Hancock_No1	Hancock_No2	Hancock_No3	Hancock_No4	Hancock_No5	Hancock_No6	Hancock_No7	Tyner_No1	Tyner_No2	Tyner_No3	Tyner_No4	Tyner_No5	Tyner_No6	Tyner_No7
0,0,0,0	0	0	0	0	0	0	0	0.125	0	0.571429	0.578947	0.5	0.5	0	0.5	0.333333	0.384615	0.333333	0.904762	0	0.222222
0,0,0,1	0	0	0	0	0	0	0	0	0.333333	0	0.105263	0	0.166667	0	0	0	0	0	0	0	0.222222
0,0,0,-1	0	0	0	0	0	0	0	0	0	0	0	0	0	0	0	0	0.0769231	0	0	1	0
0,0,0,-11	0	0	0	0	0	0	0	0	0	0	0	0	0	0.5	0	0	0.0769231	0	0	0	0
0,0,0,2	0	0.25	1	0	0	0	0	0	0.333333	0.142857	0	0	0	0	0	0.185185	0	0	0	0	0
0,0,0,-2	0	0.25	0	0	0	0	0	0	0.333333	0	0.157895	0	0	0	0	0.185185	0.153846	0.333333	0	0	0
0,0,0,-20	0	0	0	0	0	0	0	0	0	0	0	0	0	0	0	0	0	0	0.047619	0	0
0,0,0,3	0	0.25	0	0	0	0	0	0	0	0	0	0	0.166667	0	0.5	0.148148	0	0	0	0	0
0,0,0,-3	0	0	0	0	0	0	0	0.125	0	0	0.0526316	0	0	0.5	0	0.037037	0.0769231	0	0	0	0.222222
0,0,0,4	0	0	0	0	0	0	0	0.125	0	0	0	0	0	0	0	0	0	0	0	0	0
0,0,0,-4	0	0	0	0	0	0	0	0.375	0	0.142857	0.0526316	0	0	0	0	0	0	0.333333	0	0	0.111111
0,0,0,5	0	0	0	0	0	0	0	0.125	0	0	0.0526316	0.166667	0	0	0	0.037037	0.0769231	0	0	0	0
0,0,0,-5	0	0	0	0	0	0	0	0	0	0	0	0	0	0	0	0	0	0	0.047619	0	0
0,0,0,-6	0	0	0	0	0	0	0	0	0	0	0	0	0	0	0	0.037037	0.0769231	0	0	0	0.111111
0,0,0,7	0	0.25	0	0	0	0	0	0	0	0.142857	0	0	0.0833333	0	0	0.037037	0	0	0	0	0
0,0,0,-7	0	0	0	0	0	0	0	0	0	0	0	0.166667	0	0	0	0	0	0	0	0	0
0,0,0,9	0	0	0	0	0	0	0	0	0	0	0	0.166667	0.0833333	0	0	0	0	0	0	0	0
0,0,0,-9	0	0	0	0	0	0	0	0.125	0	0	0	0	0	0	0	0	0.0769231	0	0	0	0.111111
0,0,1,0	0	0.428571	0.166667	0	0	0	0	0	0	0	0.357143	0	0.5	0	0	0	0	0.333333	0	0	0.333333
0,0,-1,0	0	0	1	0	0	1	0	0	0.6	0	0.2	0	0	0.833333	0	0	0	0	0	0	0
0,0,1,1	0	0.285714	0.166667	0	0	0	0	0	0.25	0	0.142857	0	0	0.333333	0	0.333333	0	0.333333	0	0	0.333333
0,0,1,-1	0	0	0.166667	0	0	0	0	0	0.25	0	0.0714286	0	0	0	0	0	0	0	0	0	0
0,0,-1,1	0	0	0	0	0	0	0	0	0	0	0.2	0	0	0	0	0	0	0	0	0	0
0,0,-1,-1	0	0	0	0	0	0	0	0	0.2	0	0.6	0	0	0	0	0.666667	0	0	0.5	0	0
0,0,-1,-10	0	0	0	0	0	0	0	0	0	0	0	0	0	0	0	0	0	0	0	0	0.5
0,0,1,2	0	0	0.333333	0.333333	0	0	0	0	0	0	0.0714286	0	0	0.333333	0	0	0	0.333333	0	0	0.333333
0,0,1,-2	0	0	0.166667	0.333333	0	0	0	0	0	0	0	0	0	0	0	0.333333	0	0	0	0	0
0,0,-1,2	0	0	0	0	0	0	0	0	0.2	0	0	0	0	0	0	0	1	0	0	0	0.5
0,0,-1,-2	0	0	0	0	1	0	0	0	0	0	0	0	0	0.166667	0	0	0	0	0	0	0
0,0,1,3	0	0.142857	0	0	0	0	0	0	0.25	0	0.285714	0	0.25	0.333333	0	0	0	0	0	0	0
0,0,1,-3	0	0	0	0	0.5	0	0	0	0	0	0	0	0.25	0	0	0	0	0	0	0	0
0,0,-1,-3	0	0	0	0	0	0	0	0	0	0	0	1	0	0	0	0.333333	0	0	0	0	0
0,0,1,4	0	0.142857	0	0	0	1	0	0	0	0	0.0714286	0	0	0	0	0	1	0	0	0	0
0,0,1,-4	0	0	0	0.333333	0	0	0	0	0	0	0	0	0	0	0	0	0	0	0	0	0
0,0,-1,-4	0	0	0	0	0	0	0	0	0	0	0	0	0	0	0	0	0	0	0	1	0
0,0,1,5	0	0	0	0	0.5	0	1	0	0	0	0	0	0	0	0	0.333333	0	0	0	1	0
0,0,-1,-5	0	1	0	0	0	0	0	0	0	0	0	0	0	0	0	0	0	0	0	0	0
0,0,1,-7	0	0	0	0	0	0	0	0	0.25	0	0	0	0	0	0	0	0	0	0	0	0
0,0,-1,-7	0	0	0	0	0	0	0	0	0	0	0	0	0	0	0	0	0	0	0.5	0	0
0,0,-10,0	0	0	0	0	0	0	0	0	0	0	0	0	0	0	0	1	0	0	0	0	0
0,0,10,12	0	0	0	0	0	0	0	1	0	0	0	0	0	0	0	0	0	0	0	0	0
0,0,10,4	0	0	0	0	0	0	0	0	0	1	0	0	0	0	0	0	0	0	0	0	0
0,0,-11,0	0	0	0	0	0	0	0	0	0	0	0	0	0	1	0	0	0	0	0	0	0
0,0,-11,-13	0	0	0	0	0	0	0	0	0	0	0	0	0	0	0	0	1	0	0	0	0
0,0,-11,-7	0	0	0	0	0	0	0	0	0	0	0	0	0	0	0	1	0	0	0	0	0
0,0,12,12	0	0	0	0	0	0	0	0	0	0	0	0	0	0	0	0	0	0	1	0	1
0,0,-12,-12	0	0	0	0	0	0	0	0	0	0	0	0	0	0	0	0	1	0	0	0	0
0,0,-12,-14	0	0	0	0	0	0	0	0	0	1	0	0	0	1	0	0	0	0	0	0	0
0,0,-12,-3	0	0	0	0	0	0	0	0	0	0	0	0	0	0	0	0	0	0	0	1	0
0,0,-12,-7	0	0	0	0	0	0	0	1	0	0	0	0	0	0	0	0	0	0	0	0	0
0,0,12,8	0	0	0	0	0	1	0	0	0	0	0	0	0	0	0	0	0	0	0	0	0
0,0,12,9	0	0	0	0	0	0	0	0	0	0	1	0	0	0	0	0	0	0	0	0	0
0,0,13,3	0	1	0	0	0	0	0	0	0	0	0	0	0	0	0	0	0	0	0	0	0
0,0,-14,-10	0	0	0	0	0	0	0	0	0	0	0	0	0	0	0	1	0	0	0	0	0
0,0,14,12	0	0	0	0	0	0	0	0	0	0	0	0	0	0	0	0	1	0	0	0	0
0,0,15,14	0	0	0	0	0	0	0	0	1	0	0	0	0	0	0	0	0	0	0	0	0
0,0,-16,-11	0	0	0	0	0	0	0	0	1	0	0	0	0	0	0	0	0	0	0	0	0
0,0,16,15	0	0	0	0	0	0	0	0	1	0	0	0	0	0	0	0	0	0	0	0	0
0,0,-17,-15	0	0	0	0	0	0	0	0	0	0	0	0	0	0	0	0	0	0	0	0	1
0,0,17,17	0	0	0	0	0	0	0	0	0	0	0	0	0	0	1	0	0	0	0	0	0
0,0,2,0	0	0.5	0	0	0	0	0	0	0	1	0	0	0	0	0	0.192308	0	0	0	0	0
0,0,-2,0	0	0.5	0	0	0	0	0	0	0.7	0	0.666667	0	0.4	0.666667	0	0.416667	0.166667	0	0	0.5	0
0,0,2,-1	0	0	0	0	0	0	0	0	0	0	0	0	0	0	0	0.115385	0.25	0	0.2	0	0.5
0,0,-2,1	0	0	0	0.333333	0	1	0	0	0	0	0	0	0	0	0	0	0	0.25	0	0	0
0,0,-2,-1	0	0	0	0.333333	0	0	0	0.333333	0	0	0	0	0	0	0	0	0	0	0	0	0
0,0,2,-10	0	0	0	0	0	0	0	0	0	0	0	0	0	0	0	0	0	0	0.2	0	0
0,0,2,-12	0	0	0	0	0	0	0	0	0	0	0	0	0	0	0	0.0384615	0	0	0	0	0
0,0,-2,-14	0	0	0	0	0	0	0	0	0	0	0	0	0	0	0	0	0	0	0.25	0	0
0,0,-2,-17	0	0	0	0	0	0	0	0	0	0	0	0	0	0	0	0	0	0	0	0	0.5
0,0,2,2	0	0.5	0.25	0	0.333333	0	0	1	0.333333	0	0	0	0	1	0	0.230769	0.25	0.25	0.4	0	0
0,0,2,-2	0.5	0	0.25	0	0	0	0	0	0.166667	0	0	0	0	0	0	0.0769231	0.5	0	0	0	0
0,0,-2,2	0	0	0	0	0	0	0	0	0	0	0	0	0	0	0	0	0	0.25	0	0.5	0
0,0,-2,-2	0	0	0	0	0	0	0	0	0.1	0	0.166667	0	0	0	0	0.25	0.166667	0	0.25	0	0
0,0,2,20	0	0	0	0	0	0	0	0	0	0	0	0	0	0	0	0	0	0.25	0	0	0
0,0,-2,21	0	0	0	0	0	0	0	0	0	0	0.0833333	0	0	0	0	0	0	0	0	0	0
0,0,-2,-22	0	0	0	0	0	0	0	0	0.1	0	0	0	0	0	0	0	0	0	0	0	0
0,0,2,3	0	0	0.25	0	0	0	0	0	0	0	0	0	0	0	0	0.115385	0	0	0	1	0
0,0,2,-3	0	0	0	0	0	0	0	0	0	0	0	0	0	0	0	0	0	0	0.2	0	0
0,0,-2,3	0	0	0	0	0	0	0	0	0	0	0	0	0	0	0	0.0833333	0.166667	0.25	0.25	0	0
0,0,-2,-3	0	0	0.5	0.333333	0	0	1	0	0	0	0	0.166667	0.2	0.333333	0	0	0.166667	0	0	0	0
0,0,2,4	0.5	0	0.25	0	0.333333	0	0	0	0.166667	0	0	0	0	0	0	0.0769231	0	0	0	0	0.5
0,0,2,-4	0	0	0	0	0	0	0	0	0	0	0	0	0	0	0	0.0384615	0	0.25	0	0	0
0,0,-2,-4	0	0	0	0	0	0	0	0	0.1	0	0	0.833333	0	0	0	0	0.333333	0.25	0.25	0	0
0,0,2,5	0	0	0	0	0	0	0	0	0	0	0	0	0	0	0	0.115385	0	0.25	0	0	0
0,0,2,-5	0	0	0	0	0	0	0	0	0.333333	0	0	0	0	0	0	0	0	0	0	0	0
0,0,-2,5	0	0.5	0	0	0	0	0	0	0	0	0	0	0	0	0	0	0	0	0	0	0
0,0,-2,-5	0	0	0	0	1	0	0	0.666667	0	0	0.0833333	0	0.4	0	0	0.25	0	0	0	0	0.5
0,0,2,-6	0	0	0	0	0.333333	0	0	0	0	0	0	0	0	0	0	0	0	0	0	0	0
0,0,-2,-7	0	0	0.5	0	0	0	0	0	0	0	0	0	0	0	0	0	0	0	0	0	0
0,0,-20,-15	0	0	0	0	0	0	0	0	0	0	0	0	0	0	0	0	0	0	1	0	0
0,0,-21,-17	0	0	0	0	0	0	0	0	0	0	0	0	0	0	0	0	0	0	0	0	1
0,0,-27,-24	0	0	0	0	0	0	0	0	0	0	0	0	0	0	0	0	0	0	0	1	0
0,0,3,0	0.5	0	0	0	0	0	0	0.5	1	0	0	0.75	0	0	0	0.384615	0	0.333333	0.25	0	0
0,0,-3,0	0	0	0	0	0	0	0	0.818182	0	0	0	0.5	0	0	0	0.4	0.25	0	0	0.2	0.4
0,0,3,1	0	0	0	0	0	0	0	0	0	0	0	0	1	0	0	0	0	0	0.5	0	0.2
0,0,3,-1	0	0	0	0	0	0	0	0	0	0	0	0	0	0	0	0	0	0	0	0	0.2
0,0,-3,-10	0	0	0	0	0	0	0	0	0	0	0	0	0	0	0	0	0	0	0	0	0.2
0,0,-3,13	0	0	0	0	0	0	0	0	0	0	0	0	0	0	0	0	0.25	0	0	0	0
0,0,3,2	0	0	0	0	0	0	0	0	0	0	0	0	0	0	0	0.230769	0	0.666667	0	0	0.6
0,0,3,-2	0	0	0	0	0	0	0	0	0	0	0	0	0	0	0	0	0	0	0.25	0	0
0,0,-3,2	0	0	0	0	0	0	0	0	0	0	0	0	0	0	0.5	0	0.25	0	0	0	0
0,0,-3,-2	1	0	0.2	0.25	0	0	0	0	0	0	0	0	0	0	0	0	0	0	0	0	0
0,0,3,3	0	0	0	0	0	0	0	0	0	0	1	0	0	0.5	0	0.153846	0.5	0	0	0	0
0,0,3,-3	0	0	0	0	0	0	0	0	0	0	0	0	0	0	0	0.0769231	0.5	0	0	0	0
0,0,-3,3	0	0	0	0	0	0	0	0	0	0	0	0	0	0	0	0	0	0	0	0.2	0
0,0,-3,-3	0	0.5	0	0.5	0	0	0	0	1	0	0.666667	0	0	0	0	0.2	0.25	0	0	0.2	0
0,0,3,4	0	0.333333	0	0	0	1	0	0	0	0	0	0	0	0	0	0	0	0	0	0	0
0,0,-3,4	0	0	0	0	0	0	0	0	0	0	0	0	0	0	0	0	0	0	0	0	0.2
0,0,-3,-4	0	0.5	0	0.25	0	0	0	0	0	0	0.333333	0	0	0	0	0	0	0	0	0	0
0,0,3,5	0	0	0	0	1	0	0	0.5	0	0	0	0	0	0	1	0.0769231	0	0	0	0	0
0,0,-3,-5	0	0	0	0	0	0	0	0.0909091	0	0	0	0	0	0.25	0	0.4	0	0	0	0.2	0
0,0,3,6	0	0	0	0	0	0	0	0	0	0	0	0.25	0	0	0	0	0	0	0	0	0
0,0,-3,6	0	0	0	0	0	0	0	0	0	0	0	0	0	0	0	0	0	0	0	0	0.2
0,0,-3,-6	0	0	0.2	0	0	0	0	0	0	0	0	0.5	0	0.75	0	0	0	0	0	0	0
0,0,3,7	0.5	0.666667	0	0	0	0	0	0	0	0	0	0	0	0.25	0	0	0	0	0	0	0
0,0,-3,-7	0	0	0	0	1	0	0	0	0	0	0	0	0	0	0.5	0	0	0	0	0	0
0,0,3,8	0	0	0	0	0	0	0	0	0	0	0	0	0	0.25	0	0	0	0	0	0	0
0,0,-3,-8	0	0	0.6	0	0	0	0	0.0909091	0	0	0	0	0	0	0	0	0	0	0	0.2	0
0,0,3,-9	0	0	0	0	0	0	0	0	0	0	0	0	0	0	0	0.0769231	0	0	0	0	0
0,0,4,0	0	0	1	0	0	0	0	0	1	0	0	0	0	0	1	0	0	0	0	0	0.166667
0,0,-4,0	0	0.2	0	0	0.5	0	0	0.833333	0	0	0	0	0	0	0	0	0	0	0	0	0
0,0,4,1	0	0	0	0	0	0	0	0	0	0	0	0	0	0	0	0	0	0	0.5	0	0
0,0,-4,-1	0	0	0	0.2	0	0	0	0	0	0	0	0	0	0	0	0	0	0	0	0	0
0,0,-4,-16	0	0	0	0	0	0	0	0	0	0.5	0	0	0	0	0	0	0	0	0	0	0
0,0,4,2	0	0	0	0	0	0	0	0	0	0	0	0	0	0	0	0	0	0	0.5	0	0.666667
0,0,-4,2	0.25	0	0	0	0	0	0	0	1	0	0	0	0	1	0	1	0	0	0	0	0
0,0,-4,-2	0	0.2	0	0	0	0	0	0.166667	0	0	0	0	0	0	0	0	0	0	0	0	0
0,0,-4,3	0	0	0	0	0	0	0	0	0	0	0	0	0	0	0	0	0	0.333333	0	0	0
0,0,-4,-3	0	0.4	0	0.2	0	0	0	0	0	0.5	0	0	0	0	0	0	0	0	0	0	0.5
0,0,4,4	0	0	0	0	0	0	0	1	0	0	0	0	0	0	0	0	0	1	0	0	0
0,0,4,-4	0	0	0	0	0	0	0	0	0	0	0	0	0	0	0	0	1	0	0	0	0
0,0,-4,-4	0.5	0	0	0.6	0	0	0	0	0	0	0	0	0	0	0	0	0	0	0	0	0
0,0,-4,5	0	0	0	0	0	0	0	0	0	0	0	0	0	0	0	0	0	0	0	0	0.5
0,0,-4,-5	0.25	0	0	0	0	0	0	0	0	0	0	0	0	0	0	0	0	0	0	0	0
0,0,4,7	1	0	0	0	0	0	0	0	0	0	0	0	0	1	0	0	0	0	0	0	0
0,0,-4,-7	0	0.2	1	0	0.5	0	0	0	0	0	1	0	1	0	0	0	1	0.666667	0	0	0
0,0,4,9	0	0	0	0	0	0	0	0	0	0	0	0	0	0	0	1	0	0	0	0	0.166667
0,0,5,0	0	0	0	0	0	0	0	1	0	0	0	0	0	0	0	0	0	0	0	0	0
0,0,-5,0	0	0	0	0	0	0	0	0	0.25	0	0	0	0	0	0	0	0	0	1	0	0
0,0,5,10	0	0	0	0	0	0	0	0	0	0	1	0	0	0	0	0	0	0	0	0	0
0,0,5,12	0	0	0	0	0	0	0	0	1	0	0	0	0	0	0	0	0	0	0	0	0
0,0,-5,-12	0	0	0.333333	0	0	0	0	0	0	0	0	0	0	0	0	0	0	0	0	0	0
0,0,5,2	0	0	0	0	0	0	0	0	0	0	0	0.5	0	0	0	0	0	0	0	1	0
0,0,5,3	0	0	0	0	0	0	0	0	0	0	0	0.5	1	0	0	0	0.333333	0	0	0	0
0,0,-5,-3	0	0	0	0	0	0	0	0	0	0	0.166667	0	0	0	0	0	0	0	0	0	0
0,0,5,4	0	0	0	0	0	0	0	0	0	0	0	0	0	0	0	0	0.333333	0	0	0	0.75
0,0,-5,-4	0	0	0	0	0	0	0	0	0	0	0.833333	0	0	0	0	0	0	0	0	0	0
0,0,5,5	0	0	0	0	0	1	0	0	0	0	0	0	0	0	0	1	0.333333	0	0	0	0
0,0,-5,-5	0	0	0	0	0	0	0	0	0.25	0	0	0	0	0	0	0	0	0	0	0	0
0,0,5,6	0	0	0	0	0	0	0	0	0	0	0	0	0	0.5	0	0	0	0	0	0	0
0,0,-5,-6	1	0	0	0	0	0	0	0	0	0	0	0	0	0	0	0	0	0	0	0	0
0,0,5,7	0	0	0	0	0	0	0	0	0	0	0	0	0	0	0	0	0	0	0	0	0.25
0,0,-5,-7	0	0	0.333333	0	0	0	0	1	0.25	0	0	0	0	0	0	0	0	0	0	0	0
0,0,-5,-8	0	0	0	0	1	0	0	0	0	0	0	0	0	0	0	0	0	0	0	0	0
0,0,5,9	0	0	0	0	0	0	0	0	0	0	0	0	0	0.5	0	0	0	0	0	0	0
0,0,-5,-9	0	0	0.333333	0	0	0	0	0	0.25	0	0	0	0	0	0	0	0	0	0	0	0
0,0,-6,0	0	0	0	0	0	0	0	0	0	0	0	0	0	1	0	0	0.5	0	0	0	0
0,0,-6,-1	0	0	0	0	0	0	0	0	0	0	1	0	0	0	0	0	0	0	0	0	0
0,0,-6,-2	0	0	0	0	0	0	0	0	0	0	0	0	0	0	0	0	0.5	0	0	0	0.5
0,0,-6,-3	0	0	0	0	0	0	0	0	0	0	0	0	0	0	0	0.5	0	0	0	0	0
0,0,6,4	0	0	0	0	0	0	0	0	0	0	0	0	0	0	0	0	0	0	0	0	1
0,0,-6,4	0	0	0	0	0	0	0	0	0	0	0	0	0	0	0	0	0	0	0	0	0.5
0,0,-6,-4	0	1	0	0	0	0	0	0	0	0	0	0	0	0	0	0	0	0	0	0	0
0,0,-6,-6	0	0	0	0	0	0	0	0	0	0	0	0	0	0	0	0.5	0	0	0	0	0
0,0,-6,-9	0	0	0	0	1	0	0	0	0	0	0	0	0	0	0	0	0	0	0	0	0
0,0,7,0	0	0	0	0	0	0	0	1	0	0	0	0	0	0	0	0	0	0	0	0	0
0,0,-7,0	0	0	0	0	0	0	0	0	0	0	0	0.5	0	0	0	0	1	0	0	0	0
0,0,-7,-10	0	0	0	0	0	0	0	0	0	0	0	0.5	0	0	0	0	0	0	0	1	0
0,0,-7,-21	0	0	0	0	0	0	0	0	0	0	0	0	0	0	0	0	0	1	0	0	0
0,0,7,3	0	1	0	0	0	0	0	0	0	0	0	0	0	0	0	0	0	0	0	0	0
0,0,-7,-31	0	0	0	0	0	0	0	0	0	0	0	0	0	0	0	0	0	0	0	0	1
0,0,-7,-4	0	0	0	0	0	0	0	1	0	0	0	0	1	0	0	0	0	0	0	0	0
0,0,7,5	0	0	0	0	0	0	0	0	0	1	0	0	1	0	0	0	0	1	0	0	0
0,0,7,7	0	0	0	0	0	0	0	0	1	0	0	0	0	0	0	1	1	0	0	0	0
0,0,-7,-7	0	0	0	0	0	0	0	0	1	0	0	0	0	0	0	0	0	0	0	0	0
0,0,7,9	0	0	0	0	0	0	0	0	0	0	0	1	0	0	0	0	0	0	0	0	0
0,0,-7,-9	0	0	0	0	0	0	0	0	0	0	0	0	0	0	1	0	0	0	0	0	0
0,0,-8,-1	0	0	0	0	0	0	0	0	1	0	0	0	0	0	0	0	0	0	0	0	0
0,0,-8,2	0	0	0	0	0	0	0	0	0	0	0	0	0	0	1	0	0	0	0	0	0
0,0,8,4	0	0.5	0	0	0	0	0	0	0	0	0	0	0	0	0	0	0	0	0	0	0
0,0,-8,-6	0	0	0	1	0	0	0	0	0	0	0	0	0	0	0	0	0	0	0	0	0
0,0,-8,-7	0	0	0	0	0	0	0	0	0	0	1	0	0	0	0	0	0	0	0	0	0
0,0,8,8	0	0.5	0	0	0	0	0	0	0	0	0	0	0	0	0	0	0	0	0	0	0
0,0,8,9	0	0	0	0	0	0	0	1	0	0	0	0	0	0	0	0	0	0	0	0	0
0,0,9,0	0	0	0	0	0	0	0	0	0	0	0	1	0	0	0	0	0	0	0	0	0
0,0,-9,0	0	0	0	0	0	0	0	0	0	0	0	0	0	0	0	0	0	0	0	0	1
0,0,9,5	0	0	0	0	0	0	0	0	0	0	0	0	1	0	0	0	0	0	0	0	0
0,0,-9,-6	0	0	0	0	0	0	0	0	0	0	0	0	0	1	0	0	1	0	0	0	0
0,0,9,7	0	0	0	0	0	0	0	0	0	0	0	0	0	0	0	0	0	1	0	0	0
0,0,-9,-7	0	0	0	1	0	0	0	1	0	0	0	0	0	0	0	0	0	0	0	0	0
0,0,-9,-9	0	0	0	0	0	0	0	0	1	0	0	0	0	0	0	0	0	0	0	0	0
0,1,0,0	0	0.157895	0	0	0	0	0	0	0.25	0	0.142857	0	0.111111	0	0	0	0	0	0	0	0.285714
0,-1,0,0	0.047619	0	0	0	0	0	0	0	0	0	0	0	0	0	0	0	0	0	0	0	0.285714
0,1,0,1	0.142857	0.157895	0.2	0	0	0.4	0	0	0.125	0	0.0285714	0	0	0.166667	1	0.75	0.5	0	0	0.333333	0.142857
0,1,0,-1	0.0952381	0.105263	0.2	0.333333	0	0.4	0.285714	0	0.25	0	0.657143	0	0	0.0833333	0	0	0	0	0	0	0
0,-1,0,1	0	0.0909091	0	0.142857	0	0	0	0	0	0	0.130435	0	0	0.466667	0	0	0	0	0	0	0.142857
0,-1,0,-1	0.142857	0.545455	0	0.142857	0	0	0.461538	0	0.666667	0	0.73913	0	0.142857	0.0666667	0.428571	0	0.666667	0	0	0	0.142857
0,-1,0,10	0	0	0	0	0	0	0	0	0	0	0.0434783	0	0	0	0	0	0	0	0	0	0
0,-1,0,11	0.047619	0	0	0	0	0	0	0	0	0	0	0	0	0	0	0	0	0	0	0	0
0,-1,0,12	0	0	0	0	0.5	0	0	0	0	0	0	0	0	0	0	0	0	0	0	0	0
0,-1,0,-12	0.047619	0	0	0	0	0	0	0	0	0	0	0	0	0	0	0	0	0	0	0	0
0,1,0,2	0.0952381	0	0	0	0	0	0	0	0	0	0	0	0	0	0	0	0	0	0	0.333333	0
0,1,0,-2	0.142857	0.157895	0.4	0.333333	0	0.1	0.642857	1	0.25	0.666667	0.0857143	1	0.222222	0.0833333	0	0	0	0	0	0.333333	0.285714
0,-1,0,2	0.0952381	0.181818	0	0.428571	0	0.5	0.153846	0	0.333333	0	0	0	0	0.133333	0.142857	1	0	1	0	0.5	0.285714
0,1,0,3	0.380952	0	0	0	0	0	0	0	0	0.333333	0.0571429	0	0	0	0	0	0	0	0	0	0.285714
0,1,0,-3	0	0.105263	0	0	0	0	0.0714286	0	0.125	0	0.0285714	0	0.222222	0.166667	0	0.25	0	0	0	0	0
0,-1,0,3	0.142857	0	0.166667	0	0	0.125	0.0769231	0	0	1	0	0	0.142857	0	0.285714	0	0.333333	0	0	0	0
0,-1,0,-3	0.333333	0	0.333333	0.142857	0	0.25	0.0769231	0	0	0	0.0434783	0	0	0	0.142857	0	0	0	0	0	0
0,1,0,-4	0	0.105263	0.2	0	0	0	0	0	0	0	0	0	0.333333	0.25	0	0	0	1	0	0	0
0,-1,0,4	0.047619	0	0.333333	0.142857	0.5	0.125	0.230769	0	0	0	0	0	0.714286	0.0666667	0	0	0	0	0	0	0
0,-1,0,-4	0	0.0909091	0	0	0	0	0	0	0	0	0	0	0	0	0	0	0	0	0	0.25	0.142857
0,1,0,5	0	0.0526316	0	0	0	0	0	0	0	0	0	0	0	0	0	0	0	0	0	0	0
0,1,0,-5	0.047619	0.0526316	0	0	0	0	0	0	0	0	0	0	0	0.166667	0	0	0	0	0	0	0
0,-1,0,5	0	0	0	0	0	0	0	0	0	0	0	0	0	0.133333	0	0	0	0	0	0	0
0,-1,0,-5	0.047619	0.0909091	0	0	0	0	0	0	0	0	0	0	0	0	0	0	0	0	0	0.25	0
0,1,0,6	0.047619	0	0	0	0	0.1	0	0	0	0	0	0	0	0	0	0	0	0	0	0	0
0,1,0,-6	0	0	0	0	0	0	0	0	0	0	0	0	0	0.0833333	0	0	0	0	0	0	0
0,-1,0,6	0	0	0	0	0	0	0	0	0	0	0	0	0	0.0666667	0	0	0	0	0	0	0
0,1,0,-7	0	0.0526316	0	0	0	0	0	0	0	0	0	0	0	0	0	0	0	0	0	0	0
0,-1,0,7	0.047619	0	0	0	0	0	0	0	0	0	0	0	0	0	0	0	0	0	0	0	0
0,1,0,8	0.047619	0	0	0	0	0	0	0	0	0	0	0	0	0	0	0	0	0	0	0	0
0,1,0,-8	0	0.0526316	0	0	0	0	0	0	0	0	0	0	0	0	0	0	0	0	0	0	0
0,-1,0,8	0	0	0	0	0	0	0	0	0	0	0.0434783	0	0	0	0	0	0	0	0	0	0
0,-1,0,-8	0	0	0.166667	0	0	0	0	0	0	0	0	0	0	0	0	0	0	0	0	0	0
0,1,0,9	0	0	0	0	0	0	0	0	0	0	0	0	0.111111	0	0	0	0.5	0	0	0	0
0,1,0,-9	0	0	0	0.333333	0	0	0	0	0	0	0	0	0	0	0	0	0	0	0	0	0
0,-1,0,9	0	0	0	0	0	0	0	0	0	0	0	0	0	0.0666667	0	0	0	0	0	0	0
0,1,1,0	0	0.142857	0.111111	0	0	0	0	0	0	0	0	0	0	0.454545	0	0.666667	0	0	0	0	0
0,1,-1,0	0.5	0.333333	0.666667	0.285714	0.2	0	0	0	0	0	0.5	0	0	0	0	0	0	0	0	0	0
0,-1,1,0	0.5	0	0	0	0	0	0	0	0	0	0.571429	0	0	0	0	0	0	0	0	0	0
0,-1,-1,0	0	0.5	1	1	1	0	1	0	0	0	0.4	0	0.2	0	0	0	0	0	0	0	0
0,1,1,1	0	0.142857	0.111111	0	0	0	0	0	0	0	0.5	0	0.333333	0	0	0	0	0	0	0	1
0,1,1,-1	0	0	0	0	0	0	0	0	0	0	0	0	0	0.0909091	0	0	0	0	0	0	0
0,1,-1,1	0	0	0	0.142857	0.4	0.5	0	0	0	0	0	0	0	0	0	0	0	0	0	0	0
0,1,-1,-1	0	0	0	0	0	0	0	0	0	0	0.25	0	0	0	0	0	0	0	0	0	0
0,-1,1,1	0	0	0	0	0	0	0	0	0	0	0.142857	0	0	0	0	0	0	0	0	0	0
0,-1,1,-1	0	0	0	0	0	0.5	0	0	1	0	0.142857	0	0	0	0	1	0	0	0	0	0
0,-1,-1,1	0	0	0	0	0	0	0	0	0.25	0	0	0	0	0	0	0	0	0	0	0	0.166667
0,-1,-1,-1	0	0	0	0	0	0	0	0	0.25	1	0.1	0	0.4	0	0	0.5	0	0	0	0	0
0,1,1,11	0	0	0	0	0	0	0	0	0	1	0	0	0	0	0	0	0	0	0	0	0
0,-1,-1,-12	0	0	0	0	0	0	0	0	0	0	0	0	0	0	0	0.25	0	0	0	0	0
0,1,1,13	0	0	0	0	0	0.5	0	0	0	0	0	0	0	0	0	0	0	0	0	0	0
0,-1,1,-16	0	0	0	0	0	0	0	0	0	0	0.142857	0	0	0	0	0	0	0	0	0	0
0,1,1,2	0	0	0	0.333333	0	0.5	0	0	0	0	0	0	0.333333	0	0	0	0	0	0	0	0
0,1,1,-2	0	0.142857	0.333333	0	0	0	0	0	0	0	0	0	0	0.0909091	1	0	0	0	0	0	0
0,1,-1,-2	0.5	0.333333	0.333333	0.142857	0	0.25	0	0	0	0	0	0	0	1	0	0	0	0	0	0	0
0,-1,1,-2	0.5	0	0	0	0	0	0	0	0	0	0	0	0	0	0	0	0	0	0	1	0
0,-1,-1,2	0.5	0	0	0	0	0	0	0	0	0	0	0	0	1	0	0	0	0	1	0	0.333333
0,-1,-1,-2	0	0	0	0	0	1	0	0	0	0	0.2	0	0	0	0	0	0	0	0	0	0.166667
0,-1,-1,-22	0	0	0	0	0	0	0	0	0	0	0	0	0	0	0	0	0	0	0	0	0.166667
0,1,1,3	0	0.285714	0	0	1	0	0	0	1	0	0	0	0	0.0909091	0	0.333333	0	1	0	1	0
0,1,1,-3	0.5	0.285714	0.111111	0	0	0	0	0	0	0	0	0	0.333333	0	0	0	0	0	0	0	0
0,1,-1,-3	0	0	0	0.285714	0.2	0.25	0.333333	0	1	0	0	0	1	0	0	1	1	0	0	0	0
0,-1,1,3	0	0	0.5	0	0	0	0	0	0	0	0	0	0	0	1	0	0	0	0	0	0
0,-1,-1,3	0	0	0	0	0	0	0	0	0	0	0	0	0	0	0	0.25	0	0	0	0	0
0,-1,-1,-3	0	0	0	0	0	0	0	0	0.5	0	0.3	1	0	0	0	0	0	0	0	0	0
0,1,1,4	0	0	0	0	0	0	0	0	0	0	0.5	0	0	0.0909091	0	0	0	0	0	0	0
0,1,1,-4	0	0	0.333333	0	0	0	0	0	0	0	0	0	0	0	0	0	0	0	0	0	0
0,1,-1,4	0	0	0	0	0	0	0.333333	0	0	0	0.25	0	0	0	0	0	0	0	0	0	0
0,1,-1,-4	0	0	0	0.142857	0.2	0	0	0	0	0	0	0	0	0	0	0	0	0	0	0	0
0,-1,1,4	0	0	0	0	0	0	0	0	0	0	0	0	0	0	0	0	1	0	0	0	0
0,-1,-1,4	0	0	0	0	0	0	0	0	0	0	0	0	0	0	0	0	0	0	0	0	0.166667
0,-1,-1,-4	0.5	0.166667	0	0	0	0	0	0	0	0	0	0	0	0	0	0	0	0	0	0	0
0,1,1,5	0.5	0	0	0	0	0	0	0	0	0	0	0	0	0	0	0	0	0	0	0	0
0,-1,1,5	0	0	0.5	0	0	0	0	0	0	0	0	0	0	0	0	0	0	0	0	0	0
0,-1,1,-5	0	0	0	0	0	0	0	0	0	0	0	0	1	0	0	0	0	0	0	0	0
0,-1,-1,-5	0	0.333333	0	0	0	0	0	0	0	0	0	0	0	0	0	0	0	1	0	0	0
0,1,1,6	0	0	0	0	0	0	0	0	0	0	0	0	0	0.0909091	0	0	0	0	0	0	0
0,1,-1,-6	0	0.333333	0	0	0	0	0.333333	0	0	0	0	0	0	0	0	0	0	0	0	0	0
0,-1,1,-6	0	0	0	0	0	0.5	0	0	0	0	0	0	0	0	0	0	0	0	0	0	0
0,-1,-1,6	0	0	0	0	0	0	0	0	0	0	0	0	0.2	0	0	0	0	0	0	0	0
0,1,1,-7	0	0	0	0.333333	0	0	0	0	0	0	0	0	0	0	0	0	0	0	0	0	0
0,1,1,-8	0	0	0	0.333333	0	0	0	0	0	0	0	0	0	0.0909091	0	0	0	0	0	0	0
0,-1,-1,-8	0	0	0	0	0	0	0	0	0	0	0	0	0.2	0	0	0	0	0	0	0	0
0,-1,-10,-11	0	0	0	1	0	0	0	0	0	0	0	0	0	0	0	0	0	0	0	0	0
0,-1,10,4	0	0	0	0	0	0	0	0	0	0	0	0	0	0	0	1	0	0	0	0	0
0,-1,-10,-5	0	0	0	0	0	0	0	0	0	0	1	0	0	0	0	0	0	0	0	0	0
0,1,-10,-6	0	0	0	0	0	0	0	0	0	0	0	0	1	0	0	0	0	0	0	0	0
0,-1,10,6	0	0	0	0	0	1	0	0	0	0	0	0	0	0	0	0	0	0	0	0	0
0,-1,-10,-6	0	0	0	0	0	0	0	0	0	0	0	0	0	0	0	0	0	0	0	0	1
0,1,10,7	0	0	0	0	0	0	0	0	0	0	0	0	0	1	0	0	0	0	0	0	0
0,-1,10,7	0	0	0	0	0	0	0	0	0	0	0	0	0	1	0	0	0	0	0	0	0
0,-1,-10,-7	0	0	0	0	0	1	0	0	0	0	0	0	0	0	0	0	0	0	0	0	0
0,1,10,9	0	0	0	0	0	0	1	0	0	0	0	0	0	0	0	0	0	0	0	0	0
0,-1,11,10	0	0	0	0	0	1	0	0	0	0	0	0	0	0	0	0	0	0	0	0	0
0,1,11,11	0	0	0	0	0	0	0	0	0	0	1	0	0	0	0	0	0	0	0	0	0
0,-1,11,11	0	0	0	0	0	0	0	0	0	0	1	0	0	0	0	0	0	0	0	0	0
0,1,-11,2	1	0	0	0	0	0	0	0	0	0	0	0	0	0	0	0	0	0	0	0	0
0,1,11,20	0	0	0	0	0	0	0	0	1	0	0	0	0	0	0	0	0	0	0	0	0
0,1,-11,-7	0	0	0	0	0	0	0	0	0	0	0	0	0	0	0	0	0	0	0	1	0
0,-1,11,7	0	0	0	0	1	0	0	0	0	0	0	0	0	0	0	0	0	0	0	0	0
0,1,11,8	1	0	0	0	1	0	0	0	0	0	0	0	0	0	0	0	0	0	0	0	0
0,1,12,10	0	0.5	0	0	0	1	0	0	0	0	0	0	0	0	0	0	0	0	0	0	0
0,1,12,13	1	0	0	0	0	0	0	0	0	0	0	0	0	0	0	0	0	0	0	0	0
0,-1,-12,-15	0	0	0	0	0	0	0	0	0	0	0	0	0	1	0	0	0	0	0	0	0
0,1,12,8	0	0.5	0	0	0	0	0	0	0	0	0	0	0	0	0	0	0	0	0	0	0
0,1,13,11	0	0	0	0	0.5	0	1	0	0	0	0	0	0	0	0	0	0	0	0	0	0
0,1,-13,-12	1	0	0	0	0	0	0	0	0	0	0	0	0	0	0	0	0	0	0	0	0
0,1,13,2	0	0	0	0	0.5	0	0	0	0	0	0	0	0	0	0	0	0	0	0	0	0
0,1,13,7	0	0	0	0	0	0	0	0	0	0	1	0	0	0	0	0	0	0	0	0	0
0,-1,-13,-8	0	0	0	0	0	0	0	0	1	0	0	0	0	0	0	0	0	0	0	0	0
0,-1,13,9	0	0	0	0	1	0	0	0	0	0	0	0	0	0	0	0	0	0	0	0	0
0,-1,-14,-14	0	0	0	0	0	0	0	0	0	0	0	0	0	0	0	0	0	0	0	0	1
0,1,-14,-16	0	0	0	0	0	0	0	0	0	0	0	0	0	0	0	0	0	0	0	1	0
0,1,15,15	0	0	1	0	0	0	0	0	0	0	0	0	0	0	0	0	0	0	0	0	0
0,1,-15,-7	0	0	0	1	0	0	0	0	0	0	0	0	0	0	0	0	0	0	0	0	0
0,1,17,12	0	0	0	0	0	0	0	0	0	0	0	0	1	0	0	0	0	0	0	0	0
0,1,-18,-16	0	0	0	0	0	0	0	0	0	0	0	0	0	0	0	1	0	0	0	0	0
0,1,18,18	0	0	0	0	0	0	0	0	0	0	0	0	0	0	0	0	0	0	0	0	1
0,1,2,0	0	0	0	0	0.3	0	0	0	0	0	0.04	0	0	0	0	0	0	0	0	0	0
0,1,-2,0	0.263158	0	0	0.166667	0	0	0.166667	1	0.5	0	0	0	0	0.6	0.571429	0	0	0	0	0	0.5
0,-1,2,0	0.0833333	0.666667	0.5	0	1	0.125	0.125	0	0	0	0	0	0	0	0	0	0	0	0	0	0.1
0,-1,-2,0	0	0	0	0	0	0.0215054	0	0	0	0	0	0	0.0625	0	0	0	0	0	0	0	0
0,1,2,1	0.0714286	0.111111	0.25	0.0555556	0	0.111111	0	0	1	0	0.2	0	0	0.153846	0	0	0	0	0	0	0.333333
0,1,2,-1	0.142857	0	0.25	0	0	0.148148	0.166667	0	0	0.333333	0	0	0	0.0769231	0	0	0	0	0	0	0
0,1,-2,1	0.0526316	0	0	0	0	0	0	0	0	0	0.333333	0	0	0	0	0	0	0	0	0	0
0,1,-2,-1	0.0526316	0	0	0.166667	0	0	0	0	0.333333	0	0.333333	0	0	0	0	0.5	0	0	0	0	0
0,-1,2,1	0.0833333	0	0	0	0	0.125	0	0	0.888889	0	0	0	0	0	0	0	0	0	0.5	0	0.1
0,-1,2,-1	0.583333	0	0.5	0.5	0	0.25	0.125	0	0.0555556	0.333333	0.333333	0	0	0.4	0	0	0	0.25	0.5	0	0.3
0,-1,-2,1	0	0.0344828	0	0	0	0.0537634	0.02	0	0.313725	0	0	0	0	0.136364	0	0	0	0	0	0	0
0,-1,-2,-1	0	0.0689655	0.25	0.125	0	0.0107527	0.04	0	0	0	0.355932	0	0	0.136364	0	0	0	0	0	0	1
0,1,2,10	0	0	0	0	0.1	0	0	0	0	0	0	0	0	0	0	0	0	0	0	0	0
0,1,-2,10	0.0526316	0	0	0	0	0	0	0	0	0	0	0	0	0	0	0	0	0	0	0	0
0,-1,-2,10	0	0	0	0	0.2	0.0107527	0	0	0	0	0.0169492	0	0	0	0	0	0	0	0	0	0
0,-1,-2,-10	0	0	0	0.0625	0	0.0107527	0.04	0	0	0	0	0	0	0	0	0	0	0	0	0	0
0,1,2,12	0.0714286	0	0	0	0	0	0	0	0	0	0	0	0	0	0	0	0	0	0	0	0
0,-1,2,12	0	0	0	0	0	0	0	0	0	0	0	0	0	0	0	0	0	0.25	0	0	0
0,-1,-2,12	0	0	0	0	0.2	0	0	0	0	0	0	0	0	0	0	0	0	0	0	0	0
0,1,2,14	0	0	0	0	0	0	0.166667	0	0	0	0	0	0	0	0	0	0	0	0	0	0
0,-1,2,19	0	0	0	0	0	0	0	0	0	0	0	0	0	0	0	0	0	0	0	0	0.1
0,1,2,2	0	0.0555556	0	0.0555556	0	0	0	0	0	0	0	0	0.166667	0.461538	0	0	0	0	0	0	0
0,1,2,-2	0	0	0.5	0.0555556	0	0.037037	0	0	0	0	0	0	0.333333	0	1	0	0	0	0	0	0
0,-1,2,2	0	0.333333	0	0	0	0	0.125	0	0	0	0	0	0	0	0	0.333333	0.5	0.25	0	0	0.1
0,-1,-2,2	0.05	0	0	0.0625	0	0.0322581	0.04	0	0.117647	0.181818	0.0169492	0	0	0.0454545	0	0	0	0	0	0	0
0,-1,-2,-2	0.1	0	0.25	0	0	0	0.02	0	0.0196078	0	0.0338983	0	0.0625	0	0	0	0	0	0	0	0
0,1,-2,24	0	0	0	0	0	0	0	0	0	0	0	0	0	0	0.142857	0	0	0	0	0	0
0,1,2,3	0.285714	0.555556	0	0.388889	0.4	0.444444	0.166667	0	0	0.333333	0.32	0	0.5	0.153846	0	0	0	0	0	0	0.333333
0,1,2,-3	0	0	0	0	0	0	0	0	0	0	0.04	0	0	0	0	0	0	0	0	0	0
0,1,-2,3	0	0	0	0	0	0	0	0	0	0	0	0	0	0.2	0	0	1	0	0.5	0	0
0,1,-2,-3	0.263158	0.75	0.25	0.333333	0	0.857143	0.666667	0	0	0	0.333333	0	0	0	0	0	0	0	0	0	0
0,-1,2,3	0	0	0	0	0	0	0.25	0	0	0	0.333333	0	0	0	0	0.333333	0	0	0	0	0
0,-1,2,-3	0.25	0	0	0	0	0	0	0	0.0555556	0.333333	0	1	0	0	0	0	0	0	0	0	0
0,-1,-2,3	0.05	0	0	0	0	0.0107527	0.02	0	0.0392157	0	0	0	0	0	0	0	0	0	0	0	0
0,-1,-2,-3	0.45	0.62069	0.5	0.375	0.4	0.645161	0.48	0	0.392157	0.636364	0.474576	0	0.5	0.363636	0	0	0.25	0	0	0	0
0,1,2,4	0.214286	0.111111	0	0.0555556	0	0	0.166667	0	0	0.333333	0.04	0	0	0.0769231	0	0	0	0	0	0	0.333333
0,1,2,-4	0	0	0	0	0	0	0	0	0	0	0.04	0	0	0	0	0	0	0	0	0	0
0,1,-2,-4	0	0	0	0.166667	0	0	0.166667	0	0.166667	0	0	0	0	0	0	0	0	0	0	0	0
0,-1,2,4	0	0	0	0	0	0.125	0	0	0	0	0	0	1	0	0	0	0	0.25	0	0	0
0,-1,-2,4	0	0	0	0	0	0	0	0	0.0196078	0	0	0	0	0	0	0	0.25	0	0	0	0
0,-1,-2,-4	0.15	0.206897	0	0.125	0	0.107527	0.16	0	0.0784314	0.0909091	0.0847458	0	0.3125	0.136364	0	0.666667	0.25	0	0	0	0
0,1,2,5	0.142857	0.0555556	0	0.166667	0.1	0.222222	0.166667	0	0	0	0.32	0	0	0	0	0	0	1	0	0.5	0
0,1,2,-5	0.0714286	0.0555556	0	0	0	0	0	0	0	0	0	0	0	0	0	0	0	0	0	0	0
0,1,-2,-5	0.0526316	0	0.25	0.166667	0	0	0	0	0	0	0	0	0.5	0	0.142857	0	0	0	0	0	0
0,-1,2,5	0	0	0	0.5	0	0.125	0.25	0	0	0	0.333333	0	0	0.2	0	0.333333	0.5	0	0	0	0.1
0,-1,2,-5	0	0	0	0	0	0	0	0	0	0	0	0	0	0	1	0	0	0	0	0	0.1
0,-1,-2,5	0	0	0	0	0	0	0	0	0.0196078	0	0	0	0	0	0	0.333333	0.25	0	0	0	0
0,-1,-2,-5	0.2	0.0689655	0	0.1875	0.2	0.0537634	0.14	0	0	0	0.0169492	0	0.0625	0.0454545	0	0	0	0	0	0	0
0,1,2,6	0	0	0	0.0555556	0	0.037037	0	0	0	0	0	0	0	0.0769231	0	0	0	0	0	0.5	0
0,1,-2,6	0.105263	0	0	0	0	0	0	0	0	0	0	0	0	0	0	0	0	0	0	0	0
0,1,-2,-6	0.105263	0.25	0	0	1	0.142857	0	0	0	1	0	0	0.5	0.2	0	0	0	0	0.5	0	0.5
0,-1,2,6	0	0	0	0	0	0	0.125	0	0	0	0	0	0	0	0	0	0	0	0	0	0.1
0,-1,2,-6	0	0	0	0	0	0	0	0	0	0	0	0	0	0.2	0	0	0	0	0	0	0
0,-1,-2,6	0	0	0	0.0625	0	0	0	0	0	0	0	0	0	0.0909091	0	0	0	0	0	0	0
0,-1,-2,-6	0	0	0	0	0	0.0215054	0.04	0	0	0.0909091	0	0	0	0.0454545	0	0	0	0	0	0	0
0,1,2,7	0	0.0555556	0	0.111111	0.1	0	0.166667	0	0	0	0	0	0	0	0	0	0	0	0	0	0
0,1,2,-7	0	0	0	0.0555556	0	0	0	0	0	0	0	0	0	0	0	0	0	0	0	0	0
0,1,-2,-7	0.0526316	0	0.5	0	0	0	0	0	0	0	0	0	0	0	0.142857	0	0	0	0	0	0
0,-1,2,7	0	0	0	0	0	0.125	0	0	0	0.333333	0	0	0	0.2	0	0	0	0	0	0	0
0,-1,-2,-7	0	0	0	0	0	0.0107527	0	0	0	0	0	0	0	0	0	0	0	0	0	0	0
0,1,-2,-8	0	0	0	0	0	0	0	0	0	0	0	0	0	0	0	0.5	0	0	0	0	0
0,-1,-2,8	0	0	0	0	0	0.0107527	0	0	0	0	0	0	0	0	0	0	0	0	0	0	0
0,-1,2,9	0	0	0	0	0	0.125	0	0	0	0	0	0	0	0	0	0	0	0	0	0	0
0,1,20,17	1	0	0	0	0	0	0	0	0	0	0	0	0	0	0	0	0	0	0	0	0
0,1,23,20	0	0	1	0	0	0	0	0	0	0	0	0	0	0	0	0	0	0	0	0	0
0,1,-23,-20	0	0	0	0	0	0	0	0	0	0	0	0	0	0	0	0	0	0	0	1	0
0,-1,-26,-24	0	0	0	0	0	0	0	0	0	0	0	0	0	0	0	0	0	0	1	0	0
0,1,3,0	0.0322581	0	0.0769231	0.0625	0	0.153846	0	0	0.0645161	0.133333	0.0666667	0	0	0.111111	0	0.111111	0	0	1	0	0
0,1,-3,0	0	0	0	0	0	0	1	0	0	0	0	0	0	0.5	0	0	0	0	0	0	0
0,-1,3,0	0	0	0	0	0	0	0	0	0	0	0	0	0	0.25	0	0	0	0	0	0	0
0,-1,-3,0	0	0	0	0.222222	0	0	0	0	0	0	0.166667	0.25	0.133333	0.0714286	0	0	0	0	0	0	0.1
0,1,3,1	0.0322581	0.0967742	0.153846	0.0625	0.5	0.0769231	0.1875	0	0.0322581	0	0	0	0.25	0.111111	0	0.333333	0	0.5	0	0.2	0.25
0,1,3,-1	0	0.0322581	0	0	0	0	0	0	0	0	0	0	0	0	0	0.111111	0	0	0	0	0
0,1,-3,1	0	0	0	0	0	0.166667	0	0	0	0	0	0	0.166667	0.25	0	0	0	0	0	0	0.25
0,1,-3,-1	0	0	0	0	0.2	0	0	0	0	0	0	0	0	0	0	0	0	0	0	0	0.25
0,-1,3,1	0	0	0	0	0	0	0	0	0.666667	0	0.5	0	0	0.25	0	1	0	0	0	0	0
0,-1,3,-1	0	0	0	0	0	0	0	0	0	0	0	0	0	0	0	0	0	0	0	0	0.333333
0,-1,-3,1	0	0	0	0	0	0	0	0	0.133333	0	0.166667	0	0	0	0	0	0.166667	0	0	0	0
0,-1,-3,-1	0.047619	0.0909091	0	0.222222	0.0833333	0	0.129032	0	0.133333	0	0.0333333	0.25	0.0666667	0	0	0.111111	0.166667	0	0	0	0.2
0,1,3,10	0	0	0	0	0	0	0	0	0.0322581	0	0	0	0	0	0	0	0	0	0	0	0
0,-1,-3,10	0	0.030303	0	0	0.0833333	0.0416667	0	0	0	0	0	0	0	0	0	0	0	0	0	0	0
0,-1,3,11	0	0	0	0	0	0	0.5	0	0	0	0	0	0	0	0	0	0	0	0	0	0
0,-1,-3,-11	0	0	0	0	0	0	0	0	0	0	0	0	0	0	0	0.111111	0	0	0	0	0
0,1,3,-12	0	0.0322581	0	0	0	0	0	0	0	0	0	0	0	0	0	0	0	0	0	0	0
0,-1,-3,-12	0	0	0	0	0	0	0	0	0	0	0	0	0	0	0	0	0.166667	0	0	0	0
0,-1,-3,-16	0	0	0	0.111111	0	0	0	0	0	0	0	0	0	0	0	0	0	0	0	0	0
0,1,3,-18	0	0	0	0	0	0	0	0	0	0	0	0	0	0	0	0	0	0	0	0	0.25
0,1,3,2	0	0	0	0	0	0	0	0	0.0322581	0.0666667	0.133333	0	0	0	0	0	0	0	0	0	0.25
0,1,3,-2	0	0	0	0	0	0	0	0	0.16129	0	0.0666667	0	0	0	0	0	0	0	0	0	0
0,1,-3,-2	0.5	0	0	0.6	0.6	0.166667	0	0	0	0	0	0	0.166667	0	0	0	0	0	0	1	0
0,-1,3,2	0	0	0	0	0	0	0	0	0.166667	0	0	0	0	0	0	0	0	0	0	0	0.333333
0,-1,3,-2	0	0	0	0	0	0.666667	0.5	0	0	0.666667	0.5	0	0	0.25	0	0	0	0	0	0	0
0,-1,-3,2	0	0.151515	0	0	0	0.0416667	0	0	0.133333	0	0.0333333	0	0.0666667	0	0	0.111111	0.166667	0.666667	0	0.285714	0.3
0,-1,-3,-2	0.047619	0.0606061	0	0	0.166667	0.25	0.0967742	0	0	0	0.0333333	0	0.0666667	0.142857	0	0	0	0	0	0	0
0,1,3,3	0	0.0322581	0	0.0625	0	0	0	0	0.0322581	0	0.0666667	0	0	0	0	0.111111	0	0	0	0.1	0
0,1,3,-3	0	0	0	0.0625	0	0	0	0	0	0	0	0	0	0	0	0	0	0	0	0	0
0,-1,3,3	1	0	0	0	0	0	0	0	0	0	0	0	0	0	0	0	0	0	0	0	0.333333
0,-1,-3,3	0	0	0	0	0	0.0416667	0	0	0	0	0	0	0	0.0714286	0	0	0	0	0	0	0
0,-1,-3,-3	0.047619	0.030303	0.166667	0	0	0	0	0	0	0	0.0333333	0	0.0666667	0	0	0	0	0	0	0	0
0,1,3,4	0.645161	0.612903	0.384615	0.6875	0.5	0.692308	0.375	0	0.0967742	0.0666667	0.266667	0	0	0.222222	0	0	0	0.5	0	0.1	0
0,1,-3,-4	0	0	0	0	0	0.166667	0	0	0	0	0	0	0	0	0	0	0	0	0	0	0
0,-1,3,4	0	0	0	0	0	0	0	0	0	0.333333	0	0	0	0	0	0	0	0	0	0	0
0,-1,-3,4	0.047619	0	0.166667	0	0	0	0	0	0	0.0909091	0.0333333	0	0	0	0	0	0.166667	0	0	0	0
0,-1,-3,-4	0.619048	0.242424	0.166667	0.333333	0.25	0.416667	0.354839	0	0.133333	0.363636	0.333333	0	0.333333	0.285714	0	0	0	0.333333	0	0	0
0,1,3,5	0.258065	0.193548	0.384615	0.0625	0	0.0769231	0.4375	0	0.548387	0.733333	0.333333	0	0.75	0.333333	1	0.222222	1	0	0	0.6	0.25
0,1,-3,5	0	0	0	0	0	0	0	0	0	0	0	0	0	0	0	0	0	0	0	0	0.25
0,1,-3,-5	0	0	0	0	0	0	0	0	0	0	0	0	0	0	0.5	0	0	0	0	0	0
0,-1,-3,5	0	0	0	0	0	0.0416667	0	0	0	0	0	0	0	0	0	0	0	0	0	0	0
0,-1,-3,-5	0.047619	0.212121	0.166667	0.111111	0.333333	0	0.225806	0	0.466667	0.545455	0.0666667	0	0.266667	0.142857	0	0.555556	0	0	0	0.285714	0.1
0,1,3,6	0	0	0	0	0	0	0	0	0	0	0.0666667	0	0	0.111111	0	0.111111	0	0	0	0	0
0,1,-3,-6	0.5	1	1	0	0.2	0.333333	0	0	0	0	0	0	0.5	0.25	0.5	0	1	0	0	0	0
0,-1,3,6	0	0	0	1	0	0.333333	0	0	0.166667	0	0	0	0	0	0	0	0	0	0	0	0
0,-1,-3,6	0	0	0	0	0	0	0	0	0	0	0	0	0	0	0	0	0	0	0	0	0.1
0,-1,-3,-6	0.0952381	0.121212	0	0	0	0.125	0.129032	1	0	0	0.0333333	0.5	0	0	0	0.111111	0.166667	0	0	0.285714	0.1
0,1,-3,-7	0	0	0	0.2	0	0	0	0	0	0	0	0	0.166667	0	0	0	0	0	0	0	0
0,-1,3,7	0	0	0	0	0	0	0	0	0	0	0	0	0	0	0	0	0	0	0	1	0
0,-1,-3,7	0	0.0606061	0	0	0	0.0416667	0	0	0	0	0	0	0	0	0	0	0	0	0	0	0
0,-1,-3,-7	0	0	0.166667	0	0	0	0.0322581	0	0	0	0.0333333	0	0	0.142857	0	0	0	0	0	0.142857	0.1
0,1,3,8	0	0	0	0	0	0	0	0	0	0	0	0	0	0.111111	0	0	0	0	0	0	0
0,1,3,-8	0.0322581	0	0	0	0	0	0	0	0	0	0	0	0	0	0	0	0	0	0	0	0
0,1,-3,-8	0	0	0	0	0	0.166667	0	0	0	0	0	0	0	0	0	0	0	0	0	0	0.25
0,-1,3,8	0	0	0	0	0	0	0	0	0	0	0	0	0	0.25	0	0	0	0	0	0	0
0,-1,-3,8	0	0	0	0	0.0833333	0	0	0	0	0	0	0	0	0.0714286	0	0	0	0	0	0	0
0,-1,-3,-8	0.047619	0	0.166667	0	0	0	0.0322581	0	0	0	0.0333333	0	0	0	0	0	0	0	0	0	0
0,1,-3,9	0	0	0	0.2	0	0	0	0	0	0	0	0	0	0	0	0	0	0	0	0	0
0,-1,-3,9	0	0	0	0	0	0	0	0	0	0	0	0	0	0.0714286	0	0	0	0	0	0	0
0,1,4,0	0	0	0	0	0	0	0	0	0	0.5	0	0	0	0	0	0	0	0	0	0	0
0,-1,-4,0	0	0	0	0	0	0	0	0	0	0	0	0	0	0.222222	0	0	0	0	0	0	0
0,1,4,1	0.222222	0.125	0	0.142857	0.4	0.0714286	0.125	0	0	0	0	1	0	0	0	0	0	1	0	0	0
0,1,4,-1	0	0	0	0	0	0.0714286	0	0	0	0	0	0	0	0	0	0	0	0	0	0	0
0,1,-4,-1	0	0	0	0	0	1	0	0	0	1	0	0	0	0	0	0	0	0	0	0	0
0,-1,4,1	0.333333	0	0	0	0	0.25	0	0	0.111111	0	0	0	0	0	0	0	0	0	0	0	0
0,-1,4,-1	0	0	0	0	0	0.25	0	0	0	0	0	0	0	0	0	0	0	0	0	0	0
0,-1,-4,-1	0	0	0	0	0	0.125	0	0	0	0	0.2	0	0.25	0	0	0	0	0	0.5	0.333333	0
0,-1,-4,10	0	0	0	0.333333	0	0	0	0	0	0	0	0	0	0	0	0	0	0	0	0	0
0,1,4,11	0	0	0	0	0	0.0714286	0.125	0	0	0	0	0	0	0	0	0	0	0	0	0	0
0,-1,-4,11	0	0	0	0.333333	0	0	0	0	0	0	0	0	0	0	0	0	0	0	0	0	0
0,1,4,12	0	0.125	0	0	0	0	0	0	0	0	0	0	0	0	0	0	0	0	0	0	0
0,1,4,2	0.111111	0.25	0	0.285714	0.2	0	0.25	0	0	0	0	0	0	0	0	0	0	0	0	0	0
0,1,-4,-2	0	0	0	0	0	0	0	0	0	0	1	0	0	0	0	0	0	0	0	1	0
0,-1,4,2	0	0	0	0	1	0	0	0	0.666667	0	1	0	0	0	0	0	0	0	0	0	0
0,-1,-4,-2	0.285714	0	0	0	0	0.125	0.0909091	0	0	0	0	0	0	0.111111	0	0	0	0	0	0	0
0,1,4,3	0.333333	0	0	0.428571	0	0.214286	0	0	0	0	0	0	0	0	0.5	0	0	0	0	0	0
0,-1,4,3	0.333333	0	0	0	0	0.25	0	0	0.222222	0	0	0	0	0	0	0	0	0	0	0	0
0,-1,-4,-3	0.428571	0.25	0	0	0	0.125	0.0909091	0	0	0	0	0	0	0	0	0	0	0	0	0.333333	0
0,1,4,4	0	0	0	0	0	0	0	0	0	0	0.7	0	0	0	0.5	0	0.5	0	0	0	0
0,1,-4,-4	0	0	0	1	0	0	0	0	0	0	0	0	0	0	0	0	0	0	0	0	0
0,-1,4,4	0.333333	0	0	0	0	0	0	0	0	0	0	0	0	0	0	1	1	0	0	0	0
0,-1,4,-4	0	0	0	0	0	0	0	0	0	0	0	0	0	0	0	0	0	0	0	0	0.5
0,-1,-4,4	0	0	0	0	0	0	0	0	0	0	0	0	0	0.333333	0	0	0	0	0	0	0
0,-1,-4,-4	0	0	0	0	0	0	0	0	0	0	0	0	0	0.111111	0	0	0	0	0	0	1
0,1,4,5	0	0.125	0	0	0	0.0714286	0	0	0	0	0.1	0	0	0	0	0	0	0	0	0	0
0,-1,4,5	0	0	1	0	0	0	0	0	0	0	0	0	0	0	0	0	0	0	0	0	0
0,-1,-4,-5	0.142857	0	0	0	0.5	0.375	0.272727	0	0	0	0.4	0	0.25	0.222222	0	0.75	0	0	0	0	0
0,1,4,6	0	0	0	0	0	0	0	0	0	0	0	0	0	0.333333	0	0	0	0	0.5	1	0
0,-1,4,6	0	0	0	0	0	0	0	0	0	0	0	0	0	0	0	0	0	0	0	0	0.5
0,-1,-4,-6	0	0	0	0	0	0	0	0	0	0	0	0	0	0	0	0.25	0.5	0	0	0	0
0,1,4,7	0	0.375	0	0	0.2	0.285714	0.125	0	0	0	0.1	0	0.5	0.666667	0	1	0.25	0	0	0	0
0,1,-4,-7	1	0.333333	0	0	0	0	0	0	0	0	0	0	0	0	0	0	0	0	0	0	0
0,-1,4,7	0	1	0	0	0	0.25	0	0	0	0	0	0	0	0	0	0	0	0	0	0	0
0,-1,-4,-7	0	0	0	0	0	0	0.0909091	0	1	0	0	0	0	0	0	0	0.5	0	0	0	0
0,1,4,8	0.222222	0	1	0.142857	0	0.214286	0.375	0	0	0.5	0.1	0	0.5	0	0	0	0.25	0	0.5	0	0
0,1,-4,-8	0	0.333333	0	0	0	0	1	0	0	0	0	0	0	0	0	0	0	0	0	0	0
0,-1,4,8	0	0	0	0	0	0	1	0	0	0	0	0	0	0	0	0	0	0	0	0	0
0,-1,-4,-8	0.142857	0.75	0	0.333333	0.5	0.25	0.454545	0	0	0	0.4	0	0.5	0	0	0	0	0	0.5	0.333333	0
0,1,4,9	0.111111	0	0	0	0.2	0	0	0	1	0	0	0	0	0	0	0	0	0	0	0	0
0,1,-4,-9	0	0.333333	0	0	0	0	0	0	0	0	0	0	0	0	0	0	0	0	0	0	0
0,-1,4,9	0	0	0	0	0	0	0	0	0	0	0	0	0	0	0	0	0	0	1	0	0
0,1,5,0	0.142857	0	0	0	0	0	0	0	0	0	0	0	0	0	0	0	0	0	0	0	0
0,-1,5,0	0.5	0	0	0	0	0	0	0	0	0	0	0	0	0	0	0	0	0	0	0	0
0,-1,-5,0	0	0	0	0	0	0	0	0	0	0	0	0	0.25	0.125	0	0	0	0	0	0	0
0,1,5,1	0	0	0	0	0	0.142857	0	0	0.5	0	0	0	0	0.666667	0	0	0	0	0	0	0
0,1,-5,1	0	1	0	0	0	0	0	0	0	0	0	0	0	0	0	0	0	0	0	0	0
0,-1,-5,-1	0	0	0.25	0	0	0	0.333333	0	0	0	0	0	0.125	0	0	0	0	0	0.25	0	0
0,-1,-5,-10	0	0.142857	0	0	0	0	0	0	0	0	0	0	0.125	0	0.333333	0	0	0	0.25	0	0
0,1,5,12	0	0.25	0	0	0	0.142857	0	0	0	0	0	1	0	0	0	0	0	0	0	0	0
0,1,5,2	0	0	0	0	0	0	0.1	0	0	0	0	0	0	0	0	0	0	0	0	0	0
0,-1,-5,2	0	0	0	0	0	0	0	0	0	0	0	0	0.125	0	0	0	0	0	0	0	0
0,-1,-5,-2	0	0.142857	0	0	0.5	0	0	0	0	0	0	0	0	0	0	0	0	0	0	0	0
0,1,-5,-3	0	0	0	0	0	0	0	0	0	0	0	0	0	1	0	0	0	0	0	0	0
0,-1,5,3	0	0	0	0	0	0	0	0	0.5	0	0	0	0	0.5	0	0	0	0	0	0	0
0,-1,-5,-3	1	0	0	0	0	0	0	0	0.5	0	0	0.5	0	0	0	0	0	0	0	0.5	0.25
0,1,5,4	0.142857	0	0	0	0	0	0	0	0	0	0	0	0	0.333333	0	0	0	0	0	0	0
0,-1,5,4	0	0	0	0	0	1	0	0	0	0	0	0	0	0.5	0	0	1	0	0	0	0
0,-1,-5,-4	0	0	0	0	0	0	0.333333	0	0	0	0	0	0	0	0	0	0	0	0	0	0
0,1,5,5	0	0	0	0	0	0	0	0	0	0	0	0	0	0	0	0.6	0	0	0	0	0
0,1,-5,-5	1	0	0	0	0	0	0	0	0	0	0.5	0	0	0	0	0	0	0	0	0	0
0,-1,5,5	0.5	0	0	0	0	0	0	0	0	0	0	0	0	0	0	0	0	0	0	0	0
0,-1,-5,-5	0	0	0	0	0	0	0	0	0.5	0	0	0	0	0.125	0	0	0	0	0	0	0.25
0,1,5,6	0	0	0.142857	0	0	0	0	0	0	0	0	0	0	0	0	0	0	0	0	0	0
0,-1,5,6	0	0	0	0	0	0	0	0	0.5	0	0	0	0	0	0	0	0	0	0	0	0
0,-1,-5,-6	0	0	0.25	0	0	0	0	0	0	1	0	0	0	0.625	0.333333	0	0	0	0	0	0
0,1,5,7	0	0	0	0	0	0	0	0	0	0	0	0	0	0	0	0.4	0	0	0	0	0
0,-1,5,7	0	0	0	0	0	0	1	0	0	0	0	0	0	0	0	0	0	0	0	0.5	0
0,-1,-5,-7	0	0	0	0	0	0	0	1	0	0	0	0	0	0	0	0	0	0	0.25	0	0
0,1,5,8	0.571429	0.75	0.857143	1	1	0.428571	0.8	0	0.5	0	0	0	0.8	0	0	0	0	0	0	1	0
0,1,-5,-8	0	0	0	0	0	0	0	0	0	0	0.5	0	0	0	0	0	0	0	0	0	0
0,-1,-5,-8	0	0.571429	0.5	0	0.5	0	0	0	0	0	0	0.5	0.375	0.125	0.333333	0	0	0.8	0.25	0.5	0.5
0,1,5,9	0.142857	0	0	0	0	0.285714	0.1	0	0	0	0	0	0.2	0	0	0	0	1	0	0	0
0,-1,5,9	0	0	0	0	0	0	0	0	0	0	0	0	0	0	0	0	0	0	0	0.5	0
0,-1,-5,-9	0	0.142857	0	0	0	1	0.333333	0	0	0	0	0	0	0	0	0	0	0.2	0	0	0
0,1,6,0	1	0	0	0	0	0	0	0	0	0	0	0	0	0	0	0	0	0	0	0	0
0,1,6,1	0	0	0	0	0	0.5	0	0	0	0	0	0	0	0	0	0	0	0	0	0	0
0,1,6,-1	0	0.5	0	0	0	0	0	0	0	0	0	0	0	0	0	0	0	0	0	0	0
0,1,-6,-1	0	0	0	0	0	0	0	0	0	0	0	0	0	0	0	0	0	0	0	1	0
0,-1,-6,-1	0	0	0	0	0	0	0	0	0.666667	0	0	0	0	0	0	0	0	0	0	0	0
0,-1,-6,-10	0	0.333333	0	0	0	0.5	0	0	0	0	0	0	0	0	0	0	0	0	0	0	0
0,1,6,11	0	0	0	0	0	0	0	0	0	0	0	0	0	0.333333	0	0	0	0	0	0	0
0,-1,-6,-11	0	0	0	0	0	0	0	0	0.333333	0	0	0	0	0	0	0	0	0	0	0	0
0,-1,-6,-12	0.75	0	0	0	0	0	0	0	0	0	0	0	0	0	0	0	0	0	0	0	0
0,1,6,-2	0	0	0	0	0.5	0	0	0	0	0	0	0	0	0	0	0	0	0	0	0	0
0,1,-6,-2	0	0	0	0	1	0	0	0	0	0	0	0	0	0	0	0	0	0	0	0	0
0,1,6,3	0	0	0	0	0	0	0	0	0	0	0	0	0	0	0	0	0.5	0	0	0	0
0,-1,6,3	1	0	0	0	0	0	0	0	0	0	0	0	0	0	0	0	0	0	0	0	0
0,-1,-6,-3	0.25	0	0	0	0	0	0	0	0	0	1	0	0	0	0	0	0	0	0	0	0
0,1,6,4	0	0.5	0	0.5	0	0	0	0	0	0	0	0	0	0	0	0	0	0	0	0	0
0,1,-6,-4	1	0	0	0	0	0	0	0	0	0	0	0	0	0.5	0	0	0	0	0	0	0
0,-1,-6,-4	0	0	0	0	0	0	0.5	0	0	0	0	0	0	0	0	0	0	0	0	0	0
0,1,6,5	0	0	0	0.5	0	0	0	0	1	0	0	0	0	0	0	0	0	0	0	0	0
0,1,-6,-5	0	0.5	0	0	0	0	0	0	0	0	0	0	0	0.5	0	0	0	0	0	0	0
0,-1,6,5	0	0	0	0	0	0	0	0	1	0	0	0	0	0	0	0	0	0	0	0	0
0,-1,-6,-5	0	0.333333	0	0	0	0.5	0	0	0	0	0	0	0	0.2	0	0	0	0	0	0	0
0,1,-6,-6	0	0	0	0	0	0	0	0	1	0	0	0	0	0	0	0	0	0	0	0	0
0,-1,6,6	0	0	0	0	0	0	0	0	0	0	0	0	0	0	0	0.5	0.5	0	0	0	0
0,-1,-6,-6	0	0	0	0	0	0	0	0	0	0	0	0	0	0.2	0	0	0	0	0	0	0
0,1,6,7	0	0	0	0	0	0	0	0	0	0	0	0	0	0.666667	0	0	0	0	0	0	0
0,1,6,-7	0	0	0	0	0	0	0	0	0	0	0	0	0	0	0	0	0	0	0	1	0
0,1,-6,-7	0	0.5	0	0	0	0	0	0	0	0	0	0	0	0	0	0	0	0	0	0	0
0,-1,-6,-7	0	0	0	0	0	0	0	0	0	0	0	0	0	0.6	0	0	0	0	0	0	0
0,1,6,8	0	0	0	0	0	0	1	0	0	0	0	0	0	0	0	0	0.5	0	0	0	0
0,-1,6,8	0	0	0	0	0	0	0	0	0	0	0	0	0	0	0	0.5	0	0	0	0	0
0,-1,-6,-8	0	0.333333	0	0	1	0	0.5	0	0	0	0	0	0	0	1	0	0	0	0	0	0
0,1,6,9	0	0	0	0	0.5	0.5	0	0	0	0	0	0	0	0	0	0	0	0	0	0	0
0,-1,6,9	0	0	0	0	0	0	0	0	0	0	0	0	0	0	0	0	0.5	0	0	0	0
0,1,7,0	0	0	0	0	0	0	0	0	0	0	0	0	0	0	0	0	1	0	0	0	0
0,-1,7,-1	0.333333	0	0	0	0	0	0	0	0	0	0	0	0	0	0	0	0	0	0	0	0
0,1,7,10	0	0	0	0	0	0	0	0	0	0	0	0	0	0	0	0	0	0	0	1	0
0,-1,7,10	0	0	0	0.5	0	0	0	0	0	0	1	0	0	0	0	0	0	0	0	0	0
0,1,7,12	1	0	0	0	0	0	0	0	0	0	0	0	0	0	0	0	0	0	0	0	0
0,-1,-7,-2	0	0	0	0	0	0	0	0	0	0	0	0	0	0	0	0	0	0	1	0	0
0,1,-7,-3	1	0	0	0	0.5	0	0	0	0	0	0	0	0	0	0	0	0	0	0	0	0
0,-1,7,3	0.333333	0	0	0	0	0	0	0	0	0	0	0	0	1	0	0	0	0	0	0	0
0,1,-7,-4	0	0	0	0	0.5	1	0	0	0	1	0	0	0	0	0	0	0	0	0	0	0
0,1,-7,-5	0	0	0	0	0	0	0	0	0.5	0	0	0	0	1	0	0	0	0	0	0	0
0,1,7,6	0	0	0	0	0	0	0	0	0	0	1	0	0	0	0	0	0	0	0	0	0
0,-1,7,6	0	0	0	0	0	0	0.5	0	0	0	0	0	0	0	0	0	0	0	0	0	0
0,1,7,7	0	0	0	0	0	0	0	1	0	0	0	0	0	0	0	0	0	0	0	0	0
0,1,-7,-7	0	0	0	0	0	0	0	0	0.5	0	0	0	0	0	0	0	0	0	0	0	0
0,-1,7,7	0	0	0	0.5	0	0	0	0	0	0	0	0	0	0	0	0	0	0	0	0	0
0,1,7,8	0	0	0	0	0	0	0	0	0	0	0	0	0	0.75	0	0	0	0	0	0	0
0,-1,7,8	0.333333	0	0	0	0	0	0.5	0	0	0	0	0	0	0	0	0	0	0	0	0	0
0,-1,-7,-8	0	0	0	0	0	0	0	0	0	0	0	0	0	1	0	0	0	0	0	0	0
0,1,7,9	0	0	0	0	0	0	0	0	0	0	0	0	0	0.25	0	0	0	0	0	0	0
0,1,-7,-9	0	0	1	0	0	0	0	0	0	0	0	0	0	0	0	0	0	0	0	0	0
0,1,8,0	0.5	0	0	0	0	0	0	0	0	0	0	0	0	0	0	0	0	0	0	0	0
0,1,8,1	0	0	0	0	0	1	0	0	0	0	0	0	0	0	0	0	0	0	0	0	0
0,-1,-8,-1	0	0	0	0	0	0	0	0	0	0	0	0	0	1	0	0	0	0	0	0.5	0
0,-1,8,10	0	0	0	0	0	0	0	0	0	0	0	0	0	0	0	0	1	0	0	0	0
0,1,8,12	0.5	0	0	0	0	0	0	0	0	0	0	0	0	0	0	0	0	0	0	0	0
0,-1,-8,-13	0	0	0	0	0	0	0	0	1	0	0	0	0	0	0	0	0	0	0	0	0
0,-1,-8,-14	0	0	0	0	0	0	0	0	0	0	0	0	0	0	0	0	0	0	0	0.5	0
0,1,-8,-3	0	0	0	0.5	0	0	0	0	0	0	0	0	0	0	0	0	0	0	0	0	0
0,1,8,4	0	0	0	1	0	0	0	0	0	0	0	0	0	0	0	0	0	0	0	0	0
0,1,-8,-4	0	0	0	0	0	1	0	0	0	0	0	0	0	0	0	0	0	0	0	0	0
0,-1,8,4	0	0	0	0	0	0	0	0	0	0	0	0	1	1	0	0	0	0	0	0	0
0,1,-8,-5	0	0	0	0.5	0	0	0	0	0	0	0	0	0	0	0	0	0	0	0	0	0
0,-1,8,5	0	0	0	0	0	0	0	0	0	0	0	0	0	0	0	0	0	0	0	1	0
0,1,8,6	0	0	0	0	0	0	0	0	0	0	0	0	1	0	0	0	0	0	0	0	0
0,-1,-8,-6	0	1	0	0	0	0	0	0	0	0	0	0	0	0	0	0	0	0	0	0	0
0,1,8,8	0	0	0	0	0	0	0	0	0	0	0	0	0	0	0	1	0	0	0	0	0
0,1,8,9	0	0	1	0	0	0	1	0	0	0	0	0	0	0	0	0	0	0	0	0	0
0,-1,8,9	0	0	0	1	0	0	0	0	0	0	0	0	0	0	0	0	0	0	0	0	0
0,1,9,0	0.333333	0	0	0	0	0	0	0	0	0	0	0	0	0	0	0	0	0	0	0	0
0,1,9,1	0	0	0	0	0	0	0	0	0	0	1	0	0	0	0	0	0	0	0	0	0
0,-1,9,-1	0	0	0	0	0	0.25	0	0	0	0	0	0	0	0	0	0	0	0	0	0	0
0,-1,-9,-11	0	1	0	0	0	0	0	0	0	0	0	0	0	0	0	0	0	0	0	0	0
0,-1,-9,-2	0	0	0	0	0	0	1	0	0	0	0	0	0	0	0	0	0	0	0	0	0
0,1,9,4	0	0	0	0	1	0	0	0	0	0	0	0	0	1	0	0	0	0	0	0	0
0,-1,9,5	0	0	0	0	0	0.25	0	0	0	0	0	0	0	0	0	0	0	0	0	0	0
0,-1,-9,-5	0	0	0	0	0	0	0	0	0	0	0	1	0	0	0	0	0	0	0	0	0
0,1,9,6	0.666667	0	0	0	0	0	0	0	0	0	0	0	0	0	0	0	0	0	0	0	0
0,-1,9,6	0	0	0	0	0	0.25	0	0	0	0	0	0	0	0	1	0	0	0	0	0	0
0,-1,-9,-6	0	0	0	1	0	1	0	0	0	0	0	0	0	0	0	0	0	0	0	0	0
0,-1,9,8	0	0	0	0	0	0.25	0	0	0	0	0	0	0	0	0	0	0	0	0	0	0
0,-1,-9,-8	0	0	1	0	0	0	0	0	0	0	0	0	0	0	0	0	0	0	0	0	0
0,-10,0,0	0	0	0	0	0	0	0	0	0	0	0	0	0	0	0	1	0	0	0	0	0.5
0,-10,0,-1	0	0	0	1	0	0	0	0	0	0	0	0	0	0	0	0	0	0	0	0	0
0,10,0,10	0	0	0	0	0	0	0	0	0	0	0	0	0	0	0	0	0	0	0	0	1
0,-10,0,-10	0	0	0	0	0	0	0	0	0	0	0	0	0	0	0	0	0	0	0	0	0.5
0,10,0,12	0	0	0	0	0	0	0	0	0	0	0	0	0	1	0	0	0	0	0	0	0
0,10,0,3	0	0	0	0	0	0	0	0	0	0	0	0	0	0	0	0	0	0	1	0	0
0,10,0,8	0	0	0	0	0	1	0	0	0	0	0	0	0	0	0	0	0	0	0	0	0
0,10,1,10	0	0	0	0	1	0	0	0	0	0	0	0	0	0	0	0	0	0	0	0	0
0,10,10,10	0	0	0	0	0	0	0	0	0	0	0	0	0	0	0	0	1	0	0	0	0
0,10,10,15	0	0	0	0	0	0	0	0	0	0	0	0	0	0	0	0	0	0	0	0	0.5
0,10,10,3	0	0	0	0	0	0	0	0	0	0	0	0	0	0	0	0	0	0	0	0	0.5
0,10,10,4	0	0	0	0	1	0	0	0	0	0	0	0	0	0	0	0	0	0	0	0	0
0,10,10,7	0	0	0	0	0	0	0	0	0	0	0	0	0	1	0	1	0	0	0	1	0
0,10,10,8	0	0	0	0	0	0	0	1	0	0	1	0	0	0	0	0	0	0	0	0	0
0,10,11,13	0	0	1	0	0	0	0	0	0	0	0	0	0	0	0	0	0	0	0	0	0
0,10,12,10	0	0	0	0	0	0	0	1	0	0	0	0	0	0	0	1	0	0	0	0	0
0,10,12,-12	0	0	0	0	0	0	0	0	0	0	0	0	0	0	0	0	0	1	0	0	0
0,10,12,15	0	0	0	0	0	0	0	0	0	0	0	0	0	0	0	0	0	0	0	1	0
0,10,12,17	0	0	0	0	0	0	0	0	0	0	0	0	0	0	1	0	0	0	0	0	0
0,-10,-12,-22	0	0	0	0	0	0	0	0	0	0	0	0	0	1	0	0	0	0	0	0	0
0,10,12,8	0	0	0	0	1	0	0	0	0	0	0	0	0	0	0	0	0	0	0	0	0
0,10,13,-3	0	0	0	0	0	1	0	0	0	0	0	0	0	0	0	0	0	0	0	0	0
0,10,15,17	0	0	0	0	0	0	0	0	0	0	0	0	0	0	0	1	0	0	0	0	0
0,10,19,17	0	0	0	0	0	0	0	0	1	0	0	0	0	0	0	0	0	0	0	0	0
0,-10,-2,0	0	0	0	0	0	1	0	0	0	0	0	0	0	0	0	0	0	0	0	0	0
0,-10,2,-10	0	0	0	0	0	0	0	0	0	0	0	0	0	1	0	0	0	0	0	0	0
0,10,2,5	0	0	0	0	0	0	0	0	0	0	0	0	0	0	0	0	0	0	1	0	0
0,-10,-2,-8	0	0	0	0	0	0	0	0	1	0	0	0	0	0	0	0	0	0	0	0	0
0,10,-3,7	0	0	0	0	0	1	0	0	0	0	0	0	0	0	0	0	0	0	0	0	0
0,-10,-4,-1	0	0	0	0	0	0	0	0	0	1	0	0	0	0	0	0	0	0	0	0	0
0,10,4,22	0	0	0	0	0	0	0	0	0	1	0	0	0	0	0	0	0	0	0	0	0
0,-10,4,9	0	0	0	0	0	0	0	0	1	0	0	0	0	0	0	0	0	0	0	0	0
0,-10,-5,0	0	1	0	0	0	0	0	0	0	0	1	0	0	1	0	0	0	0	0	0	0
0,-10,-5,2	0	0	0	0	0	0	0	0	0	0	0	0	0	0	0	0	0	0	1	0	0
0,10,5,3	0	0	0	0	0	1	0	0	0	0	0	0	0	1	0	0	0	0	0	0	0
0,10,5,8	0	0	0	0	0	0	0	0	0	0	0	0	0	0	0	0	0	0	1	0	0
0,10,6,10	0	0	0	0	0	0	0	0	0	0	0	0	1	0	0	0	0	0	0	0	0
0,10,6,2	0	0	0	0	0	1	0	0	0	1	0	0	0	0	0	0	0	0	0	0	0
0,10,6,3	0	0	0	0	0	0	0	0	0	0	0	0	0	0	0	0	0	0	0	0	1
0,-10,-7,0	1	0	0	0	0	0	0	0	0	0	0	0	0	0	0	0	0	0	1	0	0
0,10,7,10	0	0	0	0	0	0	0	0	0	0	0	0	0	0	0.5	0	0	0	0	0	0.25
0,-10,-7,-10	0	0	1	0	0	0	0	0	0	0	0	0	0	0	0	0	0	0.5	0	0	0
0,10,7,2	0	0	0	0	0	0	0	0	0	0	0.5	0	0	0	0	0	0	0	0	0	0
0,10,7,3	0	0	0	0	1	0.5	0	0	0	0	0	0	1	0	0	0	0	0	0	0	0
0,10,7,4	0	0	0	0	0	0	0	0	0	0	0	0	0	0	0	0	0	0	0	1	0
0,10,7,5	0	1	0	0	0	0	0	0	0	0	0.5	0	0	0	0	0	0	0	0	0	0.5
0,-10,-7,-5	0	0	0	0	0	1	0	0	0	0	0	1	0	0	0	0	0	0	0	1	0
0,-10,-7,-7	0	0	0	0	0	0	0	0	0	0	0	0	0	0	0	0	0	0.5	0	0	0
0,10,7,8	1	0	0	0	0	0.5	0	0	0	0	0	0	0	0	0.5	0	0	0	0	0	0.25
0,10,8,0	0	0	0	0	0	0	0	0	0	0	0	0	0	0	1	0	0	0	0	0	0
0,10,8,4	0	0	0	0	0	0.5	0	0	0	0	0	0	0	0	0	0	0	0	0	0	0
0,10,8,5	0	0	0	0	0	0.5	0	0	0	0	0	0	0	0	0	0	0	0	0	0	0
0,10,8,7	0	1	0	0	0	0	1	0	0	0	0	0	0	0	0	0	0	0	0	0	0
0,10,9,4	0	0	0	0	0	0.5	0	0	0	0	0	0	0	0	0	0	0	0	0	0	0
0,-10,-9,-6	0	0	0	0	0	0	0	0	0	0	0	0	0	1	0	0	0	0	0	0	0
0,10,9,7	0	0	0	1	0	0	0	0	0	0	0	0	0	0	0	0	0	0	0	0	0
0,10,9,8	0	0	0	0	0	0.5	0	0	0	0	0	0	0	0	0	0	0	0	0	0	0
0,-10,-9,-8	0	0	0	0	1	0	0	0	0	0	0	0	0	0	0	0	0	0	0	0	0
0,-11,0,0	0	0	0	0	0	0	0	0	0	0	0	0	0	0.4	0	0	0	0	0	0	0
0,-11,0,1	0	0	0	0	0	0	0	0	0	0	0	0	0	0.2	0	0	0	0	0	0	0
0,11,0,11	0	0	0	0	0	0	0	0	0	0	0	0	0	1	0	0	0	0	0	0	0
0,-11,0,-11	0	0	0	0	0	0	0	0	0	0	0	0	0	0.4	0	0	0	0	0	0	0
0,-11,-1,-10	0	0	0	0	1	0	0	0	0	0	0	0	0	0	0	0	0	0	0	0	0
0,11,10,11	0	0	0	0	0	0	0	0	0	0	0	0	0	0	0	0	0	0	0	0	1
0,-11,-10,-9	0	0	0	0	1	0	0	0	0	0	0	0	0	0	0	0	0	0	0	0	0
0,11,11,0	0	0	0	0	0	0	0	0	0	0	0	0	0	0.5	0	0	0	0	0	0	0
0,11,11,11	0	0	0	0	0	0	0	0	0	0	0	0	0	0.5	0	0	0	0	0	0	0
0,11,12,10	0	0	0	0	1	0	0	0	0	0	0	0	0	0	0	0	0	0	0	0	0
0,11,12,12	0	0	0	0	0	0	0	0	0	0	0	0	0	0.5	0	0	0	0	0	0	0
0,11,12,13	1	0	0	0	0	0	0	0	0	0	0	0	0	0	0	0	0	0	0	0	0
0,11,12,14	0	0	0	0	0	0	0	0	0	0	0	0	0	0.5	0	0	0	0	0	0	0
0,-11,-12,-15	1	0	0	0	0	0	0	0	0	0	0	0	0	0	0	0	0	0	0	0	0
0,-11,-12,-3	0	0	0	0	0	0	0	0	0	0	0	0	0	0	0	0	0	0	0	1	0
0,11,12,9	0	0	0	0	0	0	1	0	0	0	0	0	0	0	0	0	0	0	0	0	0
0,11,13,11	0	0	0	0	0	0	0	0	0	0	0	0	0	0	0	0	1	0	0	0	0
0,-11,-13,-15	0	0	0	0	0	0	0	0	0	0	0	0	0	0	0	0	1	0	0	0	0
0,11,14,12	0	0	0	0	0	0	0	0	0	0	0	0	1	0	0	0	0	0	0	0	0
0,-11,-14,-9	0	0	0	0	0	0	0	0	0	0	0	0	0	1	0	0	0	0	0	0	0
0,11,15,19	0	0	0	0	0	0	0	0	0	0	0	0	0	1	0	0	0	0	0	0	0
0,-11,-2,-11	0	0	0	0	0	0	0	0	0.0952381	0	0	0	0	0	0	0	0	0	0	0	0
0,-11,-2,-13	0	0	0	0	0	0	0	0	0.380952	0	0	0	0	0	0	0	0	0	0	0	0
0,-11,-2,-4	0	0	0	0	0	0	0	0	0.047619	0	0	0	0	0	0	0	0	0	0	0	0
0,-11,-2,-6	0	0	0	0	0	0	0	0	0.047619	0	0	0	0	0	0	0	0	0	0	0	0
0,-11,-2,-7	0	0	0	0	0	0	0	0	0.238095	0	0	0	0	0	0	0	0	0	0	0	0
0,-11,-2,-8	0	0	0	0	0	0	0	0	0.0952381	0	0	0	0	0	0	0	0	0	0	0	0
0,-11,-2,-9	0	0	0	0	0	0	0	0	0.0952381	0	0	0	0	0	0	0	0	0	0	0	0
0,11,5,2	0	0	0	0	0	0	0	0	0	0	0	0	0	0	0	1	0	0	0	0	0
0,-11,5,7	0	0	0	0	0	0	0	0	0	0	0	0	0	0	0	1	0	0	0	0	0
0,-11,-7,-3	0	0	0	0	0	0	0	0	0	0	0	0	1	0	0	0	0	0	0	0	0
0,11,7,4	0	1	0	0	0	1	0	0	0	0	0	0	0	0	0	0	0	0	0	0	0
0,-11,-7,-5	0	0	0	0	0	0	0	0	0	0	0	0	0	0	0	1	0	0	0	0	0
0,11,8,7	0	0	0	0	0	0	0	0	0	0	0	0	0	1	1	0	0	0	0	0	0
0,11,8,8	0	0	0	0	0	0	0	0	1	0	0	0	0	0	0	0	0	0	0	0	0
0,11,8,9	1	1	0	0	0	0	0	0	0	0	0	0	0	0	0	0	0	0	0	0	0
0,11,9,4	0	0.5	0	0	0	0	0	0	0	0	0	0	0	0	0	0	0	0	0	0	0
0,11,9,6	0	0	0	0	0	0.5	0	0	0	0	0	0	0	0	0	0	0	0	0	0	0
0,11,9,7	0	0.5	0	0	0	0	0	0	1	1	0	0	0	0	0	0	0	0	0	0	0
0,11,9,8	0	0	0	0	0	0.5	0	0	0	0	0	0	0	0	0	0	0	0	0	0	0
0,-12,0,0	0	0	0	0	0	0	0	0	0	0	0	0	0	0	0	0	0	0	0	0.2	0
0,12,0,12	0	0	0	0	0	0	0	0	0	0	0	0	0	0	0	0	0	0	0	1	1
0,-12,0,-12	0	0	0	0	0	0	0	0	0	0	0	0	0	0	0	0	0	0	0	0.2	0.333333
0,-12,0,2	0	0	0	0	0	0	0	0	0	0	0	0	0	0	0	0	0	0	0	0	0.333333
0,-12,0,-3	0	0	0	0	0	0	0	0	0	0	0	0	0	0	0	0	0	0	0	0	0.333333
0,12,0,-9	0	0	0	0	0	0	0	0	0	0	0	0	0	1	0	0	0	0	0	0	0
0,-12,0,-9	0	0	0	0	0	0	0	0	0	0	0	0	0	0	0	0	0	0	0	0.6	0
0,-12,1,0	1	0	0	0	0	0	0	0	0	0	0	0	0	0	0	0	0	0	0	0	0
0,12,1,11	0	0	0	0	1	0	0	0	0	0	0	0	0	0	0	0	0	0	0	0	0
0,12,1,12	0	0	0	0	0	0	0	0	0	0	0	0	0	1	0	0	0	0	0	0	0
0,-12,-1,-3	0	0	0	0	0	0	0	0	0	1	0	0	0	0	0	0	0	0	0	0	0
0,12,10,12	0	0	0	0	0	0	0	0	0	0	0	0	0	0	0	1	0	0	0	0	0
0,12,10,7	0	0	0	0	1	0	1	0	0	0	0	0	0	0	0	0	0	0	0	0	0
0,12,11,10	0	0	0	0	0	1	0	0	0	0	0	0	0	0	0	0	0	0	0	0	0
0,-12,-11,-10	0	0	0	0	1	0	0	0	0	0	0	0	0	0	0	0	0	0	0	0	0
0,12,11,11	0	0	0	0	0	0	0	0	0	0	0	0	0	0	0	0	0	1	0	0	0
0,12,11,-14	0	0	0	0	0	0	0	0	0	0	0	0	0	0	0	0	0	0	1	0	0
0,12,11,7	0	0	0	0	0	0	0	0	0	0	0	0	0	0	0	0	0	0	0	1	0
0,12,12,10	0	0	0	0	0	0	0	0	0	0	0.5	0	0	0	0	0	0	0	0	0.5	0
0,-12,-12,-10	0	0	0	0	0	0	0	0	0	0	0	0	0	0	0	0	1	0	0	0	0
0,12,12,11	0	0	0	0	0	0	0	0	0	0	0	0	0	0	0	0	0	0	0.5	0	1
0,12,12,12	0	0	0	0	0	0	0	0	0	0	0	0	0	1	0	0	0	0	0.5	0.5	0
0,12,12,13	0	0	0	0	0	0	0	0	0	0	0.5	0	0	0	0	0	0	0	0	0	0
0,12,12,15	0	0	0	0	0	0	0	0	0	0	0	0	0	0	0	1	0	0	0	0	0
0,-12,-12,-15	0	0	0	0	0	0	0	1	0	0	0	0	0	0	0	0	0	0	0	0	0
0,-12,-12,-9	0	0	0	0	0	0	0	0	1	0	0	0	0	0	0	0	0	0	0	0	0
0,12,14,10	0	0	0	0	0	0	0	0	0	0	0	0	0	0	0	0	0	0	0	0.5	0
0,12,14,15	0	0	0	0	0	0	0	0	0	0	0	0	0	0	0	0	0	0	0	0	1
0,-12,-14,-16	0	0	0	0	0	0	0	0	0	1	0	0	0	0	0	0	0	0	0	0	0
0,-12,-14,-19	0	0	0	0	0	0	0	0	0	0	0	0	0	1	0	0	0	0	0	0	0
0,12,14,2	0	0	0	0	0	0	0	0	0	0	0	0	0	0	0	0	0	0	0	0.5	0
0,12,14,3	0	0	0	0	0	0	0	0	0	0	0	0	0	0	0	1	0	0	0	0	0
0,-12,-15,-10	0	0	0	0	0	0	0	0	0	0	0	0	0	0	0	1	0	0	0	0	0
0,12,15,13	0	0	0	1	0	0	0	0	0	0	0	0	0	0	0	0	0	0	0	0	0
0,12,15,14	0	0	0	0	0	0	0	0	0	0	0	0	0	0	0	0	0	0	0	0	1
0,-12,-16,-21	0	0	0	0	0	0	0	0	0	0	1	0	0	0	0	0	0	0	0	0	0
0,12,17,16	1	0	0	0	0	0	0	0	0	0	0	0	0	0	0	0	0	0	0	0	0
0,-12,-17,-22	0	0	0	0	0	0	0	0	0	0	0	0	0	1	0	0	0	0	0	0	0
0,12,19,12	0	0	0	0	0	0	0	1	0	0	0	0	0	0	0	0	0	0	0	0	0
0,-12,-2,-5	0	0	0	0	0	0	0	0	0	0	0	0	0	0	0	0	0	0	0	1	0
0,-12,2,-8	0	0	0	0	0	0	0	0	0	0	0	0	0	1	0	0	0	0	1	0	0
0,-12,-21,-16	0	0	0	0	0	0	0	0	0	0	0	0	0	1	0	0	0	0	0	0	0
0,12,3,12	0	0	0	0	0	0	0	0	0	0	0	0	0	0	0	0	0	0	0	1	0
0,-12,-3,-15	0	0	0	0	0	0	0	0	0	0	0	0	0	0	0	0	0	0	0	1	0
0,12,-4,-3	0	0	0	0	0	0	0	0	0	0	0	1	0	0	0	0	0	0	0	0	0
0,12,4,9	0	1	0	0	0	0	0	0	0	0	0	0	0	0	0	0	0	0	0	0	0
0,-12,-5,-5	0	0	0	0	0	0	0	0	0	0	0	0	0	0	0	0	0	0	1	0	0
0,12,6,13	0	0	0	0	0	0	0	0	0	0	1	0	0	0	0	0	0	0	0	0	0
0,-12,6,5	0	0	0	0	0	0	0	0	0	0	0	0	0	0	0	0	0	0	0	1	0
0,-12,-7,-2	0	0	0	0	0	0	0	0	0.5	0	0	0	0	0	0	0	0	0	0	0	0
0,12,7,4	0	0	0	0	0	0	0	0	0	0	0	0	0	1	0	0	0	0	0	0	0
0,-12,-7,-5	0	0	0	0	0	0	0	0	0.5	0	0	0	0	0	0	0	0	0	0	0	0
0,-12,-7,-6	0	0	0	0	0	0	0	1	0	0	0	0	0	0	0	0	0	0	0	0	0
0,-12,-7,-7	0	0	0	0	0	0	0	0	0	0	0	0	0	0	0	1	0	0	0	0	0
0,-12,8,11	0	0	0	0	0	0	0	0	0	1	0	0	0	0	0	0	0	0	0	0	0
0,12,8,4	0	0	0	0	0	0	0	0	0	0	0.4	0	0	0	0	0	0	0	0	0	0
0,12,8,5	0	0	0	0	1	1	0	0	0	0	0.6	0	0	0	0	0	0	0	0	0	0
0,-12,-8,-5	0	0	1	0	0	0	1	0	0	0	0	0	0	0	0	0	0	0	0	0	0
0,-12,-8,-7	0	0	0	0	0	0	0	0	0	0	0	0	0	0	0	0	0	0	0	1	0
0,-12,-8,-8	0	0	0	0	0	0	0	0	0	0	0	0	0	0	0	0	1	0	0	0	0
0,12,9,10	0	0	0	0	0	0	0	0	1	0	0	0	0	0	0	0	0	0	0	0	0
0,12,9,12	0	0	0	0	0	0	0	0	0	0	0.125	0	0	0	0	0	0	0	0	0	1
0,12,9,4	0	0	0	0	0	0	0	0	0	0	0.25	0	0	0	0	0	0	0	0	0	0
0,12,9,5	0	0	0	0	0	0	0	0	0	0	0.375	0	0	0	0	0	1	0	0	0	0
0,12,9,7	0	0	0	0	0	0	0	0	0	0	0.25	0	0	0	0	0	0	0	0	0	0
0,-13,0,-6	0	0	0	0	0	0	0	0	0	0	0	0	0	0	0	0	0	0	0	1	0
0,13,10,6	0	0	0	0	1	0	0	0	0	0	0	0	0	0	0	0	0	0	0	0	0
0,13,11,10	0	1	0	0	0	0	0	0	0	0	0	0	0	0	0	0	0	0	0	0	0
0,13,11,8	0	0	0	0	0	1	0	0	0	0	0	0	0	0	0	0	0	0	0	0	0
0,13,12,10	1	0	0	0	0	0	0	0	0	0	0	0	0	0	0	0	0	0	0	0	0
0,-13,-13,-1	0	0	0	0	0	0	0	0	0	0	0	0	0	0	0	0	0	0	0	0	1
0,13,13,13	0	0	0	0	0	0	0	0	0	0	0	0	0	0	1	0	0	0	0	0	0
0,13,14,12	0	1	0	0	0	0	0	0	0	0	0	0	0	0	0	0	0	0	0	0	0
0,13,17,19	0	0	0	0	0	0	0	0	0	0	0	0	0	0	1	0	0	0	0	0	0
0,-13,-20,-18	0	0	0	0	0	0	0	0	0	0	0	0	0	0	0	1	0	0	0	0	0
0,-13,-3,-5	0	0	0	0	0	1	0	0	0	0	0	0	0	0	0	0	0	0	0	0	0
0,13,3,8	0	1	0	0	0	0	0	0	0	0	0	0	0	0	0	0	0	0	0	0	0
0,-13,-4,-11	0	0	0	0	0	0	0	0	1	0	0	0	0	0	0	0	0	0	0	0	0
0,13,7,13	0	0	0	0	0	0	0	0	0	0	0	0	0	0	0	0	0	0	0	1	0
0,13,8,1	0	0	0	0	0	0	0	0	0	0	0	0	0	1	0	0	0	0	0	0	0
0,-13,-8,-5	0	0	0	0	0	0	0	0	0	0	0	0	0	0	0	0	0	0	0	1	0
0,-13,-9,-6	0	0	0	1	0	0	0	0	0	0	0	0	0	0	0	0	0	0	0	0	0
0,-14,0,0	0	0	0	0	0	0	0	0	0	1	0	0	0	0	0	0	0	0	0	0	0
0,-14,-10,-12	0	0	0	0	0	0	0	0	0	0	0	0	0	0	0	1	0	0	0	0	0
0,14,10,6	0	0	0	0	1	0	0	0	0	0	0	0	0	0	0	0	0	0	0	0	0
0,14,10,7	0	0	0	0	0	1	0	0	0	0	0	0	0	0	0	0	0	0	0	0	0
0,14,10,8	0	0	0	0	0	0	0	0	0	1	0	0	0	0	0	0	0	0	0	0	0
0,14,12,10	0	0	0	0	0	0	0	0	0	0	0	0	0	0	0	0	1	0	0	0	0
0,14,12,7	0	0	0	0	0	0	0	0	0	0	0	0	0	0	0	0	0	1	0	0	0
0,-14,-12,-7	0	0	0	0	0	0	0	0	0	0	0	0	0	0	0	0	0	1	0	0	0
0,-14,-13,6	1	0	0	0	0	0	0	0	0	0	0	0	0	0	0	0	0	0	0	0	0
0,14,14,14	0	0	0	0	0	0	0	0	0	1	0	0	0	0	0	0	0	0	0	0	0
0,14,14,15	0	0	1	0	0	0	0	0	0	0	0	0	0	0	0	0	0	0	0	0	0
0,14,14,2	0	0	0	0	0	0	0	0	0	0	0	0	0	1	0	0	0	0	0	0	0
0,-14,-17,-12	0	0	0	0	0	0	0	0	0	0	0	0	0	0	0	1	0	0	0	0	0
0,14,17,15	0	0	0	1	0	0	0	0	0	0	0	0	0	0	0	0	0	0	0	0	0
0,-14,-17,-17	0	0	0	0	0	0	0	0	0	0	0	0	0	0	0	0	0	1	0	0	0
0,14,19,19	0	0	0	0	0	0	0	0	1	0	0	0	0	0	0	0	0	0	0	0	0
0,14,26,26	0	0	0	0	0	0	0	0	0	0	0	0	0	0	0	0	0	0	0	1	0
0,14,4,2	0	0	0	0	0	0	0	0	0	0	0	0	0	1	0	0	0	0	0	0	0
0,14,4,9	0	0	0	0	0	0	0	0	0	0	0	0	0	0	0	0	0	0	1	0	0
0,-14,-5,-14	0	0	0	0	0	0	0	0	1	0	0	0	0	0	0	0	0	0	0	0	0
0,-14,-9,-4	0	0	0	0	0	0	0	0	0	1	0	0	0	0	0	0	0	0	0	0	0
0,-15,-10,-5	0	1	0	0	0	0	0	0	0	0	0	0	0	0	0	0	0	0	0	0	0
0,15,12,19	0	0	0	0	0	0	0	0	0	0	0	1	0	0	0	0	0	0	0	0	0
0,-15,-12,-24	0	0	0	0	0	0	0	0	0	0	0	0	0	0	0	0	0	0	0	0	1
0,15,13,14	1	0	0	0	0	0	0	0	0	0	0	0	0	0	0	0	0	0	0	0	0
0,15,14,14	0	0	0	1	0	0	0	0	0	0	0	0	0	0	0	0	0	0	0	0	0
0,15,14,7	0	0	0	0	0	0	0	0	1	0	0	0	0	0	0	0	0	0	0	0	0
0,-15,-17,0	0	0	0	0	0	0	0	0	0	0	0	0	0	0	0	0	0	0	0	1	0
0,15,20,21	0	0	0	0	0	0	0	0	0	0	1	0	0	0	0	0	0	0	0	0	0
0,-15,-8,-10	0	1	0	0	0	0	0	0	0	0	0	0	0	0	0	0	0	0	0	0	0
0,-15,-9,-9	0	0	0	0	0	0	0	0	0	0	0	0	0	1	0	0	0	0	0	0	0
0,16,11,14	0	0	0	0	0	0	0	0	0	0	0	0	1	0	0	0	0	0	0	0	0
0,-16,-11,-15	0	0	0	0	0	0	0	0	0	1	0	0	0	0	0	0	0	0	0	0	0
0,-16,-11,-8	0	0	0	0	0	0	0	0	1	0	0	0	0	0	0	0	0	0	0	0	0
0,-16,-14,-12	0	0	0	0	0	0	0	0	1	0	0	0	0	0	0	0	0	0	0	0	0
0,16,15,10	0	0	0	0	0	0	0	0	1	0	0	0	0	0	0	0	0	0	0	0	0
0,-16,-15,-12	0	0	0	0	0	0	0	0	0	0	0	1	0	1	0	0	0	0	0	0	0
0,16,18,23	0	0	0	0	0	0	0	0	0	0	0	0	0	0	0	1	0	0	0	0	0
0,16,26,26	0	0	0	0	0	0	0	0	0	0	0	0	0	0	0	0	1	0	0	0	0
0,-16,-7,-11	0	0	0	0	0	1	0	0	0	0	0	0	0	0	0	0	0	0	0	0	0
0,-16,-8,-15	0	0	0	1	0	0	0	0	0	0	0	0	0	0	0	0	0	0	0	0	0
0,-17,-12,-10	0	0	0	0	0	0	0	0	1	0	0	0	0	0	0	0	0	0	0	0	0
0,-17,-12,-8	0	0	0	0	0	0	0	0	0	0	1	0	0	0	0	0	0	0	0	0	0
0,17,13,10	0	0	0	0	1	0	0	0	0	0	0	0	0	0	0	0	0	0	0	0	0
0,17,14,10	0	0	0	0	0	0	0	0	0	0	0	0	1	0	0	0	0	0	0	0	0
0,-17,-15,-10	0	0	0	0	0	0	0	0	0	0	0	0	0	0	0	0	0	1	0	0	0
0,-17,-15,-12	0	0	0	0	0	0	0	0	0	0	0	0	0	0	0	0	0	0	0	1	0
0,-17,-15,-13	0	0	0	0	0	0	0	0	0	0	0	0	0	0	0	0	0	0	0	0	1
0,17,16,17	0	0	0	0	0	0	0	0	0	0	0	0	0	0	0	0	0	0	0	0	1
0,17,17,15	0	0	0	0	0	0	0	0	0	0	0	0	0	0	0	0	0	0	0	0	1
0,17,17,17	0	0	0	0	0	0	0	0	0	0	0	0	0	0	1	0	0	0	0	0	0
0,-17,-2,-4	1	0	0	0	0	0	0	0	0	0	0	0	0	0	0	0	0	0	0	0	0
0,17,5,17	0	0	0	0	0	0	0	0	0	0	0	0	0	0	0	0	0	0	0	1	0
0,17,5,19	0	0	0	0	0	0	0	0	0	0	0	0	0	1	0	0	0	0	0	0	0
0,18,12,16	0	0	0	0	0	0	0	0	0	1	0	0	0	0	0	0	0	0	0	0	0
0,18,17,13	0	0	0	0	0	0	0	0	0	0	0	0	0	0	0	0	0	0	0	1	0
0,-18,-17,-16	0	0	0	0	0	0	0	0	0	0	0	0	0	0	0	0	0	0	0	1	0
0,18,19,20	0	0	0	0	0	0	0	0	0	0	1	0	0	0	0	0	0	0	0	0	0
0,18,22,18	0	0	0	0	0	0	0	0	0	0	0	0	0	0	0	0	0	1	0	0	0
0,-19,-15,-12	0	0	0	0	0	0	0	0	0	0	0	0	0	0	0	1	0	0	0	0	0
0,19,16,13	1	0	0	0	0	0	0	0	0	0	0	0	0	0	0	0	0	0	0	0	0
0,19,17,14	0	0	0	0	1	0	0	0	0	0	0	0	0	0	0	0	0	0	0	0	0
0,-19,-17,-15	0	0	0	0	0	0	0	0	0	0	0	0	0	0	0	1	0	0	0	0	0
0,19,17,22	0	0	0	0	0	0	0	0	0	0	0	0	0	0	0	0	0	0	0	1	0
0,19,17,9	0	0	0	0	0	0	0	0	0	0	0	0	0	0	0	0	0	1	0	0	0
0,2,0,0	0	0	0	0	0	0	0	0.2	0.4375	0	0	0.0666667	0	0	0	0.103448	0.142857	0.0909091	0	0	0.0714286
0,-2,0,0	0	0	0	0.2	0	0	0	0.75	0.0526316	0	0.272727	0	0	0	0	0.125	0.125	0	0	0	0
0,2,0,1	0	0	0	0	0	0	0	0	0.0625	0	0.2	0	0	0.125	0	0	0.142857	0	0	0	0
0,2,0,-1	0.166667	0.357143	0	1	0.6	0.333333	0.333333	0	0.125	0	0.2	0.133333	0	0.25	0	0	0	0	0	0.230769	0.142857
0,-2,0,1	0	0.1	0	0.4	0.166667	0	0.142857	0	0.0526316	0.333333	0.0909091	0	0	0	0	0.1875	0	0	0.125	0.266667	0.0909091
0,-2,0,-1	0	0	0	0	0	0	0	0	0	0	0	0	0	0	0	0	0	0	0.125	0	0
0,2,0,-10	0	0	0	0	0	0	0	0	0	0	0	0	0	0	0	0	0	0	0	0.0769231	0
0,-2,0,10	0	0	0	0	0	0	0	0	0	0	0	0	0	0	0	0	0	0	0.125	0	0
0,-2,0,-10	0	0	0	0	0	0	0	0	0	0	0	0.0625	0	0	0	0	0	0	0	0	0
0,2,0,12	0	0	0	0	0	0	0	0	0	0	0	0	0	0	0	0	0	0	0.2	0	0
0,2,0,-12	0	0	0	0	0	0	0.111111	0	0	0	0	0	0	0	0	0	0	0	0	0	0
0,-2,0,12	0	0	0	0	0	0	0	0	0	0	0.0909091	0	0	0	0	0	0	0	0	0	0.0909091
0,-2,0,-14	0	0	0	0	0	0	0	0	0	0	0	0	0	0	0	0	0	0.111111	0	0	0
0,-2,0,15	0	0	0	0	0	0	0	0	0	0	0.0909091	0.0625	0	0	0	0	0	0	0	0	0
0,2,0,-17	0	0	0	0	0	0	0	0	0	0	0	0	0	0	0	0	0	0	0	0.0769231	0
0,2,0,2	0.0833333	0.214286	0.6	0	0.2	0	0	0	0.125	0	0	0.2	0	0.25	0	0.241379	0.285714	0.181818	0.4	0.230769	0.0714286
0,2,0,-2	0	0.142857	0	0	0.2	0	0.444444	0.2	0.1875	0.75	0.4	0.2	0.2	0	0.5	0.275862	0	0	0	0.0769231	0.428571
0,-2,0,2	0	0.1	0.25	0	0	0.5	0.142857	0	0.0526316	0.666667	0.181818	0.1875	0.2	0.25	0.428571	0.59375	0	0	0.125	0.2	0.181818
0,-2,0,-2	0.5	0.6	0.25	0.4	0.5	0.5	0.714286	0	0.684211	0	0.0909091	0.4375	0.6	0.75	0	0.03125	0.25	0.555556	0.125	0	0.545455
0,2,0,23	0	0	0	0	0	0	0	0	0	0	0	0	0	0	0	0	0	0.0909091	0	0	0
0,2,0,-24	0	0	0	0	0	0	0	0	0	0	0	0	0	0	0.5	0	0	0	0	0	0
0,2,0,3	0.0833333	0	0.2	0	0	0	0	0	0	0	0.2	0	0	0	0	0	0.142857	0	0	0	0.0714286
0,2,0,-3	0.25	0.0714286	0.2	0	0	0.666667	0	0.2	0	0.25	0	0	0.6	0.25	0	0	0.285714	0.545455	0.2	0.307692	0.142857
0,-2,0,3	0	0	0	0	0	0	0	0	0	0	0	0.125	0.2	0	0.142857	0.0625	0.125	0.222222	0	0.2	0
0,-2,0,-3	0	0	0.25	0	0	0	0	0	0.0526316	0	0.0909091	0.0625	0	0	0.142857	0	0.125	0	0.125	0.0666667	0
0,2,0,4	0.333333	0.142857	0	0	0	0	0.111111	0	0	0	0	0.133333	0	0	0	0.0689655	0	0.0909091	0	0	0
0,2,0,-4	0	0	0	0	0	0	0	0.2	0	0	0	0	0.2	0	0	0.103448	0	0	0	0	0
0,-2,0,4	0	0	0	0	0.166667	0	0	0	0	0	0.0909091	0	0	0	0.142857	0	0	0.111111	0	0.0666667	0
0,-2,0,-4	0	0.1	0.25	0	0	0	0	0	0.0526316	0	0	0	0	0	0.142857	0	0.125	0	0	0.2	0
0,2,0,-5	0	0.0714286	0	0	0	0	0	0	0.0625	0	0	0.0666667	0	0.125	0	0.0344828	0	0	0.2	0	0
0,-2,0,5	0	0	0	0	0	0	0	0	0	0	0	0.0625	0	0	0	0	0	0	0	0	0
0,-2,0,-5	0.5	0.1	0	0	0	0	0	0	0	0	0	0	0	0	0	0	0.125	0	0.25	0	0.0909091
0,2,0,6	0	0	0	0	0	0	0	0	0	0	0	0	0	0	0	0	0	0	0	0	0.0714286
0,2,0,-6	0	0	0	0	0	0	0	0	0	0	0	0.0666667	0	0	0	0	0	0	0	0	0
0,-2,0,6	0	0	0	0	0	0	0	0.25	0	0	0	0	0	0	0	0	0	0	0	0	0
0,-2,0,-6	0	0	0	0	0.166667	0	0	0	0	0	0	0	0	0	0	0	0	0	0	0	0
0,2,0,7	0.0833333	0	0	0	0	0	0	0	0	0	0	0.0666667	0	0	0	0	0	0	0	0	0
0,2,0,-7	0	0	0	0	0	0	0	0.2	0	0	0	0	0	0	0	0.137931	0	0	0	0	0
0,-2,0,-7	0	0	0	0	0	0	0	0	0	0	0	0	0	0	0	0	0.125	0	0	0	0
0,2,0,9	0	0	0	0	0	0	0	0	0	0	0	0.0666667	0	0	0	0	0	0	0	0	0
0,2,0,-9	0	0	0	0	0	0	0	0	0	0	0	0	0	0	0	0.0344828	0	0	0	0	0
0,-2,0,-9	0	0	0	0	0	0	0	0	0.0526316	0	0	0	0	0	0	0	0	0	0	0	0
0,2,1,0	0.5	0	0	0	0	0	0	0	1	0.333333	0.142857	0	0	0	0	0	0	0	0	0	0
0,2,-1,0	1	0	0	0.5	0.5	0	0	0	0.6	0	0	0	0	1	0	0	0	0	0	0.333333	0.333333
0,-2,1,0	1	0.5	0.5	0	0	0	0	0	1	0	1	0	0.5	0	0	0	0	0	0	0	0.5
0,-2,-1,0	0.166667	0	0.333333	0	0	0.0909091	0.142857	0	0	0	0.166667	0	0	0	0	0	0	0	0	0	0
0,2,1,-1	0	0	0	0	0	0	0	0	0	0.333333	0.714286	0	0	0.5	0	0	0	0	0	0	0
0,2,-1,1	0	0	0	0	0	0	0	0	0.2	0	0	0	0	0	0	0.142857	0	0	0	0.333333	0.333333
0,-2,1,1	0	0	0	0.333333	0	0	0	0	0	0	0	1	0	0	0	0	0	0	0	0	0
0,-2,1,-1	0	0	0	0	0	1	0	0	0	0	0	0	0.25	0	0	0	1	0	0	0	0
0,-2,-1,-1	0	0	0	0	0	0	0	0	0	0.5	0	0	0	0	0	0	0	0	0	0	0
0,-2,-1,10	0	0.5	0	0	0	0.0909091	0	0	0	0	0	0	0	0	0	0	0	0	0	0	0
0,-2,-1,-10	0	0	0	0.2	0	0	0	0	0	0	0	0	0	0	0	0	0	0	0	0	0
0,-2,-1,11	0	0	0	0	0	0	0	0	0	0	0.166667	0	0	0	0	0	0	0	0	0	0
0,2,1,2	0.5	0	0	0	0	0	0	0	0	0	0	0	0	0	0	0	0	0	0	0	0.5
0,2,-1,2	0	0	0	0	0	0	0	0	0	0	0	0	0	0	0.666667	0	0.166667	0	0	0	0.333333
0,2,-1,-2	0	0	0	0.5	0	0.666667	0.333333	0	0	0	0.5	0	0	0	0	0.142857	0	0	0	0	0
0,-2,1,-2	0	0.5	0.5	0.333333	0	0	0	0	0	0	0	0	0	0	0	0	0	0	0	0	0
0,-2,-1,2	0.166667	0	0	0.2	0	0.181818	0	0	0.5	0	0	0	0	0	0	0	0	0	1	0	0
0,-2,-1,-2	0.166667	0	0	0	0	0	0	1	0.5	0	0.166667	0	0.5	0.5	0	0	0	0	0	0	0
0,2,1,3	0	0	0	0	0	0	0	0	0	0	0.142857	0	0	0	0	0.5	0	0	0	0	0
0,2,1,-3	0	0	0	0	0	0	0	0	0	0	0	0	0	0	1	0	0	0	1	0	0
0,2,-1,-3	0	0	0	0	0	0.333333	0.666667	0	0	0	0	1	0	0	0	0	0.166667	0	0.333333	0	0
0,-2,1,3	0	0	0	0	0	0	0	0	0	0	0	0	0	0	0	0	0	1	1	0	0
0,-2,1,-3	0	0	0	0.333333	0	0	0	0	0	0	0	0	0	0	0	0	0	0	0	0	0
0,-2,-1,3	0	0	0	0	0	0	0.142857	0	0	0	0	0	0	0.25	0	0	0	0	0	0	0
0,-2,-1,-3	0.166667	0.25	0.333333	0.4	0.2	0.0909091	0.285714	0	0	0	0.166667	0	0.5	0	0	0	1	0	0	0	0
0,2,1,4	0	0	0	0	0	0	0	0	0	0.333333	0	0	0	0	0	0.5	0	0	0	0	0.5
0,2,1,-4	0	0	0	0	0	0	0	0	0	0	0	0	0	0.5	0	0	0	0	0	0	0
0,2,-1,4	0	0	0	0	0	0	0	0	0	0	0	0	0	0	0	0	0.166667	0	0.166667	0	0
0,2,-1,-4	0	0	0	0	0	0	0	0	0	0.5	0	0	0	0	0	0	0.166667	0	0.166667	0	0
0,-2,1,-4	0	0	0	0	0	0	0	0	0	0	0	0	0.25	1	0	0	0	0	0	0	0
0,-2,-1,4	0	0	0	0	0.2	0.181818	0	0	0	0	0	0	0	0	0	0	0	0	0	0	0
0,-2,-1,-4	0	0.25	0	0.2	0	0.0909091	0.285714	0	0	0	0.333333	0	0	0	1	0	0	0	0	0	0
0,2,1,5	0	0	0	0	0	0	0	0	0	0	0	0	0	0	0	0	0	0	0	1	0
0,2,-1,-5	0	0	1	0	0.5	0	0	0	0	0.5	0.5	0	0	0	0.333333	0.714286	0.333333	0	0.166667	0.333333	0
0,-2,1,5	0	0	0	0	1	0	0	0	0	0	0	0	0	0	0	0	0	0	0	1	0.5
0,-2,-1,-5	0.333333	0	0	0	0.4	0.0909091	0	0	0	0	0	0	0	0	0	0	0	0	0	0	1
0,2,-1,6	0	0	0	0	0	0	0	0	0	0	0	0	0	0	0	0	0	0	0.166667	0	0
0,-2,-1,6	0	0	0.333333	0	0	0	0.142857	0	0	0	0	0	0	0	0	0	0	0	0	0	0
0,-2,-1,-6	0	0	0	0	0	0.0909091	0	0	0	0.5	0	0	0	0	0	0	0	0	0	0	0
0,-2,-1,7	0	0	0	0	0.2	0	0	0	0	0	0	0	0	0.25	0	0	0	0	0	0	0
0,2,-1,-8	0	0	0	0	0	0	0	0	0.2	0	0	0	0	0	0	0	0	0	0	0	0
0,-2,-1,-9	0	0	0	0	0	0.0909091	0	0	0	0	0	0	0	0	0	0	0	0	0	0	0
0,2,-10,0	0	0	0	0	0	0	0	0	0	0	0	0	0	0	0	0	0	0	0	1	0
0,-2,10,-1	0	0	0	0	0	0	0	0	0	0	0	0	0	0.333333	0	0	0	0	0	0	0
0,2,10,10	0	0.5	0	0	0	0	0	0	0	0	0	0	0	0	0	0	0	0	0	0	0
0,-2,10,10	0	0	0	0	0	0	0	0	0	0	0	0	0	0.333333	0	0	0	0	1	0	0
0,2,10,11	0	0.5	0	0	0	0	0	0	0	0	0	0	0	0	0	0	0	0	0	0	0
0,-2,-10,-12	0	0	0	0	0	0	0	0	0	0	0	0	0	0	1	0	0	1	0	0	0
0,2,-10,2	0	0	0	0	0	0	0	0	0	0	0	0	0	0	0	0	0	0	0	0	1
0,-2,-10,-2	0	0	0	0	0	0	0	0	0	0	0	0	0	0	0	1	0	0	0	0	0
0,2,-10,4	0	0	0	0	0	0	0	0	0	0	0	0	0	0	0	0	0	0	1	0	0
0,2,-10,-5	0	0	0	0	0	0	0	0	1	0	0	0	0	0	0	0	0	0	0	0	0
0,-2,10,5	0	0	0	0	0	0	0	0	0	0	0	0	0	0.333333	0	0	0	0	0	0	0
0,-2,-10,-5	0	0	0	0	0	0	0.333333	0	0	0	0	0	0	0	0	0	0	0	0	0	0
0,-2,-10,-7	1	0	0	0	1	1	0.666667	0	0	0	0	0	0	0	0	0	0	0	0	0	0
0,-2,10,9	0	0	0	0	0	0	0	0	0	0	0	0	0	0	0	0	0	0	0	1	0
0,2,11,14	0	0	0	0	0	0	0	0	0	0	0	0	0	0	0	0	0	1	0	0	0
0,-2,-11,-3	0	0	0	0	0	0	0	0	0	0	0	0	0	0	0	0	1	0	0	0	0
0,2,11,-5	0	0	0	0	0	0	0	0	1	0	0	0	0	0	0	0	0	0	0	0	0
0,-2,11,8	0	0	0	0	1	0	0	0	0	0	0	0	0	0	0	0	0	0	0	0	0
0,-2,-11,-8	0	0	0	0	0	0	0	0	0	0	0	0	0	0	1	1	0	0	0	0	0
0,-2,11,9	0	1	0	0	0	1	0	0	0	0	0	0	0	0	0	0	0	0	0	0	0
0,2,12,10	0	0	0	0	0	0	1	0	0	0	0	0	0	0	0	0	0	0	0	0	0
0,2,-12,-15	0	0	0	0	0	0	0	0	0	0	0	0	0	0	0	1	0	1	0	0	0
0,2,-12,2	0	0	0	0	0	0	0	0	0	0.5	0	0	0	0	0	0	0	0	0	0	0
0,2,12,7	0	0	0	0	0	0	0	0	0	0	0	0	0	0	0	0	0	0	1	0	0
0,2,-12,-7	0	0	0	0	0	0	0	0	0	0.5	0	0	0	0	0	0	0	0	0	0	0
0,-2,-12,-7	0	0	0	0	0	0	0	0	0	0	0	0	0	1	0	0	0	0	0	0	0
0,-2,12,8	0	0	0	0	1	0	0	0	0	0	0	0	0	0	0	0	0	0	0	0	0
0,-2,-12,-9	0	0	1	0	0	0	0	0	0	0	0	0	0	0	0	0	0	0	0	1	0
0,2,13,12	0	0	0	0	0	0	0	0	0	0	0	0	0	1	0	0	0	0	0	0	0
0,2,-13,-8	0	1	0	0	0	0	0	0	0	0	0	0	0	0	0	0	0	0	0	0	0
0,-2,-14,-10	0	0	0	0	0	0	1	0	0	0	0	0	0	0	0	0	1	0	0	0	0
0,2,14,11	0	0	0	0	0	0	0	0	0	0	1	0	0	0	0	0	0	0	0	0	0
0,2,14,17	0	0	0	0	0	0	0	0	0	0	0	0	0	0	0	0	0	0	0	0	1
0,-2,-14,-3	0	0	0	0	0	0	0	0	0	1	0	0	0	0	0	0	0	0	0	0	0
0,-2,-14,-7	0	0	0	0	0	0	0	0	0	0	0	0	0	0	0	0	0	0	1	0	0
0,2,-15,-10	0	0	0	0	0	0	0	0	0	0	1	0	0	0	0	0	0	0	0	0	0
0,-2,-15,-11	0	0	0	1	0	0	0	0	0	0	0	0	0	0	0	0	0	0	0	0	0
0,2,15,19	0	0	0	0	0	0	0	0	0	0	0	0	0	0	1	0	0	0	0	0	0
0,-2,15,3	0	0	0	0	0	0	0	0	0	0	0	0	0	0	0	0	0	0	0	1	0
0,-2,-17,-10	0	1	0	0	0	0	0	0	0	0	0	0	0	0	0	0	0	0	0	0	0
0,2,17,14	0	0	0	0	0	0	0	0	0	0	0	1	0	0	0	0	0	0	0	0	0
0,-2,-17,-14	0	0	0	0	0	0	0	0	0	0	0	0	0	0	0	0	0	0	0	0	1
0,2,17,22	0	0	0	0	0	0	0	0	0	0	1	0	0	0	0	0	0	0	0	0	0
0,2,-19,-15	0	0	0	0	0	0	0	0	0	0	0	0	0	0	0	0	0	0	0	0	1
0,-2,-19,-17	0	0	0	0	0	0	0	0	0	0	0	0	0	0	0	0	0	1	0	1	0
0,2,19,19	0	0	0	0	0	0	0	0	0	0	0	0	0	0	1	0	0	0	0	0	0
0,2,2,0	0	0	0.25	0	0	0	0	0.333333	0	0	0.2	1	0.4	0	0	0.1	0	0.333333	1	0	0
0,2,-2,0	0	0	0	1	0	0	0	0	0.5	1	0	0	0	0	0	0.25	0	0	0	0.444444	0.5
0,-2,2,0	0	0	0	0	0	0	0	0	0	1	1	0.25	0	0	0	0.875	0.714286	0.666667	0.8	0.333333	0.75
0,-2,-2,0	0.5	0.5	0.333333	0	0	0	0	0	0	0.25	0	0	0	0	0	0.5	0.25	0	0.571429	0	0
0,2,2,-1	0	0	0.25	0	0	0	0	0.166667	0	0	0	0	0	0	0	0	0.5	0	0	0	0
0,2,-2,1	0	0	0	0	0	0	0	0	0	0	0	0	0	0	0	0	0	0	0	0	0.333333
0,2,-2,-1	0.5	0	0	0	0	0	0	0	0	0	0	0	0	0	0	0	0	0	0	0	0
0,-2,2,1	0	0.25	0	0	0	0	0	0	0.666667	0	0	0	0	0	0	0	0.142857	0	0	0	0
0,-2,-2,1	0	0.5	0	0	0	0	0	0	0	0	0	0	0	0	0	0	0	0.5	0.142857	0	0.142857
0,-2,-2,-1	0	0	0.333333	0	0	0	0	0	0	0	0.2	0	0	0	0	0	0	0	0	0	0
0,2,2,-10	0	0	0	0	0	0	0	0.166667	0	0	0	0	0	0	0	0	0.5	0	0	0	0
0,2,-2,10	0	0	0	0	0	0	0	0	0.166667	0	0	0	0	0	0	0	0	0	0	0	0
0,-2,2,10	0	0	0	0	0	0	0	0	0	0	0	0	0	0	0	0	0	0.333333	0	0	0
0,-2,-2,-10	0	0	0	0	0	0	0	0	0	0	0	0	0	0	1	0	0	0	0	0	0
0,-2,-2,-14	0	0	0	0	0	0	0	0	0	0.25	0	0	0	0	0	0	0	0	0	0	0
0,2,2,-15	0	0	0	0	0	0	0	0	0	0	0	0	0	0	0	0	0	0	0	0	0.333333
0,2,2,2	0	0	0	0	0	0	0	0.166667	0	0	0	0	0.4	0	0	0.25	0	0.333333	0	0	0
0,2,2,-2	0	0	0	0.5	0	0	0	0	0	0	0	0	0	0	0	0	0	0	0	0	0
0,2,-2,2	0	0	0	0	0	0	0	0.5	0	0	0	0	1	0	0.2	0	0.25	0	1	0	0
0,2,-2,-2	0	0	0.5	0	0	0	0	0	0.166667	0	0	0	0	0	0	0	0	0	0	0	0
0,-2,2,2	0	0	0	0	0	0	0	0	0	0	0	0.75	0	0	0	0	0	0	0	0	0
0,-2,2,-2	0.8	0	0	0	0	0	0	0	0	0	0	0	0	0	0	0	0.142857	0	0	0	0
0,-2,-2,2	0.5	0	0	0	0	0	0	0	0	0	0	0	0	0	0	0	0	0	0.285714	0	0.571429
0,-2,-2,-2	0	0	0	0	0	0	0	0	0	0.25	0.4	0.333333	0.5	0	0	0.25	0.25	0.25	0	0	0.142857
0,2,2,3	0	0.666667	0.25	0.5	0	0	0	0	0.4	0	0.8	0	0	1	0	0.15	0	0.333333	0	0.333333	0.333333
0,2,-2,-3	0	0	0	0	0	0	0	0	0	0	0	0	0	0	0	0	0	0	0	0.111111	0
0,-2,2,3	0	0.5	0	0	0	0	0	0	0	0	0	0	0	0	0	0	0	0	0	0	0.25
0,-2,-2,3	0	0	0	0	0	0	0	0	0	0	0	0.333333	0	1	0	0	0	0	0	0	0
0,-2,-2,-3	0	0	0	0	0	0	0	0	0.444444	0	0.4	0	0	0	0	0	0	0	0	0	0
0,2,2,4	0	0	0.25	0	0	0	0	0	0.2	0	0	0	0	0	0	0.4	0	0	0	0	0
0,2,2,-4	0	0.333333	0	0	0	0	0	0	0	0	0	0	0	0	0	0	0	0	0	0	0
0,2,-2,-4	0	0	0	0	0	0	0	0	0	0	0	0	0	0	0.4	0.5	0	0	0	0.111111	0
0,-2,2,4	0	0	0	0	0	0	0	0	0	0	0	0	0	0	0	0.125	0	0	0	0	0
0,-2,2,-4	0	0	0	0	0	0	0	0	0	0	0	0	0	0	0	0	0	0	0.2	0	0
0,-2,-2,-4	0	0	0	0	0	0	0	0	0.444444	0	0	0.333333	0.5	0	0	0	0.25	0.25	0	0	0
0,2,2,5	0	0	0	0	1	0	0	0	0.2	0	0	0	0	0	0	0.05	0	0	0	0	0.333333
0,2,2,-5	0	0	0	0	0	0	0	0	0	0	0	0	0	0	0	0	0	0	0	0.333333	0
0,2,-2,5	0	0	0	0	0	0	0	0	0	0	0	0	0	0	0	0.125	0	0	0	0	0
0,2,-2,-5	0.5	1	0.5	0	1	0	0	0.5	0	0	0	1	0	0	0.2	0.125	0.5	0	0	0.222222	0.166667
0,-2,2,5	0.2	0.25	0	0	0	0	0.75	0	0.333333	0	0	0	0	0	0	0	0	0	0	0.333333	0
0,-2,-2,-5	0	0	0.333333	1	0	0	0	0	0	0	0	0	0	0	0	0.125	0.25	0	0	1	0.142857
0,2,-2,6	0	0	0	0	0	0	0	0	0.166667	0	0	0	0	0	0	0	0	0	0	0	0
0,-2,-2,-6	0	0	0	0	0	0	0	0	0	0.25	0	0	0	0	0	0	0	0	0	0	0
0,2,2,7	0	0	0	0	0	0	0	0	0	0	0	0	0.2	0	0	0.05	0	0	0	0.333333	0
0,2,2,-7	0	0	0	0	0	0	0	0	0.2	0	0	0	0	0	0	0	0	0	0	0	0
0,2,-2,7	0	0	0	0	0	0	0	0	0	0	0	0	0	0	0.2	0	0	0	0	0	0
0,2,-2,-7	0	0	0	0	0	0	0	0	0	0	0	0	0	0	0	0	0.25	0	0	0.111111	0
0,-2,2,7	0	0	0	0	0	0	0.25	0	0	0	0	0	0	0	0	0	0	0	0	0.333333	0
0,-2,-2,-7	0	0	0	0	0	0	0	0	0.111111	0	0	0	0	0	0	0	0	0	0	0	0
0,-2,-2,8	0	0	0	0	0	0	0	1	0	0	0	0	0	0	0	0	0	0	0	0	0
0,-2,-2,-8	0	0	0	0	0	0	0	0	0	0	0	0	0	0	0	0.125	0	0	0	0	0
0,2,2,9	0	0	0	0	0	0	0	0.166667	0	0	0	0	0	0	0	0	0	0	0	0	0
0,2,20,24	0	0	0	0	0	0	0	0	0	0	0	0	0	0	0	0	0	1	0	0	0
0,-2,21,14	0	0	0	0	0	0	0	0	0	0	0	0	0	0	0	0	0	1	0	0	0
0,-2,21,20	0	0	0	0	0	0	0	0	0	0	1	0	0	0	0	0	0	0	0	0	0
0,-2,21,22	0	0	0	0	0	0	0	0	0	0	0	0	0	0	0	1	0	0	0	0	0
0,-2,-22,-17	0	0	0	0	0	0	0	0	1	0	0	0	0	0	0	0	0	0	0	0	0
0,2,-22,-19	0	0	0	0	0	0	0	0	0	0	0	0	0	0	1	0	0	0	0	0	0
0,2,-22,-22	0	0	0	0	0	0	0	0	0	0	0	0	0	0	0	0	0	1	0	0	0
0,-2,-26,-24	0	0	0	0	0	0	0	0	0	0	0	0	0	0	1	0	0	0	0	0	0
0,2,3,0	0.166667	0.03125	0	0.0555556	0	0	0	0	0.0714286	0	0	0	0	0.214286	0	0.0769231	0	0	0.5	0	0
0,2,-3,0	0	1	1	0	0	0	0.5	0	0	0.666667	0	0.5	0	0	0.666667	0	0	0	0.714286	0	1
0,-2,3,0	0	0.125	0	0	0	0	0	0	0	0	0.25	0	0	0	0.428571	0.333333	0.5	0	0	0	0.25
0,-2,-3,0	0.2	0.04	0	0	0.0833333	0.176471	0.172414	0	0.047619	0.1	0	0.25	0	0.0714286	0	0	0	0	0	0	0
0,2,3,1	0.0333333	0	0	0.0555556	0	0.117647	0	0	0	0	0	0	0	0	0	0.0769231	0	0	0	0	0
0,2,3,-1	0	0	0	0.111111	0.2	0.0588235	0.0666667	0	0	0	0	0	0	0.0714286	0	0	0	0	0	0	0
0,2,-3,1	0	0	0	0	0	0	0	0	0	0	0	0	0	0	0	0	0.333333	0	0	0	0
0,2,-3,-1	0	0	0	0	0	0	0	0	0	0.333333	0.5	0	0	0	0	0	0	0	0	0	0
0,-2,3,1	0	0.625	1	0	0	1	0	0	0	0	0.25	0	0.666667	0.5	0	0	0	0.333333	0.5	0.333333	0.5
0,-2,3,-1	0	0	0	0	0	0	0	0	0	1	0	0	0.333333	0	0	0	0	0	0.25	0.166667	0.25
0,-2,-3,1	0	0	0	0	0	0	0	0	0	0	0.05	0	0	0	0	0.125	0	0	0	0	0.25
0,-2,-3,-1	0	0	0.222222	0	0	0	0	0	0.047619	0	0.25	0	0	0	0.5	0	0	0	0	0	0
0,2,-3,-10	0	0	0	0	0	0	0	0	0.2	0	0	0	0	0	0	0	0	0	0	0	0
0,-2,-3,-10	0	0	0	0	0	0	0	0	0	0	0	0	0	0.0714286	0	0	0	0	0	0	0
0,2,3,11	0.0333333	0	0	0	0	0	0	0	0	0	0	0	0	0	0	0	0	0	0	0	0
0,2,-3,-15	0	0	0	0	0	0	0	0	0.2	0	0	0	0	0	0	0	0	0	0	0	0
0,2,3,-16	0	0	0	0	0	0	0	0	0	0	0	0	0	0	0	0.0769231	0	0	0	0	0
0,2,3,19	0	0	0	0	0	0	0	0	0	0	0	0	0.25	0	0	0	0	0	0	0	0
0,2,3,2	0.0666667	0.0625	0.272727	0.0555556	0	0.235294	0.466667	0	0	0.153846	0.333333	1	0	0.142857	0	0.153846	0	0	0	0.2	0.666667
0,2,-3,2	0	0	0	0	0	0	0	0	0	0	0	0	0	0	0.333333	0	0.666667	0	0.285714	1	0
0,2,-3,-2	1	0	0	0	0	0	0	0	0	0	0	0	0	0	0	0	0	0	0	0	0
0,-2,3,2	0	0	0	0	0	0	1	0	0.75	0	0.25	0	0	0	0	0	0	0.333333	0	0	0
0,-2,3,-2	0	0	0	0	0	0	0	0	0	0	0	0	0	0	0.142857	0	0.25	0	0	0	0
0,-2,-3,2	0	0	0.111111	0	0.0833333	0.0588235	0	0	0.333333	0	0.05	0	0	0	0	0	0.166667	0	0.5	0	0
0,-2,-3,-2	0.3	0.16	0.111111	0.363636	0.166667	0	0.310345	0	0	0.1	0	0	0.0714286	0.142857	0.5	0.125	0.333333	0	0	0.375	0.25
0,2,3,3	0	0.0625	0	0.111111	0	0	0	0	0	0	0	0	0	0	0.5	0.153846	0	0	0	0	0
0,2,3,-3	0.0333333	0	0	0	0	0	0	0	0	0	0.0666667	0	0	0.142857	0	0	0	0	0	0	0
0,2,-3,3	0	0	0	0	0	0	0	0	0	0	0	0	0	1	0	0	0	0	0	0	0
0,2,-3,-3	0	0	0	0	0	0	0	0	0	0	0.5	0	0	0	0	0	0	0	0	0	0
0,-2,3,3	0	0	0	0	1	0	0	0	0	0	0	0	0	0	0	0.333333	0	0	0	0.166667	0
0,-2,-3,3	0	0	0	0	0	0	0.0344828	0	0.047619	0	0	0	0	0	0	0	0	0	0	0.125	0
0,-2,-3,-3	0	0.08	0	0	0.0833333	0	0	0	0	0.1	0	0.25	0.214286	0.0714286	0	0	0	0	0	0	0
0,2,3,4	0.166667	0.125	0	0.166667	0.4	0.235294	0.0666667	0	0	0.0769231	0.133333	0	0	0.142857	0.5	0	0	0	0	0.1	0
0,2,3,-4	0	0	0	0	0.2	0	0	0	0	0	0	0	0	0.0714286	0	0	0	0	0	0	0
0,-2,3,4	0	0.125	0	0	0	0	0	0	0	0	0.25	0	0	0	0	0.333333	0.25	0	0.25	0	0
0,-2,3,-4	0	0	0	0	0	0	0	0	0	0	0	0	0	0.5	0.142857	0	0	0	0	0	0
0,-2,-3,4	0	0	0	0	0	0	0	0	0	0	0	0	0	0	0	0	0.166667	0	0	0	0
0,-2,-3,-4	0.1	0.2	0	0.272727	0	0.294118	0.0689655	0	0.238095	0.2	0.2	0	0.214286	0.0714286	0	0.375	0	0	0	0	0
0,2,3,5	0.5	0.59375	0.727273	0.444444	0.2	0.352941	0.4	0	0.857143	0.769231	0.333333	0	0.75	0.142857	0	0.307692	0	0.5	0.5	0.5	0.333333
0,2,3,-5	0	0	0	0	0	0	0	0	0	0	0	0	0	0.0714286	0	0	0	0	0	0	0
0,2,-3,-5	0	0	0	0	0	0	0.5	0	0	0	0	0.5	0	0	0	0	0	0	0	0	0
0,-2,3,5	0	0	0	0	0	0	0	0	0.25	0	0	0	0	0	0.142857	0	0	0	0	0	0
0,-2,-3,5	0	0	0	0	0	0	0	0	0	0	0.05	0	0	0	0	0	0	0	0	0	0
0,-2,-3,-5	0.25	0.4	0.333333	0.272727	0.5	0.117647	0.275862	0	0.285714	0.5	0.3	0	0.5	0.428571	0	0.375	0.333333	1	0	0.375	0.5
0,2,3,6	0	0.09375	0	0	0	0	0	0	0	0	0.0666667	0	0	0	0	0	0.5	0	0	0	0
0,2,-3,-6	0	0	0	0	0	0	0	0	0.4	0	0	0	0	0	0	0	0	0	0	0	0
0,-2,3,6	0	0.125	0	0	0	0	0	0	0	0	0	0	0	0	0	0	0	0	0	0.166667	0
0,-2,-3,6	0	0	0	0.0909091	0	0	0	0	0	0	0	0	0	0	0	0	0	0	0	0	0
0,-2,-3,-6	0.05	0	0	0	0	0.176471	0.0689655	0	0	0	0.1	0	0	0.0714286	0	0	0	0	0.5	0.125	0
0,2,3,7	0	0.03125	0	0	0	0	0	0	0.0357143	0	0	0	0	0	0	0.153846	0	0.5	0	0	0
0,2,-3,-7	0	0	0	0	0	0	0	0	0	0	0	0	0	0	0	1	0	0	0	0	0
0,-2,3,-7	0	0	0	0	0	0	0	0	0	0	0	0	0	0	0	0	0	0.333333	0	0	0
0,-2,-3,7	0	0	0	0	0	0.176471	0	0	0	0	0	0	0	0	0	0	0	0	0	0	0
0,-2,-3,-7	0.05	0.04	0.222222	0	0	0	0.0344828	0	0	0	0	0.5	0	0.0714286	0	0	0	0	0	0	0
0,2,3,8	0	0	0	0	0	0	0	0	0.0357143	0	0	0	0	0	0	0	0.5	0	0	0.1	0
0,2,-3,-8	0	0	0	0	0	0	0	0	0.2	0	0	0	0	0	0	0	0	0	0	0	0
0,-2,3,8	0	0	0	0	0	0	0	0	0	0	0	0	0	0	0.142857	0	0	0	0	0.166667	0
0,-2,-3,-8	0.05	0.08	0	0	0.0833333	0	0.0344828	0	0	0	0	0	0	0	0	0	0	0	0	0	0
0,2,3,9	0	0	0	0	0	0	0	0	0	0	0.0666667	0	0	0	0	0	0	0	0	0	0
0,2,3,-9	0	0	0	0	0	0	0	0	0	0	0	0	0	0	0	0	0	0	0	0.1	0
0,-2,-32,-30	0	0	0	0	0	0	0	0	0	1	0	0	0	0	0	0	0	0	0	0	0
0,2,4,0	0	0.111111	0	0	0	0	0	0.5	0.03125	0.0571429	0	0.2	0.111111	0	0.214286	0.105263	0.2	0	0.25	0.214286	0.2
0,-2,4,0	0	0	0	0	0	0	0	0	0	0	0	0	0	0	0	0	0	0	0	0	0.25
0,-2,-4,0	0	0.05	0	0	0	0	0.142857	0	0	0.0714286	0	0.133333	0	0	0	0.121212	0.214286	0.1	0.307692	0.1	0.0833333
0,2,4,-1	0	0	0	0	0	0	0.125	0	0	0	0	0.2	0	0	0.214286	0	0.2	0	0	0	0
0,-2,4,1	0	0	0	0	0	0	0	0	0	0	0	0	0	0	0	0	0	0	0	0	0.25
0,-2,-4,1	0	0.05	0	0	0.1	0	0	0	0.0238095	0.0714286	0.142857	0	0.111111	0	0.363636	0.030303	0	0	0.0769231	0.1	0.0416667
0,-2,-4,-1	0	0.05	0	0	0	0	0	0	0.0238095	0	0	0	0	0	0	0	0	0	0.0769231	0	0
0,2,4,10	0	0	0	0	0	0	0	0	0	0	0.0909091	0	0	0	0	0	0	0	0	0	0
0,2,4,-10	0	0	0	0	0	0	0	0	0	0.0571429	0	0	0	0	0	0	0	0	0	0	0
0,2,4,11	0	0	0	0	0	0	0	0	0.03125	0	0	0	0	0	0	0	0	0	0	0	0
0,2,4,15	0	0	0	0	0	0	0	0	0	0	0	0	0	0.166667	0	0	0	0	0	0	0
0,-2,4,17	0	0	0	0	0	0	0	0	0	0	0	0	0	0	1	0	0	0	0	0	0
0,-2,-4,19	0	0	0	0	0	0	0	0	0	0	0	0	0	0	0	0.030303	0	0	0	0	0
0,2,4,2	0	0.111111	0	0	0	0	0	0.5	0	0.0285714	0.0909091	0.4	0	0	0.0714286	0.342105	0.2	1	0.25	0.285714	0.4
0,2,4,-2	0	0	0	0	0	0	0	0	0.03125	0	0	0	0	0.166667	0	0.0263158	0	0	0	0	0
0,2,-4,-2	0	0	0	0	0	0	0	0	1	0	0	0	1	0	0	0	0	0	0	0	0
0,-2,4,-2	0	0	0	0	0	0	0	0	0	0	0	0	0	0	0	0	0	0	0	0	0.25
0,-2,-4,2	0	0	0	0	0	0	0	0	0.0238095	0	0	0	0	0	0	0	0	0	0	0	0.0833333
0,-2,-4,-2	0	0.15	0	0.25	0.1	0	0.142857	0	0.0714286	0.0714286	0.0714286	0.533333	0	0	0.272727	0.30303	0	0.7	0.0769231	0.2	0.166667
0,2,4,-20	0	0	0	0	0	0	0	0	0	0	0	0	0	0	0.0714286	0	0	0	0	0	0
0,2,4,21	0	0	0	0	0	0	0	0	0	0	0	0	0	0	0.0714286	0	0	0	0	0	0
0,2,4,3	0.1	0	0	0	0	0	0	0	0	0.0285714	0	0	0	0.166667	0	0.0263158	0	0	0	0	0.1
0,2,4,-3	0	0	0	0	0	0	0	0	0	0	0	0	0	0	0.0714286	0.0263158	0	0	0	0	0
0,2,-4,-3	0	0	0	1	1	0	1	0	0	0	0	0	0	0	0	0	0	0	0	0	0
0,-2,4,3	0	0	0	0	0	0	0	0	0	0	0	0	0	0	0	0	1	0	0	0	0.25
0,-2,4,-3	0	0	0	0	0	0	0	0	0	0	0	0	0	1	0	0	0	0	0	0	0
0,-2,-4,3	0	0	0	0	0	0	0	0	0.0238095	0	0	0	0	0	0.0909091	0.030303	0	0	0	0	0
0,-2,-4,-3	0	0.05	0	0.25	0.1	0.5	0.0714286	0	0	0.0714286	0.0714286	0	0.111111	0	0	0	0	0	0	0	0
0,-2,-4,-34	0	0	0	0	0	0	0	0	0	0.0714286	0	0	0	0	0	0	0	0	0	0	0
0,2,4,4	0	0	0	0	0	0	0	0	0.03125	0	0	0.2	0.333333	0	0	0.0789474	0	0	0	0	0.2
0,2,4,-4	0	0	0	0	0	0	0	0	0.03125	0.0285714	0	0	0	0	0	0	0	0	0	0	0
0,2,-4,4	0	0	0	0	0	0	0	0	0	0	0	0	0	0	0	0	1	0	0	0	0
0,-2,-4,4	0	0	0	0	0	0	0	0	0	0	0.0714286	0	0	0	0.0909091	0	0	0	0	0	0
0,-2,-4,-4	0.25	0.05	0.166667	0	0	0	0	0	0	0	0	0	0	0	0	0.030303	0.0714286	0	0	0	0.0833333
0,2,4,5	0.7	0.666667	0.3	0.666667	0.333333	0.5	0.5	0	0.46875	0.314286	0.545455	0	0.333333	0.333333	0.0714286	0.105263	0	0	0	0.0714286	0
0,2,4,-5	0	0	0	0	0	0	0	0	0	0	0	0	0	0	0.0714286	0	0	0	0	0	0
0,2,-4,-5	0	0	0	0	0	0	0	0	0	0	0	0	0	0	0	0	0	0.5	0	0	0
0,-2,4,5	0	0	0	0	0	1	0	0	0	0	0	0	0	0	0	0	0	0	0	0	0
0,-2,-4,5	0	0.05	0	0.25	0	0	0	0	0	0	0.0714286	0	0	0	0	0	0	0	0	0	0
0,-2,-4,-5	0.5	0.25	0.5	0.25	0.3	0	0.428571	0	0.309524	0.285714	0.142857	0.0666667	0.444444	0.5	0.0909091	0.181818	0.214286	0.1	0	0.2	0.0416667
0,2,4,6	0.1	0.111111	0.2	0.333333	0	0	0	0	0.25	0.485714	0.272727	0	0	0.166667	0	0.105263	0	0	0	0.142857	0
0,-2,-4,-6	0	0.05	0.166667	0	0	0	0	0	0.0238095	0	0.142857	0	0	0.25	0.0909091	0.181818	0.142857	0	0.0769231	0	0.0833333
0,2,4,7	0.1	0	0.3	0	0.666667	0.5	0.25	0	0.125	0	0	0	0.222222	0	0.142857	0.131579	0.2	0	0.25	0.0714286	0
0,2,-4,-7	0	0	0	0	0	0	0	0	0	0	0	1	0	0	0	0.5	0	0	0	0	0
0,-2,4,7	0	0	0	0	0	0	0	0	1	0	0	0	0	0	0	0	0	0	0	0	0
0,-2,-4,7	0	0	0	0	0	0	0.0714286	0	0	0	0	0	0	0	0	0	0.0714286	0	0	0	0.0416667
0,-2,-4,-7	0.25	0.25	0.166667	0	0.4	0.5	0.0714286	0.75	0.0952381	0.214286	0.0714286	0.266667	0.222222	0	0	0.0909091	0.285714	0	0.307692	0.3	0.375
0,2,4,8	0	0	0	0	0	0	0	0	0	0	0	0	0	0	0	0	0.2	0	0.25	0	0
0,2,4,-8	0	0	0	0	0	0	0	0	0	0	0	0	0	0	0	0	0	0	0	0	0.1
0,2,-4,8	0	0	0	0	0	0	0	0	0	0	0	0	0	0	0	0	0	0.5	0	0	0
0,2,-4,-8	0	0	0	0	0	0	0	0	0	0	0	0	0	0	0	0.5	0	0	0	0	0
0,-2,-4,8	0	0	0	0	0	0	0	0	0	0	0	0	0	0.25	0	0	0	0	0	0	0
0,-2,-4,-8	0	0	0	0	0	0	0.0714286	0	0	0.142857	0	0	0	0	0	0	0	0.1	0.0769231	0	0
0,2,4,9	0	0	0.2	0	0	0	0.125	0	0	0	0	0	0	0	0	0.0526316	0	0	0	0.214286	0
0,2,-4,9	0	0	0	0	0	0	0	0	0	0	0	0	0	1	0	0	0	0	0	0	0
0,-2,-4,-9	0	0	0	0	0	0	0	0.25	0.404762	0	0.214286	0	0.111111	0	0	0	0	0	0	0.1	0
0,2,5,0	0	0	0	0	0	0.2	0.2	0	0	0	0	0	0	0	0.444444	0	0.2	0	0	0	0
0,2,-5,0	0	0	0	0	0	1	0	0	0	0	0	0	0	0	0	0	0.666667	0	0	0	0
0,-2,5,0	0	0	0	0	0	0	0	0	0	1	0	0	0	0	0.5	0	0	0	0	0	0
0,-2,-5,0	0	0	0	0	0	0.0666667	0	0.176471	0	0.333333	0	0	0	0	0	0.266667	0.307692	0	0.277778	0.0625	0.178571
0,2,5,1	0	0	0	0	0	0	0	0	0	0	0	0	0	0	0	0	0	0.166667	0	0	0
0,2,5,-1	0	0	0	0	0	0	0	0	0	0	0	0	0	0	0	0.0714286	0	0	0	0	0.25
0,-2,5,1	0	0	0	0	0	0	0	0	0	0	0	0	0	0	0.5	0	0	0	1	0	0
0,-2,-5,1	0	0.0909091	0	0	0	0	0.125	0	0	0.166667	0	0	0	0.333333	0	0	0	0	0	0	0
0,-2,-5,-1	0	0	0	0	0	0	0	0	0	0	0	0	0	0	0	0	0	0	0	0	0.0357143
0,2,5,10	0	0	0	0	0	0	0	0	0.2	0	0	0	0	0	0.111111	0	0	0	0	0	0
0,2,-5,-10	0	0	0	0	0	0	0	0	0	0	0	0	0	0	0	1	0	0	0	0	0
0,-2,5,10	0	0	1	0	0	0	0	0	0	0	0	0	0	0	0	0	0	0	0	0	0
0,-2,-5,-10	0.222222	0.272727	0	0	0	0	0	0	0	0	0	0	0	0.333333	0.142857	0	0.153846	0	0	0.1875	0
0,-2,-5,-11	0	0	0	0	0	0	0.125	0	0	0	0	0	0	0	0	0	0	0	0	0	0
0,2,5,12	0	1	0	0	0	0	0	1	0	0	0	0	0	0	0.111111	0	0	0	0	0	0
0,-2,-5,-12	0	0	0	0	0	0	0	0	0	0	0	0	0	0	0	0	0	0	0	0.0625	0
0,2,5,14	0	0	0	0	0.25	0	0	0	0	0	0	0	0	0	0	0	0	0	0	0	0
0,-2,-5,14	0	0	0	0	0	0	0	0	0	0	0	0	0	0	0	0	0	0.125	0	0	0
0,-2,-5,-14	0	0	0	0	0	0	0	0	0	0	0	0	0	0	0	0	0	0.125	0	0	0
0,2,5,-17	0	0	0	0	0	0	0	0	0	0	0	0	0	0	0	0.0714286	0	0	0	0	0
0,-2,-5,-17	0	0	0	0	0	0	0	0.0588235	0	0	0	0	0	0	0	0	0	0	0	0	0
0,2,5,2	0.5	0	0.6	0	0.5	0.2	0	0	0.2	0.25	0	0.333333	0.166667	0.5	0.111111	0.0714286	0.4	0.166667	0	0.222222	0.25
0,2,5,-2	0	0	0	0	0	0	0	0	0	0	0	0	0	0	0.111111	0	0.2	0.333333	0	0.222222	0
0,2,-5,-2	0	0	0	0	0	0	0	0	0	0	0	0	0	0	0	0	0	0	0	0	1
0,-2,5,2	1	0	0	0	0	0	0	0	0	0	0	1	0	0	0	0	0	0	0	0	0
0,-2,5,-2	0	0.5	0	0	0	0	0	0	0	0	0	0	0	1	0	0	0	0	0	0	0
0,-2,-5,2	0	0.181818	0	0	0.1	0	0	0.176471	0	0	0	0	0	0	0	0	0	0.375	0.0555556	0	0.0714286
0,-2,-5,-2	0	0	0.25	0	0	0.0666667	0.125	0.0588235	0.166667	0	0	0.5	0.2	0	0	0.0666667	0.153846	0	0.0555556	0	0.107143
0,2,-5,-22	0	0	0	0	0	0	0	0	0.5	0	0	0	0	0	0	0	0	0	0	0	0
0,2,5,3	0.5	0	0.2	0	0.25	0	0.4	0	0	0	0	0	0	0	0.111111	0.142857	0	0	0.5	0	0
0,2,-5,-3	0	0	0	0	0	0	0	0	0.5	1	0	0	0	0	0	0	0	0	0	0	0
0,-2,5,3	0	0	0	0	0	0	0	0	1	0	1	0	0	0	0	1	0	1	0	0	0
0,-2,-5,3	0	0	0	0	0	0	0	0	0	0.166667	0	0	0	0	0	0	0	0	0	0	0
0,-2,-5,-3	0.222222	0.0909091	0	0	0	0.133333	0	0	0	0	0	0	0	0	0	0	0	0	0	0	0
0,2,5,4	0	0	0	0	0	0	0	0	0	0	0	0	0.166667	0	0	0	0	0.166667	0.5	0.111111	0
0,2,-5,-4	0	0	0	0	0	0	0	0	0	0	0	0	0	0	0	0	0.333333	0	0	0	0
0,-2,5,4	0	0	0	0	0	0	0	0	0	0	0	0	0	0	0	0	1	0	0	0	0
0,-2,-5,-4	0.111111	0.0909091	0	0.666667	0.2	0.266667	0.125	0.0588235	0	0	0.2	0	0.2	0	0	0	0.0769231	0	0	0.0625	0.0357143
0,2,5,5	0	0	0	0	0	0	0	0	0	0	1	0.333333	0	0	0	0	0	0	0	0.111111	0
0,2,-5,5	0	0	0	0	0	0	0	0	0	0	0	0	0	0	1	0	0	0	0	0	0
0,-2,5,5	0	0	0	0	0	0	0	1	0	0	0	0	0	0	0	0	0	0	0	0	0
0,-2,5,-5	0	0	0	0	0	1	0	0	0	0	0	0	0	0	0	0	0	0	0	0	0
0,-2,-5,5	0.111111	0	0	0	0	0	0	0.0588235	0	0	0	0	0	0	0	0	0	0	0	0	0.0714286
0,-2,-5,-5	0	0	0	0	0	0	0	0.117647	0	0	0.2	0	0	0	0	0.266667	0	0	0	0	0.107143
0,2,5,6	0	0	0	0	0	0	0	0	0.2	0.25	0	0	0	0.5	0	0.0714286	0	0	0	0	0
0,-2,5,6	0	0.5	0	0	0	0	0	0	0	0	0	0	0	0	0	0	0	0	0	0	0
0,-2,-5,-6	0.111111	0.0909091	0	0	0	0	0.125	0	0	0	0	0	0	0.333333	0	0.0666667	0	0	0.0555556	0	0
0,2,5,7	0	0	0	0	0	0.2	0.4	0	0	0.5	0	0	0.5	0	0	0.5	0.2	0.166667	0	0.222222	0
0,-2,-5,7	0	0	0	0	0	0	0	0	0	0	0	0.125	0	0	0	0	0	0	0	0.0625	0
0,-2,-5,-7	0.111111	0	0	0	0.4	0.0666667	0	0.294118	0.833333	0.166667	0	0.375	0.6	0	0.142857	0.2	0.0769231	0	0.222222	0.1875	0.0714286
0,2,5,8	0	0	0	0	0	0.2	0	0	0	0	0	0.333333	0	0	0	0	0	0	0	0	0
0,-2,-5,-8	0	0	0	0	0	0.0666667	0	0	0	0.166667	0.2	0	0	0	0	0.0666667	0	0	0.166667	0.0625	0.142857
0,2,5,9	0	0	0.2	0	0	0.2	0	0	0.4	0	0	0	0.166667	0	0	0.0714286	0	0	0	0.111111	0.5
0,-2,-5,9	0	0	0	0	0	0	0	0	0	0	0	0	0	0	0	0	0	0	0	0.0625	0
0,-2,-5,-9	0.111111	0.181818	0.75	0.333333	0.3	0.333333	0.375	0	0	0	0.4	0	0	0	0.714286	0.0666667	0.230769	0.375	0.166667	0.25	0.178571
0,-2,-6,0	0	0	0	0	0	0	0	0	0	0	0	0	0	0	0	0.333333	0	0	0	0	0.25
0,-2,-6,1	0	0	0	0	0	0	0	0	0	0	0	0	0	0.333333	0	0	0	0	0.5	0	0
0,-2,-6,-10	0	0	0	0	0	0	0	0	0	0.333333	0	0	0	0	0	0	0	0	0	0.5	0
0,-2,-6,-11	0.333333	0	0	0	0	0	0	0	0	0	0	0	0	0	0	0	0	0	0	0	0
0,-2,-6,-12	0	0	0	0	0	0	0	0	0	0.333333	0	0	0	0	0	0	0	0	0	0	0
0,2,6,2	0	0	0	0	0	0	0	0	0	0	0	0	0	0	0	0	1	0.5	0.333333	0	0
0,-2,-6,2	0	0	0	0	0	0.25	0	0	0	0.333333	0	0	0	0	0	0	0	0	0	0	0
0,-2,6,3	0	0	0	0	0	0	0	0	0	0	1	0	0	0	0	0	0	0	0	0	0
0,-2,-6,3	0	0	0	0	0	0.25	0	0	0	0	0	0	0	0	0	0	0	0	0	0	0.25
0,-2,-6,-3	0	0	0	0	0	0	0.5	0	0	0	0	0	0	0	0	0.333333	0	1	0	0	0
0,2,6,4	0	0	0	0	0	0	0	0	0	0	0	0	0	0	1	0	0	0	0	0	0
0,2,-6,-4	0	0	0	0	0	0	0	0	1	0	0	0	0	0	0	0	0	0	0	0	0
0,-2,6,4	0	0	0	0	0	1	0	0	0	0	0	0	0	0	0	0	0	0	0	0	0
0,-2,-6,-4	0	0	0	0	0	0	0	0	0	0	0	0	0	0	1	0	0	0	0.5	0	0
0,2,-6,-5	0	0	0	0	1	0	0	0	0	0	0	0	0	0	0	0	0	0	0	0	0
0,-2,-6,5	0.333333	0	0	0	0	0	0	0	0	0	0	0	0	0	0	0	0	0	0	0	0
0,-2,-6,-5	0.333333	1	0	0	1	0.5	0	0	0	0	0	0	0	0	0	0	0	0	0	0	0
0,-2,-6,-6	0	0	0	0	0	0	0	0	0	0	0	0	1	0	0	0	0	0	0	0	0.5
0,2,6,7	0	0	0	0	0	0	0	0	0	0	1	0	0	0	0	0	0	0	0.333333	1	0
0,-2,-6,-7	0	0	1	0	0	0	0	1	0	0	1	0	0	0.333333	0	0.333333	0	0	0	0.5	0
0,2,6,8	0	0	1	0	0	0	0	0	0	0	0	0	0	0	0	0	0	0	0	0	0
0,-2,-6,-8	0	0	0	0	0	0	0.5	0	0	0	0	0	0	0	0	0	0	0	0	0	0
0,2,6,9	0	0	0	0	1	0	0	0	0	0	0	0	0	0	0	0	0	0.5	0.333333	0	0
0,2,-6,-9	0	0	0	0	0	0	0	0	0	1	0	0	0	0	0	0	0	0	0	0	0
0,-2,6,9	0	0	0	0	0	0	0	0	0	0	0	0	0	0	1	0	0	0	0	0	0
0,-2,-6,-9	0	0	0	1	0	0	0	0	0	0	0	0	0	0.333333	0	0	0	0	0	0	0
0,2,7,0	0	0	0	0	0	0	0	0	0	0	0	0	0	0	0.375	0	1	0	0	0	0
0,2,-7,0	0	0	0	0	0	0	0	1	0	0	0	0	0	0	0	0	0	0	0	0	0
0,-2,-7,0	0.142857	0	0.2	0	0	0	0	0	0.0526316	0	0	0	0	0	0	0	0	0	0	0	0
0,2,-7,1	0	0	0	0	0	0	0	0	0	1	0	0	0	0	0	0	0	0	0	0	0
0,2,7,10	0	0	0	0	0	0	0	0	0	0	0	0	0	0	0	0.333333	0	0	0	0.25	0
0,-2,7,10	0	1	0	0	0	0	0	0	0	0	0	0	0	0	0	0	0	0	0	0	0
0,-2,-7,-10	0	0	0	0	0.5	0	0	0	0	0	0	0	0	0	0	0	0	0	0.5	0.5	0
0,2,7,11	0	0	0	0	0	0	0	0	1	0	0	0	0	0	0	0	0	0	0	0	0
0,-2,-7,11	0	0	0	0	0	0	0	0	0	0	0.166667	0	0	0	0	0	0	0	0	0	0
0,-2,-7,-11	0.571429	1	0.4	1	0.5	0.5	0.571429	0	0	0	0	0	0.4	0	0	0	0	0	0	0	0
0,2,7,12	0	0.5	0	0	0	0	0	0	0	0	0	0	0	0	0	0	0	0	0	0.25	0
0,-2,-7,-12	0	0	0	0	0	0	0	1	0	0	0	0	0	0.5	0	0	0	0	0	0	0
0,-2,-7,13	0	0	0	0	0	0	0	0	0	0	0	0	0	0.25	0	0	0	0	0	0	0
0,-2,-7,-14	0	0	0	0	0	0	0	0	0	0	0	0	0	0	0	0	0	0.5	0	0	0
0,2,7,17	0	0	0	0	0	0	0	0	0	0	0	0	0	0	0	0.166667	0	0	0	0	0
0,2,7,2	0	0.5	1	0	0	0	0	0	0	0	0	0	0	1	0	0	0	0	0	0	0
0,2,-7,-2	0	0	0	0	0	0	0	0	1	0	0	0	0	0	0.5	0	0	0	0	0	0
0,-2,-7,2	0	0	0	0	0	0	0	0	0.684211	0	0	0	0	0	0	0	0	0	0.5	0	0
0,-2,-7,-2	0	0	0	0	0	0	0.142857	0	0	0	0	0	0	0.25	0	0	0	0	0	0	0
0,2,7,3	0	0	0	0	0	0	0	0	0	0	0	0	0	0	0.125	0	0	0	0	0	0
0,-2,7,3	0	0	0	1	0	0	0	0	0	0	0	0	0	0	0	0	0	0	0	0	1
0,-2,-7,3	0	0	0	0	0	0	0	0	0	1	0	0	0	0	0	0	0	0	0	0	0
0,-2,-7,-3	0	0	0	0	0	0	0.142857	0	0	0	0	0	0	0	0	0	0	0	0	0	0
0,2,7,4	0	0	0	0	0	0	0	0	0	1	0	0	0	0	0.25	0	0	0	0	0	0.333333
0,-2,7,4	0	0	0	0	0	0	0	0	0	0	1	0	0	0	0	0	0	0	0	0	0
0,-2,7,-4	0	0	0	0	0	0	0	0	1	0	0	0	0	0	0	0	0	0	0	0	0
0,-2,-7,4	0	0	0	0	0	0	0	0	0.157895	0	0	0	0	0	0	0	0	0	0	0	0
0,-2,-7,-4	0	0	0	0	0	0	0.142857	0	0	0	0	0	0	0	1	0	1	0	0	0	1
0,2,7,5	0	0	0	0	0	0	1	0	0	0	0	1	0	0	0	0.166667	0	0.5	0	0.5	0.666667
0,-2,7,5	0	0	0	0	0	0	0	0	0	0	0	1	0	0	0	0	0	0	0	0	0
0,-2,-7,5	0	0	0	0	0	0	0	0	0	0	0.333333	0	0	0	0	0	0	0	0	0	0
0,-2,-7,-5	0	0	0	0	0	0	0	0	0.0526316	0	0.333333	1	0.2	0	0	0.666667	0	0.5	0	0	0
0,2,7,6	0	0	0	0	0	0	0	0	0	0	0	0	0	0	0	0	0	0.25	0	0	0
0,-2,-7,-6	0.142857	0	0	0	0	0	0	0	0	0	0	0	0.4	0	0	0	0	0	0	0	0
0,2,7,7	0	0	0	0	0	0	0	0	0	0	0	0	0	0	0	0.166667	0	0	0	0	0
0,-2,7,7	0	0	0	0	0	0	0	0	0	0	0	0	1	0	0	0	0	0	0	0	0
0,-2,-7,-7	0	0	0	0	0	0.5	0	0	0.0526316	0	0	0	0	0	0	0	0	0	0	0	0
0,2,7,8	0	0	0	0	0	0	0	0	0	0	0	0	0	0	0.125	0	0	0	0	0	0
0,2,-7,-8	0	0	0	0	0	0	0	0	0	0	0	0	0	0	0.5	0	0	0	0	0	0
0,2,7,9	0	0	0	0	0	0	0	0	0	0	0	0	0	0	0.125	0.166667	0	0.25	1	0	0
0,-2,-7,-9	0.142857	0	0.4	0	0	0	0	0	0	0	0.166667	0	0	0	0	0.333333	0	0	0	0.5	0
0,2,8,10	0	0	0	0	0	0	0	1	0	0	0	0	0	0	0	0	0	0	0	0	0
0,-2,-8,-2	0	0	0	0	0	0	0	0	0	0	0	0	0	0	0	1	1	0	0	0	0
0,2,-8,-5	0	0	0	0	0	0	0	0	0	0	0	1	0	0	0	0	0	1	0	0	0
0,-2,8,5	0	0.5	0	0	0	0	0	0	0	0	0	0	0	0	0	0	0	0	0	0	1
0,-2,8,6	0	0.5	0	0	0	0	0	0	0	0	0	0	0	0	0	0	0	0	0	0	0
0,-2,8,7	0	0	0	0	0	1	0	0	0	0	0	0	0	0	0	0	0	0	0	0	0
0,2,8,8	0	0	0	0	0	0	0	0	0	0	1	0	0	0	0	0	0	0	0	0	0
0,-2,-8,-8	0	0	0	0	0	0	0	0	0	0	0	1	0	0	0	0	0	0	0	0	0
0,2,-9,-10	1	0	0	0	0	0	0	0	0	0	0	0	0	0	0	0	0	0	0	0	0
0,-2,9,10	0	0	0	0	1	0	1	0	0	0	0	0	0	1	0	0	0	0	0	0	0
0,-2,-9,-10	0	0	0	0	0	0	0	0.2	0	0	0	0	0	0	0	0	0	0	0	0	0
0,-2,9,11	0	0	0	0	0	0	0	0	0	0	0	0	0	0	0	0	1	0	0	0	0
0,-2,-9,-11	0	0	0	0	0	0	0	0.6	0	0	0	0	0	0	0	0	0	0	0	0	0
0,2,9,12	0	0	0	0	0	0	0	0	0	0	0	0	0	0	0	0	0	1	0	0	0
0,-2,9,12	0	0	0	0	0	0	0	0	0	0	0	0	1	0	0	0	0	0	0	0	0
0,-2,-9,-12	0	0	0	0	0.5	0	0	0	0	0	0	0	0	0	0	1	0	0	0	0	0
0,-2,-9,-2	0	0	0	0	0	0	0	0.2	0	0	0	0	0	0	0	0	0	0	0	0	0
0,2,9,4	0	0	0	0	0	0	0	0	0	0	0	0	0	0	1	0	0	0	0	0	0
0,-2,-9,-5	0	0	0	0	0	0	0	0	0	0	0	0	0	0	0	0	0	0	0	1	0
0,-2,9,6	0	0	0	0	0	0	0	0	0	0	0	0	0	0	1	0	0	0	0	0	0
0,2,9,7	0	0	0	0	0	0	0	0	0	0	0	0	1	0	0	0	0	0	0	0	0
0,2,-9,7	0	0	0	0	0	0	0	0	0	0	0	0	0	0	0	1	0	0	0	0	0
0,-2,9,7	0	1	0	0	0	0	0	0	0	0	0	0	0	0	0	0	0	0	0	0	0
0,-2,-9,-7	0	0	0	0	0	0	0	0	0	0	0	0	1	0	0	0	0	0	0	0	0
0,-2,9,8	0	0	0	0	0	0	0	0	0	0	0	0	0	0	0	0	0	0	0	0	1
0,-2,-9,-8	0	1	0	0	0	0	0	0	0	0	0	0	0	0	0	0	0	0	0	0	0
0,2,9,9	0	0	0	0	0	0	0	0	1	0	0	0	0	0	0	0	0	0	0	0	0
0,-2,-9,-9	0	0	0	0	0.5	0	0	0	0	0	0	0	0	0	0	0	0	0	0	0	0
0,-20,-15,-13	0	0	0	0	0	0	0	0	1	0	0	0	0	0	0	0	0	0	0	0	0
0,-20,-15,-8	0	0	0	0	0	0	0	0	0	0	0	0	0	0	0	0	0	0	1	0	0
0,20,23,28	0	0	0	0	0	0	0	0	0	1	0	0	0	0	0	0	0	0	0	0	0
0,20,8,3	0	0	0	0	0	0	0	0	0	0	0	0	0	1	0	0	0	0	0	0	0
0,-21,-17,-14	0	0	0	0	0	0	0	0	0	0	0	0	0	0	0	0	0	0	0	0	0.5
0,-21,-17,-19	0	0	0	0	0	0	0	0	0	0	0	0	0	0	0	0	0	0	0	0	0.5
0,21,9,5	0	0	0	0	0	0	0	0	0	0	1	0	0	0	0	0	0	0	0	0	0
0,22,19,15	0	0	1	0	0	0	0	0	0	0	0	0	0	0	0	0	0	0	0	0	0
0,-22,-19,-16	0	0	0	0	0	0	0	0	0	1	0	0	0	0	0	0	0	0	0	0	0
0,-22,-19,-17	0	0	0	0	0	0	0	0	0	0	0	0	0	0	0	1	0	0	0	0	0
0,23,16,21	0	0	0	0	0	0	0	0	0	0	0	0	0	0	0	0	0	1	0	0	0
0,23,22,19	0	0	0	0	0	0	0	0	0	0	1	0	0	0	0	0	0	0	0	0	0
0,23,24,28	0	0	0	0	0	0	0	0	0	0	0	0	0	0	0	1	0	0	0	0	0
0,-24,-21,-22	0	0	0	0	0	0	0	0	0	0	0	0	0	0	0	0	0	0	0	0	1
0,-24,-21,-24	0	0	0	0	0	0	0	0	0	0	0	0	0	0	1	0	0	0	0	1	0
0,-24,-22,-20	0	0	0	0	0	0	0	0	0	0	0	0	0	0	1	0	0	0	0	0	0
0,-24,-24,-15	0	0	0	0	0	0	0	0	0	0	0	0	0	0	0	0	0	1	0	0	0
0,-25,-23,-18	0	0	0	0	0	0	0	0	0	0	0	0	0	0	0	0	0	0	1	0	0
0,-25,-24,-23	0	0	0	0	0	0	0	0	0	0	1	0	0	0	0	0	0	0	0	0	0
0,26,27,26	0	0	0	0	0	0	0	0	0	0	0	0	0	0	1	0	0	0	0	0	0
0,26,28,26	0	0	0	0	0	0	0	0	0	0	0	0	0	0	0	0	0	0	0	0	1
0,-27,-24,-22	0	0	0	0	0	0	0	0	0	0	0	0	0	0	0	0	0	0	0	1	0
0,29,28,27	0	0	0	0	0	0	0	0	0	1	0	0	0	0	0	0	0	0	0	0	0
0,3,0,0	0	0	0	0	0.2	0	0	0	0.142857	0	0.0909091	0.153846	0	0	0.166667	0.272727	0.6	0	0	0	0
0,-3,0,0	0	0	0	0	0	0	0	0.692308	0	0	0	0.0625	0	0	0	0.285714	0	0	0	0.25	0.153846
0,3,0,1	0.764706	0.333333	0.384615	0	0.6	0.533333	1	0	0.285714	0.666667	0.181818	0	0	0.75	0	0	0	0	0	0	0.1
0,3,0,-1	0	0	0.0769231	0	0	0.133333	0	0	0	0	0	0	0	0	0	0	0	0	0	0	0.1
0,-3,0,1	0	0	0	0	0	0.25	0	0	0	0	0	0	0	0	0	0	0	0	0	0	0
0,-3,0,-1	0.5	0	0	0	0	0	0	0	0	0	0.0769231	0	0	0	0	0.142857	0	1	0	0	0
0,3,0,-10	0	0	0	0.333333	0	0	0	0	0	0	0	0	0	0	0	0	0	0	0	0	0
0,-3,0,10	0	0	0	0	0	0	0	0	0	0	0.0769231	0	0	0	0	0.142857	0	0	0	0	0
0,-3,0,-10	0	0	0	0	0	0	0	0	0	0	0	0	0	0	0	0	0	0	0	0	0.0769231
0,3,0,-11	0	0	0	0	0	0	0	0	0	0	0	0	0	0	0	0	0	0	0	0.333333	0
0,3,0,-12	0	0	0	0	0	0	0	0	0	0	0	0	0	0	0	0.0909091	0	0	0	0	0
0,-3,0,12	0	0	0	0	0	0	0	0.0769231	0	0	0	0	0	0	0	0	0	0	0	0	0
0,3,0,2	0	0.166667	0	0	0	0.0666667	0	0	0	0	0.0909091	0	0	0	0	0	0	0	0.0909091	0	0
0,3,0,-2	0.0588235	0	0.0769231	0.333333	0	0	0	0	0.571429	0	0	0.0769231	0	0	0.166667	0.454545	0	0	0.0909091	0.333333	0.3
0,-3,0,2	0	0	0.285714	0	0	0.25	0	0	1	0.5	0.0769231	0.25	0.5	0	0.4	0.285714	0.2	0	0.25	0.25	0.230769
0,-3,0,-2	0	0	0	0	0	0	1	0	0	0	0	0	0.25	0	0.4	0	0.2	0	0	0	0.0769231
0,3,0,3	0.0588235	0	0.0769231	0	0	0.133333	0	0.5	0	0.166667	0.272727	0.307692	0.5	0	0	0	0	0.142857	0	0	0.5
0,3,0,-3	0	0	0	0	0	0	0	0	0	0	0	0.0769231	0	0	0	0	0	0	0	0.333333	0
0,-3,0,3	0	0	0.142857	0	0.333333	0	0	0	0	0	0	0.125	0	0	0	0.142857	0	0	0	0.25	0
0,-3,0,-3	0.5	0	0	0	0	0	0	0.0769231	0	0.5	0.461538	0.375	0	0	0.2	0	0.2	0	0	0	0.307692
0,3,0,4	0.0588235	0	0	0	0	0.0666667	0	0	0	0	0.181818	0	0	0	0	0.0909091	0	0	0	0	0
0,3,0,-4	0	0.166667	0.384615	0.333333	0.2	0	0	0	0	0	0.0909091	0.0769231	0.5	0.25	0.666667	0	0.2	0.571429	0	0	0
0,-3,0,4	0	0	0.285714	0	0.333333	0.5	0	0.0769231	0	0	0.230769	0	0	0	0	0	0.2	0	0.5	0	0.0769231
0,-3,0,-4	0	0	0	0	0	0	0	0	0	0	0	0	0	0	0	0	0	0	0	0	0.0769231
0,3,0,5	0	0.166667	0	0	0	0	0	0.5	0	0.166667	0	0.153846	0	0	0	0	0.2	0	0.818182	0	0
0,3,0,-5	0	0	0	0	0	0	0	0	0	0	0.0909091	0	0	0	0	0	0	0.285714	0	0	0
0,-3,0,5	0	0	0	0	0	0	0	0	0	0	0	0.0625	0	0	0	0	0	0	0.25	0.25	0
0,-3,0,-5	0	0	0.142857	0	0	0	0	0	0	0	0.0769231	0	0	0	0	0	0.2	0	0	0	0
0,3,0,6	0	0	0	0	0	0	0	0	0	0	0	0.0769231	0	0	0	0	0	0	0	0	0
0,3,0,7	0	0	0	0	0	0.0666667	0	0	0	0	0	0.0769231	0	0	0	0	0	0	0	0	0
0,3,0,-7	0.0588235	0.166667	0	0	0	0	0	0	0	0	0	0	0	0	0	0	0	0	0	0	0
0,-3,0,7	0	0	0	0	0.333333	0	0	0.0769231	0	0	0	0.0625	0	0	0	0	0	0	0	0	0
0,-3,0,-7	0	0	0	0	0	0	0	0	0	0	0	0	0.25	0	0	0	0	0	0	0	0
0,-3,0,-8	0	0	0.142857	0	0	0	0	0	0	0	0	0	0	0	0	0	0	0	0	0	0
0,3,0,-9	0	0	0	0	0	0	0	0	0	0	0	0	0	0	0	0.0909091	0	0	0	0	0
0,-3,0,9	0	0	0	0	0	0	0	0	0	0	0	0.0625	0	0	0	0	0	0	0	0	0
0,3,1,0	0	0.428571	0.333333	0	0.142857	0.333333	0.230769	0	0	0	0.5	0	0.5	1	0	0	0	0	0	0	0.25
0,-3,1,0	1	0	0	0	0	0	0	0	0	0	0	0	0	0.666667	0	0	1	0	1	0	1
0,-3,-1,0	0.3	0.666667	0	0.5	0	0	0.2	0	0.6	0	0	0	0	0.75	0	0	0	0	0	0	0
0,3,1,1	0	0	0	0.4	0	0	0	0	0	0.5	0	0	0	0	0	0	0.333333	0	1	1	0.25
0,3,1,-1	0	0	0	0	0	0	0	0	0	0	0.5	0	0.166667	0	0	0.333333	0	0	0	0	0.25
0,3,-1,-1	0	0	0	0	0	0	0	0	0	0	0	0	0	0	0	0	0	0	0	0	0.333333
0,-3,1,1	0	0	0	0	0	0	0	0	0	0	0	0	0	0	0	1	0	0	0	0	0
0,-3,-1,1	0	0	0	0	0	0	0	0	0	0	0	0	0	0	0	0	0	0	0	0	0.166667
0,3,1,12	0	0.142857	0	0	0	0	0	0	0	0	0	0	0	0	0	0	0	0	0	0	0
0,3,1,-16	0	0	0	0	0	0	0	0	0	0	0	0	0	0	0	0	0	1	0	0	0
0,3,1,2	0.166667	0	0	0	0	0.333333	0.0769231	0	0	0.166667	0	0	0	0	0	0	0	0	0	0	0
0,3,1,-2	0.0833333	0.142857	0	0.2	0	0	0	0	0	0	0	0	0	0	0.666667	0	0	0	0	0	0
0,3,-1,2	0	0	0	0	0	0	0	0	0	1	0	0	0	0	0	0	0	0	0	0	0
0,3,-1,-2	0	0	0	0.5	0	1	1	0	0	0	0	0	0	0	0	0	0	0	0	0	0
0,-3,1,2	0	0	0	0	0	1	0	0	0	0	0	0	0	0	0	0	0	0	0	0	0
0,-3,-1,2	0	0	1	0	1	0.5	0.6	0	0	0	0	0	0	0	0.6	0	1	0	0	0	0.333333
0,-3,-1,-2	0	0	0	0	0	0	0	0	0	0	0	0	0	0.25	0	0	0	0	0	0	0
0,3,-1,25	0	0	0	0	0	0	0	0	0	0	0	0	0	0	0	0	0	0	0	0	0.333333
0,3,1,3	0	0	0	0.2	0	0	0.0769231	0	0	0.333333	0	0	0	0	0	0.666667	0.333333	0	0	0	0
0,3,1,-3	0.25	0.142857	0	0	0	0	0	0	0	0	0	0	0	0	0	0	0	0	0	0	0
0,3,-1,3	0	0	0	0	0	0	0	0	0	0	0	1	0	0	0	0	0	1	0	0	0.333333
0,-3,1,-3	0	0	0	0	0	0	0	0	0	0	1	0	0	0	0	0	0	0	0	0	0
0,-3,-1,-3	0.3	0	0	0	0	0.25	0	0	0	0	0	1	0	0	0	0	0	0	0	0	0
0,3,1,4	0	0	0.333333	0	0	0	0	0	0	0	0	0	0.166667	0	0	0	0	0	0	0	0
0,3,1,-4	0.416667	0	0	0.2	0.285714	0.333333	0.307692	0	0	0	0	0	0	0	0	0	0	0	0	0	0
0,3,-1,-4	0	0	0	0	1	0	0	0	0	0	0	0	0	0	0	0	0	0	0	0	0
0,-3,-1,4	0	0	0	0	0	0	0	0	0	0	0	0	0	0	0.4	1	0	0	0	0	0.166667
0,-3,-1,-4	0.3	0	0	0	0	0.25	0	0	0	0	0	0	0	0	0	0	0	0	1	0	0
0,3,1,5	0.0833333	0.142857	0	0	0	0	0.0769231	0	0	0	0	0	0	0	0	0	0	0	0	0	0.25
0,3,-1,-5	0	0	0	0	0	0	0	0	0	0	0	0	1	0	0	0	0	0	0	0	0
0,-3,1,-5	0	0	0	0	0	0	0	0	0	0	0	0	0	0.333333	0	0	0	0	0	0	0
0,-3,-1,-5	0.1	0	0	0.5	0	0	0	1	0.4	0	0	0	0	0	0	0	0	0	0	1	0.333333
0,3,1,6	0	0	0.333333	0	0	0	0	0	0	0	0	0	0	0	0	0	0.333333	0	0	0	0
0,3,1,-6	0	0	0	0	0.285714	0	0	0	0	0	0	0	0.166667	0	0	0	0	0	0	0	0
0,-3,-1,-6	0	0	0	0	0	0	0.2	0	0	0	1	0	0	0	0	0	0	0	0	0	0
0,3,1,-7	0	0	0	0	0.285714	0	0.230769	0	0	0	0	0	0	0	0	0	0	0	0	0	0
0,3,-1,-7	0	0	0	0.5	0	0	0	0	0	0	0	0	0	0	0	0	0	0	0	0	0
0,-3,-1,7	0	0.333333	0	0	0	0	0	0	0	0	0	0	0	0	0	0	0	0	0	0	0
0,3,1,-8	0	0	0	0	0	0	0	0	0	0	0	0	0	0	0.333333	0	0	0	0	0	0
0,3,10,0	0.5	0	0	0	0	0	0	0	0	0	0	0	0	0	0	0	0	0	0	0	0
0,3,10,10	0	0	0	0	0	0.333333	0	0.333333	0	0	0	0.5	0	0	0	0	0	0	0	0	0
0,-3,-10,-10	0	0	0	0	0	0	0	0	1	0	0	0	0	0	0	0	0	0	0	0	0
0,-3,10,11	0	1	0	0	0	0	0	0	0	0	0	0	0	0	0	0	0	0	0	0	0
0,-3,-10,-11	0	0	0	0	0	0	0	0	0	0	0	0	0	0	0	0	0	0	0	0	1
0,3,10,12	0	0	0	0	0	0	0	0.333333	0	0	0	0	0	0	0	0	0	0	0	0	0
0,3,10,15	0	0	0	0	0	0	0	0	0	0	0	0	0	0	1	0	0	0	0	0	0
0,-3,-10,2	0	0	0	0	0	0	0	0	0	0	0	0	0	0	0	0	0	0	0	1	0
0,3,10,3	0	0	0	0	1	0	0	0.333333	0	0	0	0.5	0	0	0	0	0	0	0	0	0
0,-3,-10,-3	1	0	0	0	0	0	0	0	0	0	0	0	0	0	0	0	0	0	0	0	0
0,3,10,7	0	0.5	0	0	0	0.333333	1	0	0	0	0	0	0	0	0	0	0	0	0	1	0
0,3,10,8	0	0.5	0	0	0	0.333333	0	0	0	0	0	0	0	0	0	0	0	0	1	0	0
0,-3,-10,-8	0	1	0	0	0	0	0	0	0	0	0	0	0	0	0	0	0	0	0	0	0
0,3,10,9	0.5	0	0	0	0	0	0	0	0	0	0	0	0	0	0	0	0	0	0	0	0
0,-3,11,14	0	0	0	1	0	0	0	0	0	0	0	0	0	0	0	0	0	0	0	0	0
0,-3,11,23	0	0	0	0	0	0	0	0	0	0	0	0	0	0	0	0	0	0	0	1	0
0,-3,11,7	0	0	0	0	0	1	0	0	0	1	0	0	0	0	0	0	0	0	0	0	0
0,3,11,8	0	1	0	0	0	0	0	0	0	0	0	0	0	0	0	0	0	0	0	0	0
0,3,12,10	0	0	0	0	1	0	0	0	0	0	0	0	0	0	0	0	0	0	0	0	0
0,-3,12,11	0	0	0	1	0	0	0	0	0	0	0	0	0	0	0	0	0	0	0	0	0
0,-3,-12,-15	0	0	0	0	0	0	0	0	0	0	0	0	0	0	0	1	0	1	0	0	0
0,3,12,3	0	0	0	0	0	0	0	1	0	0	0	0	0	0	0	0	0	0	0	0	0
0,3,12,6	0	0	0	0	0	0	0	0	0	0	0	1	0	0	0	0	0	0	0	0	0
0,-3,-12,-6	0	0	0	0	0	0	0	0	0	0	0	0	0	0	0	0	0	0	0	1	0
0,3,13,10	0	0	0	0	0	0	0	0	0	0	1	0	0	0	0	0	0	0	0	0	0
0,3,-13,-12	0	0	0	0	0	0	0	0	0	0	0	0	0	1	0	0	0	0	0	0	0
0,3,13,15	0	0	0	0	0	0	0	0	0	0	0	0	0	0	0	1	0	1	0	0	0
0,-3,13,23	0	0	0	0	0	0	0	0	0	0	0	0	0	0	0	0	1	0	0	0	0
0,-3,-13,-3	0	0	0	1	0	0	0	0	0	0	0	0	0	0	0	0	0	0	0	0	0
0,3,-13,-4	0	0	0	0	0	1	0	0	0	0	0	0	0	0	0	0	0	0	0	0	0
0,-3,14,10	0	0	0	0	1	0	0	0	0	0	0	0	0	0	0	0	0	0	0	0	0
0,-3,14,11	0	0	0	0	0	0	0	0	0	0	0	0	1	0	0	0	0	0	0	0	0
0,-3,-14,-15	0	0	0	0	0	0	0	0	0	0	0	0	0	0	0	0	0	0	0	1	0
0,-3,-15,-10	0	0	0	0	0	0	0	0	0	0	0	0	0	0	0	1	0	0	0	0	0
0,-3,-15,-15	0	0	0	0	0	0	0	1	0	0	0	0	0	0	0	0	0	0	0	0	0
0,3,15,22	0	0	0	0	0	0	0	1	0	0	0	0	0	0	0	0	0	0	0	0	0
0,3,-16,-12	0	0	0	0	0	0	0	0	0	0	0	0	0	0	0	1	0	0	0	0	0
0,-3,16,14	0	0	0	0	0	0	0	0	0	0	0	0	0	0	0	0	0	1	0	0	0
0,3,-19,-16	0	0	0	0	0	0	0	0	0	1	0	0	0	0	0	1	0	0	0	0	0
0,3,2,0	0.285714	0.5	0	0	0.666667	0.333333	0	0	0.0526316	0	0.571429	1	0.25	0	0	0.166667	0	0	0	0.333333	0.181818
0,3,-2,0	0	0	0	0	0	0	0	0	0	0.5	0	0	0	0	0.25	0	0	1	0	0	0
0,-3,2,0	1	0	0	0	0.5	0.5	0.333333	0.2	0	0.2	0	0.5	0	0	0.5	0.272727	0.555556	0	0.5	0.333333	0.714286
0,-3,-2,0	0.257143	0.5	0.125	0.111111	0	0.105263	0.0909091	0	0.3	0.6	0.6	0	0	0.25	0	1	1	0	0	0.333333	0
0,3,2,1	0	0.25	0.333333	0.8	0	0.5	0.5	0	0.842105	0	0.285714	0	0.25	1	0	0	0	0	0	0	0
0,3,2,-1	0.142857	0	0	0	0.333333	0	0	0	0	0	0	0	0.25	0	0	0.5	0	0	0.5	0.333333	0.0909091
0,3,-2,1	0	0	0	0	0	0	0	0	0	0	0	0	0	1	0.25	0	0	0	0	0	0
0,3,-2,-1	0	0	0	0	0	0.333333	0	0	0	0	0	0	0	0	0	0	0	0	0	0	0
0,-3,2,1	0	0	0	0	0	0	0.666667	0	0	0	0	0	0	0	0.25	0	0.111111	0	0.1	0	0
0,-3,2,-1	0	0.333333	0	0	0	0.5	0	0	0	0.2	0.5	0	0	0	0.25	0.181818	0.222222	1	0.05	0	0
0,-3,-2,1	0.0285714	0	0	0	0	0	0.181818	0	0	0	0	0	0.333333	0	0	0	0	0	0	0	0
0,-3,-2,-1	0.0571429	0.2	0	0.555556	0	0.421053	0.0909091	0	0.1	0.2	0.2	0	0.666667	0	0	0	0	0	0	0	0
0,-3,-2,10	0	0	0	0	0.166667	0	0	0	0	0	0	0	0	0	0	0	0	0	0	0	0
0,-3,-2,-10	0.0571429	0	0	0	0.333333	0.0526316	0	0	0.1	0.2	0	0	0	0	0	0	0	0	0	0	0
0,3,2,-11	0	0	0	0	0	0	0	0	0	0	0	0	0	0	0	0	0	0	0	0	0.0909091
0,-3,-2,-11	0	0	0	0	0	0.0526316	0	0	0	0	0	0	0	0	0	0	0	0	0	0	0
0,3,2,13	0	0	0	0	0	0	0	0	0	0	0	0	0	0	0	0.166667	0	0	0	0	0
0,-3,2,14	0	0	0	0	0	0	0	0	0	0	0	0	0	0	0	0.0909091	0	0	0	0	0
0,-3,-2,-17	0	0	0	0	0	0	0	0	0	0	0	0	0	0	0	0	0	0	0	0.333333	0
0,3,2,2	0	0	0	0	0	0	0	0	0	0	0	0	0	0	0	0	0	0	0.5	0	0.363636
0,3,2,-2	0	0.25	0.333333	0	0	0	0	0	0.0526316	0	0	0	0.25	0	0.5	0	0	0.25	0	0	0.0909091
0,3,-2,2	0	1	0	0	0	0	0	0	0	0	0	0	0	0	0.25	0	0.25	0	0	0	1
0,3,-2,-2	0.333333	0	0	0	0	0	0	0	0	0	0	0	0	0	0	0	0	0	0	0	0
0,-3,2,2	0	0	0	0	0	0	0	0	0	0	0	0	0	0	0	0.181818	0	0	0	0	0
0,-3,2,-2	0	0	0	0	0.5	0	0	0	0	0.2	0	0	0	0	0	0	0	0	0	0.333333	0
0,-3,-2,2	0.114286	0.2	0.625	0.111111	0.5	0.105263	0.363636	0	0	0	0	0	0	0	0	0	0	0	0	0	0
0,-3,-2,-2	0	0	0.25	0	0	0	0	0	0	0	0	0	0	0.25	0	0	0	0	0	0	0
0,3,2,3	0.571429	0	0	0	0	0	0.5	0	0.0526316	0	0	0	0	0	0.5	0	0	0.25	0	0	0
0,3,2,-3	0	0	0	0	0	0	0	0	0	0	0.142857	0	0	0	0	0	0	0	0	0	0
0,3,-2,3	0	0	0	0	0	0	0	0	0	0.5	0	0	1	0	0	1	0.5	0	0	0	0
0,3,-2,-3	0	0	0	0	0	0	1	0	0	0	0	0	0	0	0	0	0	0	0	0	0
0,-3,2,3	0	0.333333	0	0	0	0	0	0.6	0	0	0	0	0	0.5	0	0	0	0	0	0	0.142857
0,-3,2,-3	0	0.333333	1	0	0	0	0	0.2	0	0.4	0	0.5	0	0	0	0.0909091	0	0	0.35	0	0
0,-3,-2,-3	0.371429	0	0	0	0	0.105263	0	0	0.2	0	0	0	0	0	0	0	0	0	0	0	0.5
0,3,-2,-4	0.666667	0	1	0	0	0.666667	0	0	0	0	0	0	0	0	0.25	0	0.25	0	0	0	0
0,-3,2,4	0	0	0	0	0	0	0	0	0	0	0.5	0	0	0	0	0	0	0	0	0.333333	0
0,-3,-2,-4	0	0	0	0.111111	0	0	0.0909091	0	0	0	0.2	0	0	0	0	0	0	0	0	0	0
0,3,2,5	0	0	0.333333	0	0	0	0	0	0	0	0	0	0	0	0	0.166667	0	0.5	0	0	0.181818
0,3,2,-5	0	0	0	0	0	0	0	0	0	0	0	0	0	0	0	0	0	0	0	0.333333	0
0,3,-2,5	0	0	0	0	0	0	0	0	0	0	0	0	0	0	0	0	0	0	1	0	0
0,3,-2,-5	0	0	0	0	0	0	0	0	1	0	0.333333	0	0	0	0	0	0	0	0	0	0
0,-3,2,5	0	0	0	0	0	0	0	0	0	0	0	0	0	0.5	0	0	0	0	0	0	0.142857
0,-3,-2,5	0	0	0	0	0	0.0526316	0	0	0	0	0	0	0	0	0	0	0	0	0	0	0
0,-3,-2,-5	0.0857143	0	0	0.111111	0	0	0	1	0.3	0	0	0	0	0.25	1	0	0	0	0	0	0.25
0,3,2,6	0	0	0	0.2	0	0	0	0	0	0	0	0	0	0	0	0	0	0	0	0	0
0,3,-2,-6	0	0	0	0	0	0	0	0	0	0	0.666667	0	0	0	0	0	0	0	0	0	0
0,-3,2,6	0	0	0	0	0	0	0	0	0	0	0	0	0	0	0	0	0.111111	0	0	0	0
0,-3,-2,6	0.0285714	0	0	0	0	0	0	0	0	0	0	0	0	0	0	0	0	0	0	0	0
0,-3,-2,-6	0	0	0	0	0	0.0526316	0	0	0	0	0	0	0	0.25	0	0	0	0	0	0.333333	0.25
0,3,2,-7	0	0	0	0	0	0.166667	0	0	0	0	0	0	0	0	0	0	0	0	0	0	0
0,-3,2,-7	0	0	0	0	0	0	0	0	0	0	0	0	0	0	0	0.0909091	0	0	0	0	0
0,-3,-2,7	0	0	0	0	0	0	0.0909091	0	0	0	0	0	0	0	0	0	0	0	0	0	0
0,-3,-2,-7	0	0.1	0	0	0	0.0526316	0.0909091	0	0	0	0	0	0	0	0	0	0	0	0	0	0
0,3,-2,-9	0	0	0	0	0	0	0	0	0	0	0	1	0	0	0	0	0	0	0	0	0
0,-3,2,9	0	0	0	0	0	0	0	0	0	0	0	0	0	0	0	0.0909091	0	0	0	0	0
0,3,20,19	0	0	0	0	0	0	0	0	0	0	0	0	0	0	0	0	0	0	0	0	1
0,-3,-21,-20	0	0	0	0	0	0	0	0	0	0	0	0	0	0	0	0	0	0	0	1	0
0,-3,23,24	0	0	0	0	0	0	0	0	0	0	0	0	0	0	1	0	0	0	0	0	0
0,3,3,0	0	0	0	0	0.5	0	0	0.777778	0	0	0.166667	0.25	0	0	1	0.142857	0	0	0	0	0.333333
0,3,-3,0	0	0	0	0	0	0	0	0	0	0	0	0	0	0	0	0.5	1	0	0	0	1
0,-3,3,0	0	0	0	0	0	0	0	0	0	0	0	1	0	0	0	0	1	0	0	0	0
0,-3,-3,0	0	0.25	0	0	0	0	0	0	0	0	0	0.333333	0	0.5	0	0.125	0.2	0	1	0	0.2
0,3,3,1	0	0.5	1	0	0	0	1	0	0	0	0	0.25	0	0	0	0	0	0.5	0	0.5	0
0,3,3,-1	0	0	0	1	0	0	0	0	0	0	0	0	0	0	0	0	0	0	0	0	0
0,3,-3,1	0	1	0	0	0	0	0	0	0	0	0	0	0	0	0	0	0	0	0	0	0
0,-3,3,1	0	0	0	0	0	0	0	0	0	0	0	0	0	0	0	0	0	0	1	0	0
0,-3,3,-1	0	0	0	0	0	0	0	0	0	0.5	0	0	0	0	0	0	0	0	0	0	0
0,-3,-3,1	0	0	0	0	0	0	0	0	0	0	0	0	0	0	0	0	0	0	0	0	0.2
0,-3,-3,-1	0	0	0	0	0	0	0	0	0	0	0	0	0	0	0	0.125	0.2	0.75	0	0	0
0,-3,3,-10	0	0	0	0	0	0	0	0	0	0	0	0	0	0	0	0.5	0	0	0	0	0
0,-3,-3,11	0	0	0	0	0	0	0	0	0	0	0	0	0	0	0	0	0.2	0	0	0	0
0,-3,-3,12	0	0	0	0	0	0	0	0	0.25	0	0	0	0	0	0	0	0	0	0	0	0
0,-3,-3,14	0	0	0	0	0	0	0	0	0	0	0	0	0	0	1	0	0	0	0	0	0
0,-3,-3,-15	0	0	0	0	0	0	0	0	0	0	0	0	0	0	0	0	0	0	0	0.5	0
0,3,3,2	0	0	0	0	0	0	0	0	0	0	0	0.5	0	0.333333	0	0	0	0	0	0	0
0,3,3,-2	0	0	0	0	0.5	0	0	0	0	0	0.5	0	0	0	0	0	0	0	0	0	0
0,-3,3,2	0	1	0	0	0	0	0	0	0	0	0	0	1	0	0	0	0	0	0	1	0
0,-3,3,-2	0	0	0	0	0	0	0	0	0	0	0	0	0	0	0	0.5	0	0	0	0	1
0,-3,-3,2	0	0	0	0	0	0	0	0	0	0	0	0	0	0	0	0	0.2	0	0	0	0.2
0,-3,-3,-2	0	0.25	0	0	0	0	0	0	0.25	0	0	0	0	0	0	0	0	0	0	0	0
0,3,3,-24	0	0	0	0	0	0	0	0	0	0	0	0	0	0	0	0	0	0	0	0.5	0
0,3,3,3	0	0.5	0	0	0	0	0	0	0	0	0.0833333	0	0	0	0	0.428571	0.5	0	0	0	0.666667
0,-3,3,-3	0	0	0	0	0	0	0	0	0	0	0	0	0	1	0	0	0	0	0	0	0
0,-3,-3,-3	0	0.5	0	0	0	0	0	0.333333	0	0	0.25	0.333333	0	0	0	0.375	0	0	0	0	0
0,3,3,4	0	0	0	0	0	0	0	0	0	0	0.166667	0	0	0.333333	0	0	0.166667	0	0	0	0
0,3,3,-4	0	0	0	0	0	0	0	0	0	0	0	0	0	0	0	0	0.166667	0	0	0	0
0,-3,3,4	0	0	1	0	0	0	0	0	0	0.5	0	0	0	0	0	0	0	0	0	0	0
0,-3,-3,4	0	0	0	0	0	0	0	0	0	0	0	0.333333	0	0	0	0	0	0.25	0	0	0
0,-3,-3,-4	0	0	0	0	1	0	0	0	0	0	0.25	0	0	0	0	0	0	0	0	0	0
0,3,3,5	0	0	0	0	0	0	0	0.111111	0	0	0	0	0	0	0	0.428571	0	0	0	0	0
0,3,3,-5	0	0	0	0	0	0	0	0	0	0	0.0833333	0	0	0	0	0	0	0	0	0	0
0,3,-3,5	0	0	0	0	0	0	0	0	0	0	0	0	0	0	0	0.5	0	0	0	0	0
0,-3,-3,5	0	0	0	0	0	0	0	0.333333	0	0	0	0	0	0	0	0	0	0	0	0	0
0,-3,-3,-5	0	0	0	0	0	0	0	0	0.25	0	0.5	0	0	0	0	0.375	0	0	0	0	0
0,3,3,6	0	0	0	0	0	0	0	0.111111	0	0	0	0	0	0.333333	0	0	0.166667	0	0	0	0
0,-3,-3,-6	0	0	0	0.5	0	0	0	0	0	0	0	0	0	0.5	0	0	0	0	0	0.5	0.2
0,3,3,7	0	0	0	0	0	0	0	0	0	0	0	0	0	0	0	0	0	0.5	0	0	0
0,-3,3,7	0	0	0	0	0	0	1	0	0	0	0	0	0	0	0	0	0	0	0	0	0
0,-3,-3,-7	0	0	0	0.5	0	0	0	0.333333	0.25	0	0	0	0	0	0	0	0.2	0	0	0	0.2
0,3,4,0	0	0	0	0	0	0.2	0	0	0	0	0	0	0.166667	0.25	0	0	1	0	0	0	0
0,3,-4,0	0	0	0	0	0	0	0	0	0	0	0	0	1	0	0	0	0.333333	0	0	0	0
0,-3,4,0	0	0.333333	0	0	0	0	0	0	0	0	0	0	1	0	1	0	1	0.4	0	0	0.4
0,-3,-4,0	0	0	0	0	0	0	0	0	0	0	0	0	0	0.125	0	0	0	0	0	0	0
0,3,4,1	0	0	0	0	0	0	0	0	0	0	0	0	0.333333	0	0	0	0	0	0	0	0
0,3,-4,1	0	0	0	0	0	0	0	0	0	0	0	0	0	0	0.333333	0	0	0	0	0	0
0,-3,4,1	0	0	0	0	0	0.666667	0	0	0	0	0	0	0	0.5	0	0	0	0	0	0	0
0,-3,-4,1	0	0	0	0	0	0.142857	0	0	0	0	0	0	0	0	0	0.2	0	0	0	0	0
0,-3,-4,-1	0	0	0	0	0	0	0.111111	0	0	0	0.2	0	0.5	0	0	0	1	0	0	0	1
0,3,4,11	0	0	0	0	0	0	0	0	0	0	0	0	0	0	0	0.5	0	0	0	0	0
0,-3,-4,-13	0	0	0	0	0	0	0	0	0	0	0.2	0	0	0	0	0	0	0	0	0	0
0,3,4,2	0	0	0	0.333333	0	0	0	0	0	0	0	0	0	0	0	0	0	0	0	0	0
0,3,-4,-2	0	0	0	0	0	0	0	0	0	0	0	0	0	0	0.666667	0	0.666667	0	0	0	0
0,-3,4,2	0	0.666667	0	0	0	0	0	0	0	0	0	0.5	0	0	0	0	0	0.6	0	1	0.6
0,-3,-4,2	0	0	0	0	0	0	0	0	0	0	0	0	0	0.125	0	0	0	0	0	0	0
0,3,4,3	0	0.2	0	0	0	0.2	0.166667	0	0	0	0.666667	0	0.333333	0.25	0	0.5	0	0	0	0	0
0,3,4,-3	0	0	0	0	0	0	0	0	1	0	0	0	0	0.25	0	0	0	0	0	1	0
0,3,-4,3	0	0	0	0	0	0	0	0	0	0	0	0	0	0	0	0	0	0.5	0	0.5	1
0,3,-4,-3	0	0	0	0	0	0	0	0	0	0	0	0	0	1	0	0	0	0	0	0	0
0,-3,4,3	0	0	0	0	0	0.333333	1	0	0	0	0	0	0	0	0	0	0	0	0	0	0
0,-3,4,-3	0	0	0	0	0	0	0	0.666667	0	0	0	0	0	0	0	0	0	0	0.5	0	0
0,-3,-4,3	0.111111	0	0	0	0	0	0	0	0	0	0	0	0	0	0	0.2	0	0	0	0	0
0,-3,-4,-3	0.444444	0	0.5	0.25	0	0.142857	0	0	0	0	0	0	0	0	1	0	0	0	0	0	0
0,3,4,4	1	0	0	0	0	0	0	0	0	0	0	0	0	0	0	0	0	0	0	0	0
0,-3,4,4	0	0	0	0	0.5	0	0	0	0	0	0	0.5	0	0.5	0	0	0	0	0	0	0
0,-3,-4,4	0.111111	0	0	0.25	0	0	0.111111	0	0	0	0	0	0	0	0	0	0	0	0	0	0
0,-3,-4,-4	0	0.166667	0	0	0	0.0714286	0	0	0	0	0	0	0	0	0	0.4	0	0	0	0	0
0,3,4,5	0	0.2	0	0	0.5	0	0.166667	0	0	0	0	0	0	0	0	0	0	0	0	0	0
0,-3,4,5	0	0	1	0	0.25	0	0	0	0	0	0	0	0	0	0	0	0	0	0	0	0
0,-3,-4,-5	0.222222	0.166667	0	0.25	0	0.428571	0.222222	0	0	0	0	0	0.5	0.375	0	0	0	0	0	0	0
0,3,4,6	0	0.2	0	0	0	0	0.333333	0	0	1	0.333333	0	0	0	0	0	0	0	0	0	0
0,-3,4,6	0	0	0	0	0	0	0	0.333333	0	0	0	0	0	0	0	0	0	0	0.5	0	0
0,-3,-4,-6	0.111111	0.5	0.5	0.25	0.5	0.214286	0.444444	0	0	1	0.6	0	0	0.125	0	0.2	0	0	0	0	0
0,3,4,7	0	0.4	0	0.666667	0.5	0.6	0.333333	0	0	0	0	0	0	0	0	0	0	0	0	0	0
0,3,4,-7	0	0	0	0	0	0	0	0	0	0	0	0	0.166667	0	0	0	0	0	0	0	0
0,-3,-4,-7	0	0	0	0	0	0	0.111111	0	0	0	0	0	0	0	0	0	0	0	0	0	0
0,3,-4,8	0	0	0	0	0	0	0	0	0	0	0	0	0	0	0	0	0	0	0	0.5	0
0,-3,4,-8	0	0	0	0	0.25	0	0	0	0	0	0	0	0	0	0	0	0	0	0	0	0
0,-3,-4,-8	0	0.166667	0	0	0.5	0	0	0	0	0	0	0	0	0	0	0	0	0	1	0	0
0,3,4,9	0	0	0	0	0	0	0	0	0	0	0	0	0	0.25	0	0	0	0	0	0	0
0,3,-4,-9	0	0	0	0	0	0	0	0	0	0	0	0	0	0	0	0	0	0.5	0	0	0
0,-3,4,9	0	0	0	0	0	0	0	0	1	0	0	0	0	0	0	0	0	0	0	0	0
0,-3,-4,-9	0	0	0	0	0	0	0	0	0	0	0	0	0	0.25	0	0	0	0	0	0	0
0,3,5,0	0	0	0	0	0	0	0	0	0	0.25	0	0.2	0	0	0	0	0	0	0.571429	0	0.166667
0,3,-5,0	0	0	0	0	0	0	0	0	0	0	0	0	0	0.5	0	0	0	0	0	0	0
0,-3,5,0	0	0	0	0	0	0	0	0	0	0	0	0	0	0.333333	0	0	0	1	0	0	0
0,-3,-5,0	0	0	0	0	0	0	0	0	0	0	0	0	0.142857	0	0	0	0.166667	0	0.0769231	0.2	0
0,3,5,1	0	0	0	0	0	0	0	0	0	0	0	0	0	0	0.166667	0.0833333	0	0	0	0.0909091	0
0,3,5,-1	0	0	0	0	0	0	0	0	0	0	0	0	0	0	0	0	0.166667	0	0	0	0
0,-3,5,1	0	0	0	0	0	0	0	0	0	0	0	0	0	0	0	0	0.5	0	0	0	0
0,-3,-5,1	0	0	0	0	0	0	0	0	0	0	0	0	0	0	0.166667	0	0	0	0	0	0.111111
0,-3,-5,-1	0	0	0	0	0	0	0	0	0.0909091	0	0	0	0	0	0	0	0.166667	0	0.0769231	0	0
0,3,5,10	0	0	0	0	0	0	0	0	0	0.25	0	0	0	0	0	0	0	0	0	0	0
0,-3,-5,-10	0.25	0	0	0	0	0	0.25	0	0	0	0	0	0	0	0	0	0	0	0	0.1	0
0,3,5,12	0	0	0	0	0	0	0	0	0	0	0	0	0.142857	0	0	0	0	0	0	0	0
0,-3,5,-12	0.333333	0	0	0	0	0	0	0	0	0	0	0	0	0	0	0	0	0	0	0	0
0,-3,-5,-12	0	0	0	0	0	0	0	0	0	0	0	0	0	0	0	0	0	0	0.0769231	0	0
0,-3,-5,-17	0	0	0	0	0	0	0	0	0	0	0	0	0	0	0	0	0.166667	0	0	0	0
0,3,5,2	0	0	0	0	0.333333	0	0.4	0	1	0	0	0	0	0	0.166667	0.0833333	0.166667	0	0	0	0.166667
0,3,5,-2	0	0	0	0	0	0	0	0	0	0	0	0	0	0	0	0	0	0	0	0	0.166667
0,-3,5,2	0	1	0	0	0	1	0	0	0	0	0	0	0	0	0	0	0	0	1	0	0
0,-3,-5,2	0	0	0	0	0	0.142857	0	0	0	0	0	0	0	0.25	0	0	0	0	0.0769231	0	0
0,-3,-5,-2	0	0	0	0	0.142857	0	0	0	0	0	0	0	0.142857	0	0	0	0	0	0	0.1	0.111111
0,3,5,3	0	0	0	0	0	0.142857	0.2	0	0	0	0	0.2	0.142857	0.666667	0.166667	0.333333	0.333333	0.333333	0.285714	0.272727	0.166667
0,3,-5,3	0	0	1	0	0	0	0	0	0	0	0	0	0	0.5	0	0	0	0	0	0	0
0,-3,5,3	0	0	0	0	0	0	0	0	0	1	0	0	0	0	0	0	0.5	0	0	0	0
0,-3,5,-3	0	0	0	0	0	0	0	0	0	0	0	0	0	0.333333	0	0	0	0	0	0	0
0,-3,-5,-3	0	0	0	0	0.142857	0	0	0.333333	0.363636	0	0	0.285714	0.285714	0	0.166667	0.0833333	0.166667	0	0	0.4	0
0,3,5,-4	0	0	0	0	0	0	0	0	0	0	0	0	0	0	0.166667	0	0	0	0	0	0
0,3,-5,-4	0	0	0	0	0	0	0	0	1	0	0	0	0	0	0	0	0	0	0	0	0
0,-3,5,4	0	0	0	0	0	0	0	0	0	0	0	0	0	0.333333	0	0	0	0	0	0	0
0,-3,-5,4	0	0	0	0	0	0	0	0	0	0	0	0	0.142857	0	0	0	0	0	0	0	0
0,-3,-5,-4	0.25	0	0	0.5	0.142857	0.142857	0	0	0.0909091	0	0	0	0	0.25	0	0	0	0	0	0	0.111111
0,3,5,5	0	0	0.333333	0	0	0	0	0.5	0	0	0	0	0.285714	0	0	0.166667	0	0.333333	0	0.0909091	0
0,-3,5,5	0	0	0	0	1	0	0	0	0	0	0	0	0	0	0	0	0	0	0	0	0
0,-3,-5,5	0	0	0	0	0	0	0	0	0	0	0	0	0	0	0	0	0	0	0	0	0.111111
0,-3,-5,-5	0	0	0	0	0	0	0	0	0	0	0.125	0.142857	0	0.25	0	0	0	0	0	0	0
0,3,5,6	0	1	0.333333	1	0.666667	0.714286	0.4	0	0	0	0	0.2	0	0.333333	0	0	0.333333	0	0.142857	0.181818	0
0,-3,5,6	0.666667	0	0	0	0	0	0	0	0	0	0	0	0	0	0	0	0	0	0	0	0
0,-3,-5,6	0	0	0	0	0	0	0	0	0	0	0	0	0.142857	0	0	0	0	0	0	0	0
0,-3,-5,-6	0	0	0.333333	0.5	0.142857	0.142857	0.75	0	0	0.666667	0	0	0	0	0	0	0	0	0.0769231	0.1	0
0,3,5,7	0	0	0	0	0	0	0	0.5	0	0.25	1	0.2	0.142857	0	0.333333	0.25	0	0.333333	0	0.0909091	0
0,-3,-5,7	0	0	0	0	0	0	0	0	0	0	0	0	0	0.25	0	0	0	0	0	0	0
0,-3,-5,-7	0.5	1	0	0	0.285714	0	0	0.5	0.272727	0	0.75	0.571429	0.142857	0	0.5	0.5	0.166667	1	0.384615	0.1	0.222222
0,3,5,8	0	0	0.333333	0	0	0.142857	0	0	0	0.25	0	0.2	0.285714	0	0	0.0833333	0	0	0	0.272727	0.333333
0,-3,-5,-8	0	0	0.666667	0	0.142857	0.428571	0	0.166667	0.181818	0	0.125	0	0	0	0.166667	0.416667	0.166667	0	0.153846	0	0.333333
0,-3,-5,-9	0	0	0	0	0	0.142857	0	0	0	0.333333	0	0	0	0	0	0	0	0	0.0769231	0	0
0,-3,6,0	0	0	0	0	0	0	0	0	0	0	0	0	0	0	0	0	1	0	0	0	0
0,-3,-6,0	0	0	0	0	0	0	0	0	0	0	0	0	0	0	0	1	0.333333	0	0	0	0.2
0,3,6,1	0	0.125	0	0	0	0	0.2	0	0	0	0	0	0	0	0	0.333333	0	0	0	0	0
0,-3,-6,1	0	0	0	0	0	0.285714	0	0	0	0	0	0	0	0.125	0	0	0	0	0	0	0
0,-3,-6,-1	0	0	0	0	0	0	0	0	0	0	0	0	0	0	0.333333	0	0.333333	0	0.6	0	0
0,3,6,10	0.333333	0	0	0	0	0	0.2	0	1	0	0	0.5	0	0	0	0	0	0	0	0	0
0,3,6,-10	0	0	0	0	0	0	0	0	0	0	0	0	0	0.0833333	0	0	0	0	0	0	0
0,-3,-6,-10	0	0	0	0	0	0	0	0	0	0	0	0	0	0.25	0	0	0	0	0	0.25	0.6
0,3,6,11	0	0	0	0	0.125	0.142857	0.2	0	0	0	0	0	0.5	0	0	0	0.25	0	0	0	0
0,3,6,12	0	0	0	0	0	0	0	0	0	0	0	0	0	0.0833333	0	0	0	0	0	0	0
0,3,6,13	0	0	0	0	0	0	0	0	0	0	0	0.25	0	0	0	0	0	0	0	0	0
0,-3,-6,-15	0	0	0	0	0	0	0	0	0	0	0	0	0	0	0	0	0	0	0	0.25	0
0,3,6,2	0	0	0	0	0	0	0	0	0	0	0	0	0.5	0	0	0	0	0	0	0	0
0,-3,6,2	1	0	0	0	0.5	1	0	0	0	0	0	0	0	0	0	0	0	0	0	0	1
0,-3,-6,2	0.333333	0	0	0	0	0.142857	0	0	0	0	0	0	0	0	0	0	0.333333	1	0	0	0
0,-3,-6,-2	0	0	0	0	0	0	0	0	0	0	0	0	0	0	0	0	0	0	0.2	0	0
0,3,6,3	0	0	0	0	0	0.142857	0	0	0	0	0.5	0	0	0	0	0.333333	0	0	0	0	0.5
0,-3,6,3	0	0	0	0	0	0	0	0	0	0	0	0	0	1	0	0	0	0	0	0	0
0,-3,-6,3	0	0	0	0	1	0	0	0	0	0	0	0	0	0.125	0	0	0	0	0	0	0
0,-3,-6,-3	0	0	0.333333	0	0	0	0	0	0	0	0	1	0	0	0.333333	0	0	0	0.2	0	0
0,3,6,4	0.666667	0	0	0	0.125	0	0	0	0	0	0	0	0	0	0	0	0.25	0	0	1	0
0,-3,-6,4	0	0	0.333333	0	0	0	0	0	0	0	0	0	0	0	0	0	0	0	0	0	0
0,-3,-6,-4	0	0	0	0	0	0	0	0	0	0	0	0	0	0	0	0	0	0	0	0	0.2
0,3,6,5	0	0.25	0.5	0.5	0	0.142857	0.2	0	0	0	0	0.25	0	0	1	0	0	0	0	0	0.5
0,-3,-6,-5	0	0	0	1	0	0	0.5	0	0	0	0	0	0	0	0.333333	0	0	0	0	0	0
0,3,6,6	0	0	0.5	0	0	0	0	0	0	0	0.5	0	0	0	0	0.333333	0	0	0	0	0
0,-3,6,6	0	0	0	0	0.5	0	0	0	0	0	0	0	0	0	0	0	0	0	0	0	0
0,3,6,7	0	0.25	0	0.5	0.125	0	0.2	0	0	0	0	0	0	0.0833333	0	0	0.25	0	0	0	0
0,-3,-6,-7	0.333333	1	0	0	0	0	0	0	0	0.333333	0	0	1	0.25	0	0	0	0	0	0	0
0,3,6,8	0	0	0	0	0.125	0.428571	0	0	0	1	0	0	0	0.166667	0	0	0.25	0	0	0	0
0,-3,-6,8	0	0	0	0	0	0	0	0	0	0.333333	0	0	0	0	0	0	0	0	0	0	0
0,-3,-6,-8	0.333333	0	0.333333	0	0	0.142857	0.5	0	1	0	1	0	0	0.125	0	0	0	0	0	0.5	0
0,3,6,9	0	0.375	0	0	0.5	0.142857	0	0	0	0	0	0	0	0.583333	0	0	0	0	0	0	0
0,-3,-6,-9	0	0	0	0	0	0.428571	0	0	0	0.333333	0	0	0	0.125	0	0	0	0	0	0	0
0,3,7,0	0	0.142857	0	0	0	0.0769231	0	0	0	0	0	0	0	0	0	0	0	0	0	0.25	0
0,-3,-7,0	0	0	0	0	0	0	0	0	0	0	0	0	0.0833333	0	0	0	0.0909091	0.0769231	0	0.111111	0
0,3,7,1	0	0	0	0	0	0	0	0	0	0	0	0	0	0	0.2	0	0	0	0	0	0
0,3,7,-1	0	0	0	0	0	0.0769231	0	0	0	0	0	0	0	0	0	0	0	0	0	0	0
0,-3,-7,1	0.166667	0	0	0	0	0	0	0	0	0	0	0	0	0.166667	0	0	0.0909091	0	0	0	0.2
0,-3,-7,-1	0	0	0	0	0	0	0	0	0	0	0	0	0	0	0	0	0	0	0	0	0.1
0,3,7,10	0.625	0	0.666667	0.166667	0.333333	0.307692	0.272727	0	0.8	0	0.75	0.333333	0	0.333333	0.2	0.5	0	0	0	0.25	0.166667
0,-3,7,10	0	0	0	0	0	0.333333	0	0	0	0	0	0	0	0	0	0	0	0	0	0	0
0,-3,-7,-10	0.166667	0.333333	0.416667	0.333333	0.529412	0.538462	0.5	0	0	1	0.363636	0.666667	0.25	0.166667	0.333333	0	0.0909091	0.153846	0	0.444444	0
0,3,7,11	0	0	0	0	0	0	0.181818	0	0	0	0	0	0.111111	0	0	0	0	0	0	0	0.0833333
0,-3,-7,-11	0.333333	0.166667	0	0	0	0.0769231	0	0	0	0	0	0	0.166667	0.166667	0	0	0	0	0	0	0
0,3,7,12	0.125	0.285714	0	0	0	0	0	0	0	0	0.25	0	0	0	0	0	0	0.5	0	0.125	0.0833333
0,-3,-7,12	0	0	0	0	0.0588235	0	0	0	0	0	0	0	0	0	0	0	0	0	0	0	0
0,-3,-7,-12	0	0	0	0	0.0588235	0	0.125	0	0	0	0.363636	0	0	0	0	0	0.0909091	0	0.142857	0	0
0,3,7,14	0	0	0.0666667	0	0	0	0	0	0	0	0	0	0	0.333333	0	0	0	0	0	0	0
0,-3,-7,-15	0	0	0.0833333	0	0	0	0	0	0	0	0	0	0	0	0	0	0	0	0	0	0
0,3,7,2	0	0.142857	0	0	0	0	0	0	0	0	0	0	0	0	0	0	0	0	0	0	0.0833333
0,-3,-7,2	0	0	0	0	0.0588235	0	0	0	0	0	0	0	0	0	0	0	0	0.0769231	0.142857	0	0
0,-3,-7,-2	0	0	0	0.666667	0	0	0.125	0	0	0	0	0	0	0	0	0	0	0	0.142857	0	0.1
0,3,7,3	0	0	0.0666667	0.166667	0	0.0769231	0	0	0.2	0.5	0	0	0.333333	0.333333	0	0	0	0	0	0	0.166667
0,3,-7,3	0	0	0	0	0	0	0	0	0	0	0	0	0	0	0	0	0	0	0	0	1
0,-3,7,3	0	0	0	0	0	0	0	0	0	0	0	0	0	0	0	0	0	0	0	0	0.5
0,-3,-7,3	0	0	0	0	0	0.0769231	0	0	0	0	0	0	0	0.166667	0	0	0	0	0.142857	0	0
0,-3,-7,-3	0	0	0	0	0	0	0	0	0	0	0	0	0.166667	0.166667	0.133333	0	0.0909091	0.0769231	0.142857	0	0.2
0,3,7,4	0	0	0	0	0	0	0.0909091	0	0	0	0	0	0.111111	0	0	0	0.5	0	0	0	0
0,3,7,-4	0	0	0	0	0.111111	0	0	0	0	0	0	0	0	0	0	0	0	0	0	0	0
0,-3,7,4	1	0	0	0	0	0.333333	0	0	0	0	1	0	1	0	0	0	0	0	0	0	0.5
0,-3,-7,4	0	0	0	0	0	0.0769231	0	0	0	0	0	0	0	0	0	0	0	0	0	0	0
0,-3,-7,-4	0	0	0	0	0	0	0	0	0	0	0.0909091	0	0	0	0	0.285714	0	0	0	0	0.1
0,3,7,5	0.125	0.285714	0.0666667	0	0.222222	0.0769231	0	0	0	0	0	0.333333	0.222222	0	0.4	0.5	0	0.5	1	0.25	0.333333
0,-3,-7,5	0	0	0	0	0	0	0	0	0	0	0	0	0	0	0	0.142857	0	0	0	0	0
0,-3,-7,-5	0.166667	0.166667	0.25	0	0.0588235	0	0	0	0	0	0	0.333333	0	0	0.4	0.285714	0.272727	0.615385	0.142857	0.111111	0.2
0,3,7,6	0	0	0	0	0.222222	0.384615	0.272727	0	0	0.5	0	0.333333	0	0	0.2	0	0	0	0	0	0
0,3,-7,-6	0	0	0	0	1	0	0	0	0	0	0	0	0	0	0	0	0	0	0	0	0
0,-3,7,-6	0	0	0	0	0	0.333333	0	0	0	0	0	0	0	0	0	0	0	0	0	0	0
0,-3,-7,-6	0.166667	0.0833333	0	0	0	0	0	0	0	0	0	0	0	0	0	0	0	0	0	0	0
0,3,7,7	0	0	0.133333	0.166667	0	0	0	1	0	0	0	0	0	0	0	0	0	0	0	0	0
0,-3,7,7	0	0	0	0	0.5	0	0	1	0	0	0	0	0	0	0	0	0	0	0	0.5	0
0,-3,-7,-7	0	0	0.0833333	0	0	0	0	0	0	0	0.0909091	0	0	0.166667	0.0666667	0.142857	0.0909091	0	0.142857	0	0
0,3,7,8	0.125	0.142857	0	0.5	0.111111	0	0.181818	0	0	0	0	0	0.222222	0	0	0	0	0	0	0.125	0
0,-3,7,8	0	0	1	0	0	0	0	0	0	0	0	0	0	0	0	0	0	0	0	0	0
0,-3,-7,-8	0	0.25	0.166667	0	0.235294	0.230769	0.125	0	0	0	0	0	0.333333	0	0.0666667	0.142857	0	0	0	0	0
0,3,7,9	0	0	0	0	0	0	0	0	0	0	0	0	0	0	0	0	0.5	0	0	0	0.0833333
0,-3,7,9	0	0	0	0	0.5	0	0	0	0	0	0	0	0	0	0	0	0	0	0	0.5	0
0,-3,-7,-9	0	0	0	0	0	0	0.125	0	1	0	0.0909091	0	0	0	0	0	0.181818	0	0	0.333333	0.1
0,-3,-8,0	0	0	0	0	0	0	0	0	0	0	0	0	0	0.333333	0	0	0	0	0	0	0
0,3,8,-1	0	0	0	0	0	0	0	0	0	0	0	0	0	0.25	0	0	0	0	0	0	0
0,-3,-8,-1	0	0	0.222222	0	0	0	0	0	0	0	0	0	0	0.333333	0	0	0	0	0	0	0
0,3,8,10	0	0	0	0	0	0.5	0.333333	0	0.5	0.333333	0	0	0	0	0	0	0	0	0.5	0	0
0,-3,-8,-10	0	0.2	0.111111	0	0	0	0	0	0	0	0	0	0	0	0.666667	0	0	0.333333	0	0.5	0
0,3,8,11	0	1	0	0	0	0	0	0	0	0	0.5	0	0	0	0	0	0	0	0	0	0
0,-3,-8,-11	0	0	0	0	0	0	1	0	0	0	0.142857	0	0	0	0	0	0	0	0	0	0
0,3,8,12	0	0	0	0	0	0	0	0	0.5	0	0.5	1	0	0.5	1	0	0.333333	0	0	0	0
0,-3,-8,-12	0.333333	0	0.555556	0	0	0	0	0	0	1	0.428571	0	0	0.333333	0	0	0	0.333333	0	0.25	0
0,3,8,-2	1	0	0	0	0	0	0	0	0	0.333333	0	0	0	0	0	0	0	0	0	0	0
0,-3,-8,2	0	0	0	0	0	0	0	0	0	0	0	0	0.5	0	0	0	0	0	1	0	0
0,3,8,3	0	0	0	0	0	0	0.333333	0	0	0	0	0	0	0	0	0	0	0	0.25	0	0
0,-3,-8,-3	0	0.2	0	0	0	0	0	1	0	0	0	0	0	0	0	0	0.333333	0	0	0	0
0,3,8,4	0	0	0	0	0.5	0	0	0	0	0.333333	0	0	0	0	0	0	0	0	0	0	0
0,-3,-8,4	0	0	0	0	0	0	0	0	0	0	0.428571	0	0	0	0	0	0	0	0	0	0
0,-3,-8,-4	0	0	0.111111	0	0	0	0	0	0	0	0	0	0.5	0	0	0	0	0	0	0	0
0,3,8,5	0	0	0	0	0	0.5	0	0	0	0	0	0	0	0	0	0	0.333333	0	0	0	0
0,-3,-8,-5	0	0.2	0	0	0	0	0	0	0	0	0	0	0	0	0	0	0.333333	0	0	0	0
0,3,8,6	0	0	0	0	0.5	0	0	0	0	0	0	0	1	0	0	0	0.333333	0	0	1	0
0,-3,-8,-6	0	0	0	0	0	0	0	0	0	0	0	0	0	0	0.333333	0	0	0	0	0.25	0
0,3,8,7	0	0	0	0	0	0	0.333333	0	0	0	0	0	0	0	0	0	0	0	0.25	0	0
0,-3,-8,-7	0	0.2	0	0	0	0	0	0	0	0	0	1	0	0	0	0	0	0	0	0	0
0,-3,-8,-8	0	0.2	0	0	0	0	0	0	0	0	0	0	0	0	0	0	0.333333	0.333333	0	0	0
0,3,8,9	0	0	0	0	0	0	0	0	0	0	0	0	0	0.25	0	0	0	0	0	0	0
0,-3,-8,-9	0.666667	0	0	0	0	0	0	0	0	0	0	0	0	0	0	0	0	0	0	0	0
0,-3,-9,-1	0	0	0	0	0	0	1	0	0	0	0	0	0	0	0	0	0	0	0	0	0
0,-3,9,11	0	0	0	0	0	0	0	0	0	0	0	0	0	0	0	1	0	0	0	1	0
0,3,-9,-12	0	0	0	0	0	0	0	0	0	0	0	0	0	0	0	1	0	0	0	0	0
0,-3,9,14	1	0	0	0	0	0	0	0	0	0	0	0	0	0	0	0	0	0	0	0	0
0,3,9,2	0	0	0	0	0	0	0	0	0	0	0	0	0	0	0	0	1	0	0	0	0
0,3,-9,3	0	0	0	0	0	0	0	0	0	0	0	0	0	0	0	0	0	0	0	0	1
0,-3,-9,-5	0	0	0	0	0	0	0	0	0	0	0	0	0	0	0	1	0	0	0	0	0
0,-3,-9,-6	0	0	0	0	0	0	0	0	0	0	0	0	0	0	0	0	1	0	0	0	0
0,-3,9,-7	0	0	0	0	0	0	0	0	0	0	0	1	0	0	0	0	0	0	0	0	0
0,3,9,8	0	0	0	0	0	0	0	0	0	0	0	0	0	1	0	0	0	1	0	0	0
0,-30,-28,-26	0	0	0	0	0	0	0	0	0	1	0	0	0	0	0	0	0	0	0	0	0
0,4,0,0	0	0	0	0	0	0	0	0.5	0.666667	0	0	0	0	0	0	0	0	0	0	0	0
0,-4,0,0	0	0	0	0	0	0	0	0.142857	0	0	0	0	0	0	0	0	0	0	0	0	0.2
0,4,0,1	0	0	0	0	0	0.333333	0	0	0	0	0	0	0	0	0	0	0	0	0	0	0
0,4,0,-1	0	0	0	0	0	0	0	0	0	0	0	0	0	0	0	0	0	0	0	0	0.166667
0,-4,0,1	0	0	0	0	0	0	1	0	0	0	0	0	0.181818	0	0	0	0	0	0	0	0
0,-4,0,-1	0	0	0	0	0	0	0	0	0	0	0	0	0	0.333333	0	0	0	0	0	0	0
0,4,0,10	0	0	0	0	0	0	0	0	0	0	0	0	0	0	0	0	0	0	0	0	0.166667
0,4,0,-12	0	0	0.5	0	0	0	0	0	0	0	0	0	0	0	0	0	0	0	0	0	0
0,4,0,2	1	0	0	0	0	0	0	0	0	1	0	0	0	0.25	0	0	0	0	0.5	1	0
0,4,0,-2	0	0	0	0	0	0	0	0	0.333333	0	0	0	0	0	0.5	0	0	0	0	0	0
0,-4,0,2	0	0	0	0	0	0	0	0	0	0	0.142857	0	0.0909091	0	0	1	0	0	0.333333	0	0.2
0,-4,0,-2	0	0	0	0	0	0	0	0.142857	0	0	0	0	0.0909091	0	0.25	0	0.5	0	0.333333	0	0.2
0,4,0,3	0	0	0	0	0	0	1	0	0	0	0.111111	0	0	0	0	0	0	0	0	0	0.166667
0,4,0,-3	0	0	0.5	0	0	0	0	0	0	0	0	0	0.285714	0	0.5	0	0.666667	1	0.5	0	0.166667
0,-4,0,3	0	1	0	0	0	0.5	0	0.142857	0	0	0	1	0.0909091	0.333333	0	0	0.5	0.5	0	0	0.2
0,4,0,4	0	0	0	0	0	0.333333	0	0.5	0	0	0.777778	0	0.142857	0	0	0	0	0	0	0	0.166667
0,4,0,-4	0	0	0	0	0	0	0	0	0	0	0	0	0	0.25	0	0	0	0	0	0	0
0,-4,0,4	0	0	0.5	0	0	0.5	0	0.428571	0	0	0	0	0.272727	0.333333	0	0	0	0	0	0	0
0,-4,0,-4	0	0	0	0	0	0	0	0.142857	0	0	0.857143	0	0.181818	0	0.25	0	0	0	0	0	0.2
0,4,0,5	0	0	0	0	0	0	0	0	0	0	0.111111	0	0.571429	0	0	0	0	0	0	0	0.166667
0,4,0,-5	0	0	0	0	0	0	0	0	0	0	0	0	0	0.25	0	0	0	0	0	0	0
0,-4,0,5	0	0	0.5	0	0	0	0	0	0	0	0	0	0	0	0	0	0	0	0.333333	0	0
0,-4,0,-5	0	0	0	0	0	0	0	0	0	0	0	0	0	0	0.5	0	0	0	0	0	0
0,4,0,6	0	0	0	0	0	0	0	0	0	0	0	0	0	0	0	0	0.333333	0	0	0	0
0,4,0,7	0	0	0	1	0	0	0	0	0	0	0	0	0	0	0	0	0	0	0	0	0
0,4,0,-7	0	0	0	0	0	0	0	0	0	0	0	0	0	0.25	0	0	0	0	0	0	0
0,-4,0,7	0	0	0	0	1	0	0	0	0	0	0	0	0	0	0	0	0	0.5	0	0	0
0,4,0,8	0	0	0	0	0	0.333333	0	0	0	0	0	0	0	0	0	0	0	0	0	0	0
0,-4,0,-9	0	0	0	0	0	0	0	0	0	0	0	0	0.0909091	0	0	0	0	0	0	0	0
0,4,-1,0	1	0	0	0	0	0	0	0	0	0	0	0	0	0	0	0	0	0	0	0	0
0,-4,1,0	0	0	0	0	0	0	0	0	0	0	0	0	0.5	1	0	0	0	0	0	0	0.5
0,-4,-1,0	0	0	0	1	0	0	0	0	0	0	0.333333	0	0	0	0	0	0	0	0	0	0
0,4,1,1	0	0	0	0	0	0	0	0	0	0	0	0	0	0	0	0	0	0	1	0	0
0,4,1,-1	0	0	0	0	0	0	0	0	0	0	0	0	1	0	0	0	0	0	0	0	0
0,-4,-1,1	0	0	0	0	0	0	0	0	0	0	0	0	1	0	0	0	0	0	0	1	0
0,-4,-1,-1	0	0	0	0	0	0	0	0	0	0	0	0	0	0	0	0.333333	0	0	0	0	0
0,4,1,2	0	0	0	0	0	0	0.5	0	0	0	0	0	0	0	0	0	0	0	0	0	0
0,4,1,-2	0	0	0	0	0	0	0	0	0	0	0	0	0	0.5	0	0	0	0	0	0	0
0,4,-1,2	0	1	0	0	0	0	0.5	0	0	0.5	0	1	1	0	0.5	0	0	0	0	0	0
0,4,-1,-2	0	0	0	0	0	1	0.5	0	0	0	0	0	0	0	0	0	0	0	0	0	0
0,-4,1,2	0	0	0	0.666667	0	0	0	0	0	0	0	0	0	0	0	0	0	0	0	0	0
0,-4,1,-2	0	0	0	0.333333	0	0	1	0	0	0	0	0	0	0	0	0	0	0	0	1	0
0,-4,-1,2	0	0	0	0	0	0	0	0	0	0	0	0	0	0	0	0	0	0	0	0	0.25
0,-4,-1,-2	0	0	0	0	1	0	0.333333	0	0	0	0	0	0	0.333333	0	0	0	0	0	0	0
0,-4,-1,-20	0	0	0	0	0	0	0	0	0	0	0	0	0	0	0	0.333333	0	0	0	0	0
0,-4,-1,-23	0	0	0	0	0	0	0	0	0	0.2	0	0	0	0	0	0	0	0	0	0	0
0,4,-1,-3	0	0	0	0	0	0	0	0	0	0	1	0	0	1	0.5	0	0	0	0	0	0
0,-4,-1,3	0	0	0	0	0	0	0	0	0	0	0	0	0	0	0	0	0	0	0	0	0.75
0,-4,-1,-3	0	0	0	0	0	0	0.666667	0	0	0.8	0.333333	0	0	0.333333	0	0	0	0	0	0	0
0,4,1,4	0	0	0	0	0	0	0	0	0	0	0	1	0	0	0	0	0	0	0	0	0
0,4,1,-4	0	0	0	0	0	0	0.5	0	0	0	0	0	0	0.5	0	0	1	0	0	0	0
0,4,-1,4	0	0	0	0	0	0	0	0	0	0.5	0	0	0	0	0	0	0	0	0	0	0
0,-4,1,-4	0	0	0	0	0	0	0	0	0	0	1	0	0.375	0	0	0	0	0	0	0	0.5
0,-4,-1,4	0	0.5	0	0	0	0	0	0	0	0	0	0	0	0	0	0	0	0	0	0	0
0,-4,-1,-4	0	0.5	0	0	0	1	0	0	0	0	0.333333	0	0	0	0	0.333333	0	0	0	0	0
0,4,-1,-5	0	0	0	0	0	0	0	0	0	0	0	0	0	0	0	0	0	0	0	0	1
0,-4,1,5	0	0	0	0	0	0	0	0	0	0	0	0	0.125	0	0	0	0	0	1	0	0
0,-4,-1,5	0	0	0	0	0	0	0	0	0	0	0	0	0	0	0	0	0	1	0	0	0
0,-4,-1,-8	0	0	0	0	0	0	0	0	0	0	0	0	0	0.333333	0	0	0	0	0	0	0
0,-4,-10,-5	0	0	0	1	0	0	0	0	0	1	0	0	0	0	0	0	0	0	0	0	0
0,4,11,4	0	0	0	0	0.5	0	0	0	0	0	0	0	0	0	0	0	0	0	0	0	0
0,4,11,6	0	0	0	0	0	1	0	0	0	0	0	0	0	0	0	0	0	0	0	0	0
0,4,11,7	0	0	0	0	0	0	0	0	0	0	0	1	0	0	0	0	0	0	0	0	0
0,4,11,8	0	1	1	0	0.5	0	0	0	0	0	0	0	0	0	0	0	0	0	0	0	0
0,-4,-11,-8	0	0	0	0	0	0	0	0	0	0	0	0	0	1	0	0	0	0	0	0	0
0,4,11,9	0	0	0	0	0	0	0	0	0	0	0	0	0	1	0	0	0	1	0	1	0
0,4,12,11	0	0	0	0	0	0	0	0	0	0	0	0	0	0	0	0	0	1	0	0	0
0,-4,-12,-11	0	0	1	0	0	0	0	0	0	0	0	0	0	0	0	0	0	0	0	0	0
0,4,12,7	0	0	0	0	0	0	1	0	0	0	0	0	0	0	0	0	0	0	0	0	0
0,-4,-14,0	0	0	0	0	0	0	0	0	1	0	0	0	0	0	0	0	0	0	0	0	0
0,-4,15,13	0	0	0	0	1	0	0	0	0	0	0	0	0	0	0	0	0	0	0	1	0
0,-4,-16,-12	0	0	1	0	0	0	0	0	0	0	0	0	0	0	0	0	0	0	0	0	0
0,-4,-16,4	0	0	0	0	0	0	0	0	0	1	0	0	0	0	0	0	0	0	0	0	0
0,4,2,0	1	0.5	1	0	0.5	1	0	0	0.333333	1	0	0.5	0	0.5	0.333333	0.4	0.666667	1	0.666667	0.333333	0.5
0,4,-2,0	0	0	0	0	0	0	0	0	0	1	0	0	0	0	0	0	0	0	0	0	0
0,-4,2,0	0	0	0	0	0	0	0	0	0	0	0	0	0	0	0	0.5	0	0	0	0	1
0,-4,-2,0	0	0	0	0	0.5	0	0	1	0.25	0.666667	0	0	1	1	0.3	0.75	0.666667	0	0.333333	0.142857	0.285714
0,4,2,1	0	0	0	0	0	0	0	0	0.666667	0	0.833333	0	0	0.5	0	0.1	0	0	0	0	0
0,4,2,-1	0	0	0	0	0	0	0	0	0	0	0	0	0.666667	0	0.111111	0	0.166667	0	0.111111	0.333333	0
0,-4,2,-1	1	0	0	0	0	0	0	0	0	0	0	0	0	0	0	0	0	0	0	0	0
0,-4,-2,1	0	0.333333	0	0	0	1	0	0	0.25	0	0	0	0	0	0	0	0	0.25	0	0	0
0,-4,-2,-1	0	0.333333	0	0	0	0	0	0	0	0	0	0	0	0	0	0	0	0.0833333	0	0	0
0,-4,-2,11	0	0	0	0	0	0	0	0	0	0	0	0	0	0	0.1	0	0	0	0	0	0
0,-4,-2,-12	0	0	0	0	0	0	0	0	0	0	0	0	0	0	0	0	0	0.0833333	0	0	0
0,4,2,2	0	0	0	0	0	0	0	0	0	0	0	0	0.333333	0	0.111111	0.1	0	0	0	0	0.214286
0,4,2,-2	0	0	0	0	0.5	0	0	0	0	0	0	0	0	0	0.222222	0	0	0	0	0.333333	0.0714286
0,4,-2,2	0	0	0	0	0	0	0	0	0	0	0	0	0	1	0	0	0	0	1	0	0
0,-4,2,2	0	0	0	0	0	0	0	0	0	0	0	0	0	0	0	0.5	0	0	0	0	0
0,-4,2,-2	0	0	0	0	0	0	0	0	0	0	0	0	0	0	0	0	0	0	0	1	0
0,-4,-2,2	0	0	0	0	0	0	0	0	0	0	0	0	0	0	0.4	0	0	0.0833333	0	0	0
0,-4,-2,-2	0	0	0.5	0	0	0	0	0	0	0	0	0	0	0	0	0.25	0	0	0	0.142857	0
0,4,2,3	0	0	0	0	0	0	0	0	0	0	0.166667	0	0	0	0	0	0	0	0.111111	0	0
0,4,2,-3	0	0.5	0	0	0	0	0	0	0	0	0	0	0	0	0.111111	0	0	0	0	0	0
0,4,-2,-3	0	0	0	0	0	0	0	0	0	0	0	0	0	0	1	0	0	0	0	0	0
0,-4,2,3	0	0	0	0	0	0	0	0	1	0	0	0	0	0	0	0	0	0	0	0	0
0,-4,2,-3	0	0	0	0	0	0	0	0	0	0	0	0	0	0	0	0	1	0	0	0	0
0,-4,-2,3	0	0	0	0	0	0	0	0	0	0	0	0	0	0	0.1	0	0	0.0833333	0	0	0.285714
0,4,2,4	0	0	0	0	0	0	0	1	0	0	0	0.5	0	0	0	0.3	0.166667	0	0.111111	0	0.0714286
0,4,2,-4	0	0	0	0	0	0	0	0	0	0	0	0	0	0	0	0.1	0	0	0	0	0
0,-4,-2,-4	1	0.333333	0.25	0	0.25	0	0	0	0	0.333333	0	1	0	0	0	0	0	0.25	0.333333	0.714286	0.142857
0,4,2,5	0	0	0	0	0	0	0	0	0	0	0	0	0	0	0	0	0	0	0	0	0.0714286
0,-4,-2,5	0	0	0	0	0	0	0	0	0	0	0	0	0	0	0.1	0	0	0.0833333	0	0	0
0,-4,-2,-5	0	0	0	1	0.25	0	0	0	0.25	0	0	0	0	0	0	0	0.333333	0	0.333333	0	0.142857
0,4,2,6	0	0	0	0	0	0	0	0	0	0	0	0	0	0	0	0	0	0	0	0	0.0714286
0,-4,-2,-6	0	0	0	0	0	0	0	0	0.25	0	0	0	0	0	0	0	0	0	0	0	0.142857
0,4,2,7	0	0	0	0	0	0	0	0	0	0	0	0	0	0	0.111111	0	0	0	0	0	0
0,-4,2,7	0	0	0	0	0	0	0	0	0	0	0	0	0	1	0	0	0	0	0	0	0
0,-4,-2,7	0	0	0	0	0	0	0	0	0	0	0	0	0	0	0	0	0	0.0833333	0	0	0
0,-4,-2,-7	0	0	0.25	0	0	0	0	0	0	0	0	0	0	0	0	0	0	0	0	0	0
0,-4,22,24	0	0	0	0	0	0	0	0	0	0	0	0	0	0	0	0	0	0	0	0	1
0,4,3,0	0	0	0	0	0	0	0	0	0	0	0	0	0	1	0	0	0.5	0	0	0	0
0,4,-3,0	0	1	0	0	0	0	0	0	0	0	0	0	0	0	0	0	0	0	0	1	0
0,-4,3,0	0	0	0	0.5	0	0	1	0	0	0	0	0	0	0	0	0	1	0.5	1	1	0
0,-4,-3,0	0.2	0	0	0.25	0.2	0.25	1	0	0	0	0	0	0	0	0	1	0	0	0	0	0
0,4,3,1	0.5	0	0	0	0	0.333333	0	0	0	0	1	0	0	0	0	0	0	0	0	0	0
0,4,3,-1	0	0	0	0	0.5	0	0	0	0.25	0	0	0	0	0	1	0	0	0	0	0	0
0,4,-3,1	0	0	0	0	0	0	0	0	0	1	0	0	0	0	0	0	0	0	0	0	0
0,-4,3,1	0	0	0	0.5	0	0	0	0	0	0	0	0	0	0	0	0	0	0	0	0	0
0,-4,-3,-1	0.2	0.25	0	0.5	0.2	0.25	0	0	0	0	0	0	0	0	0	0	0	0	0	0	0
0,-4,-3,14	0	0	0	0	0	0	0	0	0	0	0	0	0	0	0	0	0	0	0	0	1
0,-4,-3,-17	0.2	0	0	0	0	0	0	0	0	0	0	0	0	0	0	0	0	0	0	0	0
0,4,3,2	0	1	0	0	0.5	0.666667	0.666667	0	0.75	0	0	0	0	0	0	0	0.5	0	0	0	0
0,4,-3,-2	0	0	0	0	0	1	0	0	0	0	0	0	0	0	0	0	0	0	0	0	0
0,-4,3,2	0	0	0	0	0	1	0	0	0	0	0	0	0	1	0	0	0	0	0	0	0
0,-4,-3,2	0	0.25	0	0	0	0	0	0	0	0	0	0	0	0	0	0	0	0	0	0	0
0,-4,-3,-2	0	0	0	0	0	0	0	0	0	0	0	0	1	0	0	0	0	0	0	0	0
0,-4,-3,-27	0	0	0	0	0	0	0	0	0	0	0	0	0	0	0	0	0	0	0	0.5	0
0,-4,3,3	0	0	0	0	0	0	0	0	0	0	0	0	0	0	0	0	0	0.5	0	0	0
0,-4,-3,-3	0	0.25	0	0	0.2	0.25	0	0	0	0	0	0	0	0	0	0	0	0	0	0	0
0,4,3,4	0.5	0	0	0	0	0	0	0	0	0	0	0	0	0	0	0	0	0	0	0	0.5
0,-4,3,4	0	0	0	0	0	0	0	0	0	0	0	0	1	0	0	0	0	0	0	0	0
0,-4,3,-4	0	0	0	0	0	0	0	0	0	0.5	0	0	0	0	0	0	0	0	0	0	0
0,-4,-3,4	0	0	0	0.25	0	0	0	0	0	0	0	0	0	0	0	0	0	0	0	0	0
0,-4,-3,-4	0	0.25	0	0	0	0	0	0	0	1	0	0	0	0	0	0	0	0	0	0.5	0
0,4,3,-5	0	0	0	0	0	0	0	0	0	0	0	1	0	0	0	0	0	0	0	0	0
0,-4,3,5	0	0	0	0	0	0	0	0	0	0	0	0	0	0	0	1	0	0	0	0	0
0,-4,3,-5	0	0	0	0	0	0	0	0	0	0.5	0	0	0	0	0	0	0	0	0	0	0
0,-4,-3,5	0.2	0	0	0	0	0	0	0	0	0	0	0	0	0	0	0	0	0	0	0	0
0,4,3,6	0	0	0	0	0	0	0.333333	0	0	0	0	0	0	0	0	0	0	0	1	0	0.5
0,-4,3,6	0	1	0	0	0	0	0	0	0	0	0	0	0	0	0	0	0	0	0	0	0
0,-4,-3,-6	0.2	0	0	0	0	0	0	0	0	0	0	0	0	0	0	0	0	0	0	0	0
0,4,3,7	0	0	0	0	0	0	0	0	0	1	0	0	0	0	0	0	0	0	0	0	0
0,-4,-3,7	0	0	0	0	0.2	0	0	0	0	0	0	0	0	0	0	0	0	0	0	0	0
0,-4,-3,-7	0	0	0	0	0.2	0.25	0	0	0	0	0	0	0	0	0	0	0	0	0	0	0
0,4,4,0	1	0	0	0	0	0	0	0.333333	0	0	0	0	0	0	0	0	0	0	0	0	0
0,4,-4,0	0	0	0	0	0	0.5	0	0	0	0	0	0	0	0	0	0	0	0	0	0	0
0,-4,4,0	0	0	0	0	0	0.5	0	0	0	0	0	0	0	1	0	0	0	0	0	0	0
0,-4,-4,0	0	0	0.5	0	0	0	0	0	0.25	0	0	0	0	0.5	1	0	0.5	0	0	0	0
0,4,-4,-1	0	0	0	0	0	0.5	0	0	0	0	0	0	0	0	0	0	1	0	0	0	0
0,-4,4,1	0	0	0	0	0	0.5	0	0	0	0	0	0	0	0	0	0	0	0	0	0	0.333333
0,-4,4,-1	0	0	0	0	0	0	0	0	1	0	0	0	0	0	0	0	1	0	0	0	0
0,-4,-4,1	0	0	0	0	0	0	0	0	0	0	0	0	0	0	0	0	0	0	0	0	0.25
0,-4,-4,-1	0	0	0	0	0	0	0	0	0	0	0	0	0	0	0	1	0	0	0	0	0
0,-4,-4,12	0	0	0	0	0	0	0	0	0.25	0	0	0	0	0	0	0	0	0	0	0	0
0,4,4,2	0	0	0	1	0	0	0	0	0	0	0	0.666667	0	0	0	0.5	1	0	0	0	0.5
0,4,-4,-2	0	0	0	0	0	0	0	0	0	0	0	0	1	0	0	0	0	0	0	0	0
0,-4,4,2	0	0	0	0	0	0	0	0	0	0	0	0	0	0	0	0	0	0	0	0	0.666667
0,-4,-4,2	0	0	0	0	0	0	0	0	0	0	0	0	0	0	0	0	0	0	0	0	0.5
0,-4,-4,-2	0	0	0.5	0	0	0	0	0	0	0	0	0	0	0	0	0	0.5	0	0	0	0.25
0,4,4,-3	0	0	0	0	0	0	0	0.333333	0	0	0	0	0	0	0	0	0	0	0	0	0
0,-4,4,3	0	0	0	0	0	0	1	0	0	0	0	0	0	0	0	0	0	0	0	0	0
0,4,4,4	0	0	0	0	0	0	0	0	0	0	0	0	0	0	0	0.25	0	0	0	0	0
0,4,-4,4	0	0	0	0	0	0	0	0	0	0	0	0	0	1	0	0	0	0	0	0	0
0,-4,4,4	0	0	0	0	0	0	0	0	0	0	0	0	0	0	0	0	0	0	1	0	0
0,-4,4,-4	0	0	0	0	0	0	0	0	0	1	0	0	0	0	0	0	0	0	0	0	0
0,-4,-4,4	0	1	0	0	0	0	0	0	0	0	0	0	0	0	0	0	0	0	0	0	0
0,-4,-4,-4	0	0	0	0	0	0	0	1	0	0	0.5	0	0	0	0	0	0	0	0	0	0
0,4,4,5	0	0	1	0	0	0	0	0	0	0	0	0	0	0	0	0	0	1	0	0	0
0,-4,4,5	1	0	1	0	0	0	0	0	0	0	0	0	0	0	0	0	0	0	0	0	0
0,-4,-4,-6	0	0	0	0.333333	0	0	0	0	0.25	0	0	0	1	0	0	0	0	0	0	0	0
0,4,4,7	0	0	0	0	0	0	0	0	0	0	0	0.333333	0	0	0	0	0	0	0	0	0
0,-4,-4,-7	0	0	0	0	0	0	0	0	0.25	0	0	0	0	0	0	0	0	0	0	0	0
0,4,4,8	0	0	0	0	0	0	0	0	0	0	0	0	0	0	0	0	0	0	0	0	0.5
0,-4,-4,8	0	0	0	0	0	0	0	0	0	0	0.5	0	0	0	0	0	0	0	1	0	0
0,-4,-4,-8	1	0	0	0.666667	0	0	0	0	0	0	0	0	0	0.5	0	0	0	0	0	0	0
0,4,4,9	0	0	0	0	0	0	0	0.333333	0	0	0	0	0	0	0	0.25	0	0	0	0	0
0,4,-5,0	0	0	0	0	0	0	0	0	0	0	0	0	0	1	0	0	1	0	0	0	0
0,-4,5,0	0	0	0	0	0	0	0	0	0	0	0	0	0	1	0	0	0	0	0	0	0
0,-4,-5,0	0.166667	0	0	0	0	0	0	0	0	0	0	0	0	0	0	0	0	0	0	0	0.166667
0,4,5,1	1	0	0	0.333333	0	0	0	0	0	0	0	0	0.5	0	0	0	0	0	0	0	1
0,4,-5,1	0	0	0	0	0	0	0	0	0	0	0	0	1	0	0	0	0	0	0	0	0
0,-4,5,1	0	0	0	0	0.5	0	0	0	0	0	0	0	0	0	0	0	0	0	0	0	0.5
0,-4,-5,1	0	0	0	0	0	0	0	0	0	0	0	0	0	0.1	0	0	0	0	0	0	0
0,-4,-5,-1	0	0	0	0	0	0	0	0	0	0	0	0	0	0.1	0	0	0	0	0	0	0
0,4,5,10	0	0	0	0	0	0	0	0	0	0	0	0	0	0	0	0	1	0	0	0	0
0,4,5,11	0	0	0	0	0	0	0	0	0	0	0	0	0	0	0	0	0	0	0	0.333333	0
0,-4,-5,-13	0	0	0.25	0	0	0	0	0	0	0	0	0	0	0	0	0	0	0	0	0	0
0,4,5,2	0	0	0	0.333333	1	0	0	0	0	0	0	0	0	0	0	0	0	0	0	0	0
0,-4,5,2	0	0	0	0	0	1	0	0	0	0	0	0	0	0	0	0	0	1	1	0	0
0,-4,-5,-2	0	0.111111	0.25	0.5	0	0	0	0	0	0	0	0	0	0.1	0.5	0.5	0	0	0	0	0.333333
0,4,5,3	0	0	0	0.333333	0	0	0	0	0	0	0	0	0	0	0	0	0	0	0	0	0
0,-4,5,3	0	0	0	0	0	0	0	0	0	0	0	0	0	0	1	0	0	0	0	0	0.5
0,-4,-5,3	0	0	0	0	0	0	0.333333	0	0	0	0	0	0	0	0	0	0	0	0	0	0
0,4,5,4	0	0.333333	0	0	0	0	0	0	0	0	0	0	0	0	0	0	0	0	0	0	0
0,-4,5,4	0	0	0	0	0.5	0	0	0	0	0	0	0	0	0	0	0	0	0	0	0	0
0,-4,5,-4	0	0	0	0	0	0	0	0	0	0	0	0	0	0	0	0	0	0	0	1	0
0,-4,-5,-4	0.166667	0.111111	0.5	0	0	0	0	0	0	0	0	0	0.833333	0	0	0	0	0	0	0	0
0,4,5,5	0	0.333333	0.5	0	0	0	0	0	0	0	0	0	0.25	0	0	0	0	0	0	0.333333	0
0,-4,-5,5	0	0	0	0	0	0	0	0	0	0	0	0	0	0	0.5	0	0	0	0	0	0
0,-4,-5,-5	0	0	0	0	0.25	0	0	0	0	0	0	0	0	0	0	0	0	0	0	0	0
0,4,5,6	0	0	0	0	0	1	0	0	0	0	1	0	0.25	0	0	0	0	0	0	0	0
0,-4,5,-6	0	0	0	0	0	0	0	0	1	0	0	0	0	0	0	0	0	0	0	0	0
0,-4,-5,6	0	0	0	0	0	0.111111	0	0	0	0	0	0	0	0.1	0	0	0	0	0	0	0
0,-4,-5,-6	0	0	0	0	0.25	0.444444	0.333333	0	0	0	0	0	0.166667	0.4	0	0	0	0	0	0	0
0,4,5,7	0	0	0.5	0	0	0	0.75	0	0	0	0	0	0	0	1	0	0	0	0	0.333333	0
0,-4,-5,-7	0.666667	0.777778	0	0.5	0.5	0.444444	0.333333	1	0	1	1	0	0	0.1	0	0.5	0	0	0	1	0.5
0,4,5,8	0	0.333333	0	0	0	0	0	0	0	1	0	0	0	0	0	0	0	0	1	0	0
0,4,5,9	0	0	0	0	0	0	0.25	0	0	0	0	0	0	0	0	0	0	0	0	0	0
0,-4,-5,-9	0	0	0	0	0	0	0	0	0	0	0	0	0	0.1	0	0	0	0	0	0	0
0,-4,6,1	0	0	0	0	0	0.5	0	0	0	0	0	0	0	0	0	0	0	0	0	0	0
0,-4,-6,1	0	0	0	0	0	0	0	1	0	0	0	0	0	0	0	0	0	0	0	0	0
0,-4,-6,-1	0	0	0	0	0	0	0	0	0	0	0	0	0	1	0	0	0	0	1	0	0
0,-4,-6,-11	0	0	0	0	0	0	0	0	0	0	0	0	0	0	0	0	0	0	0	0	0.333333
0,4,6,2	0	0	0	0	0	0	0	0	0	0	0	0	1	0	0	0	0	0	0	0	0.333333
0,-4,-6,-2	0	0	0	0	0	0	0	0	0	0	0	0	0	0	0	0.5	0.5	0	0	0	0
0,4,6,3	0	0	0	0	0	0	0	0	0	0	0	0	0	0	0	0	0	0	1	0	0
0,-4,6,3	0	0	0	0	0	0	0	0	0	0	0	0	0	0	0	0	0	0	0	0	1
0,-4,-6,3	0	0	0	0	0	0	0	0	0	0	1	0	0	0	0	0	0	0	0	0	0
0,4,6,4	0	0	1	0	0	0	0	0	0	0	0	0	0	0	0	0.166667	0.5	0	0	0	0
0,-4,6,4	0	0	0	0	0	0.5	0	0	0	0	0	0	0	0	0	0	0	0	0	0	0
0,-4,6,-4	0	0	0	0	0	0	0	0	0	0	0	0	0	0	0	0	0	0	1	0	0
0,-4,-6,-4	0	0	0	0	0	0	0	0	0.5	0	0	0	0	0	0.5	0.25	0	0	0	0.6	0.333333
0,4,6,5	0	0	0	0	0	0	0	0	0	0	1	0	0	0	0	0	0	0	0	0	0
0,-4,-6,5	0	0	0	0	0	0	0	0	0	0	0	0	0	0	0.25	0	0	0	0	0	0
0,-4,-6,-5	0	0	1	0	0	0	1	0	0	0	0	0	0	0	0	0	0	0	0	0	0
0,4,6,6	0	0	0	0	0	0	0	0	0	0	0	0	0	0	0	0.5	0	0	0	0	0
0,-4,6,6	0	0	0	0	0	0	0	0	0	0	0	0	0	1	0	0	0	0	0	0	0
0,-4,-6,6	0	0	0	0	0	0	0	0	0	0	0	0	0	0	0	0	0	0	0	0.2	0
0,-4,-6,-6	0	0	0	0	0	0	0	0	0.5	0	0	0	0	0	0	0	0	0	0	0	0
0,4,6,7	0	0	0	0	0	0	0	0	0	0	0	0	0	1	1	0	0	0	0	0	0.333333
0,-4,-6,-7	0	0	0	0	0	0	0	0	0	0	0	0	0	0	0.25	0	0	0	0	0	0
0,4,6,8	0	0	0	0	0	0	0	0	0	0	0	0	0	0	0	0.166667	0	0	0	1	0.333333
0,-4,-6,-8	0	0	0	0	0	0	0	0	0	0	0	0	0	0	0	0.25	0.5	0	0	0.2	0.333333
0,4,6,9	0	0	0	0	0	0	0	0	0	0	0	0	0	0	0	0.166667	0.5	0	0	0	0
0,-4,-6,-9	0	0	0	0	0	0	0	0	0	1	0	0	0	0	0	0	0	0	0	0	0
0,4,7,0	0	0	0	0	0	0	0	0	0	0	0	0	0	0	0	0	0.4	0	0	0	0
0,-4,-7,0	0	0.0625	0.0666667	0	0.1	0	0	0	1	0	0	0	0.0769231	0.2	0.166667	0	0.222222	0.2	0	0.142857	0.166667
0,4,7,1	0	0.142857	0	0	0	0	0	0	0	0	0	0	0	0	0	0	0	0	0	0	0
0,4,7,-1	0	0	0	0	0	0	0	0	0.142857	0	0	0	0	0.2	0	0	0	0	0	0	0
0,-4,-7,1	0	0.0625	0	0	0	0.0769231	0	0	0	0	0	0	0	0	0	0	0.111111	0	0	0	0
0,-4,-7,-1	0	0.0625	0.0666667	0	0	0	0	0	0	0	0	0	0.0769231	0	0	0	0	0	0	0	0
0,4,7,10	0.117647	0.142857	0.0555556	0	0.153846	0	0.105263	0	0.142857	0	0	0	0.0769231	0	0.5	0	0	0	0	0	0
0,-4,-7,10	0	0	0	0	0.05	0	0	0	0	0	0	0	0.0769231	0	0	0	0	0	0	0	0
0,-4,-7,-10	0.142857	0.0625	0.0666667	0	0	0	0	0	0	0	0	0	0	0.2	0.166667	0	0.111111	0.1	0.25	0.142857	0
0,4,7,11	0.176471	0.285714	0.444444	0.625	0.384615	0.272727	0.263158	0	0.142857	0	0	0.25	0.384615	0	0	0.5	0	0	0	0.6	0
0,-4,-7,-11	0.285714	0.1875	0.0666667	0	0.25	0.0769231	0	0	0	0	0	0.2	0.461538	0	0	0	0.111111	0	0	0	0
0,4,7,12	0	0	0	0	0	0	0.105263	0	0	0	0.25	0.25	0	0.2	0	0	0	0	0.5	0	0
0,-4,-7,-12	0	0.0625	0.266667	0	0	0	0	0	0	0.333333	0.3	0.2	0.153846	0.2	0	0	0	0.1	0.25	0	0
0,4,7,14	0	0.142857	0	0	0	0	0	0	0	0	0	0	0	0	0	0	0	0	0	0	0
0,-4,-7,-17	0	0	0	0.333333	0	0	0	0	0	0	0	0	0	0	0	0	0	0	0	0	0
0,4,7,2	0	0	0	0	0	0	0	0	0	0	0.5	0	0	0	0	0	0.2	0	0	0	0.2
0,-4,-7,2	0.142857	0	0	0	0.05	0.0769231	0	0	0	0	0	0	0	0	0	0	0.111111	0	0	0	0
0,-4,-7,-2	0.142857	0.125	0.0666667	0	0.1	0.0769231	0.428571	0	0	0.333333	0.2	0	0	0	0.166667	1	0.111111	0.3	0.25	0	0.333333
0,-4,-7,-25	0	0	0	0	0	0	0	0	0	0	0	0	0	0	0	0	0	0	0	0.142857	0
0,4,7,3	0	0	0	0.125	0.0769231	0.0909091	0.0526316	0	0	0	0	0	0	0	0	0	0	0	0	0	0
0,-4,-7,3	0	0	0	0	0.1	0.230769	0	0	0	0	0	0	0.0769231	0	0	0	0	0	0	0	0
0,4,7,4	0.294118	0.142857	0.388889	0	0.0769231	0.545455	0.105263	1	0.428571	0	0.25	0.25	0	0.2	0	0	0.4	0.5	0.5	0	0
0,-4,7,4	1	0	0	0	0	0	0	0	0	0	0	0	0	0	0	0	0	0	0	0	0
0,-4,-7,-4	0	0	0.266667	0	0.1	0	0	0	0	0	0.4	0.2	0	0	0.0833333	0	0	0	0	0.285714	0
0,4,7,5	0.352941	0	0.0555556	0	0.0769231	0	0.157895	0	0	0	0	0	0	0	0	0	0	0.5	0	0	0.2
0,-4,7,5	0	0	0	0	0	1	0	0	0	0	0	0	0	0	0	0	0	0	0	0	0
0,-4,-7,-5	0.142857	0.0625	0.0666667	0	0.05	0	0.428571	0	0	0	0	0.2	0	0	0.0833333	0	0.111111	0	0	0	0.166667
0,4,7,6	0.0588235	0	0	0.125	0.153846	0	0	0	0.142857	0	0	0	0.0769231	0	0	0.5	0	0	0	0.2	0.2
0,4,-7,-6	0	0	0	0	1	0	0	0	0	0	0	0	0	0	0	0	0	0	0	0	0
0,-4,-7,6	0	0.0625	0	0	0	0	0	0	0	0	0	0	0	0	0	0	0	0	0	0	0
[truncated: 804 more rows]

## Sheet: 4th-order
	Evans_No1	Evans_No2	Evans_No3	Evans_No4	Evans_No5	Evans_No6	Evans_No7	Hancock_No1	Hancock_No2	Hancock_No3	Hancock_No4	Hancock_No5	Hancock_No6	Hancock_No7	Tyner_No1	Tyner_No2	Tyner_No3	Tyner_No4	Tyner_No5	Tyner_No6	Tyner_No7
0,0,0,0,0	0	0	0	0	0	0	0	0	0	0.75	0.545455	0.333333	0.333333	0	0	0.444444	0.2	0	0.894737	0	0
0,0,0,0,1	0	0	0	0	0	0	0	0	0	0	0.0909091	0	0.333333	0	0	0	0	0	0	0	0
0,0,0,0,-1	0	0	0	0	0	0	0	0	0	0	0	0	0	0	0	0	0.2	0	0	0	0
0,0,0,0,-11	0	0	0	0	0	0	0	0	0	0	0	0	0	0	0	0	0.2	0	0	0	0
0,0,0,0,2	0	0	0	0	0	0	0	0	0	0.25	0	0	0	0	0	0.111111	0	0	0	0	0
0,0,0,0,-2	0	0	0	0	0	0	0	0	0	0	0.272727	0	0	0	0	0.222222	0.2	0	0	0	0
0,0,0,0,-20	0	0	0	0	0	0	0	0	0	0	0	0	0	0	0	0	0	0	0.0526316	0	0
0,0,0,0,3	0	0	0	0	0	0	0	0	0	0	0	0	0	0	1	0.222222	0	0	0	0	0
0,0,0,0,-3	0	0	0	0	0	0	0	0	0	0	0	0	0	0	0	0	0	0	0	0	0.5
0,0,0,0,-4	0	0	0	0	0	0	0	1	0	0	0	0	0	0	0	0	0	1	0	0	0.5
0,0,0,0,5	0	0	0	0	0	0	0	0	0	0	0.0909091	0.333333	0	0	0	0	0	0	0	0	0
0,0,0,0,-5	0	0	0	0	0	0	0	0	0	0	0	0	0	0	0	0	0	0	0.0526316	0	0
0,0,0,0,-6	0	0	0	0	0	0	0	0	0	0	0	0	0	0	0	0	0.2	0	0	0	0
0,0,0,0,7	0	0	0	0	0	0	0	0	0	0	0	0	0.166667	0	0	0	0	0	0	0	0
0,0,0,0,-7	0	0	0	0	0	0	0	0	0	0	0	0.333333	0	0	0	0	0	0	0	0	0
0,0,0,0,9	0	0	0	0	0	0	0	0	0	0	0	0	0.166667	0	0	0	0	0	0	0	0
0,0,0,1,0	0	0	0	0	0	0	0	0	0	0	0	0	0.5	0	0	0	0	0	0	0	0.5
0,0,0,1,1	0	0	0	0	0	0	0	0	0	0	0.5	0	0	0	0	0	0	0	0	0	0.5
0,0,0,1,-1	0	0	0	0	0	0	0	0	0	0	0.5	0	0	0	0	0	0	0	0	0	0
0,0,0,-1,2	0	0	0	0	0	0	0	0	0	0	0	0	0	0	0	0	1	0	0	0	0
0,0,0,1,3	0	0	0	0	0	0	0	0	0	0	0	0	0.5	0	0	0	0	0	0	0	0
0,0,0,-1,-4	0	0	0	0	0	0	0	0	0	0	0	0	0	0	0	0	0	0	0	1	0
0,0,0,1,-7	0	0	0	0	0	0	0	0	1	0	0	0	0	0	0	0	0	0	0	0	0
0,0,0,-11,0	0	0	0	0	0	0	0	0	0	0	0	0	0	1	0	0	0	0	0	0	0
0,0,0,-11,-13	0	0	0	0	0	0	0	0	0	0	0	0	0	0	0	0	1	0	0	0	0
0,0,0,2,0	0	1	0	0	0	0	0	0	0	1	0	0	0	0	0	0.4	0	0	0	0	0
0,0,0,-2,0	0	0	0	0	0	0	0	0	0	0	1	0	0	0	0	0.6	0	0	0	0	0
0,0,0,2,-1	0	0	0	0	0	0	0	0	0	0	0	0	0	0	0	0.2	0	0	0	0	0
0,0,0,2,2	0	0	0	0	0	0	0	0	0	0	0	0	0	0	0	0.2	0	0	0	0	0
0,0,0,2,-2	0	0	0	0	0	0	0	0	0	0	0	0	0	0	0	0.2	0	0	0	0	0
0,0,0,-2,-2	0	0	0	0	0	0	0	0	1	0	0	0	0	0	0	0.4	0	0	0	0	0
0,0,0,-2,-3	0	0	0	0	0	0	0	0	0	0	0	0	0	0	0	0	0.5	0	0	0	0
0,0,0,2,4	0	0	1	0	0	0	0	0	0	0	0	0	0	0	0	0	0	0	0	0	0
0,0,0,-2,-4	0	0	0	0	0	0	0	0	0	0	0	0	0	0	0	0	0.5	1	0	0	0
0,0,0,2,-5	0	0	0	0	0	0	0	0	1	0	0	0	0	0	0	0	0	0	0	0	0
0,0,0,-2,5	0	1	0	0	0	0	0	0	0	0	0	0	0	0	0	0	0	0	0	0	0
0,0,0,-20,-15	0	0	0	0	0	0	0	0	0	0	0	0	0	0	0	0	0	0	1	0	0
0,0,0,3,0	0	0	0	0	0	0	0	0	0	0	0	0	0	0	0	0.5	0	0	0	0	0
0,0,0,-3,0	0	0	0	0	0	0	0	1	0	0	0	0	0	0	0	0	0	0	0	0	1
0,0,0,3,1	0	0	0	0	0	0	0	0	0	0	0	0	1	0	0	0	0	0	0	0	0
0,0,0,-3,2	0	0	0	0	0	0	0	0	0	0	0	0	0	0	0	0	1	0	0	0	0
0,0,0,3,3	0	0	0	0	0	0	0	0	0	0	0	0	0	0	0	0.25	0	0	0	0	0
0,0,0,-3,-3	0	0	0	0	0	0	0	0	0	0	1	0	0	0	0	0	0	0	0	0	0
0,0,0,3,5	0	0	0	0	0	0	0	0	0	0	0	0	0	0	1	0	0	0	0	0	0
0,0,0,-3,-5	0	0	0	0	0	0	0	0	0	0	0	0	0	0	0	1	0	0	0	0	0
0,0,0,-3,-6	0	0	0	0	0	0	0	0	0	0	0	0	0	1	0	0	0	0	0	0	0
0,0,0,3,7	0	1	0	0	0	0	0	0	0	0	0	0	0	0	0	0	0	0	0	0	0
0,0,0,3,-9	0	0	0	0	0	0	0	0	0	0	0	0	0	0	0	0.25	0	0	0	0	0
0,0,0,-4,0	0	0	0	0	0	0	0	1	0	0	0	0	0	0	0	0	0	0	0	0	0
0,0,0,-4,-16	0	0	0	0	0	0	0	0	0	1	0	0	0	0	0	0	0	0	0	0	0
0,0,0,-4,3	0	0	0	0	0	0	0	0	0	0	0	0	0	0	0	0	0	1	0	0	0
0,0,0,-4,-3	0	0	0	0	0	0	0	0	0	0	0	0	0	0	0	0	0	0	0	0	1
0,0,0,4,4	0	0	0	0	0	0	0	1	0	0	0	0	0	0	0	0	0	0	0	0	0
0,0,0,-4,-7	0	0	0	0	0	0	0	0	0	0	1	0	0	0	0	0	0	0	0	0	0
0,0,0,5,0	0	0	0	0	0	0	0	1	0	0	0	0	0	0	0	0	0	0	0	0	0
0,0,0,-5,0	0	0	0	0	0	0	0	0	0	0	0	0	0	0	0	0	0	0	1	0	0
0,0,0,5,10	0	0	0	0	0	0	0	0	0	0	1	0	0	0	0	0	0	0	0	0	0
0,0,0,5,3	0	0	0	0	0	0	0	0	0	0	0	1	0	0	0	0	0	0	0	0	0
0,0,0,5,5	0	0	0	0	0	0	0	0	0	0	0	0	0	0	0	1	1	0	0	0	0
0,0,0,-6,-2	0	0	0	0	0	0	0	0	0	0	0	0	0	0	0	0	1	0	0	0	0
0,0,0,-6,4	0	0	0	0	0	0	0	0	0	0	0	0	0	0	0	0	0	0	0	0	1
0,0,0,-6,-6	0	0	0	0	0	0	0	0	0	0	0	0	0	0	0	1	0	0	0	0	0
0,0,0,-7,-10	0	0	0	0	0	0	0	0	0	0	0	1	0	0	0	0	0	0	0	0	0
0,0,0,7,3	0	1	0	0	0	0	0	0	0	0	0	0	0	0	0	0	0	0	0	0	0
0,0,0,7,5	0	0	0	0	0	0	0	0	0	1	0	0	1	0	0	0	0	0	0	0	0
0,0,0,7,7	0	0	0	0	0	0	0	0	0	0	0	0	0	0	0	1	0	0	0	0	0
0,0,0,9,0	0	0	0	0	0	0	0	0	0	0	0	1	0	0	0	0	0	0	0	0	0
0,0,0,-9,0	0	0	0	0	0	0	0	0	0	0	0	0	0	0	0	0	0	0	0	0	1
0,0,0,9,5	0	0	0	0	0	0	0	0	0	0	0	0	1	0	0	0	0	0	0	0	0
0,0,0,-9,-6	0	0	0	0	0	0	0	0	0	0	0	0	0	0	0	0	1	0	0	0	0
0,0,0,-9,-7	0	0	0	0	0	0	0	1	0	0	0	0	0	0	0	0	0	0	0	0	0
0,0,1,0,0	0	0.666667	0	0	0	0	0	0	0	0	0.2	0	0.5	0	0	0	0	0	0	0	1
0,0,1,0,-1	0	0	0	0	0	0	0	0	0	0	0.4	0	0	0	0	0	0	0	0	0	0
0,0,-1,0,1	0	0	0	0	0	0	0	0	0	0	0	0	0	0.8	0	0	0	0	0	0	0
0,0,-1,0,-1	0	0	0	0	0	0	0	0	1	0	1	0	0	0	0	0	0	0	0	0	0
0,0,1,0,-2	0	0.333333	1	0	0	0	0	0	0	0	0.2	0	0	0	0	0	0	0	0	0	0
0,0,-1,0,2	0	0	0	0	0	1	0	0	0	0	0	0	0	0.2	0	0	0	0	0	0	0
0,0,1,0,3	0	0	0	0	0	0	0	0	0	0	0.2	0	0	0	0	0	0	0	0	0	0
0,0,1,0,-4	0	0	0	0	0	0	0	0	0	0	0	0	0.5	0	0	0	0	1	0	0	0
0,0,-1,0,-8	0	0	1	0	0	0	0	0	0	0	0	0	0	0	0	0	0	0	0	0	0
0,0,1,1,0	0	0	1	0	0	0	0	0	0	0	0	0	0	1	0	0	0	0	0	0	0
0,0,1,-1,0	0	0	1	0	0	0	0	0	0	0	0	0	0	0	0	0	0	0	0	0	0
0,0,1,1,1	0	0	0	0	0	0	0	0	0	0	0.5	0	0	0	0	0	0	0	0	0	1
0,0,1,-1,-1	0	0	0	0	0	0	0	0	0	0	1	0	0	0	0	0	0	0	0	0	0
0,0,-1,1,-1	0	0	0	0	0	0	0	0	0	0	1	0	0	0	0	0	0	0	0	0	0
0,0,-1,-1,-1	0	0	0	0	0	0	0	0	0	0	0	0	0	0	0	1	0	0	0	0	0
0,0,1,1,-2	0	0.5	0	0	0	0	0	0	0	0	0	0	0	0	0	0	0	0	0	0	0
0,0,-1,-1,2	0	0	0	0	0	0	0	0	0	0	0	0	0	0	0	0	0	0	1	0	0
0,0,-1,-1,-2	0	0	0	0	0	0	0	0	0	0	0.666667	0	0	0	0	0	0	0	0	0	0
0,0,1,1,3	0	0.5	0	0	0	0	0	0	1	0	0	0	0	0	0	1	0	1	0	0	0
0,0,1,-1,-3	0	0	0	0	0	0	0	0	1	0	0	0	0	0	0	0	0	0	0	0	0
0,0,-1,-1,-3	0	0	0	0	0	0	0	0	1	0	0.333333	0	0	0	0	0	0	0	0	0	0
0,0,1,1,4	0	0	0	0	0	0	0	0	0	0	0.5	0	0	0	0	0	0	0	0	0	0
0,0,-1,-10,-6	0	0	0	0	0	0	0	0	0	0	0	0	0	0	0	0	0	0	0	0	1
0,0,1,2,1	0	0	0	0	0	0	0	0	0	0	0	0	0	1	0	0	0	0	0	0	0
0,0,-1,2,1	0	0	0	0	0	0	0	0	0	0	0	0	0	0	0	0	0	0	0	0	1
0,0,-1,-2,12	0	0	0	0	1	0	0	0	0	0	0	0	0	0	0	0	0	0	0	0	0
0,0,1,2,-2	0	0	1	0	0	0	0	0	0	0	0	0	0	0	0	0	0	0	0	0	0
0,0,-1,2,2	0	0	0	0	0	0	0	0	0	0	0	0	0	0	0	0	1	0	0	0	0
0,0,1,2,3	0	0	0	1	0	0	0	0	0	0	1	0	0	0	0	0	0	0	0	0	1
0,0,-1,2,-3	0	0	0	0	0	0	0	0	1	0	0	0	0	0	0	0	0	0	0	0	0
0,0,-1,-2,-3	0	0	0	0	0	0	0	0	0	0	0	0	0	1	0	0	0	0	0	0	0
0,0,1,-2,-4	0	0	0	1	0	0	0	0	0	0	0	0	0	0	0	0	0	0	0	0	0
0,0,1,2,5	0	0	0	0	0	0	0	0	0	0	0	0	0	0	0	0	0	1	0	0	0
0,0,1,-2,-7	0	0	1	0	0	0	0	0	0	0	0	0	0	0	0	0	0	0	0	0	0
0,0,1,-2,-8	0	0	0	0	0	0	0	0	0	0	0	0	0	0	0	1	0	0	0	0	0
0,0,-1,-3,0	0	0	0	0	0	0	0	0	0	0	0	0.5	0	0	0	0	0	0	0	0	0
0,0,1,3,1	0	1	0	0	0	0	0	0	0	0	0	0	1	0	0	0	0	0	0	0	0
0,0,1,-3,1	0	0	0	0	0	0	0	0	0	0	0	0	1	0	0	0	0	0	0	0	0
0,0,-1,-3,-1	0	0	0	0	0	0	0	0	0	0	0	0.5	0	0	0	0	0	0	0	0	0
0,0,1,3,-2	0	0	0	0	0	0	0	0	0	0	0.25	0	0	0	0	0	0	0	0	0	0
0,0,1,-3,-2	0	0	0	0	1	0	0	0	0	0	0	0	0	0	0	0	0	0	0	0	0
0,0,-1,-3,2	0	0	0	0	0	0	0	0	0	0	0	0	0	0	0	1	0	0	0	0	0
0,0,1,3,3	0	0	0	0	0	0	0	0	0	0	0.25	0	0	0	0	0	0	0	0	0	0
0,0,1,3,4	0	0	0	0	0	0	0	0	0	0	0.25	0	0	0	0	0	0	0	0	0	0
0,0,1,3,5	0	0	0	0	0	0	0	0	1	0	0	0	0	0	0	0	0	0	0	0	0
0,0,1,3,6	0	0	0	0	0	0	0	0	0	0	0.25	0	0	0	0	0	0	0	0	0	0
0,0,1,3,8	0	0	0	0	0	0	0	0	0	0	0	0	0	1	0	0	0	0	0	0	0
0,0,-1,-4,-3	0	0	0	0	0	0	0	0	0	0	0	0	0	0	0	0	0	0	0	1	0
0,0,1,4,4	0	0	0	0	0	0	0	0	0	0	1	0	0	0	0	0	0	0	0	0	0
0,0,1,-4,-4	0	0	0	1	0	0	0	0	0	0	0	0	0	0	0	0	0	0	0	0	0
0,0,1,4,5	0	1	0	0	0	0	0	0	0	0	0	0	0	0	0	0	0	0	0	0	0
0,0,1,4,7	0	0	0	0	0	0	0	0	0	0	0	0	0	0	0	0	1	0	0	0	0
0,0,1,4,8	0	0	0	0	0	1	0	0	0	0	0	0	0	0	0	0	0	0	0	0	0
0,0,1,5,7	0	0	0	0	0	0	0	0	0	0	0	0	0	0	0	1	0	0	0	0	0
0,0,1,5,8	0	0	0	0	1	0	0	0	0	0	0	0	0	0	0	0	0	0	0	1	0
0,0,-1,-5,-8	0	1	0	0	0	0	0	0	0	0	0	0	0	0	0	0	0	0	0	0	0
0,0,1,5,9	0	0	0	0	0	0	1	0	0	0	0	0	0	0	0	0	0	0	0	0	0
0,0,-1,-7,-2	0	0	0	0	0	0	0	0	0	0	0	0	0	0	0	0	0	0	1	0	0
0,0,1,-7,-7	0	0	0	0	0	0	0	0	1	0	0	0	0	0	0	0	0	0	0	0	0
0,0,-10,0,0	0	0	0	0	0	0	0	0	0	0	0	0	0	0	0	1	0	0	0	0	0
0,0,10,12,10	0	0	0	0	0	0	0	1	0	0	0	0	0	0	0	0	0	0	0	0	0
0,0,10,4,22	0	0	0	0	0	0	0	0	0	1	0	0	0	0	0	0	0	0	0	0	0
0,0,-11,0,0	0	0	0	0	0	0	0	0	0	0	0	0	0	0.5	0	0	0	0	0	0	0
0,0,-11,0,1	0	0	0	0	0	0	0	0	0	0	0	0	0	0.5	0	0	0	0	0	0	0
0,0,-11,-13,-15	0	0	0	0	0	0	0	0	0	0	0	0	0	0	0	0	1	0	0	0	0
0,0,-11,-7,-5	0	0	0	0	0	0	0	0	0	0	0	0	0	0	0	1	0	0	0	0	0
0,0,-12,-12,-10	0	0	0	0	0	0	0	0	0	0	0	0	0	0	0	0	1	0	0	0	0
0,0,12,12,11	0	0	0	0	0	0	0	0	0	0	0	0	0	0	0	0	0	0	1	0	1
0,0,-12,-14,-16	0	0	0	0	0	0	0	0	0	1	0	0	0	0	0	0	0	0	0	0	0
0,0,-12,-14,-19	0	0	0	0	0	0	0	0	0	0	0	0	0	1	0	0	0	0	0	0	0
0,0,-12,-3,-15	0	0	0	0	0	0	0	0	0	0	0	0	0	0	0	0	0	0	0	1	0
0,0,-12,-7,-6	0	0	0	0	0	0	0	1	0	0	0	0	0	0	0	0	0	0	0	0	0
0,0,12,8,5	0	0	0	0	0	1	0	0	0	0	0	0	0	0	0	0	0	0	0	0	0
0,0,12,9,4	0	0	0	0	0	0	0	0	0	0	1	0	0	0	0	0	0	0	0	0	0
0,0,13,3,8	0	1	0	0	0	0	0	0	0	0	0	0	0	0	0	0	0	0	0	0	0
0,0,-14,-10,-12	0	0	0	0	0	0	0	0	0	0	0	0	0	0	0	1	0	0	0	0	0
0,0,14,12,10	0	0	0	0	0	0	0	0	0	0	0	0	0	0	0	0	1	0	0	0	0
0,0,15,14,7	0	0	0	0	0	0	0	0	1	0	0	0	0	0	0	0	0	0	0	0	0
0,0,-16,-11,-8	0	0	0	0	0	0	0	0	1	0	0	0	0	0	0	0	0	0	0	0	0
0,0,16,15,10	0	0	0	0	0	0	0	0	1	0	0	0	0	0	0	0	0	0	0	0	0
0,0,-17,-15,-13	0	0	0	0	0	0	0	0	0	0	0	0	0	0	0	0	0	0	0	0	1
0,0,17,17,17	0	0	0	0	0	0	0	0	0	0	0	0	0	0	1	0	0	0	0	0	0
0,0,2,0,0	0	0	0	0	0	0	0	0	0	0	0	0	0	0	0	0.4	0	0	0	0	0
0,0,-2,0,0	0	0	0	0	0	0	0	0	0	0	0.25	0	0	0	0	0	0	0	0	0	0
0,0,2,0,-1	0	0.5	0	0	0	0	0	0	0	0	0	0	0	0	0	0	0	0	0	0	0
0,0,-2,0,1	0	0	0	0	0	0	0	0	0	0	0.125	0	0	0	0	0.6	0	0	0	1	0
0,0,-2,0,12	0	0	0	0	0	0	0	0	0	0	0.125	0	0	0	0	0	0	0	0	0	0
0,0,2,0,-2	0	0.5	0	0	0	0	0	0	0	0.5	0	0	0	0	0	0.4	0	0	0	0	0
0,0,-2,0,2	0	1	0	0	0	0	0	0	0	0	0.25	0	0	0.5	0	0.4	0	0	0	0	0
0,0,-2,0,-2	0	0	0	0	0	0	0	0	1	0	0.125	0	1	0.5	0	0	0	0	0	0	0
0,0,2,0,-3	0	0	0	0	0	0	0	0	0	0.5	0	0	0	0	0	0	0	0	0	0	0
0,0,-2,0,4	0	0	0	0	0	0	0	0	0	0	0.125	0	0	0	0	0	0	0	0	0	0
0,0,2,0,-7	0	0	0	0	0	0	0	0	0	0	0	0	0	0	0	0.2	0	0	0	0	0
0,0,-2,0,-7	0	0	0	0	0	0	0	0	0	0	0	0	0	0	0	0	1	0	0	0	0
0,0,2,-1,1	0	0	0	0	0	0	0	0	0	0	0	0	0	0	0	0	0	0	0	0	1
0,0,-2,1,-1	0	0	0	0	0	1	0	0	0	0	0	0	0	0	0	0	0	0	0	0	0
0,0,-2,1,-2	0	0	0	1	0	0	0	0	0	0	0	0	0	0	0	0	0	0	0	0	0
0,0,-2,-1,2	0	0	0	1	0	0	0	0	0	0	0	0	0	0	0	0	0	0	0	0	0
0,0,-2,-1,-2	0	0	0	0	0	0	0	1	0	0	0	0	0	0	0	0	0	0	0	0	0
0,0,2,-1,-3	0	0	0	0	0	0	0	0	0	0	0	0	0	0	0	0	1	0	0	0	0
0,0,-2,1,3	0	0	0	0	0	0	0	0	0	0	0	0	0	0	0	0	0	1	0	0	0
0,0,2,-1,4	0	0	0	0	0	0	0	0	0	0	0	0	0	0	0	0	0	0	1	0	0
0,0,2,-1,-5	0	0	0	0	0	0	0	0	0	0	0	0	0	0	0	1	0	0	0	0	0
0,0,2,-10,4	0	0	0	0	0	0	0	0	0	0	0	0	0	0	0	0	0	0	1	0	0
0,0,2,-12,-15	0	0	0	0	0	0	0	0	0	0	0	0	0	0	0	1	0	0	0	0	0
0,0,-2,-14,-7	0	0	0	0	0	0	0	0	0	0	0	0	0	0	0	0	0	0	1	0	0
0,0,-2,-17,-14	0	0	0	0	0	0	0	0	0	0	0	0	0	0	0	0	0	0	0	0	1
0,0,2,2,0	0	0	0	0	0	0	0	0	0	0	0	0	0	0	0	0	0	0	1	0	0
0,0,2,-2,0	0	0	0	0	0	0	0	0	0	0	0	0	0	0	0	0.5	0	0	0	0	0
0,0,-2,2,0	0	0	0	0	0	0	0	0	0	0	0	0	0	0	0	0	0	1	0	1	0
0,0,-2,-2,0	0	0	0	0	0	0	0	0	0	0	0	0	0	0	0	0	0	0	1	0	0
0,0,2,2,-10	0	0	0	0	0	0	0	0	0	0	0	0	0	0	0	0	1	0	0	0	0
0,0,2,-2,10	0	0	0	0	0	0	0	0	1	0	0	0	0	0	0	0	0	0	0	0	0
0,0,2,2,2	0	0	0	0	0	0	0	0	0	0	0	0	0	0	0	0.333333	0	0	0	0	0
0,0,-2,-2,-2	0	0	0	0	0	0	0	0	0	0	0	0	0	0	0	0.333333	1	0	0	0	0
0,0,2,2,3	0	1	0	0	0	0	0	0	0	0	0	0	0	1	0	0	0	1	0	0	0
0,0,-2,-2,-3	0	0	0	0	0	0	0	0	0	0	1	0	0	0	0	0	0	0	0	0	0
0,0,2,2,4	0	0	1	0	0	0	0	0	0.5	0	0	0	0	0	0	0.333333	0	0	0	0	0
0,0,2,2,5	0	0	0	0	1	0	0	0	0	0	0	0	0	0	0	0.166667	0	0	0	0	0
0,0,2,-2,5	0	0	0	0	0	0	0	0	0	0	0	0	0	0	0	0.5	0	0	0	0	0
0,0,2,-2,-5	1	0	1	0	0	0	0	0	0	0	0	0	0	0	0	0	0.5	0	0	0	0
0,0,-2,-2,-5	0	0	0	0	0	0	0	0	0	0	0	0	0	0	0	0.333333	0	0	0	0	0
0,0,2,2,7	0	0	0	0	0	0	0	0	0	0	0	0	0	0	0	0.166667	0	0	0	0	0
0,0,2,2,-7	0	0	0	0	0	0	0	0	0.5	0	0	0	0	0	0	0	0	0	0	0	0
0,0,2,-2,-7	0	0	0	0	0	0	0	0	0	0	0	0	0	0	0	0	0.5	0	0	0	0
0,0,-2,-2,-7	0	0	0	0	0	0	0	0	1	0	0	0	0	0	0	0	0	0	0	0	0
0,0,-2,-2,-8	0	0	0	0	0	0	0	0	0	0	0	0	0	0	0	0.333333	0	0	0	0	0
0,0,2,2,9	0	0	0	0	0	0	0	1	0	0	0	0	0	0	0	0	0	0	0	0	0
0,0,2,20,24	0	0	0	0	0	0	0	0	0	0	0	0	0	0	0	0	0	1	0	0	0
0,0,-2,21,20	0	0	0	0	0	0	0	0	0	0	1	0	0	0	0	0	0	0	0	0	0
0,0,-2,-22,-17	0	0	0	0	0	0	0	0	1	0	0	0	0	0	0	0	0	0	0	0	0
0,0,2,3,0	0	0	0	0	0	0	0	0	0	0	0	0	0	0	0	0.333333	0	0	0	0	0
0,0,-2,3,0	0	0	0	0	0	0	0	0	0	0	0	0	0	0	0	1	0	0	0	0	0
0,0,-2,3,1	0	0	0	0	0	0	0	0	0	0	0	0	0	0	0	0	0	0	1	0	0
0,0,-2,-3,-10	0	0	0	0	0	0	0	0	0	0	0	0	0	1	0	0	0	0	0	0	0
0,0,2,3,-16	0	0	0	0	0	0	0	0	0	0	0	0	0	0	0	0.333333	0	0	0	0	0
0,0,2,-3,2	0	0	0	0	0	0	0	0	0	0	0	0	0	0	0	0	0	0	1	0	0
0,0,-2,3,2	0	0	0	0	0	0	0	0	0	0	0	0	0	0	0	0	0	1	0	0	0
0,0,-2,-3,2	0	0	0	0	0	0	0	0	0	0	0	0	0	0	0	0	1	0	0	0	0
0,0,-2,-3,-3	0	0	0	0	0	0	0	0	0	0	0	1	0	0	0	0	0	0	0	0	0
0,0,-2,3,4	0	0	0	0	0	0	0	0	0	0	0	0	0	0	0	0	1	0	0	0	0
0,0,-2,-3,-4	0	0	0	1	0	0	0	0	0	0	0	0	0	0	0	0	0	0	0	0	0
0,0,2,3,5	0	0	1	0	0	0	0	0	0	0	0	0	0	0	0	0.333333	0	0	0	1	0
0,0,-2,-3,-5	0	0	1	0	0	0	1	0	0	0	0	0	1	0	0	0	0	0	0	0	0
0,0,2,4,0	0	0	0	0	0	0	0	0	1	0	0	0	0	0	0	0	0	0	0	0	0
0,0,-2,-4,0	0	0	0	0	0	0	0	0	0	0	0	0.4	0	0	0	0	0.5	0	1	0	0
0,0,2,4,-2	0	0	0	0	0	0	0	0	0	0	0	0	0	0	0	0.5	0	0	0	0	0
0,0,-2,-4,-2	0	0	0	0	0	0	0	0	0	0	0	0.2	0	0	0	0	0	1	0	0	0
0,0,-2,-4,-4	0	0	0	0	0	0	0	0	0	0	0	0	0	0	0	0	0.5	0	0	0	0
0,0,2,4,5	1	0	0	0	1	0	0	0	0	0	0	0	0	0	0	0	0	0	0	0	0
0,0,2,4,6	0	0	1	0	0	0	0	0	0	0	0	0	0	0	0	0.5	0	0	0	0	0
0,0,2,-4,-7	0	0	0	0	0	0	0	0	0	0	0	0	0	0	0	1	0	0	0	0	0
0,0,-2,-4,-7	0	0	0	0	0	0	0	0	1	0	0	0.4	0	0	0	0	0	0	0	0	0
0,0,2,4,-8	0	0	0	0	0	0	0	0	0	0	0	0	0	0	0	0	0	0	0	0	1
0,0,2,-4,8	0	0	0	0	0	0	0	0	0	0	0	0	0	0	0	0	0	1	0	0	0
0,0,2,5,1	0	0	0	0	0	0	0	0	0	0	0	0	0	0	0	0	0	1	0	0	0
0,0,-2,5,-2	0	1	0	0	0	0	0	0	0	0	0	0	0	0	0	0	0	0	0	0	0
0,0,2,-5,-22	0	0	0	0	0	0	0	0	0.5	0	0	0	0	0	0	0	0	0	0	0	0
0,0,2,-5,-3	0	0	0	0	0	0	0	0	0.5	0	0	0	0	0	0	0	0	0	0	0	0
0,0,-2,-5,-5	0	0	0	0	0	0	0	0.5	0	0	0	0	0	0	0	0.333333	0	0	0	0	0
0,0,2,5,6	0	0	0	0	0	0	0	0	0	0	0	0	0	0	0	0.333333	0	0	0	0	0
0,0,-2,-5,-6	0	0	0	0	0	0	0	0	0	0	0	0	0	0	0	0.333333	0	0	0	0	0
0,0,2,5,7	0	0	0	0	0	0	0	0	0	0	0	0	0	0	0	0.666667	0	0	0	0	0
0,0,-2,-5,-7	0	0	0	0	0	0	0	0.5	0	0	0	0	1	0	0	0.333333	0	0	0	0	0
0,0,-2,-5,-8	0	0	0	0	0	0	0	0	0	0	0	0	0	0	0	0	0	0	0	0	1
0,0,-2,-5,-9	0	0	0	0	1	0	0	0	0	0	1	0	0	0	0	0	0	0	0	0	0
0,0,2,-6,-5	0	0	0	0	1	0	0	0	0	0	0	0	0	0	0	0	0	0	0	0	0
0,0,-2,-7,-11	0	0	1	0	0	0	0	0	0	0	0	0	0	0	0	0	0	0	0	0	0
0,0,-20,-15,-8	0	0	0	0	0	0	0	0	0	0	0	0	0	0	0	0	0	0	1	0	0
0,0,-21,-17,-14	0	0	0	0	0	0	0	0	0	0	0	0	0	0	0	0	0	0	0	0	1
0,0,-27,-24,-22	0	0	0	0	0	0	0	0	0	0	0	0	0	0	0	0	0	0	0	1	0
0,0,3,0,0	0	0	0	0	0	0	0	0	0	0	0	0.333333	0	0	0	0.6	0	0	0	0	0
0,0,-3,0,0	0	0	0	0	0	0	0	0.777778	0	0	0	0	0	0	0	0	0	0	0	1	0.5
0,0,-3,0,-1	0	0	0	0	0	0	0	0	0	0	0	0	0	0	0	0.5	0	0	0	0	0
0,0,-3,0,12	0	0	0	0	0	0	0	0.111111	0	0	0	0	0	0	0	0	0	0	0	0	0
0,0,3,0,-2	0	0	0	0	0	0	0	0	1	0	0	0	0	0	0	0.2	0	0	0	0	0
0,0,-3,0,2	0	0	0	0	0	0	0	0	0	0	0	0	0	0	0	0.5	0	0	0	0	0
0,0,3,0,3	1	0	0	0	0	0	0	1	0	0	0	0.666667	0	0	0	0	0	1	0	0	0
0,0,-3,0,-3	0	0	0	0	0	0	0	0	0	0	0	0	0	0	0	0	1	0	0	0	0
0,0,-3,0,-4	0	0	0	0	0	0	0	0	0	0	0	0	0	0	0	0	0	0	0	0	0.5
0,0,3,0,5	0	0	0	0	0	0	0	0	0	0	0	0	0	0	0	0	0	0	1	0	0
0,0,-3,0,7	0	0	0	0	0	0	0	0.111111	0	0	0	1	0	0	0	0	0	0	0	0	0
0,0,3,0,-9	0	0	0	0	0	0	0	0	0	0	0	0	0	0	0	0.2	0	0	0	0	0
0,0,3,1,0	0	0	0	0	0	0	0	0	0	0	0	0	0.5	0	0	0	0	0	0	0	0
0,0,3,1,1	0	0	0	0	0	0	0	0	0	0	0	0	0	0	0	0	0	0	1	0	1
0,0,3,-1,25	0	0	0	0	0	0	0	0	0	0	0	0	0	0	0	0	0	0	0	0	1
0,0,3,1,-6	0	0	0	0	0	0	0	0	0	0	0	0	0.5	0	0	0	0	0	0	0	0
0,0,-3,-10,-11	0	0	0	0	0	0	0	0	0	0	0	0	0	0	0	0	0	0	0	0	1
0,0,-3,13,23	0	0	0	0	0	0	0	0	0	0	0	0	0	0	0	0	1	0	0	0	0
0,0,3,2,0	0	0	0	0	0	0	0	0	0	0	0	0	0	0	0	0.333333	0	0	0	0	0
0,0,-3,2,0	0	0	0	0	0	0	0	0	0	0	0	0	0	0	1	0	0	0	0	0	0
0,0,3,2,-1	0	0	0	0	0	0	0	0	0	0	0	0	0	0	0	0.666667	0	0	0	0	0.333333
0,0,-3,-2,-1	0	0	0	1	0	0	0	0	0	0	0	0	0	0	0	0	0	0	0	0	0
0,0,3,2,-11	0	0	0	0	0	0	0	0	0	0	0	0	0	0	0	0	0	0	0	0	0.333333
0,0,3,2,2	0	0	0	0	0	0	0	0	0	0	0	0	0	0	0	0	0	0	0	0	0.333333
0,0,-3,-2,2	0.5	0	0	0	0	0	0	0	0	0	0	0	0	0	0	0	0	0	0	0	0
0,0,-3,-2,-2	0	0	1	0	0	0	0	0	0	0	0	0	0	0	0	0	0	0	0	0	0
0,0,-3,-2,-3	0.5	0	0	0	0	0	0	0	0	0	0	0	0	0	0	0	0	0	0	0	0
0,0,3,2,5	0	0	0	0	0	0	0	0	0	0	0	0	0	0	0	0	0	1	0	0	0
0,0,3,-2,5	0	0	0	0	0	0	0	0	0	0	0	0	0	0	0	0	0	0	1	0	0
0,0,3,-3,0	0	0	0	0	0	0	0	0	0	0	0	0	0	0	0	0	1	0	0	0	0
0,0,-3,-3,-15	0	0	0	0	0	0	0	0	0	0	0	0	0	0	0	0	0	0	0	1	0
0,0,-3,3,2	0	0	0	0	0	0	0	0	0	0	0	0	0	0	0	0	0	0	0	1	0
0,0,-3,-3,2	0	0	0	0	0	0	0	0	0	0	0	0	0	0	0	0	1	0	0	0	0
0,0,-3,-3,-2	0	1	0	0	0	0	0	0	0	0	0	0	0	0	0	0	0	0	0	0	0
0,0,3,3,3	0	0	0	0	0	0	0	0	0	0	0	0	0	0	0	0.5	1	0	0	0	0
0,0,-3,-3,-3	0	0	0	0	0	0	0	0	0	0	0.5	0	0	0	0	0	0	0	0	0	0
0,0,3,3,4	0	0	0	0	0	0	0	0	0	0	1	0	0	0.5	0	0	0	0	0	0	0
0,0,3,3,5	0	0	0	0	0	0	0	0	0	0	0	0	0	0	0	0.5	0	0	0	0	0
0,0,3,-3,5	0	0	0	0	0	0	0	0	0	0	0	0	0	0	0	1	0	0	0	0	0
0,0,-3,-3,-5	0	0	0	0	0	0	0	0	0.5	0	0.5	0	0	0	0	1	0	0	0	0	0
0,0,3,3,6	0	0	0	0	0	0	0	0	0	0	0	0	0	0.5	0	0	0	0	0	0	0
0,0,-3,-3,-6	0	0	0	0.5	0	0	0	0	0	0	0	0	0	0	0	0	0	0	0	0	0
0,0,-3,-3,-7	0	0	0	0.5	0	0	0	0	0.5	0	0	0	0	0	0	0	0	0	0	0	0
0,0,-3,-4,-1	0	0	0	0	0	0	0	0	0	0	1	0	0	0	0	0	0	0	0	0	0
0,0,-3,4,2	0	0	0	0	0	0	0	0	0	0	0	0	0	0	0	0	0	0	0	0	1
0,0,-3,-4,-3	0	0	0	1	0	0	0	0	0	0	0	0	0	0	0	0	0	0	0	0	0
0,0,-3,-4,-6	0	1	0	0	0	0	0	0	0	0	0	0	0	0	0	0	0	0	0	0	0
0,0,3,4,7	0	1	0	0	0	1	0	0	0	0	0	0	0	0	0	0	0	0	0	0	0
0,0,3,5,3	0	0	0	0	0	0	0	0	0	0	0	0	0	0	0.333333	1	0	0	0	0	0
0,0,-3,-5,-3	0	0	0	0	0	0	0	1	0	0	0	0	0	0	0	0	0	0	0	0	0
0,0,-3,-5,-4	0	0	0	0	0	0	0	0	0	0	0	0	0	1	0	0	0	0	0	0	0
0,0,3,5,5	0	0	0	0	0	0	0	1	0	0	0	0	0	0	0	0	0	0	0	0	0
0,0,3,5,6	0	0	0	0	1	0	0	0	0	0	0	0	0	0	0	0	0	0	0	0	0
0,0,-3,-5,-6	0	0	0	0	0	0	0	0	0	0	0	0	0	0	0	0	0	0	0	1	0
0,0,3,5,7	0	0	0	0	0	0	0	0	0	0	0	0	0	0	0.666667	0	0	0	0	0	0
0,0,-3,-5,-7	0	0	0	0	0	0	0	0	0	0	0	0	0	0	0	0.5	0	0	0	0	0
0,0,-3,-5,-8	0	0	0	0	0	0	0	0	0	0	0	0	0	0	0	0.5	0	0	0	0	0
0,0,3,6,10	0	0	0	0	0	0	0	0	0	0	0	1	0	0	0	0	0	0	0	0	0
0,0,-3,-6,-10	0	0	0	0	0	0	0	0	0	0	0	0	0	0.666667	0	0	0	0	0	0	0
0,0,-3,6,2	0	0	0	0	0	0	0	0	0	0	0	0	0	0	0	0	0	0	0	0	1
0,0,-3,-6,-3	0	0	0	0	0	0	0	0	0	0	0	1	0	0	0	0	0	0	0	0	0
0,0,-3,-6,-8	0	0	1	0	0	0	0	0	0	0	0	0	0	0.333333	0	0	0	0	0	0	0
0,0,3,7,0	0	0.5	0	0	0	0	0	0	0	0	0	0	0	0	0	0	0	0	0	0	0
0,0,3,7,10	1	0	0	0	0	0	0	0	0	0	0	0	0	1	0	0	0	0	0	0	0
0,0,-3,-7,-10	0	0	0	0	1	0	0	0	0	0	0	0	0	0	0	0	0	0	0	0	0
0,0,3,7,5	0	0.5	0	0	0	0	0	0	0	0	0	0	0	0	0	0	0	0	0	0	0
0,0,-3,-7,-8	0	0	0	0	0	0	0	0	0	0	0	0	0	0	1	0	0	0	0	0	0
0,0,-3,-8,-10	0	0	0.333333	0	0	0	0	0	0	0	0	0	0	0	0	0	0	0	0	0	0
0,0,3,8,12	0	0	0	0	0	0	0	0	0	0	0	0	0	1	0	0	0	0	0	0	0
0,0,-3,-8,-12	0	0	0.333333	0	0	0	0	0	0	0	0	0	0	0	0	0	0	0	0	1	0
0,0,-3,-8,-3	0	0	0	0	0	0	0	1	0	0	0	0	0	0	0	0	0	0	0	0	0
0,0,-3,-8,-4	0	0	0.333333	0	0	0	0	0	0	0	0	0	0	0	0	0	0	0	0	0	0
0,0,3,-9,-12	0	0	0	0	0	0	0	0	0	0	0	0	0	0	0	1	0	0	0	0	0
0,0,4,0,0	0	0	0	0	0	0	0	0	1	0	0	0	0	0	0	0	0	0	0	0	0
0,0,4,0,-1	0	0	0	0	0	0	0	0	0	0	0	0	0	0	0	0	0	0	0	0	1
0,0,4,0,-2	0	0	0	0	0	0	0	0	0	0	0	0	0	0	1	0	0	0	0	0	0
0,0,-4,0,-2	0	0	0	0	0	0	0	0.2	0	0	0	0	0	0	0	0	0	0	0	0	0
0,0,4,0,-3	0	0	1	0	0	0	0	0	0	0	0	0	0	0	0	0	0	0	0	0	0
0,0,-4,0,3	0	1	0	0	0	0	0	0.2	0	0	0	0	0	0	0	0	0	0	0	0	0
0,0,-4,0,4	0	0	0	0	0	0	0	0.6	0	0	0	0	0	0	0	0	0	0	0	0	0
0,0,-4,0,7	0	0	0	0	1	0	0	0	0	0	0	0	0	0	0	0	0	0	0	0	0
0,0,-4,-1,0	0	0	0	1	0	0	0	0	0	0	0	0	0	0	0	0	0	0	0	0	0
0,0,4,1,1	0	0	0	0	0	0	0	0	0	0	0	0	0	0	0	0	0	0	1	0	0
0,0,-4,-16,4	0	0	0	0	0	0	0	0	0	1	0	0	0	0	0	0	0	0	0	0	0
0,0,4,2,0	0	0	0	0	0	0	0	0	0	0	0	0	0	0	0	0	0	0	0	0	0.25
0,0,-4,-2,0	0	0	0	0	0	0	0	1	0	0	0	0	0	0	0	0	0	0	0	0	0
0,0,-4,2,-1	1	0	0	0	0	0	0	0	0	0	0	0	0	0	0	0	0	0	0	0	0
0,0,-4,-2,-1	0	1	0	0	0	0	0	0	0	0	0	0	0	0	0	0	0	0	0	0	0
0,0,4,2,2	0	0	0	0	0	0	0	0	0	0	0	0	0	0	0	0	0	0	0	0	0.5
0,0,-4,2,2	0	0	0	0	0	0	0	0	0	0	0	0	0	0	0	1	0	0	0	0	0
0,0,4,2,3	0	0	0	0	0	0	0	0	0	0	0	0	0	0	0	0	0	0	1	0	0
0,0,-4,2,3	0	0	0	0	0	0	0	0	1	0	0	0	0	0	0	0	0	0	0	0	0
0,0,4,2,4	0	0	0	0	0	0	0	0	0	0	0	0	0	0	0	0	0	0	0	0	0.25
0,0,-4,2,7	0	0	0	0	0	0	0	0	0	0	0	0	0	1	0	0	0	0	0	0	0
0,0,-4,-3,0	0	0	0	1	0	0	0	0	0	0	0	0	0	0	0	0	0	0	0	0	0
0,0,-4,-3,-1	0	0.5	0	0	0	0	0	0	0	0	0	0	0	0	0	0	0	0	0	0	0
0,0,-4,-3,14	0	0	0	0	0	0	0	0	0	0	0	0	0	0	0	0	0	0	0	0	1
0,0,-4,3,3	0	0	0	0	0	0	0	0	0	0	0	0	0	0	0	0	0	1	0	0	0
0,0,-4,-3,-4	0	0.5	0	0	0	0	0	0	0	1	0	0	0	0	0	0	0	0	0	0	0
0,0,4,-4,-1	0	0	0	0	0	0	0	0	0	0	0	0	0	0	0	0	1	0	0	0	0
0,0,4,4,5	0	0	0	0	0	0	0	0	0	0	0	0	0	0	0	0	0	1	0	0	0
0,0,-4,-4,-6	0	0	0	0.333333	0	0	0	0	0	0	0	0	0	0	0	0	0	0	0	0	0
0,0,-4,-4,-8	1	0	0	0.666667	0	0	0	0	0	0	0	0	0	0	0	0	0	0	0	0	0
0,0,4,4,9	0	0	0	0	0	0	0	1	0	0	0	0	0	0	0	0	0	0	0	0	0
0,0,-4,-5,0	1	0	0	0	0	0	0	0	0	0	0	0	0	0	0	0	0	0	0	0	0
0,0,-4,5,3	0	0	0	0	0	0	0	0	0	0	0	0	0	0	0	0	0	0	0	0	1
0,0,-4,-7,0	0	0	0	0	0.5	0	0	0	0	0	0	0	0	0	0	0	0	0.5	0	0	0
0,0,-4,-7,1	0	0	0	0	0	0	0	0	0	0	0	0	0	0	0	0	1	0	0	0	0
0,0,-4,-7,-11	0	0	0	0	0	0	0	0	0	0	0	0	1	0	0	0	0	0	0	0	0
0,0,4,7,12	0	0	0	0	0	0	0	0	0	0	0	0	0	1	0	0	0	0	0	0	0
0,0,-4,-7,-2	0	0	0	0	0	0	0	0	0	0	1	0	0	0	0	0	0	0	0	0	0
0,0,-4,-7,3	0	0	0	0	0.5	0	0	0	0	0	0	0	0	0	0	0	0	0	0	0	0
0,0,4,7,4	0.5	0	0	0	0	0	0	0	0	0	0	0	0	0	0	0	0	0	0	0	0
0,0,-4,-7,-4	0	0	1	0	0	0	0	0	0	0	0	0	0	0	0	0	0	0	0	0	0
0,0,4,7,5	0.5	0	0	0	0	0	0	0	0	0	0	0	0	0	0	0	0	0	0	0	0
0,0,-4,-7,-7	0	1	0	0	0	0	0	0	0	0	0	0	0	0	0	0	0	0.5	0	0	0
0,0,4,9,0	0	0	0	0	0	0	0	0	0	0	0	0	0	0	0	1	0	0	0	0	0
0,0,4,9,9	0	0	0	0	0	0	0	0	0	0	0	0	0	0	0	0	0	0	0	0	1
0,0,-5,0,0	0	0	0	0	0	0	0	0	0	0	0	0	0	0	0	0	0	0	1	0	0
0,0,-5,0,-1	0	0	0	0	0	0	0	0	1	0	0	0	0	0	0	0	0	0	0	0	0
0,0,5,0,5	0	0	0	0	0	0	0	1	0	0	0	0	0	0	0	0	0	0	0	0	0
0,0,5,10,12	0	0	0	0	0	0	0	0	0	0	1	0	0	0	0	0	0	0	0	0	0
0,0,-5,-12,-6	0	0	1	0	0	0	0	0	0	0	0	0	0	0	0	0	0	0	0	0	0
0,0,5,12,8	0	0	0	0	0	0	0	0	1	0	0	0	0	0	0	0	0	0	0	0	0
0,0,5,2,5	0	0	0	0	0	0	0	0	0	0	0	1	0	0	0	0	0	0	0	0	0
0,0,5,2,7	0	0	0	0	0	0	0	0	0	0	0	0	0	0	0	0	0	0	0	1	0
0,0,-5,-3,0	0	0	0	0	0	0	0	0	0	0	1	0	0	0	0	0	0	0	0	0	0
0,0,5,3,2	0	0	0	0	0	0	0	0	0	0	0	0	0	0	0	0	1	0	0	0	0
0,0,5,3,3	0	0	0	0	0	0	0	0	0	0	0	1	0	0	0	0	0	0	0	0	0
0,0,5,3,-4	0	0	0	0	0	0	0	0	0	0	0	0	1	0	0	0	0	0	0	0	0
0,0,5,4,0	0	0	0	0	0	0	0	0	0	0	0	0	0	0	0	0	0	0	0	0	0.666667
0,0,-5,-4,-3	0	0	0	0	0	0	0	0	0	0	1	0	0	0	0	0	0	0	0	0	0
0,0,5,4,6	0	0	0	0	0	0	0	0	0	0	0	0	0	0	0	0	1	0	0	0	0
0,0,5,4,8	0	0	0	0	0	0	0	0	0	0	0	0	0	0	0	0	0	0	0	0	0.333333
0,0,5,5,1	0	0	0	0	0	0	0	0	0	0	0	0	0	0	0	0.333333	0	0	0	0	0
0,0,5,5,-1	0	0	0	0	0	0	0	0	0	0	0	0	0	0	0	0	1	0	0	0	0
0,0,-5,-5,-10	0	0	0	0	0	0	0	0	1	0	0	0	0	0	0	0	0	0	0	0	0
0,0,5,5,-5	0	0	0	0	0	0	0	0	0	0	0	0	0	0	0	0.333333	0	0	0	0	0
0,0,5,5,8	0	0	0	0	0	1	0	0	0	0	0	0	0	0	0	0.333333	0	0	0	0	0
0,0,-5,-6,0	1	0	0	0	0	0	0	0	0	0	0	0	0	0	0	0	0	0	0	0	0
0,0,5,6,9	0	0	0	0	0	0	0	0	0	0	0	0	0	1	0	0	0	0	0	0	0
0,0,-5,-7,-10	0	0	0	0	0	0	0	1	0	0	0	0	0	0	0	0	0	0	0	0	0
0,0,-5,-7,-12	0	0	1	0	0	0	0	0	0	0	0	0	0	0	0	0	0	0	0	0	0
0,0,-5,-7,-2	0	0	0	0	0	0	0	0	1	0	0	0	0	0	0	0	0	0	0	0	0
0,0,5,7,7	0	0	0	0	0	0	0	0	0	0	0	0	0	0	0	0	0	0	0	0	1
0,0,-5,-8,0	0	0	0	0	1	0	0	0	0	0	0	0	0	0	0	0	0	0	0	0	0
0,0,-5,-9,-12	0	0	1	0	0	0	0	0	1	0	0	0	0	0	0	0	0	0	0	0	0
0,0,5,9,7	0	0	0	0	0	0	0	0	0	0	0	0	0	1	0	0	0	0	0	0	0
0,0,-6,0,0	0	0	0	0	0	0	0	0	0	0	0	0	0	0	0	0	1	0	0	0	0
0,0,-6,0,-7	0	0	0	0	0	0	0	0	0	0	0	0	0	1	0	0	0	0	0	0	0
0,0,-6,-1,-26	0	0	0	0	0	0	0	0	0	0	1	0	0	0	0	0	0	0	0	0	0
0,0,-6,-2,0	0	0	0	0	0	0	0	0	0	0	0	0	0	0	0	0	1	0	0	0	0
0,0,-6,-2,-4	0	0	0	0	0	0	0	0	0	0	0	0	0	0	0	0	0	0	0	0	1
0,0,-6,-3,-6	0	0	0	0	0	0	0	0	0	0	0	0	0	0	0	1	0	0	0	0	0
0,0,6,4,0	0	0	0	0	0	0	0	0	0	0	0	0	0	0	0	0	0	0	0	0	0.5
0,0,6,4,1	0	0	0	0	0	0	0	0	0	0	0	0	0	0	0	0	0	0	0	0	0.5
0,0,-6,-4,-2	0	1	0	0	0	0	0	0	0	0	0	0	0	0	0	0	0	0	0	0	0
0,0,-6,4,4	0	0	0	0	0	0	0	0	0	0	0	0	0	0	0	0	0	0	0	0	1
0,0,-6,-6,-3	0	0	0	0	0	0	0	0	0	0	0	0	0	0	0	1	0	0	0	0	0
0,0,-6,-9,-12	0	0	0	0	1	0	0	0	0	0	0	0	0	0	0	0	0	0	0	0	0
0,0,-7,0,-7	0	0	0	0	0	0	0	0	0	0	0	1	0	0	0	0	1	0	0	0	0
0,0,7,0,9	0	0	0	0	0	0	0	1	0	0	0	0	0	0	0	0	0	0	0	0	0
0,0,-7,-10,0	0	0	0	0	0	0	0	0	0	0	0	0	0	0	0	0	0	0	0	1	0
0,0,-7,-10,-10	0	0	0	0	0	0	0	0	0	0	0	1	0	0	0	0	0	0	0	0	0
0,0,-7,-21,-19	0	0	0	0	0	0	0	0	0	0	0	0	0	0	0	0	0	1	0	0	0
0,0,7,3,-1	0	1	0	0	0	0	0	0	0	0	0	0	0	0	0	0	0	0	0	0	0
0,0,-7,-31,-28	0	0	0	0	0	0	0	0	0	0	0	0	0	0	0	0	0	0	0	0	1
0,0,-7,-4,0	0	0	0	0	0	0	0	0	0	0	0	0	1	0	0	0	0	0	0	0	0
0,0,-7,-4,5	0	0	0	0	0	0	0	1	0	0	0	0	0	0	0	0	0	0	0	0	0
0,0,7,5,0	0	0	0	0	0	0	0	0	0	0	0	0	1	0	0	0	0	0	0	0	0
0,0,7,5,3	0	0	0	0	0	0	0	0	0	0	0	0	0	0	0	0	0	1	0	0	0
0,0,7,5,-7	0	0	0	0	0	0	0	0	0	1	0	0	0	0	0	0	0	0	0	0	0
0,0,-7,-7,0	0	0	0	0	0	0	0	0	1	0	0	0	0	0	0	0	0	0	0	0	0
0,0,7,7,14	0	0	0	0	0	0	0	0	0.5	0	0	0	0	0	0	0	0	0	0	0	0
0,0,7,7,5	0	0	0	0	0	0	0	0	0.5	0	0	0	0	0	0	0	0	0	0	0	0
0,0,7,7,7	0	0	0	0	0	0	0	0	0	0	0	0	0	0	0	1	1	0	0	0	0
0,0,7,9,3	0	0	0	0	0	0	0	0	0	0	0	1	0	0	0	0	0	0	0	0	0
0,0,-7,-9,-7	0	0	0	0	0	0	0	0	0	0	0	0	0	0	1	0	0	0	0	0	0
0,0,-8,-1,-1	0	0	0	0	0	0	0	0	1	0	0	0	0	0	0	0	0	0	0	0	0
0,0,-8,2,0	0	0	0	0	0	0	0	0	0	0	0	0	0	0	1	0	0	0	0	0	0
0,0,8,4,1	0	1	0	0	0	0	0	0	0	0	0	0	0	0	0	0	0	0	0	0	0
0,0,-8,-6,-4	0	0	0	1	0	0	0	0	0	0	0	0	0	0	0	0	0	0	0	0	0
0,0,-8,-7,-6	0	0	0	0	0	0	0	0	0	0	1	0	0	0	0	0	0	0	0	0	0
0,0,8,8,4	0	1	0	0	0	0	0	0	0	0	0	0	0	0	0	0	0	0	0	0	0
0,0,8,9,8	0	0	0	0	0	0	0	1	0	0	0	0	0	0	0	0	0	0	0	0	0
0,0,9,0,0	0	0	0	0	0	0	0	0	0	0	0	1	0	0	0	0	0	0	0	0	0
0,0,-9,0,0	0	0	0	0	0	0	0	0	0	0	0	0	0	0	0	0	0	0	0	0	1
0,0,9,5,9	0	0	0	0	0	0	0	0	0	0	0	0	1	0	0	0	0	0	0	0	0
0,0,-9,-6,-2	0	0	0	0	0	0	0	0	0	0	0	0	0	1	0	0	0	0	0	0	0
0,0,-9,-6,-4	0	0	0	0	0	0	0	0	0	0	0	0	0	0	0	0	1	0	0	0	0
0,0,-9,-7,-6	0	0	0	1	0	0	0	0	0	0	0	0	0	0	0	0	0	0	0	0	0
0,0,9,7,7	0	0	0	0	0	0	0	0	0	0	0	0	0	0	0	0	0	1	0	0	0
0,0,-9,-7,-9	0	0	0	0	0	0	0	1	0	0	0	0	0	0	0	0	0	0	0	0	0
0,0,-9,-9,-12	0	0	0	0	0	0	0	0	1	0	0	0	0	0	0	0	0	0	0	0	0
0,-1,0,0,0	0	0	0	0	0	0	0	0	0	0	0	0	0	0	0	0	0	0	0	0	1
0,1,0,0,1	0	0.333333	0	0	0	0	0	0	0	0	0.8	0	1	0	0	0	0	0	0	0	0
0,1,0,0,2	0	0	0	0	0	0	0	0	0.5	0	0	0	0	0	0	0	0	0	0	0	0.5
0,1,0,0,-2	0	0	0	0	0	0	0	0	0.5	0	0.2	0	0	0	0	0	0	0	0	0	0
0,1,0,0,-21	0	0	0	0	0	0	0	0	0	0	0	0	0	0	0	0	0	0	0	0	0.5
0,1,0,0,-3	0	0.333333	0	0	0	0	0	0	0	0	0	0	0	0	0	0	0	0	0	0	0
0,1,0,0,-4	0	0.333333	0	0	0	0	0	0	0	0	0	0	0	0	0	0	0	0	0	0	0
0,-1,0,0,4	1	0	0	0	0	0	0	0	0	0	0	0	0	0	0	0	0	0	0	0	0
0,1,0,1,0	0.333333	0.666667	0	0	0	0	0	0	1	0	1	0	0	0	0.75	0	0	0	0	0	0
0,1,0,-1,0	0	0	1	0	0	0	0	0	0	0	0.608696	0	0	1	0	0	0	0	0	0	0
0,-1,0,1,0	0	0	0	0	0	0	0	0	0	0	0	0	0	0.142857	0	0	0	0	0	0	1
0,-1,0,-1,0	0	0.333333	0	0	0	0	0	0	0	0	0	0	0	0	1	0	0.5	0	0	0	0
0,1,0,-1,-1	0	0	0	0	0	0	0	0	0.5	0	0	0	0	0	0	0	0	0	0	0	0
0,-1,0,1,1	0	0	0	0	0	0	0	0	0	0	0	0	0	0.714286	0	0	0	0	0	0	0
0,-1,0,-1,-1	0	0.166667	0	0	0	0	0	0	0.5	0	0.117647	0	0	0	0	0	0	0	0	0	0
0,1,0,1,2	0	0	0	0	0	0	0	0	0	0	0	0	0	0.5	0	0	0	0	0	0	0
0,1,0,1,-2	0.666667	0	1	0	0	0	0	0	0	0	0	0	0	0	0	0	0	0	0	0	0
0,1,0,-1,-2	0.5	1	0	1	0	0.5	1	0	0	0	0.391304	0	0	0	0	0	0	0	0	0	0
0,-1,0,1,2	0	0	0	0	0	0	0	0	0	0	1	0	0	0.142857	0	0	0	0	0	0	0
0,-1,0,-1,2	0	0	0	0	0	0	0	0	0	0	0.0588235	0	0	0	0	0	0	0	0	0	0
0,-1,0,-1,-2	0	0	0	0	0	0	0	0	0.5	0	0.764706	0	0	1	0	0	0	0	0	0	0
0,1,0,1,3	0	0.333333	0	0	0	0.75	0	0	0	0	0	0	0	0.5	0.25	1	0	0	0	1	1
0,1,0,-1,-3	0.5	0	0	0	0	0.5	0	0	0	0	0	0	0	0	0	0	0	0	0	0	0
0,-1,0,1,3	0	0	0	1	0	0	0	0	0	0	0	0	0	0	0	0	0	0	0	0	0
0,-1,0,-1,-3	0.666667	0.166667	0	1	0	0	0.833333	0	0	0	0	0	0	0	0	0	0	0	0	0	1
0,1,0,1,4	0	0	0	0	0	0.25	0	0	0	0	0	0	0	0	0	0	1	0	0	0	0
0,-1,0,1,4	0	1	0	0	0	0	0	0	0	0	0	0	0	0	0	0	0	0	0	0	0
0,-1,0,-1,-4	0	0.166667	0	0	0	0	0.166667	0	0	0	0.0588235	0	0	0	0	0	0	0	0	0	0
0,1,0,-1,5	0	0	0	0	0	0	0	0	0.5	0	0	0	0	0	0	0	0	0	0	0	0
0,-1,0,-1,-5	0	0.166667	0	0	0	0	0	0	0	0	0	0	1	0	0	0	0	0	0	0	0
0,-1,0,-1,-6	0.333333	0	0	0	0	0	0	0	0	0	0	0	0	0	0	0	0	0	0	0	0
0,-1,0,-1,8	0	0	0	0	0	0	0	0	0	0	0	0	0	0	0	0	0.5	0	0	0	0
0,-1,0,10,10	0	0	0	0	0	0	0	0	0	0	1	0	0	0	0	0	0	0	0	0	0
0,-1,0,11,12	1	0	0	0	0	0	0	0	0	0	0	0	0	0	0	0	0	0	0	0	0
0,-1,0,-12,1	1	0	0	0	0	0	0	0	0	0	0	0	0	0	0	0	0	0	0	0	0
0,-1,0,12,10	0	0	0	0	1	0	0	0	0	0	0	0	0	0	0	0	0	0	0	0	0
0,1,0,-2,0	0	0.333333	0	0	0	0	0.222222	0	0.5	0	0.333333	0	0	0	0	0	0	0	0	0	1
0,-1,0,2,0	0	0	0	0	0	0	0	0	0	0	0	0	0	0	0	0.75	0	0	0	0.5	0.5
0,1,0,2,1	0.5	0	0	0	0	0	0	0	0	0	0	0	0	0	0	0	0	0	0	0	0
0,1,0,2,-1	0.5	0	0	0	0	0	0	0	0	0	0	0	0	0	0	0	0	0	0	1	0
0,1,0,-2,1	0	0	0	1	0	0	0	0	0	0	0.666667	0	0	0	0	0	0	0	0	0	0
0,-1,0,2,1	0	0	0	0	0	0	0	0	0	0	0	0	0	0	0	0	0	0	0	0	0.5
0,-1,0,2,-1	0	0	0	0	0	0	0	0	0	0	0	0	0	0.5	0	0	0	0	0	0	0
0,1,0,-2,-2	0	0.333333	0	0	0	0	0	0	0	0	0	0	0	0	0	0	0	0	0	0	0
0,1,0,-2,-3	1	0	0	0	0	1	0.222222	0	0	0	0	0	0.5	0	0	0	0	0	0	0	0
0,-1,0,2,3	1	0.5	0	1	0	1	1	0	0	0	0	0	0	0	0	0	0	1	0	0.5	0
0,1,0,-2,-4	0	0.333333	0	0	0	0	0.333333	0	0.5	0.5	0	0	0.5	0	0	0	0	0	0	1	0
0,-1,0,2,4	0	0.5	0	0	0	0	0	0	1	0	0	0	0	0	1	0	0	0	0	0	0
0,1,0,-2,5	0	0	0	0	0	0	0	0	0	0.5	0	0	0	0	0	0	0	0	0	0	0
0,1,0,-2,-5	0	0	0	0	0	0	0.222222	1	0	0	0	1	0	0	0	0	0	0	0	0	0
0,-1,0,2,5	0	0	0	0	0	0	0	0	0	0	0	0	0	0.5	0	0.25	0	0	0	0	0
0,1,0,-2,-6	0	0	0.5	0	0	0	0	0	0	0	0	0	0	1	0	0	0	0	0	0	0
0,1,0,-2,-7	0	0	0.5	0	0	0	0	0	0	0	0	0	0	0	0	0	0	0	0	0	0
0,1,0,3,0	0.875	0	0	0	0	0	0	0	0	0	0.5	0	0	0	0	0	0	0	0	0	0.5
0,1,0,-3,0	0	0	0	0	0	0	0	0	0	0	1	0	0	0	0	0	0	0	0	0	0
0,1,0,-3,1	0	0	0	0	0	0	0	0	0	0	0	0	0	0.5	0	0	0	0	0	0	0
0,1,0,3,2	0.125	0	0	0	0	0	0	0	0	0	0	0	0	0	0	0	0	0	0	0	0
0,1,0,-3,-2	0	0.5	0	0	0	0	1	0	0	0	0	0	0	0	0	0	0	0	0	0	0
0,-1,0,3,2	0.666667	0	0	0	0	0	0	0	0	0	0	0	0	0	0.5	0	0	0	0	0	0
0,1,0,3,20	0	0	0	0	0	0	0	0	0	0	0	0	0	0	0	0	0	0	0	0	0.5
0,-1,0,3,3	0	0	0	0	0	0	0	0	0	0	0	0	0	0	0.5	0	1	0	0	0	0
0,1,0,3,4	0	0	0	0	0	0	0	0	0	0	0.5	0	0	0	0	0	0	0	0	0	0
0,-1,0,-3,-4	0.428571	0	0.5	0	0	1	1	0	0	0	1	0	0	0	0	0	0	0	0	0	0
0,1,0,-3,5	0	0	0	0	0	0	0	0	0	0	0	0	0	0.5	0	0	0	0	0	0	0
0,1,0,-3,-5	0	0	0	0	0	0	0	0	0	0	0	0	0	0	0	1	0	0	0	0	0
0,-1,0,-3,5	0.142857	0	0	0	0	0	0	0	0	0	0	0	0	0	0	0	0	0	0	0	0
0,1,0,-3,-6	0	0	0	0	0	0	0	0	1	0	0	0	0	0	0	0	0	0	0	0	0
0,-1,0,3,6	0	0	0	0	0	1	1	0	0	0	0	0	0	0	0	0	0	0	0	0	0
0,-1,0,-3,-6	0.142857	0	0.5	1	0	0	0	0	0	0	0	0	0	0	1	0	0	0	0	0	0
0,1,0,-3,-7	0	0.5	0	0	0	0	0	0	0	0	0	0	1	0	0	0	0	0	0	0	0
0,-1,0,3,7	0.333333	0	1	0	0	0	0	0	0	1	0	0	1	0	0	0	0	0	0	0	0
0,-1,0,-3,-7	0.142857	0	0	0	0	0	0	0	0	0	0	0	0	0	0	0	0	0	0	0	0
0,1,0,3,8	0	0	0	0	0	0	0	0	0	1	0	0	0	0	0	0	0	0	0	0	0
0,-1,0,-3,9	0.142857	0	0	0	0	0	0	0	0	0	0	0	0	0	0	0	0	0	0	0	0
0,-1,0,4,3	1	0	0	0	0	0	0	0	0	0	0	0	0	1	0	0	0	0	0	0	0
0,-1,0,-4,-3	0	0	0	0	0	0	0	0	0	0	0	0	0	0	0	0	0	0	0	1	0
0,1,0,-4,-5	0	0	0	0	0	0	0	0	0	0	0	0	0	0.666667	0	0	0	0	0	0	0
0,-1,0,4,5	0	0	0.5	0	0	0	0	0	0	0	0	0	0	0	0	0	0	0	0	0	0
0,1,0,-4,-7	0	1	1	0	0	0	0	0	0	0	0	0	0.666667	0.333333	0	0	0	0	0	0	0
0,-1,0,4,7	0	0	0.5	1	1	1	1	0	0	0	0	0	0.8	0	0	0	0	0	0	0	0
0,-1,0,-4,-7	0	1	0	0	0	0	0	0	0	0	0	0	0	0	0	0	0	0	0	0	0
0,1,0,-4,-8	0	0	0	0	0	0	0	0	0	0	0	0	0	0	0	0	0	1	0	0	0
0,-1,0,4,8	0	0	0	0	0	0	0	0	0	0	0	0	0.2	0	0	0	0	0	0	0	0
0,1,0,-4,-9	0	0	0	0	0	0	0	0	0	0	0	0	0.333333	0	0	0	0	0	0	0	0
0,-1,0,-4,-9	0	0	0	0	0	0	0	0	0	0	0	0	0	0	0	0	0	0	0	0	1
0,-1,0,-5,-10	0	1	0	0	0	0	0	0	0	0	0	0	0	0	0	0	0	0	0	0	0
0,1,0,-5,-11	1	0	0	0	0	0	0	0	0	0	0	0	0	0	0	0	0	0	0	0	0
0,-1,0,-5,-3	0	0	0	0	0	0	0	0	0	0	0	0	0	0	0	0	0	0	0	1	0
0,1,0,-5,-4	0	1	0	0	0	0	0	0	0	0	0	0	0	0	0	0	0	0	0	0	0
0,1,0,-5,-6	0	0	0	0	0	0	0	0	0	0	0	0	0	1	0	0	0	0	0	0	0
0,-1,0,5,6	0	0	0	0	0	0	0	0	0	0	0	0	0	1	0	0	0	0	0	0	0
0,1,0,5,8	0	1	0	0	0	0	0	0	0	0	0	0	0	0	0	0	0	0	0	0	0
0,-1,0,-5,-8	1	0	0	0	0	0	0	0	0	0	0	0	0	0	0	0	0	0	0	0	0
0,1,0,6,5	0	0	0	0	0	1	0	0	0	0	0	0	0	0	0	0	0	0	0	0	0
0,1,0,6,6	1	0	0	0	0	0	0	0	0	0	0	0	0	0	0	0	0	0	0	0	0
0,1,0,-6,-7	0	0	0	0	0	0	0	0	0	0	0	0	0	1	0	0	0	0	0	0	0
0,-1,0,6,7	0	0	0	0	0	0	0	0	0	0	0	0	0	1	0	0	0	0	0	0	0
0,-1,0,7,11	1	0	0	0	0	0	0	0	0	0	0	0	0	0	0	0	0	0	0	0	0
0,1,0,-7,-5	0	1	0	0	0	0	0	0	0	0	0	0	0	0	0	0	0	0	0	0	0
0,-1,0,8,0	0	0	0	0	0	0	0	0	0	0	1	0	0	0	0	0	0	0	0	0	0
0,1,0,-8,-10	0	1	0	0	0	0	0	0	0	0	0	0	0	0	0	0	0	0	0	0	0
0,-1,0,-8,-10	0	0	1	0	0	0	0	0	0	0	0	0	0	0	0	0	0	0	0	0	0
0,1,0,8,4	1	0	0	0	0	0	0	0	0	0	0	0	0	0	0	0	0	0	0	0	0
0,1,0,-9,-10	0	0	0	1	0	0	0	0	0	0	0	0	0	0	0	0	0	0	0	0	0
0,1,0,9,11	0	0	0	0	0	0	0	0	0	0	0	0	0	0	0	0	1	0	0	0	0
0,1,0,9,5	0	0	0	0	0	0	0	0	0	0	0	0	1	0	0	0	0	0	0	0	0
0,-1,0,9,6	0	0	0	0	0	0	0	0	0	0	0	0	0	1	0	0	0	0	0	0	0
0,1,1,0,0	0	0	0	0	0	0	0	0	0	0	0	0	0	0	0	1	0	0	0	0	0
0,1,1,0,1	0	0	1	0	0	0	0	0	0	0	0	0	0	0.8	0	0	0	0	0	0	0
0,1,1,0,-1	0	0	0	0	0	0	0	0	0	0	0	0	0	0.2	0	0	0	0	0	0	0
0,1,-1,0,1	0	0	0.5	0	0	0	0	0	0	0	0	0	0	0	0	0	0	0	0	0	0
0,1,-1,0,-1	1	0	0	0	0	0	0	0	0	0	0.5	0	0	0	0	0	0	0	0	0	0
0,-1,1,0,1	1	0	0	0	0	0	0	0	0	0	0	0	0	0	0	0	0	0	0	0	0
0,-1,-1,0,1	0	0	0	0	0	0	0	0	0	0	0.25	0	0	0	0	0	0	0	0	0	0
0,-1,-1,0,-1	0	0.333333	0	0	0	0	0	0	0	0	0.75	0	1	0	0	0	0	0	0	0	0
0,1,-1,0,-2	0	1	0	0.5	0	0	0	0	0	0	0	0	0	0	0	0	0	0	0	0	0
0,-1,1,0,-2	0	0	0	0	0	0	0	0	0	0	1	0	0	0	0	0	0	0	0	0	0
0,-1,-1,0,2	0	0.333333	0	0	0	0	0	0	0	0	0	0	0	0	0	0	0	0	0	0	0
0,-1,-1,0,-2	0	0	1	0	0	0	0	0	0	0	0	0	0	0	0	0	0	0	0	0	0
0,1,-1,0,-3	0	0	0	0	0	0	0	0	0	0	0.5	0	0	0	0	0	0	0	0	0	0
0,-1,-1,0,3	0	0.333333	0	0	0	0	0	0	0	0	0	0	0	0	0	0	0	0	0	0	0
0,1,1,0,-4	0	1	0	0	0	0	0	0	0	0	0	0	0	0	0	0	0	0	0	0	0
0,1,-1,0,-4	0	0	0	0	1	0	0	0	0	0	0	0	0	0	0	0	0	0	0	0	0
0,-1,-1,0,4	0	0	0	0	0.5	0	1	0	0	0	0	0	0	0	0	0	0	0	0	0	0
0,-1,-1,0,-4	0	0	0	0	0.5	0	0	0	0	0	0	0	0	0	0	0	0	0	0	0	0
0,-1,-1,0,-5	0	0	0	1	0	0	0	0	0	0	0	0	0	0	0	0	0	0	0	0	0
0,1,-1,0,7	0	0	0.5	0	0	0	0	0	0	0	0	0	0	0	0	0	0	0	0	0	0
0,1,-1,0,-9	0	0	0	0.5	0	0	0	0	0	0	0	0	0	0	0	0	0	0	0	0	0
0,-1,-1,-1,0	0	0	0	0	0	0	0	0	1	0	1	0	0	0	0	0	0	0	0	0	0
0,1,1,1,1	0	0	0	0	0	0	0	0	0	0	1	0	1	0	0	0	0	0	0	0	0.333333
0,1,1,1,-1	0	1	0	0	0	0	0	0	0	0	0	0	0	0	0	0	0	0	0	0	0
0,1,-1,1,-1	0	0	0	0	0.5	0.5	0	0	0	0	0	0	0	0	0	0	0	0	0	0	0
0,1,-1,-1,-1	0	0	0	0	0	0	0	0	0	0	1	0	0	0	0	0	0	0	0	0	0
0,-1,1,1,-1	0	0	0	0	0	0	0	0	0	0	1	0	0	0	0	0	0	0	0	0	0
0,-1,-1,-1,-1	0	0	0	0	0	0	0	0	0	0	0	0	1	0	0	0	0	0	0	0	0
0,1,1,1,2	0	0	0	0	0	0	0	0	0	0	0	0	0	0	0	0	0	0	0	0	0.333333
0,1,1,-1,-2	0	0	0	0	0	0	0	0	0	0	0	0	0	1	0	0	0	0	0	0	0
0,1,-1,1,2	0	0	0	1	0	0	0	0	0	0	0	0	0	0	0	0	0	0	0	0	0
0,-1,1,-1,-2	0	0	0	0	0	1	0	0	0	0	1	0	0	0	0	0	0	0	0	0	0
0,1,1,1,3	0	0	1	0	0	0	0	0	0	0	0	0	0	0	0	0	0	0	0	0	0
0,1,-1,1,3	0	0	0	0	0	0.5	0	0	0	0	0	0	0	0	0	0	0	0	0	0	0
0,-1,1,-1,3	0	0	0	0	0	0	0	0	0	0	0	0	0	0	0	1	0	0	0	0	0
0,-1,1,-1,-3	0	0	0	0	0	0	0	0	1	0	0	0	0	0	0	0	0	0	0	0	0
0,-1,-1,1,3	0	0	0	0	0	0	0	0	0	0	0	0	0	0	0	0	0	0	0	0	1
0,-1,-1,1,-3	0	0	0	0	0	0	0	0	1	0	0	0	0	0	0	0	0	0	0	0	0
0,-1,-1,-1,-3	0	0	0	0	0	0	0	0	0	0	0	0	0	0	0	1	0	0	0	0	0
0,1,-1,1,5	0	0	0	0	0.5	0	0	0	0	0	0	0	0	0	0	0	0	0	0	0	0
0,-1,-1,-1,6	0	0	0	0	0	0	0	0	0	1	0	0	0	0	0	0	0	0	0	0	0
0,1,1,1,-8	0	0	0	0	0	0	0	0	0	0	0	0	0	0	0	0	0	0	0	0	0.333333
0,1,1,11,5	0	0	0	0	0	0	0	0	0	1	0	0	0	0	0	0	0	0	0	0	0
0,-1,-1,-12,-8	0	0	0	0	0	0	0	0	0	0	0	0	0	0	0	1	0	0	0	0	0
0,1,1,13,9	0	0	0	0	0	1	0	0	0	0	0	0	0	0	0	0	0	0	0	0	0
0,-1,1,-16,-11	0	0	0	0	0	0	0	0	0	0	1	0	0	0	0	0	0	0	0	0	0
0,1,-1,-2,0	0	0	1	0	0	0	0	0	0	0	0	0	0	0	0	0	0	0	0	0	0
0,-1,1,-2,0	0	0	0	0	0	0	0	0	0	0	0	0	0	0	0	0	0	0	0	1	0
0,-1,-1,2,0	0	0	0	0	0	0	0	0	0	0	0	0	0	0	0	0	0	0	0.5	0	0.5
0,1,-1,-2,-1	0	0	0	1	0	0	0	0	0	0	0	0	0	0	0	0	0	0	0	0	0
0,-1,1,-2,-1	1	0	0	0	0	0	0	0	0	0	0	0	0	0	0	0	0	0	0	0	0
0,-1,-1,2,-1	1	0	0	0	0	0	0	0	0	0	0	0	0	0	0	0	0	0	0	0	0
0,-1,-1,-2,1	0	0	0	0	0	0	0	0	0	0	0	0	0	0	0	0	0	0	0	0	1
0,-1,-1,-2,-1	0	0	0	0	0	1	0	0	0	0	0	0	0	0	0	0	0	0	0	0	0
0,1,1,2,-2	0	0	0	0	0	0	0	0	0	0	0	0	1	0	0	0	0	0	0	0	0
0,-1,-1,2,-2	0	0	0	0	0	0	0	0	0	0	0	0	0	0	0	0	0	0	0	0	0.5
0,-1,-1,-2,-2	0	0	0	0	0	0	0	0	0	0	1	0	0	0	0	0	0	0	0	0	0
0,1,1,2,3	0	0	0	1	0	0	0	0	0	0	0	0	0	0	0	0	0	0	0	0	0
0,1,1,-2,-3	0	1	0	0	0	0	0	0	0	0	0	0	0	0	0	0	0	0	0	0	0
0,-1,-1,2,-3	0	0	0	0	0	0	0	0	0	0	0	0	0	0	0	0	0	0	0.5	0	0
0,1,1,2,5	0	0	0	0	0	1	0	0	0	0	0	0	0	0	0	0	0	0	0	0	0
0,1,1,-2,-5	0	0	0.333333	0	0	0	0	0	0	0	0	0	0	1	0	0	0	0	0	0	0
0,1,-1,-2,-5	1	0	0	0	0	1	0	0	0	0	0	0	0	1	0	0	0	0	0	0	0
0,1,1,-2,-6	0	0	0	0	0	0	0	0	0	0	0	0	0	0	1	0	0	0	0	0	0
0,1,-1,-2,-6	0	1	0	0	0	0	0	0	0	0	0	0	0	0	0	0	0	0	0	0	0
0,1,1,-2,-7	0	0	0.666667	0	0	0	0	0	0	0	0	0	0	0	0	0	0	0	0	0	0
0,-1,-1,2,7	0	0	0	0	0	0	0	0	0	0	0	0	0	1	0	0	0	0	0	0	0
0,-1,-1,-22,-18	0	0	0	0	0	0	0	0	0	0	0	0	0	0	0	0	0	0	0	0	1
0,1,1,-3,-1	0	0.5	0	0	0	0	0	0	0	0	0	0	0	0	0	0	0	0	0	0	0
0,-1,-1,-3,-1	0	0	0	0	0	0	0	0	1	0	0.333333	0	0	0	0	0	0	0	0	0	0
0,1,1,-3,-2	0	0.5	0	0	0	0	0	0	0	0	0	0	0	0	0	0	0	0	0	0	0
0,1,-1,-3,-2	0	0	0	0.5	0	0	0	0	0	0	0	0	0	0	0	0	0	0	0	0	0
0,1,1,3,3	0	1	0	0	0	0	0	0	1	0	0	0	0	1	0	0	0	1	0	0	0
0,1,1,-3,-3	1	0	0	0	0	0	0	0	0	0	0	0	0	0	0	0	0	0	0	0	0
0,-1,-1,-3,-3	0	0	0	0	0	0	0	0	0	0	0.333333	0	0	0	0	0	0	0	0	0	0
0,1,1,3,4	0	0	0	0	0	0	0	0	0	0	0	0	0	0	0	0	0	0	0	1	0
0,1,-1,-3,4	0	0	0	0	0	0	0	0	0	0	0	0	0	0	0	1	0	0	0	0	0
0,1,-1,-3,-4	0	0	0	0.5	0	0	0	0	1	0	0	0	0	0	0	0	0	0	0	0	0
0,1,1,3,-5	0	0	0	0	1	0	0	0	0	0	0	0	0	0	0	0	0	0	0	0	0
0,-1,-1,-3,-5	0	0	0	0	0	0	0	0	0	0	0	1	0	0	0	0	0	0	0	0	0
0,1,1,3,6	0	0	0	0	0	0	0	0	0	0	0	0	0	0	0	1	0	0	0	0	0
0,1,1,-3,-6	0	0	1	0	0	0	0	0	0	0	0	0	1	0	0	0	0	0	0	0	0
0,1,-1,-3,-6	0	0	0	0	1	1	1	0	0	0	0	0	1	0	0	0	1	0	0	0	0
0,-1,1,3,6	0	0	1	0	0	0	0	0	0	0	0	0	0	0	1	0	0	0	0	0	0
0,-1,-1,-3,-6	0	0	0	0	0	0	0	0	0	0	0.333333	0	0	0	0	0	0	0	0	0	0
0,-1,-1,3,8	0	0	0	0	0	0	0	0	0	0	0	0	0	0	0	1	0	0	0	0	0
0,1,-1,4,1	0	0	0	0	0	0	0	0	0	0	1	0	0	0	0	0	0	0	0	0	0
0,-1,1,4,1	0	0	0	0	0	0	0	0	0	0	0	0	0	0	0	0	1	0	0	0	0
0,1,1,-4,-11	0	0	0.333333	0	0	0	0	0	0	0	0	0	0	0	0	0	0	0	0	0	0
0,1,-1,4,3	0	0	0	0	0	0	1	0	0	0	0	0	0	0	0	0	0	0	0	0	0
0,-1,-1,4,3	0	0	0	0	0	0	0	0	0	0	0	0	0	0	0	0	0	0	0	0	1
0,-1,-1,-4,-3	1	0	0	0	0	0	0	0	0	0	0	0	0	0	0	0	0	0	0	0	0
0,1,1,4,4	0	0	0	0	0	0	0	0	0	0	1	0	0	1	0	0	0	0	0	0	0
0,-1,-1,-4,-4	0	1	0	0	0	0	0	0	0	0	0	0	0	0	0	0	0	0	0	0	0
0,1,1,-4,-6	0	0	0.333333	0	0	0	0	0	0	0	0	0	0	0	0	0	0	0	0	0	0
0,1,1,-4,-8	0	0	0.333333	0	0	0	0	0	0	0	0	0	0	0	0	0	0	0	0	0	0
0,1,-1,-4,-8	0	0	0	1	1	0	0	0	0	0	0	0	0	0	0	0	0	0	0	0	0
0,-1,-1,-5,-1	0	0.5	0	0	0	0	0	0	0	0	0	0	0	0	0	0	0	0	0	0	0
0,-1,1,-5,-3	0	0	0	0	0	0	0	0	0	0	0	0	1	0	0	0	0	0	0	0	0
0,-1,-1,-5,-4	0	0.5	0	0	0	0	0	0	0	0	0	0	0	0	0	0	0	0	0	0	0
0,-1,1,5,7	0	0	1	0	0	0	0	0	0	0	0	0	0	0	0	0	0	0	0	0	0
0,1,1,5,8	1	0	0	0	0	0	0	0	0	0	0	0	0	0	0	0	0	0	0	0	0
0,-1,-1,-5,-8	0	0	0	0	0	0	0	0	0	0	0	0	0	0	0	0	0	1	0	0	0
0,-1,1,-6,-1	0	0	0	0	0	1	0	0	0	0	0	0	0	0	0	0	0	0	0	0	0
0,1,-1,-6,-10	0	1	0	0	0	0	1	0	0	0	0	0	0	0	0	0	0	0	0	0	0
0,-1,-1,6,4	0	0	0	0	0	0	0	0	0	0	0	0	1	0	0	0	0	0	0	0	0
0,1,1,6,7	0	0	0	0	0	0	0	0	0	0	0	0	0	1	0	0	0	0	0	0	0
0,1,1,-7,-5	0	0	0	1	0	0	0	0	0	0	0	0	0	0	0	0	0	0	0	0	0
0,1,1,-8,-5	0	0	0	0	0	0	0	0	0	0	0	0	0	1	0	0	0	0	0	0	0
0,-1,-1,-8,-5	0	0	0	0	0	0	0	0	0	0	0	0	1	0	0	0	0	0	0	0	0
0,1,1,-8,-6	0	0	0	1	0	0	0	0	0	0	0	0	0	0	0	0	0	0	0	0	0
0,-1,-10,-11,-8	0	0	0	1	0	0	0	0	0	0	0	0	0	0	0	0	0	0	0	0	0
0,-1,10,4,1	0	0	0	0	0	0	0	0	0	0	0	0	0	0	0	1	0	0	0	0	0
0,-1,-10,-5,-1	0	0	0	0	0	0	0	0	0	0	1	0	0	0	0	0	0	0	0	0	0
0,1,-10,-6,-2	0	0	0	0	0	0	0	0	0	0	0	0	1	0	0	0	0	0	0	0	0
0,-1,10,6,3	0	0	0	0	0	1	0	0	0	0	0	0	0	0	0	0	0	0	0	0	0
0,-1,-10,-6,-4	0	0	0	0	0	0	0	0	0	0	0	0	0	0	0	0	0	0	0	0	1
0,1,10,7,3	0	0	0	0	0	0	0	0	0	0	0	0	0	1	0	0	0	0	0	0	0
0,-1,10,7,6	0	0	0	0	0	0	0	0	0	0	0	0	0	1	0	0	0	0	0	0	0
0,-1,-10,-7,-6	0	0	0	0	0	1	0	0	0	0	0	0	0	0	0	0	0	0	0	0	0
0,1,10,9,4	0	0	0	0	0	0	1	0	0	0	0	0	0	0	0	0	0	0	0	0	0
0,-1,11,10,9	0	0	0	0	0	1	0	0	0	0	0	0	0	0	0	0	0	0	0	0	0
0,-1,11,11,12	0	0	0	0	0	0	0	0	0	0	1	0	0	0	0	0	0	0	0	0	0
0,1,11,11,9	0	0	0	0	0	0	0	0	0	0	1	0	0	0	0	0	0	0	0	0	0
0,1,-11,2,1	1	0	0	0	0	0	0	0	0	0	0	0	0	0	0	0	0	0	0	0	0
0,1,11,20,18	0	0	0	0	0	0	0	0	1	0	0	0	0	0	0	0	0	0	0	0	0
0,-1,11,7,4	0	0	0	0	1	0	0	0	0	0	0	0	0	0	0	0	0	0	0	0	0
0,1,-11,-7,-6	0	0	0	0	0	0	0	0	0	0	0	0	0	0	0	0	0	0	0	1	0
0,1,11,8,4	0	0	0	0	1	0	0	0	0	0	0	0	0	0	0	0	0	0	0	0	0
0,1,11,8,9	1	0	0	0	0	0	0	0	0	0	0	0	0	0	0	0	0	0	0	0	0
0,1,12,10,5	0	1	0	0	0	0	0	0	0	0	0	0	0	0	0	0	0	0	0	0	0
0,1,12,10,9	0	0	0	0	0	1	0	0	0	0	0	0	0	0	0	0	0	0	0	0	0
0,1,12,13,14	1	0	0	0	0	0	0	0	0	0	0	0	0	0	0	0	0	0	0	0	0
0,-1,-12,-15,-10	0	0	0	0	0	0	0	0	0	0	0	0	0	1	0	0	0	0	0	0	0
0,1,12,8,5	0	1	0	0	0	0	0	0	0	0	0	0	0	0	0	0	0	0	0	0	0
0,1,13,11,8	0	0	0	0	1	0	1	0	0	0	0	0	0	0	0	0	0	0	0	0	0
0,1,-13,-12,7	1	0	0	0	0	0	0	0	0	0	0	0	0	0	0	0	0	0	0	0	0
0,1,13,2,12	0	0	0	0	1	0	0	0	0	0	0	0	0	0	0	0	0	0	0	0	0
0,1,13,7,14	0	0	0	0	0	0	0	0	0	0	1	0	0	0	0	0	0	0	0	0	0
0,-1,-13,-8,-6	0	0	0	0	0	0	0	0	1	0	0	0	0	0	0	0	0	0	0	0	0
0,-1,13,9,5	0	0	0	0	1	0	0	0	0	0	0	0	0	0	0	0	0	0	0	0	0
0,-1,-14,-14,-2	0	0	0	0	0	0	0	0	0	0	0	0	0	0	0	0	0	0	0	0	1
0,1,-14,-16,1	0	0	0	0	0	0	0	0	0	0	0	0	0	0	0	0	0	0	0	1	0
0,1,15,15,16	0	0	1	0	0	0	0	0	0	0	0	0	0	0	0	0	0	0	0	0	0
0,1,-15,-7,-14	0	0	0	1	0	0	0	0	0	0	0	0	0	0	0	0	0	0	0	0	0
0,1,17,12,15	0	0	0	0	0	0	0	0	0	0	0	0	1	0	0	0	0	0	0	0	0
0,1,-18,-16,-14	0	0	0	0	0	0	0	0	0	0	0	0	0	0	0	1	0	0	0	0	0
0,1,18,18,16	0	0	0	0	0	0	0	0	0	0	0	0	0	0	0	0	0	0	0	0	1
0,1,2,0,1	0	0	0	0	0.333333	0	0	0	0	0	0	0	0	0	0	0	0	0	0	0	0
0,1,-2,0,1	0	0	0	1	0	0	0	0	0.333333	0	0	0	0	1	0	0	0	0	0	0	0
0,-1,2,0,-1	0	0.5	0	0	0	1	0	0	0	0	0	0	0	0	0	0	0	0	0	0	0
0,-1,2,0,11	0	0.5	0	0	0	0	0	0	0	0	0	0	0	0	0	0	0	0	0	0	0
0,1,2,0,2	0	0	0	0	0.333333	0	0	0	0	0	0	0	0	0	0	0	0	0	0	0	0
0,1,2,0,-2	0	0	0	0	0.333333	0	0	0	0	0	0	0	0	0	0	0	0	0	0	0	0
0,1,-2,0,-2	0.6	0	0	0	0	0	0	0	0	0	0	0	0	0	0	0	0	0	0	0	0
0,-1,-2,0,-2	0	0	0	0	0	0.5	0	0	0	0	0	0	0	0	0	0	0	0	0	0	0
0,1,-2,0,3	0	0	0	0	0	0	0	0	0	0	0	0	0	0	0.5	0	0	0	0	0	0
0,1,-2,0,-3	0.4	0	0	0	0	0	0	0	0	0	0	0	0	0	0	0	0	0	0	0	0
0,-1,2,0,3	0	0	1	0	0	0	0	0	0	0	0	0	0	0	0	0	0	0	0	0	0
0,-1,2,0,-3	1	0	0	0	0	0	0	0	0	0	0	0	0	0	0	0	0	0	0	0	0
0,1,-2,0,-4	0	0	0	0	0	0	0	1	0.666667	0	0	0	0	0	0	0	0	0	0	0	1
0,-1,2,0,4	0	0	0	0	0	0	0	0	0	0	0	0	0	0	0	0	0	0	0	0	1
0,1,2,0,5	0	0	0	0	0	0	0	0	0	0	1	0	0	0	0	0	0	0	0	0	0
0,1,-2,0,5	0	0	0	0	0	0	0	0	0	0	0	0	0	0	0.5	0	0	0	0	0	0
0,1,-2,0,-5	0	0	0	0	0	0	1	0	0	0	0	0	0	0	0	0	0	0	0	0	0
0,-1,2,0,-5	0	0	0	0	1	0	1	0	0	0	0	0	0	0	0	0	0	0	0	0	0
0,-1,-2,0,-6	0	0	0	0	0	0	0	0	0	0	0	0	1	0	0	0	0	0	0	0	0
0,-1,-2,0,-7	0	0	0	0	0	0.5	0	0	0	0	0	0	0	0	0	0	0	0	0	0	0
0,1,2,1,0	1	0.5	1	1	0	1	0	0	0	0	1	0	0	0	0	0	0	0	0	0	0
0,1,-2,1,0	1	0	0	0	0	0	0	0	0	0	0	0	0	0	0	0	0	0	0	0	0
0,1,-2,-1,0	1	0	0	0	0	0	0	0	0	0	0	0	0	0	0	0	0	0	0	0	0
0,-1,2,1,0	0	0	0	0	0	1	0	0	1	0	0	0	0	0	0	0	0	0	0	0	0
0,-1,2,-1,0	1	0	0	0	0	0	1	0	1	0	0	0	0	1	0	0	0	0	0	0	0.333333
0,-1,-2,1,0	0	0	0	0	0	0.2	0	0	1	0	0	0	0	0	0	0	0	0	0	0	0
0,-1,-2,-1,0	0	0	0	0.5	0	0	0	0	0	0	0.142857	0	0	0.666667	0	0	0	0	0	0	0
0,1,2,1,-1	0	0	0	0	0	0	0	0	0	0	0	0	0	0.5	0	0	0	0	0	0	0
0,1,-2,-1,1	0	0	0	0	0	0	0	0	0	0	0	0	0	0	0	1	0	0	0	0	0
0,-1,2,1,1	0	0	0	0	0	0	0	0	0	0	0	0	0	0	0	0	0	0	0	0	1
0,-1,-2,1,1	0	1	0	0	0	0	0	0	0	0	0	0	0	0	0	0	0	0	0	0	0
0,-1,-2,1,-1	0	0	0	0	0	0.2	1	0	0	0	0	0	0	0	0	0	0	0	0	0	0
0,-1,-2,-1,1	0	0	0	0	0	0	0.5	0	0	0	0	0	0	0	0	0	0	0	0	0	1
0,1,2,1,2	0	0.5	0	0	0	0	0	0	1	0	0	0	0	0.5	0	0	0	0	0	0	0
0,1,2,-1,2	0.5	0	0	0	0	0	0	0	0	0	0	0	0	0	0	0	0	0	0	0	0
0,1,2,-1,-2	0.5	0	0	0	0	0.75	0	0	0	0	0	0	0	0	0	0	0	0	0	0	0
0,1,-2,1,-2	0	0	0	0	0	0	0	0	0	0	1	0	0	0	0	0	0	0	0	0	0
0,-1,2,1,2	1	0	0	0	0	0	0	0	0	0	0	0	0	0	0	0	0	0	0	0	0
0,-1,2,1,-2	0	0	0	0	0	0	0	0	0	0	0	0	0	0	0	0	0	0	1	0	0
0,-1,2,-1,2	0	0	0	0	0	0	0	0	0	1	0	0	0	0	0	0	0	0	0	0	0.333333
0,-1,2,-1,-2	0	0	0	0	0	1	0	0	0	0	0	0	0	0	0	0	0	0	0	0	0
0,-1,-2,1,-2	0	0	0	0	0	0.4	0	0	0	0	0	0	0	0.333333	0	0	0	0	0	0	0
0,-1,-2,-1,-2	0	0	0	0	0	0	0.5	0	0	0	0.714286	0	0	0.333333	0	0	0	0	0	0	0
0,1,2,-1,-3	0	0	0	0	0	0	1	0	0	0	0	0	0	0	0	0	0	0	0	0	0
0,1,-2,-1,-3	0	0	0	1	0	0	0	0	0	0	1	0	0	0	0	0	0	0	0	0	0
0,-1,2,-1,3	0	0	0	0	0	0	0	0	0	0	1	0	0	0	0	0	0	0	0	0	0
0,-1,2,-1,-3	0	0	0	0	0	0	0	0	0	0	0	0	0	0	0	0	0	0	0	0	0.333333
0,-1,-2,-1,3	0	0	0	0	0	1	0	0	0	0	0	0	0	0	0	0	0	0	0	0	0
0,1,2,1,4	0	0	0	0	0	0	0	0	0	0	0	0	0	0	0	0	0	0	0	0	1
0,1,-2,-1,-4	0	0	0	0	0	0	0	0	0.5	0	0	0	0	0	0	0	0	0	0	0	0
0,-1,2,-1,4	0	0	0	0	0	0	0	0	0	0	0	0	0	0	0	0	0	0	1	0	0
0,-1,-2,1,4	0	0	0	0	0	0.2	0	0	0	0	0	0	0	0.333333	0	0	0	0	0	0	0
0,-1,-2,-1,-4	0	0	0	0.5	0	0	0	0	0	0	0.047619	0	0	0	0	0	0	0	0	0	0
0,1,2,-1,-5	0	0	0	0	0	0.25	0	0	0	1	0	0	0	1	0	0	0	0	0	0	0
0,-1,2,-1,-5	0	0	1	1	0	0	0	0	0	0	0	0	0	0	0	0	0	0	0	0	0
0,-1,-2,-1,-5	0	0.5	0	0	0	0	0	0	0	0	0	0	0	0	0	0	0	0	0	0	0
0,1,2,-1,-6	0	0	1	0	0	0	0	0	0	0	0	0	0	0	0	0	0	0	0	0	0
0,-1,2,-1,-6	0	0	0	0	0	0	0	0	0	0	0	0	0	0	0	0	0	1	0	0	0
0,-1,-2,1,6	0	0	0	0	0	0	0	0	0	0	0	0	0	0.333333	0	0	0	0	0	0	0
0,-1,-2,-1,-6	0	0.5	0	0	0	0	0	0	0	0	0	0	0	0	0	0	0	0	0	0	0
0,-1,-2,-1,7	0	0	0	0	0	0	0	0	0	0	0.047619	0	0	0	0	0	0	0	0	0	0
0,1,-2,-1,-9	0	0	0	0	0	0	0	0	0.5	0	0	0	0	0	0	0	0	0	0	0	0
0,-1,-2,-1,9	0	0	0	0	0	0	0	0	0	0	0.047619	0	0	0	0	0	0	0	0	0	0
0,-1,-2,10,10	0	0	0	0	0	0	0	0	0	0	1	0	0	0	0	0	0	0	0	0	0
0,1,-2,10,15	1	0	0	0	0	0	0	0	0	0	0	0	0	0	0	0	0	0	0	0	0
0,-1,-2,-10,-3	0	0	0	0	0	0	1	0	0	0	0	0	0	0	0	0	0	0	0	0	0
0,1,2,10,5	0	0	0	0	1	0	0	0	0	0	0	0	0	0	0	0	0	0	0	0	0
0,-1,-2,10,6	0	0	0	0	1	0	0	0	0	0	0	0	0	0	0	0	0	0	0	0	0
0,-1,-2,-10,-7	0	0	0	1	0	1	0	0	0	0	0	0	0	0	0	0	0	0	0	0	0
0,-1,-2,10,9	0	0	0	0	0	1	0	0	0	0	0	0	0	0	0	0	0	0	0	0	0
0,-1,2,12,14	0	0	0	0	0	0	0	0	0	0	0	0	0	0	0	0	0	1	0	0	0
0,-1,-2,12,8	0	0	0	0	1	0	0	0	0	0	0	0	0	0	0	0	0	0	0	0	0
0,1,2,12,9	1	0	0	0	0	0	0	0	0	0	0	0	0	0	0	0	0	0	0	0	0
0,1,2,14,12	0	0	0	0	0	0	1	0	0	0	0	0	0	0	0	0	0	0	0	0	0
0,-1,2,19,18	0	0	0	0	0	0	0	0	0	0	0	0	0	0	0	0	0	0	0	0	1
0,1,2,2,0	0	0	0	0	0	0	0	0	0	0	0	0	0	0.166667	0	0	0	0	0	0	0
0,-1,2,2,0	0	1	0	0	0	0	1	0	0	0	0	0	0	0	0	0	0	1	0	0	0
0,-1,-2,2,0	0	0	0	0	0	0	0	0	0.666667	0	0	0	0	1	0	0	0	0	0	0	0
0,1,2,2,1	0	0	0	0	0	0	0	0	0	0	0	0	0	0.666667	0	0	0	0	0	0	0
0,1,2,2,-1	0	0	0	0	0	0	0	0	0	0	0	0	0	0.166667	0	0	0	0	0	0	0
0,1,2,-2,-1	0	0	0	0	0	0	0	0	0	0	0	0	0.5	0	0	0	0	0	0	0	0
0,-1,-2,2,1	0	0	0	0	0	0	0	0	0.166667	0	0	0	0	0	0	0	0	0	0	0	0
0,-1,-2,-2,1	0.5	0	0	0	0	0	0	0	0	0	0	0	0	0	0	0	0	0	0	0	0
0,-1,-2,-2,-1	0	0	1	0	0	0	1	0	0	0	0	0	0	0	0	0	0	0	0	0	0
0,1,2,-2,10	0	0	0	1	0	0	0	0	0	0	0	0	0	0	0	0	0	0	0	0	0
0,-1,-2,2,10	0	0	0	0	0	0	0.5	0	0	0	0	0	0	0	0	0	0	0	0	0	0
0,1,2,2,2	0	1	0	0	0	0	0	0	0	0	0	0	0	0	0	0	0	0	0	0	0
0,-1,2,2,2	0	0	0	0	0	0	0	0	0	0	0	0	0	0	0	1	1	0	0	0	1
0,-1,-2,2,2	1	0	0	0	0	0	0	0	0	0	0	0	0	0	0	0	0	0	0	0	0
0,-1,-2,-2,-2	0	0	0	0	0	0	0	0	1	0	0.5	0	1	0	0	0	0	0	0	0	0
0,1,2,2,3	0	0	0	0	0	0	0	0	0	0	0	0	1	0	0	0	0	0	0	0	0
0,-1,-2,2,-3	0	0	0	0	0	0.666667	0.5	0	0	1	1	0	0	0	0	0	0	0	0	0	0
0,1,2,-2,-4	0	0	0	0	0	0	0	0	0	0	0	0	0	0	1	0	0	0	0	0	0
0,-1,-2,-2,-4	0	0	0	0	0	0	0	0	0	0	0.5	0	0	0	0	0	0	0	0	0	0
0,1,2,-2,-5	0	0	1	0	0	0	0	0	0	0	0	0	0.5	0	0	0	0	0	0	0	0
0,-1,-2,2,5	0	0	0	1	0	0.333333	0	0	0.166667	0	0	0	0	0	0	0	0	0	0	0	0
0,-1,-2,-2,-5	0.5	0	0	0	0	0	0	0	0	0	0	0	0	0	0	0	0	0	0	0	0
0,1,2,2,-7	0	0	0	1	0	0	0	0	0	0	0	0	0	0	0	0	0	0	0	0	0
0,1,2,-2,-7	0	0	0	0	0	1	0	0	0	0	0	0	0	0	0	0	0	0	0	0	0
0,1,-2,24,25	0	0	0	0	0	0	0	0	0	0	0	0	0	0	1	0	0	0	0	0	0
0,1,2,3,0	0	0	0	0	0	0.0833333	1	0	0	0	0	0	0	0.5	0	0	0	0	0	0	0
0,-1,-2,3,0	1	0	0	0	0	1	0	0	0	0	0	0	0	0	0	0	0	0	0	0	0
0,-1,-2,-3,0	0	0.0555556	0	0	0	0.0666667	0.0416667	0	0.6	0	0	0	0	0.125	0	0	0	0	0	0	0
0,1,2,3,1	0	0	0	0	0	0	0	0	0	0	0.125	0	0	0	0	0	0	0	0	0	0
0,1,2,3,-1	0	0	0	0.142857	0	0	0	0	0	0	0	0	0	0	0	0	0	0	0	0	0
0,1,2,-3,-1	0	0	0	0	0	0	0	0	0	0	1	0	0	0	0	0	0	0	0	0	0
0,1,-2,3,1	0	0	0	0	0	0	0	0	0	0	0	0	0	0	0	0	0	0	1	0	0
0,-1,2,-3,-1	0	0	0	0	0	0	0	0	0	1	0	0	0	0	0	0	0	0	0	0	0
0,-1,-2,-3,1	0.111111	0	0	0	0	0.05	0.0416667	0	0.25	0.285714	0.0357143	0	0	0	0	0	0	0	0	0	0
0,-1,-2,-3,-1	0	0	0	0	0	0.0333333	0	0	0	0	0	0	0.125	0	0	0	0	0	0	0	0
0,-1,2,3,10	0	0	0	0	0	0	0	0	0	0	0	0	0	0	0	1	0	0	0	0	0
0,-1,2,-3,-10	0	0	0	0	0	0	0	0	0	0	0	1	0	0	0	0	0	0	0	0	0
0,1,2,3,11	0	0	0	0	0.25	0	0	0	0	0	0	0	0	0	0	0	0	0	0	0	0
0,-1,-2,-3,-11	0	0	0	0.166667	0	0.0166667	0.0416667	0	0	0	0	0	0	0	0	0	0	0	0	0	0
0,1,2,3,2	0.25	0.1	0	0	0	0.25	0	0	0	0	0.625	0	0	0	0	0	0	0	0	0	0
0,1,-2,3,2	0	0	0	0	0	0	0	0	0	0	0	0	0	0	0	0	1	0	0	0	0
0,1,-2,-3,-2	0.6	0	1	0	0	0.333333	0	0	0	0	0	0	0	0	0	0	0	0	0	0	0
0,-1,2,3,2	0	0	0	0	0	0	0	0	0	0	1	0	0	0	0	0	0	0	0	0	0
0,-1,-2,3,2	0	0	0	0	0	0	0	0	1	0	0	0	0	0	0	0	0	0	0	0	0
0,-1,-2,-3,2	0	0	0	0	0	0.0166667	0	0	0.1	0	0	0	0	0	0	0	0	0	0	0	0
0,-1,-2,-3,-2	0	0.0555556	0	0.166667	0	0.0166667	0.0833333	0	0	0	0.178571	0	0	0.25	0	0	0	0	0	0	0
0,1,2,3,-3	0	0	0	0	0	0	0	0	0	0	0.125	0	0	0	0	0	0	0	0	0	0
0,1,-2,-3,-3	0	0.333333	0	0	0	0.166667	0	0	0	0	0	0	0	0	0	0	0	0	0	0	0
0,-1,2,-3,-3	0.333333	0	0	0	0	0	0	0	0	0	0	0	0	0	0	0	0	0	0	0	0
0,-1,-2,-3,-3	0.222222	0	0.5	0	0	0	0.0416667	0	0	0	0.0714286	0	0	0	0	0	0	0	0	0	0
0,1,2,3,4	0.25	0.8	0	0.571429	0.25	0.666667	0	0	0	0	0.125	0	1	0.5	0	0	0	0	0	0	0
0,1,-2,3,4	0	0	0	0	0	0	0	0	0	0	0	0	0	1	0	0	0	0	0	0	0
0,1,-2,-3,-4	0.2	0.333333	0	0	0	0.333333	0	0	0	0	0	0	0	0	0	0	0	0	0	0	0
0,-1,-2,-3,4	0	0	0	0	0	0	0	0	0.05	0	0	0	0	0	0	0	1	0	0	0	0
0,-1,-2,-3,-4	0.333333	0.666667	0.5	0.5	0.5	0.566667	0.416667	0	0	0.571429	0.464286	0	0.375	0.25	0	0	0	0	0	0	0
0,1,2,3,5	0.5	0	0	0	0	0	0	0	0	1	0	0	0	0	0	0	0	0	0	0	1
0,1,-2,-3,5	0	0	0	0.5	0	0	0.25	0	0	0	0	0	0	0	0	0	0	0	0	0	0
0,1,-2,-3,-5	0.2	0.333333	0	0.5	0	0.166667	0.5	0	0	0	1	0	0	0	0	0	0	0	0	0	0
0,-1,2,3,5	0	0	0	0	0	0	1	0	0	0	0	0	0	0	0	0	0	0	0	0	0
0,-1,2,-3,-5	0.666667	0	0	0	0	0	0	0	0	0	0	0	0	0	0	0	0	0	0	0	0
0,-1,-2,-3,-5	0.111111	0.222222	0	0.166667	0	0.0666667	0.0833333	0	0	0.142857	0.178571	0	0.375	0.25	0	0	0	0	0	0	0
0,1,2,3,6	0	0	0	0.142857	0.25	0	0	0	0	0	0	0	0	0	0	0	0	0	0	0	0
0,1,-2,-3,-6	0	0	0	0	0	0	0.25	0	0	0	0	0	0	0	0	0	0	0	0	0	0
0,-1,2,-3,-6	0	0	0	0	0	0	0	0	1	0	0	0	0	0	0	0	0	0	0	0	0
0,-1,-2,-3,-6	0.222222	0	0	0	0.5	0.0833333	0.208333	0	0	0	0.0357143	0	0.125	0	0	0	0	0	0	0	0
0,1,2,3,7	0	0	0	0.142857	0	0	0	0	0	0	0	0	0	0	0	0	0	0	0	0	0
0,-1,-2,3,7	0	0	0	0	0	0	1	0	0	0	0	0	0	0	0	0	0	0	0	0	0
0,-1,-2,-3,7	0	0	0	0	0	0.0166667	0	0	0	0	0	0	0	0	0	0	0	0	0	0	0
0,-1,-2,-3,-7	0	0	0	0	0	0.0333333	0.0416667	0	0	0	0	0	0	0.125	0	0	0	0	0	0	0
0,1,2,3,8	0	0.1	0	0	0.25	0	0	0	0	0	0	0	0	0	0	0	0	0	0	0	0
0,-1,-2,-3,-8	0	0	0	0	0	0.0166667	0	0	0	0	0	0	0	0	0	0	0	0	0	0	0
0,-1,-2,-3,9	0	0	0	0	0	0.0166667	0	0	0	0	0.0357143	0	0	0	0	0	0	0	0	0	0
0,-1,-2,-4,0	0	0	0	0	0	0	0	0	0.5	0	0	0	0	0	0	0	0	0	0	0	0
0,-1,-2,-4,1	0	0	0	0	0	0	0	0	0.5	0	0	0	0	0	0	0	0	0	0	0	0
0,-1,-2,-4,-1	0	0	0	0	0	0	0	0	0	0	0	0	0	0.333333	0	0	0	0	0	0	0
0,1,2,4,-17	0	0	0	0	0	0	0	0	0	0	0	0	0	0	0	0	0	0	0	0	1
0,-1,-2,-4,-17	0	0	0	0.5	0	0	0	0	0	0	0	0	0	0	0	0	0	0	0	0	0
0,1,2,4,2	0	0	0	1	0	0	0	0	0	0	0	0	0	0	0	0	0	0	0	0	0
0,-1,-2,-4,2	0	0	0	0	0	0	0	0	0	0	0	0	0	0.333333	0	0	0	0	0	0	0
0,-1,-2,-4,-2	0	0	0	0.5	0	0	0	0	0	0	0	0	0.2	0	0	0	0	0	0	0	0
0,1,-2,-4,-3	0	0	0	1	0	0	0	0	0	0	0	0	0	0	0	0	0	0	0	0	0
0,-1,-2,4,3	0	0	0	0	0	0	0	0	0	0	0	0	0	0	0	0	1	0	0	0	0
0,-1,-2,-4,3	0	0	0	0	0	0	0	0	0	0	0.2	0	0	0	0	0	1	0	0	0	0
0,-1,-2,-4,-3	0	0.166667	0	0	0	0.3	0.125	0	0	0	0.2	0	0	0	0	0	0	0	0	0	0
0,-1,2,4,4	0	0	0	0	0	0	0	0	0	0	0	0	0	0	0	0	0	1	0	0	0
0,-1,-2,-4,-4	0.333333	0	0	0	0	0	0	0	0	0	0	0	0	0	0	0	0	0	0	0	0
0,1,2,4,5	0	0.5	0	0	0	0	1	0	0	0	0	0	0	1	0	0	0	0	0	0	0
0,1,-2,-4,-5	0	0	0	0	0	0	1	0	0	0	0	0	0	0	0	0	0	0	0	0	0
0,-1,-2,4,5	0	0	0	0	0	0	0	0	1	0	0	0	0	0	0	0	0	0	0	0	0
0,-1,-2,-4,-5	0.333333	0.666667	0	0	0	0.5	0.5	0	0	0	0.4	0	0.4	0.333333	0	0	0	0	0	0	0
0,1,2,4,6	1	0.5	0	0	0	0	0	0	0	1	1	0	0	0	0	0	0	0	0	0	0
0,1,-2,-4,-6	0	0	0	0	0	0	0	0	1	0	0	0	0	0	0	0	0	0	0	0	0
0,-1,-2,-4,-6	0	0.166667	0	0	0	0	0	0	0	1	0.2	0	0.4	0	0	0.5	0	0	0	0	0
0,1,2,-4,-7	0	0	0	0	0	0	0	0	0	0	1	0	0	0	0	0	0	0	0	0	0
0,-1,2,4,7	0	0	0	0	0	1	0	0	0	0	0	0	1	0	0	0	0	0	0	0	0
0,-1,-2,-4,-7	0.333333	0	0	0	0	0.2	0.125	0	0	0	0	0	0	0	0	0.5	0	0	0	0	0
0,-1,-2,-4,-8	0	0	0	0	0	0	0.125	0	0	0	0	0	0	0	0	0	0	0	0	0	0
0,-1,-2,-4,-9	0	0	0	0	0	0	0.125	0	0	0	0	0	0	0	0	0	0	0	0	0	0
0,1,2,5,0	0	0	0	0	0	0.166667	0	0	0	0	0	0	0	0	0	0	0	0	0	0	0
0,1,-2,-5,0	0	0	0	0	0	0	0	0	0	0	0	0	0	0	1	0	0	0	0	0	0
0,-1,2,5,0	0	0	0	0	0	0	0.5	0	0	0	0	0	0	0	0	1	0	0	0	0	0
0,-1,2,-5,0	0	0	0	0	0	0	0	0	0	0	0	0	0	0	0.5	0	0	0	0	0	0
0,1,2,5,10	0.5	0	0	0	1	0	0	0	0	0	0	0	0	0	0	0	0	0	0	0	0
0,-1,-2,-5,10	0	0	0	0.333333	0	0	0	0	0	0	0	0	0	0	0	0	0	0	0	0	0
0,1,2,5,12	0	0	0	0	0	0.166667	0	0	0	0	0	0	0	0	0	0	0	0	0	0	0
0,1,2,5,2	0.5	0	0	0	0	0.166667	0	0	0	0	0	0	0	0	0	0	0	1	0	0	0
0,1,-2,-5,-2	0	0	1	0	0	0	0	0	0	0	0	0	0	0	0	0	0	0	0	0	0
0,-1,2,-5,2	0	0	0	0	0	0	0	0	0	0	0	0	0	0	0	0	0	0	0	0	1
0,-1,-2,-5,-2	0	0	0	0	0	0.2	0	0	0	0	0	0	1	0	0	0	0	0	0	0	0
0,1,2,5,3	0	0	0	0.333333	0	0	0	0	0	0	0	0	0	0	0	0	0	0	0	0	0
0,1,2,-5,-3	1	0	0	0	0	0	0	0	0	0	0	0	0	0	0	0	0	0	0	0	0
0,-1,2,-5,-3	0	0	0	0	0	0	0	0	0	0	0	0	0	0	0.5	0	0	0	0	0	0
0,-1,-2,-5,3	0	0	0	0	0	0	0	0	0	0	0	0	0	1	0	0	0	0	0	0	0
0,-1,-2,-5,-3	0.5	0	0	0	0	0.2	0.142857	0	0	0	0	0	0	0	0	0	0	0	0	0	0
0,1,2,5,4	0	0	0	0.666667	0	0.333333	0	0	0	0	0	0	0	0	0	0	0	0	0	0	0
0,1,2,-5,-4	0	1	0	0	0	0	0	0	0	0	0	0	0	0	0	0	0	0	0	0	0
0,1,-2,-5,-4	0	0	0	1	0	0	0	0	0	0	0	0	0	0	0	0	0	0	0	0	0
0,-1,2,5,4	0	0	0	1	0	0	0	0	0	0	0	0	0	0	0	0	0	0	0	0	1
0,-1,-2,5,4	0	0	0	0	0	0	0	0	1	0	0	0	0	0	0	0	0	0	0	0	0
0,-1,-2,-5,-4	0.25	0	0	0	0	0.2	0	0	0	0	0	0	0	0	0	0	0	0	0	0	0
0,1,2,5,5	0	0	0	0	0	0	0	0	0	0	0.75	0	0	0	0	0	0	0	0	0	0
0,-1,2,5,5	0	0	0	0	0	0	0	0	0	0	1	0	0	0	0	0	0	0	0	0	0
0,-1,-2,5,5	0	0	0	0	0	0	0	0	0	0	0	0	0	0	0	0	1	0	0	0	0
0,1,2,5,6	0	0	0	0	0	0.166667	0	0	0	0	0	0	0	0	0	0	0	0	0	0	0
0,1,-2,-5,-6	0	0	0	0	0	0	0	0	0	0	0	0	1	0	0	0	0	0	0	0	0
0,-1,2,5,6	0	0	0	0	0	0	0	0	0	0	0	0	0	0	0	0	1	0	0	0	0
0,-1,-2,-5,-6	0	0	0	0	0	0	0.142857	0	0	0	0	0	0	0	0	0	0	0	0	0	0
0,1,2,5,7	0	0	0	0	0	0	0	0	0	0	0	0	0	0	0	0	0	0	0	1	0
0,1,-2,-5,-7	1	0	0	0	0	0	0	0	0	0	0	0	0	0	0	0	0	0	0	0	0
0,-1,2,5,7	0	0	0	0	0	1	0	0	0	0	0	0	0	1	0	0	0	0	0	0	0
0,-1,-2,5,7	0	0	0	0	0	0	0	0	0	0	0	0	0	0	0	1	0	0	0	0	0
0,1,2,5,8	0	1	0	0	0	0	0	0	0	0	0.125	0	0	0	0	0	0	0	0	0	0
0,1,2,5,9	0	0	0	0	0	0	1	0	0	0	0.125	0	0	0	0	0	0	0	0	0	0
0,-1,2,5,9	0	0	0	0	0	0	0.5	0	0	0	0	0	0	0	0	0	0	0	0	0	0
0,-1,-2,-5,9	0	0	0	0.333333	0	0	0	0	0	0	0	0	0	0	0	0	0	0	0	0	0
0,-1,-2,-5,-9	0.25	1	0	0.333333	1	0.4	0.714286	0	0	0	1	0	0	0	0	0	0	0	0	0	0
0,-1,2,-6,-1	0	0	0	0	0	0	0	0	0	0	0	0	0	1	0	0	0	0	0	0	0
0,1,2,6,10	0	0	0	0	0	1	0	0	0	0	0	0	0	0	0	0	0	0	0	0	0
0,1,-2,-6,-10	0	0	0	0	0	0	0	0	0	0	0	0	1	0	0	0	0	0	0	0	0
0,-1,2,6,10	0	0	0	0	0	0	0	0	0	0	0	0	0	0	0	0	0	0	0	0	1
0,-1,-2,-6,-10	0	0	0	0	0	1	0.5	0	0	0	0	0	0	0	0	0	0	0	0	0	0
0,1,2,6,2	0	0	0	0	0	0	0	0	0	0	0	0	0	1	0	0	0	0	0	0	0
0,1,-2,-6,-2	0	0	0	0	0	0	0	0	0	0	0	0	0	0	0	0	0	0	1	0	1
0,-1,-2,6,2	0	0	0	0	0	0	0	0	0	0	0	0	0	1	0	0	0	0	0	0	0
0,1,-2,-6,-4	0	1	0	0	0	0	0	0	0	0	0	0	0	0	0	0	0	0	0	0	0
0,1,-2,-6,-5	0.5	0	0	0	0	0	0	0	0	0	0	0	0	0	0	0	0	0	0	0	0
0,-1,-2,-6,-5	0	0	0	0	0	0	0.5	0	0	0	0	0	0	0	0	0	0	0	0	0	0
0,-1,-2,6,6	0	0	0	1	0	0	0	0	0	0	0	0	0	0	0	0	0	0	0	0	0
0,-1,-2,-6,-6	0	0	0	0	0	0	0	0	0	0	0	0	0	1	0	0	0	0	0	0	0
0,1,-2,6,7	1	0	0	0	0	0	0	0	0	0	0	0	0	0	0	0	0	0	0	0	0
0,-1,-2,-6,-7	0	0	0	0	0	0	0	0	0	1	0	0	0	0	0	0	0	0	0	0	0
0,1,2,6,9	0	0	0	1	0	0	0	0	0	0	0	0	0	0	0	0	0	0	0	1	0
0,1,-2,-6,-9	0.5	0	0	0	1	1	0	0	0	1	0	0	0	1	0	0	0	0	0	0	0
0,-1,2,6,9	0	0	0	0	0	0	1	0	0	0	0	0	0	0	0	0	0	0	0	0	0
0,1,2,7,-1	0	0	0	0	1	0	0	0	0	0	0	0	0	0	0	0	0	0	0	0	0
0,1,-2,-7,-11	1	0	1	0	0	0	0	0	0	0	0	0	0	0	0	0	0	0	0	0	0
0,-1,2,7,11	0	0	0	0	0	0	0	0	0	0	0	0	0	1	0	0	0	0	0	0	0
0,1,2,-7,-2	0	0	0	1	0	0	0	0	0	0	0	0	0	0	0	0	0	0	0	0	0
0,-1,2,7,3	0	0	0	0	0	0	0	0	0	1	0	0	0	0	0	0	0	0	0	0	0
0,1,2,7,5	0	1	0	0.5	0	0	0	0	0	0	0	0	0	0	0	0	0	0	0	0	0
0,1,2,7,6	0	0	0	0.5	0	0	0	0	0	0	0	0	0	0	0	0	0	0	0	0	0
0,-1,-2,-7,-6	0	0	0	0	0	1	0	0	0	0	0	0	0	0	0	0	0	0	0	0	0
0,1,2,7,9	0	0	0	0	0	0	1	0	0	0	0	0	0	0	0	0	0	0	0	0	0
0,1,-2,-7,-9	0	0	0	0	0	0	0	0	0	0	0	0	0	0	1	0	0	0	0	0	0
0,-1,2,7,9	0	0	0	0	0	1	0	0	0	0	0	0	0	0	0	0	0	0	0	0	0
0,1,-2,-8,-4	0	0	0	0	0	0	0	0	0	0	0	0	0	0	0	1	0	0	0	0	0
0,-1,-2,8,4	0	0	0	0	0	1	0	0	0	0	0	0	0	0	0	0	0	0	0	0	0
0,-1,2,9,6	0	0	0	0	0	1	0	0	0	0	0	0	0	0	0	0	0	0	0	0	0
0,1,20,17,14	1	0	0	0	0	0	0	0	0	0	0	0	0	0	0	0	0	0	0	0	0
0,1,23,20,16	0	0	1	0	0	0	0	0	0	0	0	0	0	0	0	0	0	0	0	0	0
0,1,-23,-20,-23	0	0	0	0	0	0	0	0	0	0	0	0	0	0	0	0	0	0	0	1	0
0,-1,-26,-24,-19	0	0	0	0	0	0	0	0	0	0	0	0	0	0	0	0	0	0	1	0	0
0,-1,-3,0,0	0	0	0	0.5	0	0	0	0	0	0	0	1	0	0	0	0	0	0	0	0	0
0,1,3,0,1	1	0	0	0	0	0	0	0	0.5	0	0	0	0	1	0	0	0	0	0	0	0
0,1,3,0,-1	0	0	0	1	0	0.5	0	0	0	0	0	0	0	0	0	0	0	0	0	0	0
0,1,-3,0,-1	0	0	0	0	0	0	1	0	0	0	0	0	0	0.5	0	0	0	0	0	0	0
0,-1,-3,0,-1	0	0	0	0	0	0	0	0	0	0	1	0	0	0	0	0	0	0	0	0	1
0,1,3,0,2	0	0	0	0	0	0	0	0	0.5	0	0	0	0	0	0	0	0	0	0	0	0
0,1,3,0,-2	0	0	0	0	0	0.5	0	0	0	0	0	0	0	0	0	0	0	0	0	0	0
0,1,-3,0,-2	0	0	0	0	0	0	0	0	0	0	0	0	0	0.5	0	0	0	0	0	0	0
0,-1,-3,0,-2	0	0	0	0	0	0	0	0	0	0	0	0	0.5	0	0	0	0	0	0	0	0
0,1,3,0,-3	0	0	0	0	0	0	0	0	0	0.5	0	0	0	0	0	0	0	0	0	0	0
0,1,3,0,-4	0	0	1	0	0	0	0	0	0	0.5	1	0	0	0	0	1	0	0	0	0	0
0,-1,-3,0,-4	0	0	0	0.5	0	0	0	0	0	0	0	0	0	0	0	0	0	0	0	0	0
0,-1,3,0,-5	0	0	0	0	0	0	0	0	0	0	0	0	0	1	0	0	0	0	0	0	0
0,-1,-3,0,-5	0	0	0	0	0	0	0	0	0	0	0	0	0.5	1	0	0	0	0	0	0	0
0,1,3,0,7	0	0	0	0	0	0	0	0	0	0	0	0	0	0	0	0	0	0	1	0	0
0,1,3,1,0	1	0.666667	0	1	1	1	1	0	0	0	0	0	0	1	0	0	0	0	0	0.5	0
0,1,-3,1,0	0	0	0	0	0	0	0	0	0	0	0	0	0	1	0	0	0	0	0	0	0
0,-1,3,1,0	0	0	0	0	0	0	0	0	1	0	0	0	0	1	0	1	0	0	0	0	0
0,-1,-3,1,0	0	0	0	0	0	0	0	0	1	0	0	0	0	0	0	0	1	0	0	0	0
0,-1,-3,-1,0	0	0.333333	0	0	0	0	0.25	0	0	0	0	0	0	0	0	0	0	0	0	0	0
0,1,3,1,1	0	0	0	0	0	0	0	0	0	0	0	0	0	0	0	0	0	1	0	0	0
0,1,3,-1,1	0	0	0	0	0	0	0	0	0	0	0	0	0	0	0	1	0	0	0	0	0
0,1,-3,-1,1	0	0	0	0	1	0	0	0	0	0	0	0	0	0	0	0	0	0	0	0	0
0,-1,-3,1,-1	0	0	0	0	0	0	0	0	0	0	1	0	0	0	0	0	0	0	0	0	0
0,-1,-3,-1,-1	0	0	0	0.5	0	0	0	0	0	0	1	0	0	0	0	1	0	0	0	0	0
0,1,3,1,-2	0	0	0	0	0	0	0	0	0	0	0	0	1	0	0	0	0	0	0	0	0
0,1,-3,1,2	0	0	0	0	0	0	0	0	0	0	0	0	1	0	0	0	0	0	0	0	0
0,-1,3,1,2	0	0	0	0	0	0	0	0	0	0	1	0	0	0	0	0	0	0	0	0	0
0,-1,-3,-1,2	0	0	0	0	0	0	0	0	0	0	0	0	0	0	0	0	1	0	0	0	0
0,1,3,1,3	0	0.333333	1	0	0	0	0	0	0	0	0	0	0	0	0	0.333333	0	0	0	0.5	1
0,1,3,1,-3	0	0	0	0	0	0	0	0	0	0	0	0	0	0	0	0.333333	0	0	0	0	0
0,1,-3,1,3	0	0	0	0	0	0	0	0	0	0	0	0	0	0	0	0	0	0	0	0	1
0,-1,-3,-1,-3	0	0.333333	0	0.5	1	0	0.75	0	1	0	0	1	1	0	0	0	0	0	0	0	1
0,1,3,1,-4	0	0	0	0	0	0	0	0	1	0	0	0	0	0	0	0	0	0	0	0	0
0,1,3,-1,-4	0	1	0	0	0	0	0	0	0	0	0	0	0	0	0	0	0	0	0	0	0
0,1,-3,-1,4	0	0	0	0	0	0	0	0	0	0	0	0	0	0	0	0	0	0	0	0	1
0,1,3,1,5	0	0	0	0	0	0	0	0	0	0	0	0	0	0	0	0.333333	0	0	0	0	0
0,1,-3,1,5	0	0	0	0	0	1	0	0	0	0	0	0	0	0	0	0	0	0	0	0	0
0,-1,-3,-1,-5	0	0.333333	0	0	0	0	0	0	0	0	0	0	0	0	0	0	0	0	0	0	0
0,-1,-3,-1,-6	1	0	0	0	0	0	0	0	0	0	0	0	0	0	0	0	0	0	0	0	0
0,-1,3,-1,9	0	0	0	0	0	0	0	0	0	0	0	0	0	0	0	0	0	0	0	0	1
0,1,3,10,10	0	0	0	0	0	0	0	0	1	0	0	0	0	0	0	0	0	0	0	0	0
0,-1,-3,10,7	0	0	0	0	1	0	0	0	0	0	0	0	0	0	0	0	0	0	0	0	0
0,-1,-3,10,8	0	1	0	0	0	1	0	0	0	0	0	0	0	0	0	0	0	0	0	0	0
0,-1,-3,-11,-3	0	0	0	0	0	0	0	0	0	0	0	0	0	0	0	1	0	0	0	0	0
0,-1,3,11,6	0	0	0	0	0	0	1	0	0	0	0	0	0	0	0	0	0	0	0	0	0
0,-1,-3,-12,-4	0	0	0	0	0	0	0	0	0	0	0	0	0	0	0	0	1	0	0	0	0
0,1,3,-12,-7	0	1	0	0	0	0	0	0	0	0	0	0	0	0	0	0	0	0	0	0	0
0,-1,-3,-16,-12	0	0	0	1	0	0	0	0	0	0	0	0	0	0	0	0	0	0	0	0	0
0,1,3,-18,-14	0	0	0	0	0	0	0	0	0	0	0	0	0	0	0	0	0	0	0	0	1
0,1,3,2,0	0	0	0	0	0	0	0	0	0	0	0.5	0	0	0	0	0	0	0	0	0	0
0,1,3,-2,0	0	0	0	0	0	0	0	0	0	0	1	0	0	0	0	0	0	0	0	0	0
0,1,-3,-2,0	0.5	0	0	0.666667	0.333333	1	0	0	0	0	0	0	0	0	0	0	0	0	0	0	0
0,-1,-3,2,0	0	0.8	0	0	0	1	0	0	0	0	1	0	0	0	0	0	0	0.5	0	0.5	0.666667
0,1,3,2,1	0	0	0	0	0	0	0	0	1	1	0.5	0	0	0	0	0	0	0	0	0	0
0,1,-3,-2,1	0	0	0	0	0.333333	0	0	0	0	0	0	0	0	0	0	0	0	0	0	0	0
0,1,-3,-2,-1	0	0	0	0	0	0	0	0	0	0	0	0	1	0	0	0	0	0	0	0	0
0,-1,3,2,1	0	0	0	0	0	0	0	0	1	0	0	0	0	0	0	0	0	0	0	0	0
0,-1,3,-2,1	0	0	0	0	0	0	0	0	0	0.5	0	0	0	0	0	0	0	0	0	0	0
0,-1,-3,2,1	0	0	0	0	0	0	0	0	1	0	0	0	0	0	0	0	0	0	0	0	0
0,-1,-3,2,-1	0	0	0	0	0	0	0	0	0	0	0	0	0	0	0	0	1	0	0	0	0.333333
0,-1,-3,-2,1	0	0	0	0	0	0.333333	0	0	0	0	0	0	0	0	0	0	0	0	0	0	0
0,-1,-3,-2,-1	0	0	0	0	0	0	0.333333	0	0	0	1	0	0	0	0	0	0	0	0	0	0
0,-1,-3,-2,-10	0	0	0	0	0	0.166667	0	0	0	0	0	0	0	0	0	0	0	0	0	0	0
0,1,3,-2,-14	0	0	0	0	0	0	0	0	0.2	0	0	0	0	0	0	0	0	0	0	0	0
0,1,-3,-2,-2	0	0	0	0	0.333333	0	0	0	0	0	0	0	0	0	0	0	0	0	0	0	0
0,-1,-3,2,-2	0	0	0	0	0	0	0	0	0	0	0	0	1	0	0	0	0	0	0	0.5	0
0,-1,-3,-2,2	0	0	0	0	0	0	0	0	0	0	0	0	0	0.5	0	0	0	0	0	0	0
0,1,-3,-2,-26	0	0	0	0	0	0	0	0	0	0	0	0	0	0	0	0	0	0	0	0.5	0
0,1,-3,-2,-3	0	0	0	0	0	0	0	0	0	0	0	0	0	0	0	0	0	0	0	0.5	0
0,-1,3,-2,3	0	0	0	0	0	0	0	0	0	0.5	0	0	0	0	0	0	0	0	0	0	0
0,-1,3,-2,-3	0	0	0	0	0	1	1	0	0	0	0	0	0	0	0	0	0	0	0	0	0
0,-1,-3,2,3	0	0.2	0	0	0	0	0	0	0	0	0	0	0	0	0	1	0	0	0	0	0
0,-1,-3,-2,3	0	0	0	0	0.5	0	0	0	0	0	0	0	0	0	0	0	0	0	0	0	0
0,-1,-3,-2,-3	0	0	0	0	0	0	0	0	0	0	0	0	1	0.5	0	0	0	0	0	0	0
0,-1,3,-2,-4	0	0	0	0	0	0	0	0	0	0	1	0	0	1	0	0	0	0	0	0	0
0,-1,-3,-2,-4	0	0	0	0	0	0.166667	0.333333	0	0	0	0	0	0	0	0	0	0	0	0	0	0
0,1,3,2,5	0	0	0	0	0	0	0	0	0	0	0	0	0	0	0	0	0	0	0	0	1
0,1,3,-2,-5	0	0	0	0	0	0	0	0	0.4	0	0	0	0	0	0	0	0	0	0	0	0
0,1,-3,-2,5	0	0	0	0.333333	0	0	0	0	0	0	0	0	0	0	0	0	0	0	0	0	0
0,-1,3,2,5	0	0	0	0	0	0	0	0	0	0	0	0	0	0	0	0	0	0	0	0	1
0,-1,-3,-2,5	0	0	0	0	0	0	0.333333	0	0	0	0	0	0	0	0	0	0	0	0	0	0
0,-1,-3,-2,-5	0	0.5	0	0	0	0	0	0	0	0	0	0	0	0	0	0	0	0	0	0	0
0,1,-3,-2,6	0.5	0	0	0	0	0	0	0	0	0	0	0	0	0	0	0	0	0	0	0	0
0,-1,-3,-2,-6	1	0	0	0	0.5	0	0	0	0	0	0	0	0	0	0	0	0	0	0	0	0
0,1,3,-2,-7	0	0	0	0	0	0	0	0	0.2	0	0	0	0	0	0	0	0	0	0	0	0
0,-1,-3,-2,-7	0	0	0	0	0	0.166667	0	0	0	0	0	0	0	0	0	0	0	0	0	0	0
0,-1,-3,2,-8	0	0	0	0	0	0	0	0	0	0	0	0	0	0	0	0	0	0.5	0	0	0
0,1,3,-2,-9	0	0	0	0	0	0	0	0	0.2	0	0	0	0	0	0	0	0	0	0	0	0
0,-1,-3,-2,9	0	0.5	0	0	0	0.166667	0	0	0	0	0	0	0	0	0	0	0	0	0	0	0
0,-1,3,3,1	0	0	0	0	0	0	0	0	0	0	0	0	0	0	0	0	0	0	0	0	1
0,-1,3,3,-1	1	0	0	0	0	0	0	0	0	0	0	0	0	0	0	0	0	0	0	0	0
0,-1,-3,-3,1	1	0	0	0	0	0	0	0	0	0	0	0	0	0	0	0	0	0	0	0	0
0,-1,-3,-3,-1	0	1	0	0	0	0	0	0	0	0	0	0	0	0	0	0	0	0	0	0	0
0,1,3,-3,-2	0	0	0	1	0	0	0	0	0	0	0	0	0	0	0	0	0	0	0	0	0
0,-1,-3,-3,-2	0	0	1	0	0	0	0	0	0	0	0	0	0	0	0	0	0	0	0	0	0
0,1,3,3,-3	0	1	0	0	0	0	0	0	0	0	0	0	0	0	0	0	0	0	0	0	0
0,-1,-3,-3,-3	0	0	0	0	0	0	0	0	0	0	1	0	0	0	0	0	0	0	0	0	0
0,1,3,3,4	0	0	0	1	0	0	0	0	1	0	1	0	0	0	0	1	0	0	0	0	0
0,1,3,3,-4	0	0	0	0	0	0	0	0	0	0	0	0	0	0	0	0	0	0	0	1	0
0,-1,-3,3,4	0	0	0	0	0	1	0	0	0	0	0	0	0	0	0	0	0	0	0	0	0
0,-1,-3,3,-4	0	0	0	0	0	0	0	0	0	0	0	0	0	1	0	0	0	0	0	0	0
0,-1,-3,-3,-5	0	0	0	0	0	0	0	0	0	0	0	0	1	0	0	0	0	0	0	0	0
0,1,3,4,0	0	0	0	0.0909091	0	0.111111	0	0	0	0	0	0	0	0.5	0	0	0	0	0	0	0
0,-1,-3,-4,0	0	0	0	0	0	0	0	0	0	0	0.1	0	0	0	0	0	0	0	0	0	0
0,1,3,4,1	0.2	0.0526316	0	0.0909091	0	0	0	0	0	0	0	0	0	0	0	0	0	0	0	0	0
0,-1,-3,4,1	1	0	0	0	0	0	0	0	0	0	0	0	0	0	0	0	0	0	0	0	0
0,-1,-3,4,-1	0	0	0	0	0	0	0	0	0	1	0	0	0	0	0	0	0	0	0	0	0
0,-1,-3,-4,-1	0.230769	0.142857	0	0	0.333333	0.2	0.181818	0	0	0.25	0	0	0	0.25	0	0	0	0	0	0	0
0,1,3,4,10	0	0	0	0	0	0	0	0	0	0	0.25	0	0	0	0	0	0	0	0	0	0
0,1,3,4,12	0.05	0	0	0	0	0	0	0	0	0	0	0	0	0	0	0	0	0	0	0	0
0,1,3,4,2	0	0	0	0	0	0.111111	0	0	0	0	0	0	0	0	0	0	0	0	0	0	0
0,1,3,4,-2	0.05	0	0	0	0	0	0	0	0	0	0.25	0	0	0	0	0	0	0	0	0	0
0,-1,-3,4,2	0	0	0	0	0	0	0	0	0	0	1	0	0	0	0	0	0	0	0	0	0
0,-1,-3,-4,-2	0	0	1	0	0	0	0	0	0	0	0	0	0	0	0	0	0	0	0	0	0
0,1,3,4,3	0.05	0.0526316	0.2	0	0	0.444444	0.333333	0	0	0	0	0	0	0	0	0	0	0	0	0	0
0,-1,-3,4,3	0	0	0	0	0	0	0	0	0	0	0	0	0	0	0	0	1	0	0	0	0
0,-1,-3,-4,-3	0.153846	0	0	0.333333	0.333333	0	0.181818	0	0	0.25	0	0	0	0	0	0	0	0	0	0	0
0,1,3,4,4	0	0	0	0.181818	0	0	0	0	0	0	0	0	0	0	0	0	0	0	0	0	0
0,-1,-3,-4,-4	0	0.142857	0	0	0	0	0	0	0	0.25	0	0	0.4	0	0	0	0	0	0	0	0
0,1,3,4,5	0.2	0.157895	0	0.272727	0	0	0.166667	0	0	0	0.25	0	0	0.5	0	0	0	0	0	1	0
0,1,-3,-4,-5	0	0	0	0	0	1	0	0	0	0	0	0	0	0	0	0	0	0	0	0	0
0,-1,-3,-4,5	0	0	0	0.333333	0	0	0	0	0	0	0	0	0	0	0	0	0	0	0	0	0
0,-1,-3,-4,-5	0.153846	0.428571	0	0	0	0.2	0	0	0	0.25	0.3	0	0.2	0.25	0	0	0	0	0	0	0
0,1,3,4,6	0.45	0.631579	0.8	0.363636	1	0.333333	0.5	0	1	1	0.25	0	0	0	0	0	0	1	0	0	0
0,-1,-3,-4,6	0	0	0	0	0	0.3	0	0	0	0	0	0	0	0	0	0	0	0	0	0	0
0,-1,-3,-4,-6	0.307692	0.285714	0	0.333333	0.333333	0.1	0.272727	0	1	0	0.5	0	0.4	0.5	0	0	0	1	0	0	0
0,1,3,4,7	0	0.105263	0	0	0	0	0	0	0	0	0	0	0	0	0	0	0	0	0	0	0
0,-1,3,4,7	0	0	0	0	0	0	0	0	0	1	0	0	0	0	0	0	0	0	0	0	0
0,-1,-3,-4,-7	0	0	0	0	0	0.2	0.181818	0	0	0	0.1	0	0	0	0	0	0	0	0	0	0
0,-1,-3,-4,-8	0.0769231	0	0	0	0	0	0.0909091	0	0	0	0	0	0	0	0	0	0	0	0	0	0
0,-1,-3,4,9	0	0	1	0	0	0	0	0	0	0	0	0	0	0	0	0	0	0	0	0	0
0,-1,-3,-4,-9	0.0769231	0	0	0	0	0	0.0909091	0	0	0	0	0	0	0	0	0	0	0	0	0	0
0,1,3,5,0	0	0	0	0	0	0	0.142857	0	0	0	0	0	0	0	0	0	0	0	0	0	0
0,-1,-3,-5,0	0	0	0	0	0	0	0	0	0.142857	0	0	0	0.25	0	0	0.2	0	0	0	0.5	0
0,1,3,5,1	0	0	0	0	0	0	0	0	0	0	0	0	0	0	0	0	0	0	0	0.333333	0
0,1,3,5,-1	0	0	0	0	0	0	0	0	0	0	0	0	0	0.333333	0	0	0	0	0	0	0
0,-1,-3,-5,1	0	0	0	0	0	0	0	0	0.142857	0	0	0	0	0	0	0	0	0	0	0	0
0,-1,-3,-5,-1	0	0	0	0	0	0	0.285714	0	0	0	0	0	0	0	0	0	0	0	0	0	0
0,1,3,5,10	0	0	0.4	0	0	0	0.142857	0	0	0	0	0	0	0	0	0	0	0	0	0.166667	0
0,1,3,5,12	0	0	0	0	0	0	0	0	0.0588235	0	0	0	0	0	0	0	0	0	0	0	0
0,-1,-3,-5,18	0	0	0	0	0	0	0	0	0	0	0	0	0	0	0	0.2	0	0	0	0	0
0,-1,-3,-5,2	0	0	0	0	0	0	0	0	0.142857	0	0	0	0	0	0	0	0	0	0	0	0
0,-1,-3,-5,-2	0	0	0	0	0	0	0	0	0.142857	0	0	0	0	0	0	0	0	0	0	0	0
0,1,3,5,3	0	0.166667	0	0	0	0	0	0	0	0	0	0	0	0	0.5	0	1	0	0	0.166667	0
0,1,3,5,-3	0	0	0	0	0	0	0	0	0.0588235	0	0	0	0	0	0	0	0	0	0	0	0
0,1,-3,5,3	0	0	0	0	0	0	0	0	0	0	0	0	0	0	0	0	0	0	0	0	1
0,1,-3,-5,-3	0	0	0	0	0	0	0	0	0	0	0	0	0	0	1	0	0	0	0	0	0
0,-1,-3,5,3	0	0	0	0	0	1	0	0	0	0	0	0	0	0	0	0	0	0	0	0	0
0,-1,-3,-5,-3	0	0.142857	0	1	0.25	0	0.285714	0	0	0.166667	0	0	0	0	0	0	0	0	0	0	0
0,1,3,5,4	0.125	0	0	0	0	0	0	0	0	0.0909091	0	0	0	0	0	0	0	0	0	0	0
0,1,3,5,-4	0	0	0	0	0	0	0	0	0	0	0	0	0	0	0.5	0	0	0	0	0	0
0,-1,-3,-5,-4	0	0.142857	0	0	0	0	0	0	0	0.166667	0.5	0	0	0	0	0	0	0	0	0	0
0,1,3,5,5	0	0	0	0	0	0	0	0	0	0	0	0	0	0	0	0.5	0	0	0	0	1
0,-1,-3,-5,-5	0	0.142857	0	0	0	0	0	0	0	0	0	0	0	0	0	0	0	0	0	0	0
0,1,3,5,6	0.625	0.833333	0.2	0	0	0	0.428571	0	0.470588	0.545455	0.4	0	0.333333	0.333333	0	0	0	0	0	0	0
0,-1,-3,-5,6	0	0	0	0	0	0	0.142857	0	0	0	0	0	0	0	0	0	0	0	0	0	0
0,-1,-3,-5,-6	1	0.428571	1	0	0.5	0	0.285714	0	0.285714	0.666667	0.5	0	0.5	0	0	0.2	0	0	0	0.5	0
0,1,3,5,7	0.125	0	0.2	1	0	0	0	0	0.352941	0.272727	0.6	0	0	0.333333	0	0	0	0	0	0.333333	0
0,-1,-3,-5,7	0	0	0	0	0	0	0	0	0	0	0	0	0	0.5	0	0	0	0	0	0	0
0,-1,-3,-5,-7	0	0.142857	0	0	0	0	0	0	0.142857	0	0	0	0	0.5	0	0.4	0	0	0	0	0
0,1,3,5,8	0.125	0	0.2	0	0	1	0.285714	0	0.0588235	0	0	0	0.666667	0	0	0.5	0	0	0	0	0
0,-1,-3,-5,-8	0	0	0	0	0.25	0	0	0	0	0	0	0	0.25	0	0	0	0	0	0	0	1
0,1,3,5,-9	0	0	0	0	0	0	0	0	0	0.0909091	0	0	0	0	0	0	0	0	0	0	0
0,1,3,6,0	0	0	0	0	0	0	0	0	0	0	0	0	0	0	0	1	0	0	0	0	0
0,1,-3,-6,0	0	1	0	0	0	0	0	0	0	0	0	0	0.333333	0	0	0	0	0	0	0	0
0,-1,-3,-6,0	0	0	0	0	0	0	0.25	0	0	0	0	0	0	0	0	0	0	0	0	0	0
0,1,-3,-6,1	0	0	0	0	0	0	0	0	0	0	0	0	0	0	0	0	1	0	0	0	0
0,1,-3,-6,-1	0.5	0	0	0	0	0	0	0	0	0	0	0	0	0	0	0	0	0	0	0	0
0,-1,-3,-6,1	0	0.5	0	0	0	0	0	0	0	0	0	0	0	0	0	0	0	0	0	0	0
0,-1,-3,-6,-1	0	0	0	0	0	0	0	0.5	0	0	0	0	0	0	0	0	0	0	0	0.5	0
0,1,-3,-6,-10	0	0	0	0	1	0	0	0	0	0	0	0	0	0	0	0	0	0	0	0	0
0,-1,3,6,10	0	0	0	0.5	0	0	0	0	0	0	0	0	0	0	0	0	0	0	0	0	0
0,-1,-3,-6,-10	0	0.5	0	0	0	0	0.25	0	0	0	0	0	0	0	0	0	0	0	0	0	0
0,1,-3,-6,-11	0	0	0.5	0	0	0	0	0	0	0	0	0	0.666667	0	0	0	0	0	0	0	0
0,-1,-3,-6,-11	0.5	0	0	0	0	0	0	0	0	0	0	0	0	0	0	0	0	0	0	0	0
0,-1,-3,-6,-18	0	0	0	0	0	0	0	0.166667	0	0	0	0	0	0	0	0	0	0	0	0	0
0,-1,-3,6,2	0	0	0	0	0	0	0	0	0	0	0	0	0	0	0	0	0	0	0	0	1
0,-1,3,6,3	0	0	0	0	0	1	0	0	0	0	0	0	0	0	0	0	0	0	0	0	0
0,-1,-3,-6,-3	0	0	0	0	0	0	0.25	0	0	0	0	0.5	0	0	0	0	1	0	0	0	1
0,1,-3,-6,4	0	0	0	0	0	0.5	0	0	0	0	0	0	0	0	0	0	0	0	0	0	0
0,-1,-3,-6,-4	0.5	0	0	0	0	0	0	0	0	0	0	0	0	0	0	0	0	0	0	0	0
0,-1,3,6,5	0	0	0	0	0	0	0	0	1	0	0	0	0	0	0	0	0	0	0	0	0
0,-1,-3,-6,-5	0	0	0	0	0	1	0	0.166667	0	0	1	0	0	0	0	0	0	0	0	0.5	0
0,1,3,6,6	0	0	0	0	0	0	0	0	0	0	1	0	0	0	0	0	0	0	0	0	0
0,-1,-3,-6,6	0	0	0	0	0	0	0	0	0	0	0	0.5	0	0	0	0	0	0	0	0	0
0,-1,-3,-6,-6	0	0	0	0	0	0	0	0	0	0	0	0	0	0	0	1	0	0	0	0	0
0,1,3,6,7	0	0	0	0	0	0	0	0	0	0	0	0	0	1	0	0	0	0	0	0	0
0,-1,-3,-6,-7	0	0	0	0	0	0	0.25	0	0	0	0	0	0	0	0	0	0	0	0	0	0
0,1,-3,-6,-8	0	0	0.5	0	0	0.5	0	0	0	0	0	0	0	0	0	0	0	0	0	0	0
0,-1,3,6,8	0	0	0	0.5	0	0	0	0	0	0	0	0	0	0	0	0	0	0	0	0	0
0,-1,-3,-6,-8	0	0	0	0	0	0	0	0.166667	0	0	0	0	0	0	0	0	0	0	0	0	0
0,1,-3,-6,-9	0.5	0	0	0	0	0	0	0	0	0	0	0	0	1	1	0	0	0	0	0	0
0,1,-3,-7,0	0	0	0	1	0	0	0	0	0	0	0	0	0	0	0	0	0	0	0	0	0
0,-1,-3,-7,0	0	0	0	0	0	0	0	0	0	0	0	0	0	0.5	0	0	0	0	0	0	0
0,1,-3,-7,-11	0	0	0	0	0	0	0	0	0	0	0	0	1	0	0	0	0	0	0	0	0
0,-1,3,7,12	0	0	0	0	0	0	0	0	0	0	0	0	0	0	0	0	0	0	0	1	0
0,-1,-3,-7,2	0	0	0	0	0	0	0	0	0	0	0	0	0	0	0	0	0	0	0	0	1
0,-1,-3,7,4	0	0.5	0	0	0	0	0	0	0	0	0	0	0	0	0	0	0	0	0	0	0
0,-1,-3,7,5	0	0.5	0	0	0	0	0	0	0	0	0	0	0	0	0	0	0	0	0	0	0
0,-1,-3,7,6	0	0	0	0	0	1	0	0	0	0	0	0	0	0	0	0	0	0	0	0	0
0,-1,-3,-7,-8	0	0	1	0	0	0	0	0	0	0	1	0	0	0.5	0	0	0	0	0	1	0
0,-1,-3,-7,-9	0	0	0	0	0	0	1	0	0	0	0	0	0	0	0	0	0	0	0	0	0
0,1,-3,-8,1	0	0	0	0	0	0	0	0	0	0	0	0	0	0	0	0	0	0	0	0	1
0,-1,-3,-8,-1	1	0	0	0	0	0	0	0	0	0	0	0	0	0	0	0	0	0	0	0	0
0,-1,3,8,10	0	0	0	0	0	0	0	0	0	0	0	0	0	1	0	0	0	0	0	0	0
0,-1,-3,-8,-10	0	0	1	0	0	0	0	0	0	0	0	0	0	0	0	0	0	0	0	0	0
0,1,3,8,3	0	0	0	0	0	0	0	0	0	0	0	0	0	1	0	0	0	0	0	0	0
0,-1,-3,-8,-3	0	0	0	0	0	0	1	0	0	0	0	0	0	0	0	0	0	0	0	0	0
0,1,-3,-8,-4	0	0	0	0	0	1	0	0	0	0	0	0	0	0	0	0	0	0	0	0	0
0,-1,-3,-8,-6	0	0	0	0	0	0	0	0	0	0	1	0	0	0	0	0	0	0	0	0	0
0,1,3,-8,-9	1	0	0	0	0	0	0	0	0	0	0	0	0	0	0	0	0	0	0	0	0
0,-1,-3,8,9	0	0	0	0	1	0	0	0	0	0	0	0	0	1	0	0	0	0	0	0	0
0,1,-3,9,12	0	0	0	1	0	0	0	0	0	0	0	0	0	0	0	0	0	0	0	0	0
0,-1,-3,9,9	0	0	0	0	0	0	0	0	0	0	0	0	0	1	0	0	0	0	0	0	0
0,-1,-4,0,-1	0	0	0	0	0	0	0	0	0	0	0	0	0	1	0	0	0	0	0	0	0
0,1,4,0,3	0	0	0	0	0	0	0	0	0	1	0	0	0	0	0	0	0	0	0	0	0
0,1,4,1,1	0	0	0	0	0.5	0	0	0	0	0	0	0	0	0	0	0	0	0	0	0	0
0,1,4,1,-1	0.5	0	0	1	0	0	0	0	0	0	0	0	0	0	0	0	0	0	0	0	0
0,-1,4,1,-1	1	0	0	0	0	0	0	0	0	0	0	0	0	0	0	0	0	0	0	0	0
0,-1,-4,-1,1	0	0	0	0	0	0	0	0	0	0	0	0	1	0	0	0	0	0	0	0	0
0,1,4,1,2	0.5	1	0	0	0	1	1	0	0	0	0	0	0	0	0	0	0	0	0	0	0
0,1,-4,-1,-2	0	0	0	0	0	0.5	0	0	0	0	0	0	0	0	0	0	0	0	0	0	0
0,-1,-4,-1,2	0	0	0	0	0	0	0	0	0	0	0	0	0	0	0	0	0	0	0	1	0
0,-1,-4,-1,-2	0	0	0	0	0	0	0	0	0	0	1	0	0	0	0	0	0	0	0	0	0
0,1,4,1,-3	0	0	0	0	0.5	0	0	0	0	0	0	0	0	0	0	0	0	1	0	0	0
0,1,4,-1,-3	0	0	0	0	0	1	0	0	0	0	0	0	0	0	0	0	0	0	0	0	0
0,1,-4,-1,-3	0	0	0	0	0	0	0	0	0	0.5	0	0	0	0	0	0	0	0	0	0	0
0,-1,4,1,3	0	0	0	0	0	0	0	0	1	0	0	0	0	0	0	0	0	0	0	0	0
0,-1,4,1,-3	0	0	0	0	0	1	0	0	0	0	0	0	0	0	0	0	0	0	0	0	0
0,-1,-4,-1,3	0	0	0	0	0	1	0	0	0	0	0	0	0	0	0	0	0	0	1	0	0
0,1,-4,-1,4	0	0	0	0	0	0	0	0	0	0.5	0	0	0	0	0	0	0	0	0	0	0
0,1,-4,-1,-4	0	0	0	0	0	0.5	0	0	0	0	0	0	0	0	0	0	0	0	0	0	0
0,-1,4,-1,4	0	0	0	0	0	1	0	0	0	0	0	0	0	0	0	0	0	0	0	0	0
0,1,4,1,7	0	0	0	0	0	0	0	0	0	0	0	1	0	0	0	0	0	0	0	0	0
0,-1,-4,10,13	0	0	0	1	0	0	0	0	0	0	0	0	0	0	0	0	0	0	0	0	0
0,-1,-4,11,10	0	0	0	1	0	0	0	0	0	0	0	0	0	0	0	0	0	0	0	0	0
0,1,4,11,11	0	0	0	0	0	1	0	0	0	0	0	0	0	0	0	0	0	0	0	0	0
0,1,4,11,8	0	0	0	0	0	0	1	0	0	0	0	0	0	0	0	0	0	0	0	0	0
0,1,4,12,9	0	1	0	0	0	0	0	0	0	0	0	0	0	0	0	0	0	0	0	0	0
0,-1,4,2,0	0	0	0	0	0	0	0	0	1	0	1	0	0	0	0	0	0	0	0	0	0
0,1,4,2,1	0	1	0	0	0	0	0	0	0	0	0	0	0	0	0	0	0	0	0	0	0
0,1,-4,-2,-1	0	0	0	0	0	0	0	0	0	0	1	0	0	0	0	0	0	0	0	0	0
0,-1,-4,-2,1	0	0	0	0	0	0	1	0	0	0	0	0	0	0	0	0	0	0	0	0	0
0,-1,-4,-2,-1	0.5	0	0	0	0	0	0	0	0	0	0	0	0	0	0	0	0	0	0	0	0
0,1,4,2,2	0	0	0	0.5	0	0	0	0	0	0	0	0	0	0	0	0	0	0	0	0	0
0,1,4,2,-3	1	0	0	0	0	0	0.5	0	0	0	0	0	0	0	0	0	0	0	0	0	0
0,1,-4,-2,-3	0	0	0	0	0	0	0	0	0	0	0	0	0	0	0	0	0	0	0	1	0
0,-1,-4,-2,-3	0	0	0	0	0	0	0	0	0	0	0	0	0	1	0	0	0	0	0	0	0
0,1,4,2,4	0	0	0	0.5	0	0	0	0	0	0	0	0	0	0	0	0	0	0	0	0	0
0,1,4,2,-5	0	0	0	0	1	0	0	0	0	0	0	0	0	0	0	0	0	0	0	0	0
0,-1,-4,-2,-5	0	0	0	0	0	1	0	0	0	0	0	0	0	0	0	0	0	0	0	0	0
0,1,4,2,-6	0	0	0	0	0	0	0.5	0	0	0	0	0	0	0	0	0	0	0	0	0	0
0,-1,-4,-2,-6	0.5	0	0	0	0	0	0	0	0	0	0	0	0	0	0	0	0	0	0	0	0
0,-1,-4,-3,0	0	0	0	0	0	0	1	0	0	0	0	0	0	0	0	0	0	0	0	0	0
0,1,4,3,1	0	0	0	0	0	0.333333	0	0	0	0	0	0	0	0	0	0	0	0	0	0	0
0,-1,4,3,1	0	0	0	0	0	1	0	0	0	0	0	0	0	0	0	0	0	0	0	0	0
0,-1,-4,-3,-1	0.333333	1	0	0	0	0	0	0	0	0	0	0	0	0	0	0	0	0	0	0	0
0,-1,-4,-3,-11	0.333333	0	0	0	0	0	0	0	0	0	0	0	0	0	0	0	0	0	0	0	0
0,-1,-4,-3,-18	0	0	0	0	0	0	0	0	0	0	0	0	0	0	0	0	0	0	0	1	0
0,1,4,3,2	0	0	0	1	0	0.666667	0	0	0	0	0	0	0	0	0	0	0	0	0	0	0
0,-1,4,3,2	1	0	0	0	0	0	0	0	1	0	0	0	0	0	0	0	0	0	0	0	0
0,-1,-4,-3,-2	0	0	0	0	0	1	0	0	0	0	0	0	0	0	0	0	0	0	0	0	0
0,1,4,3,4	1	0	0	0	0	0	0	0	0	0	0	0	0	0	1	0	0	0	0	0	0
0,-1,-4,-3,-4	0.333333	0	0	0	0	0	0	0	0	0	0	0	0	0	0	0	0	0	0	0	0
0,-1,-4,-4,0	0	0	0	0	0	0	0	0	0	0	0	0	0	0	0	0	0	0	0	0	1
0,1,4,4,1	0	0	0	0	0	0	0	0	0	0	0.142857	0	0	0	1	0	0	0	0	0	0
0,1,4,4,-1	0	0	0	0	0	0	0	0	0	0	0.571429	0	0	0	0	0	0	0	0	0	0
0,-1,4,4,-1	1	0	0	0	0	0	0	0	0	0	0	0	0	0	0	0	0	0	0	0	0
0,-1,-4,4,-1	0	0	0	0	0	0	0	0	0	0	0	0	0	0.333333	0	0	0	0	0	0	0
0,-1,4,4,-10	0	0	0	0	0	0	0	0	0	0	0	0	0	0	0	1	0	0	0	0	0
0,-1,4,4,2	0	0	0	0	0	0	0	0	0	0	0	0	0	0	0	0	1	0	0	0	0
0,1,4,4,-3	0	0	0	0	0	0	0	0	0	0	0	0	0	0	0	0	0.5	0	0	0	0
0,-1,-4,4,3	0	0	0	0	0	0	0	0	0	0	0	0	0	0.333333	0	0	0	0	0	0	0
0,1,4,4,4	0	0	0	0	0	0	0	0	0	0	0.142857	0	0	0	0	0	0	0	0	0	0
0,-1,4,-4,4	0	0	0	0	0	0	0	0	0	0	0	0	0	0	0	0	0	0	0	0	1
0,-1,-4,4,-4	0	0	0	0	0	0	0	0	0	0	0	0	0	0.333333	0	0	0	0	0	0	0
0,1,4,4,5	0	0	0	0	0	0	0	0	0	0	0.142857	0	0	0	0	0	0	0	0	0	0
0,1,-4,-4,-6	0	0	0	1	0	0	0	0	0	0	0	0	0	0	0	0	0	0	0	0	0
0,1,4,4,7	0	0	0	0	0	0	0	0	0	0	0	0	0	0	0	0	0.5	0	0	0	0
0,-1,-4,-4,-7	0	0	0	0	0	0	0	0	0	0	0	0	0	1	0	0	0	0	0	0	0
0,-1,-4,-5,0	0	0	0	0	0	0.333333	0	0	0	0	0	0	0	0	0	0.333333	0	0	0	0	0
0,-1,-4,-5,-1	0	0	0	0	0	0	0	0	0	0	0	0	0	0.5	0	0	0	0	0	0	0
0,-1,-4,-5,2	0	0	0	0	0	0	0	0	0	0	0	0	0	0	0	0.333333	0	0	0	0	0
0,1,4,5,4	0	0	0	0	0	1	0	0	0	0	1	0	0	0	0	0	0	0	0	0	0
0,-1,-4,-5,-5	0	0	0	0	0	0	0	0	0	0	0	0	0	0	0	0.333333	0	0	0	0	0
0,-1,4,5,6	0	0	1	0	0	0	0	0	0	0	0	0	0	0	0	0	0	0	0	0	0
0,-1,-4,-5,-6	1	0	0	0	0	0	0.333333	0	0	0	0	0	1	0.5	0	0	0	0	0	0	0
0,1,4,5,7	0	1	0	0	0	0	0	0	0	0	0	0	0	0	0	0	0	0	0	0	0
0,-1,-4,-5,-7	0	0	0	0	1	0.666667	0.666667	0	0	0	1	0	0	0	0	0	0	0	0	0	0
0,-1,-4,-6,-1	0	0	0	0	0	0	0	0	0	0	0	0	0	0	0	0	1	0	0	0	0
0,1,4,6,4	0	0	0	0	0	0	0	0	0	0	0	0	0	1	0	0	0	0	0	0	0
0,1,4,6,6	0	0	0	0	0	0	0	0	0	0	0	0	0	0	0	0	0	0	0	1	0
0,1,4,6,7	0	0	0	0	0	0	0	0	0	0	0	0	0	0	0	0	0	0	1	0	0
0,-1,4,6,8	0	0	0	0	0	0	0	0	0	0	0	0	0	0	0	0	0	0	0	0	1
0,-1,-4,-6,-8	0	0	0	0	0	0	0	0	0	0	0	0	0	0	0	1	0	0	0	0	0
0,-1,-4,-7,-1	0	0	0	0	0	0	0	0	0	0	0	0	0	0	0	0	1	0	0	0	0
0,1,4,7,10	0	0.666667	0	0	1	0	0	0	0	0	0	0	0	1	0	0	0	0	0	0	0
0,1,-4,-7,-11	0	1	0	0	0	0	0	0	0	0	0	0	0	0	0	0	0	0	0	0	0
0,-1,4,7,11	0	1	0	0	0	1	0	0	0	0	0	0	0	0	0	0	0	0	0	0	0
0,1,4,7,12	0	0	0	0	0	0.25	1	0	0	0	0	0	1	0	0	0	0	0	0	0	0
0,1,4,7,4	0	0	0	0	0	0.25	0	0	0	0	1	0	0	0	0	1	0	0	0	0	0
0,1,-4,-7,-6	1	0	0	0	0	0	0	0	0	0	0	0	0	0	0	0	0	0	0	0	0
0,-1,-4,-7,-6	0	0	0	0	0	0	1	0	0	0	0	0	0	0	0	0	0	0	0	0	0
0,1,4,7,8	0	0.333333	0	0	0	0	0	0	0	0	0	0	0	0	0	0	0	0	0	0	0
0,1,4,7,9	0	0	0	0	0	0.5	0	0	0	0	0	0	0	0	0	0	1	0	0	0	0
0,-1,-4,-7,-9	0	0	0	0	0	0	0	0	1	0	0	0	0	0	0	0	0	0	0	0	0
0,-1,-4,-8,-1	0	0	0	0	0	0	0	0	0	0	0	0	0.5	0	0	0	0	0	0	0	0
0,-1,-4,-8,-10	0	0	0	0	0	0	0.2	0	0	0	0	0	0	0	0	0	0	0	0	1	0
0,1,4,8,11	0.5	0	1	0	0	0.666667	0	0	0	0	1	0	0	0	0	0	0	0	0	0	0
0,1,-4,-8,-11	0	1	0	0	0	0	0	0	0	0	0	0	0	0	0	0	0	0	0	0	0
0,-1,-4,-8,-11	0	0.666667	0	1	1	0.5	0.6	0	0	0	1	0	0	0	0	0	0	0	0	0	0
0,1,4,8,12	0	0	0	0	0	0	0.666667	0	0	0	0	0	1	0	0	0	0	0	0	0	0
0,-1,-4,-8,-12	1	0	0	0	0	0.5	0	0	0	0	0	0	0.5	0	0	0	0	0	0	0	0
0,1,4,8,13	0.5	0	0	0	0	0	0	0	0	0	0	0	0	0	0	0	0	0	0	0	0
0,1,4,8,4	0	0	0	1	0	0	0	0	0	0	0	0	0	0	0	0	0	0	0	0	0
0,1,4,8,5	0	0	0	0	0	0	0	0	0	0	0	0	0	0	0	0	1	0	0	0	0
0,1,4,8,6	0	0	0	0	0	0	0	0	0	0	0	0	0	0	0	0	0	0	1	0	0
0,-1,-4,-8,-6	0	0.333333	0	0	0	0	0	0	0	0	0	0	0	0	0	0	0	0	1	0	0
0,1,4,8,7	0	0	0	0	0	0.333333	0	0	0	1	0	0	0	0	0	0	0	0	0	0	0
0,1,4,8,9	0	0	0	0	0	0	0.333333	0	0	0	0	0	0	0	0	0	0	0	0	0	0
0,1,-4,-8,-9	0	0	0	0	0	0	1	0	0	0	0	0	0	0	0	0	0	0	0	0	0
0,-1,4,8,9	0	0	0	0	0	0	1	0	0	0	0	0	0	0	0	0	0	0	0	0	0
0,-1,-4,-8,-9	0	0	0	0	0	0	0.2	0	0	0	0	0	0	0	0	0	0	0	0	0	0
0,1,4,9,-1	1	0	0	0	0	0	0	0	0	0	0	0	0	0	0	0	0	0	0	0	0
0,1,4,9,11	0	0	0	0	0	0	0	0	1	0	0	0	0	0	0	0	0	0	0	0	0
0,1,-4,-9,-11	0	1	0	0	0	0	0	0	0	0	0	0	0	0	0	0	0	0	0	0	0
0,-1,4,9,2	0	0	0	0	0	0	0	0	0	0	0	0	0	0	0	0	0	0	1	0	0
0,1,4,9,7	0	0	0	0	1	0	0	0	0	0	0	0	0	0	0	0	0	0	0	0	0
0,1,5,0,1	1	0	0	0	0	0	0	0	0	0	0	0	0	0	0	0	0	0	0	0	0
0,-1,5,0,-1	1	0	0	0	0	0	0	0	0	0	0	0	0	0	0	0	0	0	0	0	0
0,-1,-5,0,-1	0	0	0	0	0	0	0	0	0	0	0	0	0.5	1	0	0	0	0	0	0	0
0,-1,-5,0,-5	0	0	0	0	0	0	0	0	0	0	0	0	0.5	0	0	0	0	0	0	0	0
0,-1,-5,-1,0	0	0	0	0	0	0	1	0	0	0	0	0	0	0	0	0	0	0	0	0	0
0,1,5,1,-1	0	0	0	0	0	0	0	0	1	0	0	0	0	0	0	0	0	0	0	0	0
0,1,5,1,2	0	0	0	0	0	1	0	0	0	0	0	0	0	0	0	0	0	0	0	0	0
0,1,-5,1,2	0	1	0	0	0	0	0	0	0	0	0	0	0	0	0	0	0	0	0	0	0
0,1,5,1,3	0	0	0	0	0	0	0	0	0	0	0	0	0	0.5	0	0	0	0	0	0	0
0,1,5,1,-3	0	0	0	0	0	0	0	0	0	0	0	0	0	0.5	0	0	0	0	0	0	0
0,-1,-5,-1,3	0	0	1	0	0	0	0	0	0	0	0	0	0	0	0	0	0	0	0	0	0
0,-1,-5,-1,-3	0	0	0	0	0	0	0	0	0	0	0	0	1	0	0	0	0	0	0	0	0
0,-1,-5,-1,4	0	0	0	0	0	0	0	0	0	0	0	0	0	0	0	0	0	0	1	0	0
0,-1,-5,-10,-13	0	0	0	0	0	0	0	0	0	0	0	0	0	0	0	0	0	0	1	0	0
0,-1,-5,-10,2	0	1	0	0	0	0	0	0	0	0	0	0	0	0	0	0	0	0	0	0	0
0,-1,-5,-10,-5	0	0	0	0	0	0	0	0	0	0	0	0	0	0	1	0	0	0	0	0	0
0,-1,-5,-10,-9	0	0	0	0	0	0	0	0	0	0	0	0	1	0	0	0	0	0	0	0	0
0,1,5,12,7	0	0	0	0	0	1	0	0	0	0	0	0	0	0	0	0	0	0	0	0	0
0,1,5,12,8	0	0	0	0	0	0	0	0	0	0	0	1	0	0	0	0	0	0	0	0	0
0,1,5,12,9	0	1	0	0	0	0	0	0	0	0	0	0	0	0	0	0	0	0	0	0	0
0,1,5,2,-3	0	0	0	0	0	0	1	0	0	0	0	0	0	0	0	0	0	0	0	0	0
0,-1,-5,2,3	0	0	0	0	0	0	0	0	0	0	0	0	1	0	0	0	0	0	0	0	0
0,-1,-5,-2,-3	0	0	0	0	1	0	0	0	0	0	0	0	0	0	0	0	0	0	0	0	0
0,-1,-5,-2,-5	0	1	0	0	0	0	0	0	0	0	0	0	0	0	0	0	0	0	0	0	0
0,-1,5,3,0	0	0	0	0	0	0	0	0	0	0	0	0	0	1	0	0	0	0	0	0	0
0,-1,-5,-3,0	0	0	0	0	0	0	0	0	1	0	0	0	0	0	0	0	0	0	0	0	0
0,-1,5,3,1	0	0	0	0	0	0	0	0	1	0	0	0	0	0	0	0	0	0	0	0	0
0,1,-5,-3,-2	0	0	0	0	0	0	0	0	0	0	0	0	0	1	0	0	0	0	0	0	0
0,-1,-5,-3,-5	1	0	0	0	0	0	0	0	0	0	0	1	0	0	0	0	0	0	0	1	1
0,-1,5,4,0	0	0	0	0	0	0	0	0	0	0	0	0	0	1	0	0	0	0	0	0	0
0,1,5,4,1	0	0	0	0	0	0	0	0	0	0	0	0	0	1	0	0	0	0	0	0	0
0,-1,-5,-4,-1	0	0	0	0	0	0	1	0	0	0	0	0	0	0	0	0	0	0	0	0	0
0,-1,5,4,3	0	0	0	0	0	1	0	0	0	0	0	0	0	0	0	0	1	0	0	0	0
0,1,5,4,5	1	0	0	0	0	0	0	0	0	0	0	0	0	0	0	0	0	0	0	0	0
0,-1,-5,-5,0	0	0	0	0	0	0	0	0	0	0	0	0	0	0	0	0	0	0	0	0	1
0,1,5,5,10	0	0	0	0	0	0	0	0	0	0	0	0	0	0	0	0.333333	0	0	0	0	0
0,1,-5,-5,-2	1	0	0	0	0	0	0	0	0	0	0	0	0	0	0	0	0	0	0	0	0
0,-1,5,5,2	1	0	0	0	0	0	0	0	0	0	0	0	0	0	0	0	0	0	0	0	0
0,1,5,5,3	0	0	0	0	0	0	0	0	0	0	0	0	0	0	0	0.666667	0	0	0	0	0
0,1,-5,-5,-5	0	0	0	0	0	0	0	0	0	0	1	0	0	0	0	0	0	0	0	0	0
0,-1,-5,-5,-7	0	0	0	0	0	0	0	0	1	0	0	0	0	0	0	0	0	0	0	0	0
0,-1,-5,-5,-9	0	0	0	0	0	0	0	0	0	0	0	0	0	1	0	0	0	0	0	0	0
0,-1,-5,-6,0	0	0	0	0	0	0	0	0	0	0	0	0	0	0.2	0	0	0	0	0	0	0
0,-1,-5,-6,-10	0	0	0	0	0	0	0	0	0	0	0	0	0	0.2	0	0	0	0	0	0	0
0,-1,5,6,3	0	0	0	0	0	0	0	0	1	0	0	0	0	0	0	0	0	0	0	0	0
0,-1,-5,-6,-3	0	0	0	0	0	0	0	0	0	0	0	0	0	0.2	1	0	0	0	0	0	0
0,-1,-5,-6,-5	0	0	1	0	0	0	0	0	0	0	0	0	0	0	0	0	0	0	0	0	0
0,-1,-5,-6,-7	0	0	0	0	0	0	0	0	0	0	0	0	0	0.4	0	0	0	0	0	0	0
0,1,5,6,8	0	0	1	0	0	0	0	0	0	0	0	0	0	0	0	0	0	0	0	0	0
0,-1,-5,-6,-8	0	0	0	0	0	0	0	0	0	1	0	0	0	0	0	0	0	0	0	0	0
0,-1,-5,-7,0	0	0	0	0	0	0	0	1	0	0	0	0	0	0	0	0	0	0	0	0	0
0,-1,5,7,1	0	0	0	0	0	0	1	0	0	0	0	0	0	0	0	0	0	0	0	0	0
0,-1,-5,-7,-2	0	0	0	0	0	0	0	0	0	0	0	0	0	0	0	0	0	0	1	0	0
0,-1,5,7,4	0	0	0	0	0	0	0	0	0	0	0	0	0	0	0	0	0	0	0	1	0
0,1,5,7,5	0	0	0	0	0	0	0	0	0	0	0	0	0	0	0	0.5	0	0	0	0	0
0,1,5,7,9	0	0	0	0	0	0	0	0	0	0	0	0	0	0	0	0.5	0	0	0	0	0
0,-1,-5,-8,-1	0	0	0	0	0	0	0	0	0	0	0	0	0.333333	0	0	0	0	0	0	0	0.5
0,1,5,8,10	0	0	0.166667	0	0	0	0	0	0	0	0	0	0	0	0	0	0	0	0	0	0
0,1,5,8,11	0.25	0.333333	0	0	0.166667	0	0.125	0	0	0	0	0	0	0	0	0	0	0	0	0	0
0,-1,-5,-8,-11	0	0	0	0	0	0	0	0	0	0	0	0	0	0	0	0	0	0	0	1	0
0,1,5,8,12	0.5	0.666667	0.833333	1	0.833333	1	0.375	0	1	0	0	0	1	0	0	0	0	0	0	0.5	0
0,-1,-5,-8,-12	0	0.75	0	0	1	0	0	0	0	0	0	0	0.666667	0	0	0	0	0	0	0	0
0,1,5,8,13	0	0	0	0	0	0	0.25	0	0	0	0	0	0	0	0	0	0	0	0	0	0
0,-1,-5,-8,-13	0	0	1	0	0	0	0	0	0	0	0	1	0	0	0	0	0	0.25	0	0	0
0,-1,-5,-8,-3	0	0.25	0	0	0	0	0	0	0	0	0	0	0	0	1	0	0	0.25	1	0	0.5
0,1,5,8,5	0.25	0	0	0	0	0	0	0	0	0	0	0	0	0	0	0	0	0	0	0	0
0,1,-5,-8,-5	0	0	0	0	0	0	0	0	0	0	1	0	0	0	0	0	0	0	0	0	0
0,1,5,8,7	0	0	0	0	0	0	0	0	0	0	0	0	0	0	0	0	0	0	0	0.5	0
0,-1,-5,-8,-8	0	0	0	0	0	0	0	0	0	0	0	0	0	0	0	0	0	0.5	0	0	0
0,1,5,8,9	0	0	0	0	0	0	0.25	0	0	0	0	0	0	0	0	0	0	0	0	0	0
0,-1,-5,-8,-9	0	0	0	0	0	0	0	0	0	0	0	0	0	1	0	0	0	0	0	0	0
0,-1,-5,-9,-10	0	1	0	0	0	0.5	0	0	0	0	0	0	0	0	0	0	0	0	0	0	0
0,1,5,9,12	1	0	0	0	0	0	1	0	0	0	0	0	1	0	0	0	0	0	0	0	0
0,-1,-5,-9,-13	0	0	0	0	0	0.5	1	0	0	0	0	0	0	0	0	0	0	0	0	0	0
0,-1,5,9,16	0	0	0	0	0	0	0	0	0	0	0	0	0	0	0	0	0	0	0	1	0
0,1,5,9,5	0	0	0	0	0	0.5	0	0	0	0	0	0	0	0	0	0	0	0	0	0	0
0,-1,-5,-9,-7	0	0	0	0	0	0	0	0	0	0	0	0	0	0	0	0	0	1	0	0	0
0,1,5,9,8	0	0	0	0	0	0.5	0	0	0	0	0	0	0	0	0	0	0	0	0	0	0
0,1,5,9,9	0	0	0	0	0	0	0	0	0	0	0	0	0	0	0	0	0	1	0	0	0
0,1,6,0,1	1	0	0	0	0	0	0	0	0	0	0	0	0	0	0	0	0	0	0	0	0
0,1,6,1,2	0	0	0	0	0	1	0	0	0	0	0	0	0	0	0	0	0	0	0	0	0
0,-1,-6,-1,-2	0	0	0	0	0	0	0	0	0.5	0	0	0	0	0	0	0	0	0	0	0	0
0,1,-6,-1,-3	0	0	0	0	0	0	0	0	0	0	0	0	0	0	0	0	0	0	0	1	0
0,1,6,-1,-5	0	1	0	0	0	0	0	0	0	0	0	0	0	0	0	0	0	0	0	0	0
0,-1,-6,-1,-6	0	0	0	0	0	0	0	0	0.5	0	0	0	0	0	0	0	0	0	0	0	0
0,-1,-6,-10,-11	0	1	0	0	0	1	0	0	0	0	0	0	0	0	0	0	0	0	0	0	0
0,1,6,11,13	0	0	0	0	0	0	0	0	0	0	0	0	0	1	0	0	0	0	0	0	0
0,-1,-6,-11,-18	0	0	0	0	0	0	0	0	1	0	0	0	0	0	0	0	0	0	0	0	0
0,-1,-6,-12,-13	0.666667	0	0	0	0	0	0	0	0	0	0	0	0	0	0	0	0	0	0	0	0
0,-1,-6,-12,-6	0.333333	0	0	0	0	0	0	0	0	0	0	0	0	0	0	0	0	0	0	0	0
0,1,6,-2,1	0	0	0	0	1	0	0	0	0	0	0	0	0	0	0	0	0	0	0	0	0
0,1,-6,-2,1	0	0	0	0	1	0	0	0	0	0	0	0	0	0	0	0	0	0	0	0	0
0,-1,6,3,4	1	0	0	0	0	0	0	0	0	0	0	0	0	0	0	0	0	0	0	0	0
0,-1,-6,-3,-5	1	0	0	0	0	0	0	0	0	0	1	0	0	0	0	0	0	0	0	0	0
0,1,6,3,6	0	0	0	0	0	0	0	0	0	0	0	0	0	0	0	0	1	0	0	0	0
0,1,6,4,0	0	0	0	1	0	0	0	0	0	0	0	0	0	0	0	0	0	0	0	0	0
0,1,-6,-4,-1	1	0	0	0	0	0	0	0	0	0	0	0	0	0	0	0	0	0	0	0	0
0,1,6,4,2	0	1	0	0	0	0	0	0	0	0	0	0	0	0	0	0	0	0	0	0	0
0,1,-6,-4,-3	0	0	0	0	0	0	0	0	0	0	0	0	0	1	0	0	0	0	0	0	0
0,-1,-6,-4,6	0	0	0	0	0	0	1	0	0	0	0	0	0	0	0	0	0	0	0	0	0
0,1,-6,-5,1	0	0	0	0	0	0	0	0	0	0	0	0	0	1	0	0	0	0	0	0	0
0,-1,-6,-5,-1	0	0	0	0	0	1	0	0	0	0	0	0	0	0	0	0	0	0	0	0	0
0,1,6,5,4	0	0	0	1	0	0	0	0	0	0	0	0	0	0	0	0	0	0	0	0	0
0,-1,6,5,4	0	0	0	0	0	0	0	0	1	0	0	0	0	0	0	0	0	0	0	0	0
0,-1,-6,-5,-5	0	0	0	0	0	0	0	0	0	0	0	0	0	1	0	0	0	0	0	0	0
0,1,6,5,6	0	0	0	0	0	0	0	0	1	0	0	0	0	0	0	0	0	0	0	0	0
0,1,-6,-5,-6	0	1	0	0	0	0	0	0	0	0	0	0	0	0	0	0	0	0	0	0	0
0,-1,-6,-5,-6	0	1	0	0	0	0	0	0	0	0	0	0	0	0	0	0	0	0	0	0	0
0,-1,-6,-6,-12	0	0	0	0	0	0	0	0	0	0	0	0	0	1	0	0	0	0	0	0	0
0,-1,6,6,3	0	0	0	0	0	0	0	0	0	0	0	0	0	0	0	0	1	0	0	0	0
0,1,-6,-6,-6	0	0	0	0	0	0	0	0	1	0	0	0	0	0	0	0	0	0	0	0	0
0,-1,6,6,9	0	0	0	0	0	0	0	0	0	0	0	0	0	0	0	1	0	0	0	0	0
0,1,6,-7,-2	0	0	0	0	0	0	0	0	0	0	0	0	0	0	0	0	0	0	0	1	0
0,1,6,7,6	0	0	0	0	0	0	0	0	0	0	0	0	0	0.5	0	0	0	0	0	0	0
0,1,-6,-7,-6	0	1	0	0	0	0	0	0	0	0	0	0	0	0	0	0	0	0	0	0	0
0,-1,-6,-7,-6	0	0	0	0	0	0	0	0	0	0	0	0	0	0.666667	0	0	0	0	0	0	0
0,1,6,7,7	0	0	0	0	0	0	0	0	0	0	0	0	0	0.5	0	0	0	0	0	0	0
0,-1,-6,-7,-8	0	0	0	0	0	0	0	0	0	0	0	0	0	0.333333	0	0	0	0	0	0	0
0,-1,-6,-8,-1	0	1	0	0	0	0	0	0	0	0	0	0	0	0	0	0	0	0	0	0	0
0,1,6,8,10	0	0	0	0	0	0	0	0	0	0	0	0	0	0	0	0	1	0	0	0	0
0,-1,6,8,10	0	0	0	0	0	0	0	0	0	0	0	0	0	0	0	1	0	0	0	0	0
0,-1,-6,-8,-10	0	0	0	0	0	0	1	0	0	0	0	0	0	0	0	0	0	0	0	0	0
0,-1,-6,-8,6	0	0	0	0	1	0	0	0	0	0	0	0	0	0	0	0	0	0	0	0	0
0,-1,-6,-8,-7	0	0	0	0	0	0	0	0	0	0	0	0	0	0	1	0	0	0	0	0	0
0,1,6,8,9	0	0	0	0	0	0	1	0	0	0	0	0	0	0	0	0	0	0	0	0	0
0,1,6,9,4	0	0	0	0	0	1	0	0	0	0	0	0	0	0	0	0	0	0	0	0	0
0,1,6,9,9	0	0	0	0	1	0	0	0	0	0	0	0	0	0	0	0	0	0	0	0	0
0,-1,6,9,9	0	0	0	0	0	0	0	0	0	0	0	0	0	0	0	0	1	0	0	0	0
0,1,7,0,7	0	0	0	0	0	0	0	0	0	0	0	0	0	0	0	0	1	0	0	0	0
0,-1,7,-1,3	1	0	0	0	0	0	0	0	0	0	0	0	0	0	0	0	0	0	0	0	0
0,-1,7,10,10	0	0	0	0	0	0	0	0	0	0	1	0	0	0	0	0	0	0	0	0	0
0,1,7,10,12	0	0	0	0	0	0	0	0	0	0	0	0	0	0	0	0	0	0	0	1	0
0,-1,7,10,8	0	0	0	1	0	0	0	0	0	0	0	0	0	0	0	0	0	0	0	0	0
0,1,7,12,11	1	0	0	0	0	0	0	0	0	0	0	0	0	0	0	0	0	0	0	0	0
0,-1,-7,-2,-4	0	0	0	0	0	0	0	0	0	0	0	0	0	0	0	0	0	0	1	0	0
0,1,-7,-3,0	1	0	0	0	1	0	0	0	0	0	0	0	0	0	0	0	0	0	0	0	0
0,-1,7,3,0	1	0	0	0	0	0	0	0	0	0	0	0	0	0	0	0	0	0	0	0	0
0,-1,7,3,-1	0	0	0	0	0	0	0	0	0	0	0	0	0	1	0	0	0	0	0	0	0
0,1,-7,-4,0	0	0	0	0	0	1	0	0	0	1	0	0	0	0	0	0	0	0	0	0	0
0,1,-7,-4,-3	0	0	0	0	1	0	0	0	0	0	0	0	0	0	0	0	0	0	0	0	0
0,1,-7,-5,-3	0	0	0	0	0	0	0	0	1	0	0	0	0	0	0	0	0	0	0	0	0
0,1,-7,-5,-4	0	0	0	0	0	0	0	0	0	0	0	0	0	1	0	0	0	0	0	0	0
0,1,7,6,4	0	0	0	0	0	0	0	0	0	0	1	0	0	0	0	0	0	0	0	0	0
0,-1,7,6,5	0	0	0	0	0	0	1	0	0	0	0	0	0	0	0	0	0	0	0	0	0
0,1,-7,-7,-23	0	0	0	0	0	0	0	0	1	0	0	0	0	0	0	0	0	0	0	0	0
0,-1,7,7,4	0	0	0	1	0	0	0	0	0	0	0	0	0	0	0	0	0	0	0	0	0
0,1,7,7,7	0	0	0	0	0	0	0	1	0	0	0	0	0	0	0	0	0	0	0	0	0
0,1,7,8,1	0	0	0	0	0	0	0	0	0	0	0	0	0	0.333333	0	0	0	0	0	0	0
0,-1,7,8,12	1	0	0	0	0	0	0	0	0	0	0	0	0	0	0	0	0	0	0	0	0
0,-1,7,8,5	0	0	0	0	0	0	1	0	0	0	0	0	0	0	0	0	0	0	0	0	0
0,1,7,8,7	0	0	0	0	0	0	0	0	0	0	0	0	0	0.666667	0	0	0	0	0	0	0
0,-1,-7,-8,-7	0	0	0	0	0	0	0	0	0	0	0	0	0	1	0	0	0	0	0	0	0
0,1,7,9,12	0	0	0	0	0	0	0	0	0	0	0	0	0	1	0	0	0	0	0	0	0
0,1,-7,-9,-7	0	0	1	0	0	0	0	0	0	0	0	0	0	0	0	0	0	0	0	0	0
0,1,8,0,1	1	0	0	0	0	0	0	0	0	0	0	0	0	0	0	0	0	0	0	0	0
0,-1,-8,-1,2	0	0	0	0	0	0	0	0	0	0	0	0	0	1	0	0	0	0	0	0	0
0,-1,-8,-1,-3	0	0	0	0	0	0	0	0	0	0	0	0	0	0	0	0	0	0	0	1	0
0,1,8,1,6	0	0	0	0	0	1	0	0	0	0	0	0	0	0	0	0	0	0	0	0	0
0,-1,8,10,7	0	0	0	0	0	0	0	0	0	0	0	0	0	0	0	0	1	0	0	0	0
0,1,8,12,15	1	0	0	0	0	0	0	0	0	0	0	0	0	0	0	0	0	0	0	0	0
0,-1,-8,-13,-8	0	0	0	0	0	0	0	0	1	0	0	0	0	0	0	0	0	0	0	0	0
0,-1,-8,-14,-6	0	0	0	0	0	0	0	0	0	0	0	0	0	0	0	0	0	0	0	1	0
0,1,-8,-3,-8	0	0	0	1	0	0	0	0	0	0	0	0	0	0	0	0	0	0	0	0	0
0,1,8,4,0	0	0	0	1	0	0	0	0	0	0	0	0	0	0	0	0	0	0	0	0	0
0,-1,8,4,-1	0	0	0	0	0	0	0	0	0	0	0	0	0	1	0	0	0	0	0	0	0
0,1,-8,-4,-3	0	0	0	0	0	1	0	0	0	0	0	0	0	0	0	0	0	0	0	0	0
0,-1,8,4,9	0	0	0	0	0	0	0	0	0	0	0	0	1	0	0	0	0	0	0	0	0
0,-1,8,5,1	0	0	0	0	0	0	0	0	0	0	0	0	0	0	0	0	0	0	0	1	0
0,1,-8,-5,-4	0	0	0	1	0	0	0	0	0	0	0	0	0	0	0	0	0	0	0	0	0
0,1,8,6,1	0	0	0	0	0	0	0	0	0	0	0	0	1	0	0	0	0	0	0	0	0
0,-1,-8,-6,2	0	1	0	0	0	0	0	0	0	0	0	0	0	0	0	0	0	0	0	0	0
0,1,8,8,11	0	0	0	0	0	0	0	0	0	0	0	0	0	0	0	1	0	0	0	0	0
0,1,8,9,10	0	0	0	0	0	0	1	0	0	0	0	0	0	0	0	0	0	0	0	0	0
0,1,8,9,11	0	0	1	0	0	0	0	0	0	0	0	0	0	0	0	0	0	0	0	0	0
0,-1,8,9,7	0	0	0	1	0	0	0	0	0	0	0	0	0	0	0	0	0	0	0	0	0
0,1,9,0,1	1	0	0	0	0	0	0	0	0	0	0	0	0	0	0	0	0	0	0	0	0
0,1,9,1,4	0	0	0	0	0	0	0	0	0	0	1	0	0	0	0	0	0	0	0	0	0
0,-1,9,-1,7	0	0	0	0	0	1	0	0	0	0	0	0	0	0	0	0	0	0	0	0	0
0,-1,-9,-11,-13	0	1	0	0	0	0	0	0	0	0	0	0	0	0	0	0	0	0	0	0	0
0,-1,-9,-2,-3	0	0	0	0	0	0	1	0	0	0	0	0	0	0	0	0	0	0	0	0	0
0,1,9,4,1	0	0	0	0	0	0	0	0	0	0	0	0	0	1	0	0	0	0	0	0	0
0,1,9,4,7	0	0	0	0	1	0	0	0	0	0	0	0	0	0	0	0	0	0	0	0	0
0,-1,9,5,1	0	0	0	0	0	1	0	0	0	0	0	0	0	0	0	0	0	0	0	0	0
0,-1,-9,-5,-1	0	0	0	0	0	0	0	0	0	0	0	1	0	0	0	0	0	0	0	0	0
0,-1,-9,-6,-2	0	0	0	0	0	1	0	0	0	0	0	0	0	0	0	0	0	0	0	0	0
0,-1,-9,-6,-3	0	0	0	1	0	0	0	0	0	0	0	0	0	0	0	0	0	0	0	0	0
0,1,9,6,7	1	0	0	0	0	0	0	0	0	0	0	0	0	0	0	0	0	0	0	0	0
0,-1,9,6,7	0	0	0	0	0	1	0	0	0	0	0	0	0	0	0.5	0	0	0	0	0	0
0,-1,9,6,9	0	0	0	0	0	0	0	0	0	0	0	0	0	0	0.5	0	0	0	0	0	0
0,-1,9,8,3	0	0	0	0	0	1	0	0	0	0	0	0	0	0	0	0	0	0	0	0	0
0,-1,-9,-8,6	0	0	1	0	0	0	0	0	0	0	0	0	0	0	0	0	0	0	0	0	0
0,-10,0,0,-3	0	0	0	0	0	0	0	0	0	0	0	0	0	0	0	1	0	0	0	0	0
0,-10,0,0,5	0	0	0	0	0	0	0	0	0	0	0	0	0	0	0	0	0	0	0	0	1
0,-10,0,-1,-3	0	0	0	1	0	0	0	0	0	0	0	0	0	0	0	0	0	0	0	0	0
0,-10,0,-10,0	0	0	0	0	0	0	0	0	0	0	0	0	0	0	0	0	0	0	0	0	1
0,10,0,10,10	0	0	0	0	0	0	0	0	0	0	0	0	0	0	0	0	0	0	0	0	1
0,10,0,12,0	0	0	0	0	0	0	0	0	0	0	0	0	0	1	0	0	0	0	0	0	0
0,10,0,3,10	0	0	0	0	0	0	0	0	0	0	0	0	0	0	0	0	0	0	1	0	0
0,10,0,8,10	0	0	0	0	0	1	0	0	0	0	0	0	0	0	0	0	0	0	0	0	0
0,10,1,10,2	0	0	0	0	1	0	0	0	0	0	0	0	0	0	0	0	0	0	0	0	0
0,10,10,10,10	0	0	0	0	0	0	0	0	0	0	0	0	0	0	0	0	1	0	0	0	0
0,10,10,15,17	0	0	0	0	0	0	0	0	0	0	0	0	0	0	0	0	0	0	0	0	1
0,10,10,3,-21	0	0	0	0	0	0	0	0	0	0	0	0	0	0	0	0	0	0	0	0	1
0,10,10,4,1	0	0	0	0	1	0	0	0	0	0	0	0	0	0	0	0	0	0	0	0	0
0,10,10,7,10	0	0	0	0	0	0	0	0	0	0	0	0	0	0	0	1	0	0	0	1	0
0,10,10,7,4	0	0	0	0	0	0	0	0	0	0	0	0	0	1	0	0	0	0	0	0	0
0,10,10,8,8	0	0	0	0	0	0	0	0	0	0	1	0	0	0	0	0	0	0	0	0	0
0,10,10,8,9	0	0	0	0	0	0	0	1	0	0	0	0	0	0	0	0	0	0	0	0	0
0,10,11,13,10	0	0	1	0	0	0	0	0	0	0	0	0	0	0	0	0	0	0	0	0	0
0,10,12,10,1	0	0	0	0	0	0	0	0	0	0	0	0	0	0	0	1	0	0	0	0	0
0,10,12,10,7	0	0	0	0	0	0	0	1	0	0	0	0	0	0	0	0	0	0	0	0	0
0,10,12,-12,-12	0	0	0	0	0	0	0	0	0	0	0	0	0	0	0	0	0	1	0	0	0
0,10,12,15,15	0	0	0	0	0	0	0	0	0	0	0	0	0	0	0	0	0	0	0	1	0
0,10,12,17,14	0	0	0	0	0	0	0	0	0	0	0	0	0	0	1	0	0	0	0	0	0
0,-10,-12,-22,-17	0	0	0	0	0	0	0	0	0	0	0	0	0	1	0	0	0	0	0	0	0
0,10,12,8,5	0	0	0	0	1	0	0	0	0	0	0	0	0	0	0	0	0	0	0	0	0
0,10,13,-3,6	0	0	0	0	0	1	0	0	0	0	0	0	0	0	0	0	0	0	0	0	0
0,10,15,17,19	0	0	0	0	0	0	0	0	0	0	0	0	0	0	0	1	0	0	0	0	0
0,10,19,17,15	0	0	0	0	0	0	0	0	1	0	0	0	0	0	0	0	0	0	0	0	0
0,-10,-2,0,-2	0	0	0	0	0	1	0	0	0	0	0	0	0	0	0	0	0	0	0	0	0
0,-10,2,-10,-19	0	0	0	0	0	0	0	0	0	0	0	0	0	1	0	0	0	0	0	0	0
0,10,2,5,10	0	0	0	0	0	0	0	0	0	0	0	0	0	0	0	0	0	0	1	0	0
0,-10,-2,-8,0	0	0	0	0	0	0	0	0	1	0	0	0	0	0	0	0	0	0	0	0	0
0,10,-3,7,5	0	0	0	0	0	1	0	0	0	0	0	0	0	0	0	0	0	0	0	0	0
0,-10,-4,-1,-3	0	0	0	0	0	0	0	0	0	1	0	0	0	0	0	0	0	0	0	0	0
0,10,4,22,16	0	0	0	0	0	0	0	0	0	1	0	0	0	0	0	0	0	0	0	0	0
0,-10,4,9,9	0	0	0	0	0	0	0	0	1	0	0	0	0	0	0	0	0	0	0	0	0
0,-10,-5,0,-1	0	1	0	0	0	0	0	0	0	0	1	0	0	0	0	0	0	0	0	0	0
0,-10,-5,0,14	0	0	0	0	0	0	0	0	0	0	0	0	0	1	0	0	0	0	0	0	0
0,-10,-5,2,0	0	0	0	0	0	0	0	0	0	0	0	0	0	0	0	0	0	0	1	0	0
0,10,5,3,-1	0	0	0	0	0	1	0	0	0	0	0	0	0	0	0	0	0	0	0	0	0
0,10,5,3,-2	0	0	0	0	0	0	0	0	0	0	0	0	0	1	0	0	0	0	0	0	0
0,10,5,8,10	0	0	0	0	0	0	0	0	0	0	0	0	0	0	0	0	0	0	1	0	0
0,10,6,10,1	0	0	0	0	0	0	0	0	0	0	0	0	1	0	0	0	0	0	0	0	0
0,10,6,2,-2	0	0	0	0	0	0	0	0	0	1	0	0	0	0	0	0	0	0	0	0	0
0,10,6,2,9	0	0	0	0	0	1	0	0	0	0	0	0	0	0	0	0	0	0	0	0	0
0,10,6,3,1	0	0	0	0	0	0	0	0	0	0	0	0	0	0	0	0	0	0	0	0	1
0,-10,-7,0,-1	0.5	0	0	0	0	0	0	0	0	0	0	0	0	0	0	0	0	0	0	0	0
0,-10,-7,0,-10	0.5	0	0	0	0	0	0	0	0	0	0	0	0	0	0	0	0	0	0	0	0
0,-10,-7,0,-2	0	0	0	0	0	0	0	0	0	0	0	0	0	0	0	0	0	0	1	0	0
0,10,7,10,10	0	0	0	0	0	0	0	0	0	0	0	0	0	0	0	0	0	0	0	0	1
0,-10,-7,-10,-14	0	0	0	0	0	0	0	0	0	0	0	0	0	0	0	0	0	1	0	0	0
0,10,7,10,8	0	0	0	0	0	0	0	0	0	0	0	0	0	0	1	0	0	0	0	0	0
0,-10,-7,-10,-9	0	0	1	0	0	0	0	0	0	0	0	0	0	0	0	0	0	0	0	0	0
0,10,7,2,-2	0	0	0	0	0	0	0	0	0	0	1	0	0	0	0	0	0	0	0	0	0
0,10,7,3,0	0	0	0	0	0	0	0	0	0	0	0	0	1	0	0	0	0	0	0	0	0
0,10,7,3,12	0	0	0	0	1	0	0	0	0	0	0	0	0	0	0	0	0	0	0	0	0
0,10,7,3,14	0	0	0	0	0	1	0	0	0	0	0	0	0	0	0	0	0	0	0	0	0
0,10,7,4,0	0	0	0	0	0	0	0	0	0	0	0	0	0	0	0	0	0	0	0	1	0
0,10,7,5,2	0	0	0	0	0	0	0	0	0	0	1	0	0	0	0	0	0	0	0	0	1
0,-10,-7,-5,-2	0	0	0	0	0	0	0	0	0	0	0	1	0	0	0	0	0	0	0	1	0
0,10,7,5,3	0	1	0	0	0	0	0	0	0	0	0	0	0	0	0	0	0	0	0	0	0
0,-10,-7,-5,-7	0	0	0	0	0	1	0	0	0	0	0	0	0	0	0	0	0	0	0	0	0
0,-10,-7,-7,-3	0	0	0	0	0	0	0	0	0	0	0	0	0	0	0	0	0	1	0	0	0
0,10,7,8,10	0	0	0	0	0	1	0	0	0	0	0	0	0	0	0	0	0	0	0	0	0
0,10,7,8,5	0.5	0	0	0	0	0	0	0	0	0	0	0	0	0	1	0	0	0	0	0	0
0,10,7,8,7	0.5	0	0	0	0	0	0	0	0	0	0	0	0	0	0	0	0	0	0	0	1
0,10,8,0,-2	0	0	0	0	0	0	0	0	0	0	0	0	0	0	1	0	0	0	0	0	0
0,10,8,4,5	0	0	0	0	0	1	0	0	0	0	0	0	0	0	0	0	0	0	0	0	0
0,10,8,5,1	0	0	0	0	0	1	0	0	0	0	0	0	0	0	0	0	0	0	0	0	0
0,10,8,7,5	0	0.5	0	0	0	0	0	0	0	0	0	0	0	0	0	0	0	0	0	0	0
0,10,8,7,6	0	0.5	0	0	0	0	0	0	0	0	0	0	0	0	0	0	0	0	0	0	0
0,10,8,7,8	0	0	0	0	0	0	1	0	0	0	0	0	0	0	0	0	0	0	0	0	0
0,10,9,4,0	0	0	0	0	0	1	0	0	0	0	0	0	0	0	0	0	0	0	0	0	0
0,-10,-9,-6,-3	0	0	0	0	0	0	0	0	0	0	0	0	0	1	0	0	0	0	0	0	0
0,10,9,7,6	0	0	0	1	0	0	0	0	0	0	0	0	0	0	0	0	0	0	0	0	0
0,10,9,8,7	0	0	0	0	0	1	0	0	0	0	0	0	0	0	0	0	0	0	0	0	0
0,-10,-9,-8,-7	0	0	0	0	1	0	0	0	0	0	0	0	0	0	0	0	0	0	0	0	0
0,-11,0,0,0	0	0	0	0	0	0	0	0	0	0	0	0	0	0.5	0	0	0	0	0	0	0
0,-11,0,0,-11	0	0	0	0	0	0	0	0	0	0	0	0	0	0.5	0	0	0	0	0	0	0
0,-11,0,1,1	0	0	0	0	0	0	0	0	0	0	0	0	0	1	0	0	0	0	0	0	0
0,11,0,11,0	0	0	0	0	0	0	0	0	0	0	0	0	0	0.5	0	0	0	0	0	0	0
0,-11,0,-11,0	0	0	0	0	0	0	0	0	0	0	0	0	0	1	0	0	0	0	0	0	0
0,11,0,11,11	0	0	0	0	0	0	0	0	0	0	0	0	0	0.5	0	0	0	0	0	0	0
0,-11,-1,-10,-1	0	0	0	0	1	0	0	0	0	0	0	0	0	0	0	0	0	0	0	0	0
0,11,10,11,11	0	0	0	0	0	0	0	0	0	0	0	0	0	0	0	0	0	0	0	0	1
0,-11,-10,-9,-8	0	0	0	0	1	0	0	0	0	0	0	0	0	0	0	0	0	0	0	0	0
0,11,11,0,11	0	0	0	0	0	0	0	0	0	0	0	0	0	1	0	0	0	0	0	0	0
0,11,11,11,0	0	0	0	0	0	0	0	0	0	0	0	0	0	1	0	0	0	0	0	0	0
0,11,12,10,7	0	0	0	0	1	0	0	0	0	0	0	0	0	0	0	0	0	0	0	0	0
0,11,12,12,3	0	0	0	0	0	0	0	0	0	0	0	0	0	1	0	0	0	0	0	0	0
0,11,12,13,14	1	0	0	0	0	0	0	0	0	0	0	0	0	0	0	0	0	0	0	0	0
0,11,12,14,12	0	0	0	0	0	0	0	0	0	0	0	0	0	1	0	0	0	0	0	0	0
0,-11,-12,-15,-14	1	0	0	0	0	0	0	0	0	0	0	0	0	0	0	0	0	0	0	0	0
0,-11,-12,-3,-6	0	0	0	0	0	0	0	0	0	0	0	0	0	0	0	0	0	0	0	1	0
0,11,12,9,8	0	0	0	0	0	0	1	0	0	0	0	0	0	0	0	0	0	0	0	0	0
0,11,13,11,8	0	0	0	0	0	0	0	0	0	0	0	0	0	0	0	0	1	0	0	0	0
0,-11,-13,-15,-17	0	0	0	0	0	0	0	0	0	0	0	0	0	0	0	0	1	0	0	0	0
0,11,14,12,10	0	0	0	0	0	0	0	0	0	0	0	0	1	0	0	0	0	0	0	0	0
0,-11,-14,-9,-6	0	0	0	0	0	0	0	0	0	0	0	0	0	1	0	0	0	0	0	0	0
0,11,15,19,23	0	0	0	0	0	0	0	0	0	0	0	0	0	1	0	0	0	0	0	0	0
0,-11,-2,-11,-4	0	0	0	0	0	0	0	0	1	0	0	0	0	0	0	0	0	0	0	0	0
0,-11,-2,-13,-4	0	0	0	0	0	0	0	0	1	0	0	0	0	0	0	0	0	0	0	0	0
0,-11,-2,-4,5	0	0	0	0	0	0	0	0	1	0	0	0	0	0	0	0	0	0	0	0	0
0,-11,-2,-6,3	0	0	0	0	0	0	0	0	1	0	0	0	0	0	0	0	0	0	0	0	0
0,-11,-2,-7,2	0	0	0	0	0	0	0	0	1	0	0	0	0	0	0	0	0	0	0	0	0
0,-11,-2,-8,1	0	0	0	0	0	0	0	0	1	0	0	0	0	0	0	0	0	0	0	0	0
0,-11,-2,-9,0	0	0	0	0	0	0	0	0	1	0	0	0	0	0	0	0	0	0	0	0	0
0,11,5,2,14	0	0	0	0	0	0	0	0	0	0	0	0	0	0	0	1	0	0	0	0	0
0,-11,5,7,12	0	0	0	0	0	0	0	0	0	0	0	0	0	0	0	1	0	0	0	0	0
0,-11,-7,-3,0	0	0	0	0	0	0	0	0	0	0	0	0	1	0	0	0	0	0	0	0	0
0,11,7,4,1	0	1	0	0	0	0	0	0	0	0	0	0	0	0	0	0	0	0	0	0	0
0,11,7,4,3	0	0	0	0	0	1	0	0	0	0	0	0	0	0	0	0	0	0	0	0	0
0,-11,-7,-5,-2	0	0	0	0	0	0	0	0	0	0	0	0	0	0	0	1	0	0	0	0	0
0,11,8,7,2	0	0	0	0	0	0	0	0	0	0	0	0	0	1	0	0	0	0	0	0	0
0,11,8,7,8	0	0	0	0	0	0	0	0	0	0	0	0	0	0	1	0	0	0	0	0	0
0,11,8,8,23	0	0	0	0	0	0	0	0	1	0	0	0	0	0	0	0	0	0	0	0	0
0,11,8,9,11	0	1	0	0	0	0	0	0	0	0	0	0	0	0	0	0	0	0	0	0	0
0,11,8,9,13	1	0	0	0	0	0	0	0	0	0	0	0	0	0	0	0	0	0	0	0	0
0,11,9,4,0	0	1	0	0	0	0	0	0	0	0	0	0	0	0	0	0	0	0	0	0	0
0,11,9,6,3	0	0	0	0	0	1	0	0	0	0	0	0	0	0	0	0	0	0	0	0	0
0,11,9,7,2	0	0	0	0	0	0	0	0	1	0	0	0	0	0	0	0	0	0	0	0	0
0,11,9,7,-23	0	0	0	0	0	0	0	0	0	1	0	0	0	0	0	0	0	0	0	0	0
0,11,9,7,4	0	1	0	0	0	0	0	0	0	0	0	0	0	0	0	0	0	0	0	0	0
0,11,9,8,7	0	0	0	0	0	1	0	0	0	0	0	0	0	0	0	0	0	0	0	0	0
0,-12,0,0,0	0	0	0	0	0	0	0	0	0	0	0	0	0	0	0	0	0	0	0	1	0
0,12,0,12,0	0	0	0	0	0	0	0	0	0	0	0	0	0	0	0	0	0	0	0	0.5	0
0,-12,0,-12,0	0	0	0	0	0	0	0	0	0	0	0	0	0	0	0	0	0	0	0	1	1
0,12,0,12,12	0	0	0	0	0	0	0	0	0	0	0	0	0	0	0	0	0	0	0	0.5	0
0,12,0,12,9	0	0	0	0	0	0	0	0	0	0	0	0	0	0	0	0	0	0	0	0	1
0,-12,0,2,3	0	0	0	0	0	0	0	0	0	0	0	0	0	0	0	0	0	0	0	0	1
0,-12,0,-3,0	0	0	0	0	0	0	0	0	0	0	0	0	0	0	0	0	0	0	0	0	1
0,-12,0,-9,0	0	0	0	0	0	0	0	0	0	0	0	0	0	0	0	0	0	0	0	1	0
0,12,0,-9,-4	0	0	0	0	0	0	0	0	0	0	0	0	0	1	0	0	0	0	0	0	0
0,-12,1,0,-2	1	0	0	0	0	0	0	0	0	0	0	0	0	0	0	0	0	0	0	0	0
0,12,1,11,2	0	0	0	0	1	0	0	0	0	0	0	0	0	0	0	0	0	0	0	0	0
0,12,1,12,1	0	0	0	0	0	0	0	0	0	0	0	0	0	1	0	0	0	0	0	0	0
0,-12,-1,-3,-5	0	0	0	0	0	0	0	0	0	1	0	0	0	0	0	0	0	0	0	0	0
0,12,10,12,10	0	0	0	0	0	0	0	0	0	0	0	0	0	0	0	1	0	0	0	0	0
0,12,10,7,5	0	0	0	0	1	0	0	0	0	0	0	0	0	0	0	0	0	0	0	0	0
0,12,10,7,8	0	0	0	0	0	0	1	0	0	0	0	0	0	0	0	0	0	0	0	0	0
0,12,11,10,9	0	0	0	0	0	1	0	0	0	0	0	0	0	0	0	0	0	0	0	0	0
0,-12,-11,-10,-9	0	0	0	0	1	0	0	0	0	0	0	0	0	0	0	0	0	0	0	0	0
0,12,11,11,7	0	0	0	0	0	0	0	0	0	0	0	0	0	0	0	0	0	1	0	0	0
0,12,11,-14,-12	0	0	0	0	0	0	0	0	0	0	0	0	0	0	0	0	0	0	1	0	0
0,12,11,7,9	0	0	0	0	0	0	0	0	0	0	0	0	0	0	0	0	0	0	0	1	0
0,12,12,10,12	0	0	0	0	0	0	0	0	0	0	1	0	0	0	0	0	0	0	0	1	0
0,-12,-12,-10,-14	0	0	0	0	0	0	0	0	0	0	0	0	0	0	0	0	1	0	0	0	0
0,12,12,11,2	0	0	0	0	0	0	0	0	0	0	0	0	0	0	0	0	0	0	0	0	1
0,12,12,11,5	0	0	0	0	0	0	0	0	0	0	0	0	0	0	0	0	0	0	1	0	0
0,12,12,12,11	0	0	0	0	0	0	0	0	0	0	0	0	0	0	0	0	0	0	0	1	0
0,12,12,12,12	0	0	0	0	0	0	0	0	0	0	0	0	0	0	0	0	0	0	1	0	0
0,12,12,12,9	0	0	0	0	0	0	0	0	0	0	0	0	0	1	0	0	0	0	0	0	0
0,12,12,13,16	0	0	0	0	0	0	0	0	0	0	1	0	0	0	0	0	0	0	0	0	0
0,12,12,15,12	0	0	0	0	0	0	0	0	0	0	0	0	0	0	0	1	0	0	0	0	0
0,-12,-12,-15,-12	0	0	0	0	0	0	0	1	0	0	0	0	0	0	0	0	0	0	0	0	0
0,-12,-12,-9,-12	0	0	0	0	0	0	0	0	1	0	0	0	0	0	0	0	0	0	0	0	0
0,12,14,10,5	0	0	0	0	0	0	0	0	0	0	0	0	0	0	0	0	0	0	0	1	0
0,12,14,15,17	0	0	0	0	0	0	0	0	0	0	0	0	0	0	0	0	0	0	0	0	1
0,-12,-14,-16,-20	0	0	0	0	0	0	0	0	0	1	0	0	0	0	0	0	0	0	0	0	0
0,-12,-14,-19,1	0	0	0	0	0	0	0	0	0	0	0	0	0	1	0	0	0	0	0	0	0
0,12,14,2,12	0	0	0	0	0	0	0	0	0	0	0	0	0	0	0	0	0	0	0	1	0
0,12,14,3,19	0	0	0	0	0	0	0	0	0	0	0	0	0	0	0	1	0	0	0	0	0
0,-12,-15,-10,-15	0	0	0	0	0	0	0	0	0	0	0	0	0	0	0	1	0	0	0	0	0
0,12,15,13,8	0	0	0	1	0	0	0	0	0	0	0	0	0	0	0	0	0	0	0	0	0
0,12,15,14,17	0	0	0	0	0	0	0	0	0	0	0	0	0	0	0	0	0	0	0	0	1
0,-12,-16,-21,-9	0	0	0	0	0	0	0	0	0	0	1	0	0	0	0	0	0	0	0	0	0
0,12,17,16,17	1	0	0	0	0	0	0	0	0	0	0	0	0	0	0	0	0	0	0	0	0
0,-12,-17,-22,-11	0	0	0	0	0	0	0	0	0	0	0	0	0	1	0	0	0	0	0	0	0
0,12,19,12,21	0	0	0	0	0	0	0	1	0	0	0	0	0	0	0	0	0	0	0	0	0
0,-12,-2,-5,-8	0	0	0	0	0	0	0	0	0	0	0	0	0	0	0	0	0	0	0	1	0
0,-12,2,-8,-10	0	0	0	0	0	0	0	0	0	0	0	0	0	1	0	0	0	0	0	0	0
0,-12,2,-8,-3	0	0	0	0	0	0	0	0	0	0	0	0	0	0	0	0	0	0	1	0	0
0,-12,-21,-16,1	0	0	0	0	0	0	0	0	0	0	0	0	0	1	0	0	0	0	0	0	0
0,12,3,12,0	0	0	0	0	0	0	0	0	0	0	0	0	0	0	0	0	0	0	0	0.666667	0
0,12,3,12,3	0	0	0	0	0	0	0	0	0	0	0	0	0	0	0	0	0	0	0	0.333333	0
0,-12,-3,-15,3	0	0	0	0	0	0	0	0	0	0	0	0	0	0	0	0	0	0	0	1	0
0,12,-4,-3,0	0	0	0	0	0	0	0	0	0	0	0	1	0	0	0	0	0	0	0	0	0
0,12,4,9,12	0	1	0	0	0	0	0	0	0	0	0	0	0	0	0	0	0	0	0	0	0
0,-12,-5,-5,-6	0	0	0	0	0	0	0	0	0	0	0	0	0	0	0	0	0	0	1	0	0
0,12,6,13,6	0	0	0	0	0	0	0	0	0	0	1	0	0	0	0	0	0	0	0	0	0
0,-12,6,5,1	0	0	0	0	0	0	0	0	0	0	0	0	0	0	0	0	0	0	0	1	0
0,-12,-7,-2,0	0	0	0	0	0	0	0	0	1	0	0	0	0	0	0	0	0	0	0	0	0
0,12,7,4,8	0	0	0	0	0	0	0	0	0	0	0	0	0	1	0	0	0	0	0	0	0
0,-12,-7,-5,-4	0	0	0	0	0	0	0	0	1	0	0	0	0	0	0	0	0	0	0	0	0
0,-12,-7,-6,0	0	0	0	0	0	0	0	1	0	0	0	0	0	0	0	0	0	0	0	0	0
0,-12,-7,-7,-8	0	0	0	0	0	0	0	0	0	0	0	0	0	0	0	1	0	0	0	0	0
0,-12,8,11,16	0	0	0	0	0	0	0	0	0	1	0	0	0	0	0	0	0	0	0	0	0
0,12,8,4,0	0	0	0	0	0	0	0	0	0	0	1	0	0	0	0	0	0	0	0	0	0
0,12,8,5,0	0	0	0	0	0	0	0	0	0	0	1	0	0	0	0	0	0	0	0	0	0
0,12,8,5,1	0	0	0	0	1	0	0	0	0	0	0	0	0	0	0	0	0	0	0	0	0
0,12,8,5,15	0	0	0	0	0	1	0	0	0	0	0	0	0	0	0	0	0	0	0	0	0
0,-12,-8,-5,-2	0	0	0	0	0	0	1	0	0	0	0	0	0	0	0	0	0	0	0	0	0
0,-12,-8,-5,-8	0	0	1	0	0	0	0	0	0	0	0	0	0	0	0	0	0	0	0	0	0
0,-12,-8,-7,-1	0	0	0	0	0	0	0	0	0	0	0	0	0	0	0	0	0	0	0	1	0
0,-12,-8,-8,-10	0	0	0	0	0	0	0	0	0	0	0	0	0	0	0	0	1	0	0	0	0
0,12,9,10,12	0	0	0	0	0	0	0	0	1	0	0	0	0	0	0	0	0	0	0	0	0
0,12,9,12,14	0	0	0	0	0	0	0	0	0	0	1	0	0	0	0	0	0	0	0	0	0
0,12,9,12,9	0	0	0	0	0	0	0	0	0	0	0	0	0	0	0	0	0	0	0	0	1
0,12,9,4,0	0	0	0	0	0	0	0	0	0	0	1	0	0	0	0	0	0	0	0	0	0
0,12,9,5,0	0	0	0	0	0	0	0	0	0	0	1	0	0	0	0	0	1	0	0	0	0
0,12,9,7,5	0	0	0	0	0	0	0	0	0	0	1	0	0	0	0	0	0	0	0	0	0
0,-13,0,-6,0	0	0	0	0	0	0	0	0	0	0	0	0	0	0	0	0	0	0	0	1	0
0,13,10,6,3	0	0	0	0	1	0	0	0	0	0	0	0	0	0	0	0	0	0	0	0	0
0,13,11,10,8	0	1	0	0	0	0	0	0	0	0	0	0	0	0	0	0	0	0	0	0	0
0,13,11,8,4	0	0	0	0	0	1	0	0	0	0	0	0	0	0	0	0	0	0	0	0	0
0,13,12,10,9	1	0	0	0	0	0	0	0	0	0	0	0	0	0	0	0	0	0	0	0	0
0,-13,-13,-1,-1	0	0	0	0	0	0	0	0	0	0	0	0	0	0	0	0	0	0	0	0	1
0,13,13,13,13	0	0	0	0	0	0	0	0	0	0	0	0	0	0	1	0	0	0	0	0	0
0,13,14,12,7	0	1	0	0	0	0	0	0	0	0	0	0	0	0	0	0	0	0	0	0	0
0,13,17,19,20	0	0	0	0	0	0	0	0	0	0	0	0	0	0	1	0	0	0	0	0	0
0,-13,-20,-18,-13	0	0	0	0	0	0	0	0	0	0	0	0	0	0	0	1	0	0	0	0	0
0,-13,-3,-5,-8	0	0	0	0	0	1	0	0	0	0	0	0	0	0	0	0	0	0	0	0	0
0,13,3,8,13	0	1	0	0	0	0	0	0	0	0	0	0	0	0	0	0	0	0	0	0	0
0,-13,-4,-11,-2	0	0	0	0	0	0	0	0	1	0	0	0	0	0	0	0	0	0	0	0	0
0,13,7,13,18	0	0	0	0	0	0	0	0	0	0	0	0	0	0	0	0	0	0	0	1	0
0,13,8,1,8	0	0	0	0	0	0	0	0	0	0	0	0	0	1	0	0	0	0	0	0	0
0,-13,-8,-5,-4	0	0	0	0	0	0	0	0	0	0	0	0	0	0	0	0	0	0	0	1	0
0,-13,-9,-6,-2	0	0	0	1	0	0	0	0	0	0	0	0	0	0	0	0	0	0	0	0	0
0,-14,0,0,0	0	0	0	0	0	0	0	0	0	1	0	0	0	0	0	0	0	0	0	0	0
0,-14,-10,-12,-10	0	0	0	0	0	0	0	0	0	0	0	0	0	0	0	1	0	0	0	0	0
0,14,10,6,15	0	0	0	0	0.5	0	0	0	0	0	0	0	0	0	0	0	0	0	0	0	0
0,14,10,6,7	0	0	0	0	0.5	0	0	0	0	0	0	0	0	0	0	0	0	0	0	0	0
0,14,10,7,17	0	0	0	0	0	1	0	0	0	0	0	0	0	0	0	0	0	0	0	0	0
0,14,10,8,5	0	0	0	0	0	0	0	0	0	1	0	0	0	0	0	0	0	0	0	0	0
0,14,12,10,14	0	0	0	0	0	0	0	0	0	0	0	0	0	0	0	0	1	0	0	0	0
0,-14,-12,-7,-8	0	0	0	0	0	0	0	0	0	0	0	0	0	0	0	0	0	1	0	0	0
0,14,12,7,9	0	0	0	0	0	0	0	0	0	0	0	0	0	0	0	0	0	1	0	0	0
0,-14,-13,6,3	1	0	0	0	0	0	0	0	0	0	0	0	0	0	0	0	0	0	0	0	0
0,14,14,14,14	0	0	0	0	0	0	0	0	0	1	0	0	0	0	0	0	0	0	0	0	0
0,14,14,15,12	0	0	1	0	0	0	0	0	0	0	0	0	0	0	0	0	0	0	0	0	0
0,14,14,2,0	0	0	0	0	0	0	0	0	0	0	0	0	0	1	0	0	0	0	0	0	0
0,-14,-17,-12,0	0	0	0	0	0	0	0	0	0	0	0	0	0	0	0	1	0	0	0	0	0
0,14,17,15,12	0	0	0	1	0	0	0	0	0	0	0	0	0	0	0	0	0	0	0	0	0
0,-14,-17,-17,-10	0	0	0	0	0	0	0	0	0	0	0	0	0	0	0	0	0	1	0	0	0
0,14,19,19,14	0	0	0	0	0	0	0	0	1	0	0	0	0	0	0	0	0	0	0	0	0
0,14,26,26,24	0	0	0	0	0	0	0	0	0	0	0	0	0	0	0	0	0	0	0	1	0
0,14,4,2,-8	0	0	0	0	0	0	0	0	0	0	0	0	0	1	0	0	0	0	0	0	0
0,14,4,9,16	0	0	0	0	0	0	0	0	0	0	0	0	0	0	0	0	0	0	1	0	0
0,-14,-5,-14,-5	0	0	0	0	0	0	0	0	1	0	0	0	0	0	0	0	0	0	0	0	0
0,-14,-9,-4,-9	0	0	0	0	0	0	0	0	0	1	0	0	0	0	0	0	0	0	0	0	0
0,-15,-10,-5,-3	0	1	0	0	0	0	0	0	0	0	0	0	0	0	0	0	0	0	0	0	0
0,15,12,19,17	0	0	0	0	0	0	0	0	0	0	0	1	0	0	0	0	0	0	0	0	0
0,-15,-12,-24,-12	0	0	0	0	0	0	0	0	0	0	0	0	0	0	0	0	0	0	0	0	1
0,15,13,14,10	1	0	0	0	0	0	0	0	0	0	0	0	0	0	0	0	0	0	0	0	0
0,15,14,14,15	0	0	0	1	0	0	0	0	0	0	0	0	0	0	0	0	0	0	0	0	0
0,15,14,7,2	0	0	0	0	0	0	0	0	1	0	0	0	0	0	0	0	0	0	0	0	0
0,-15,-17,0,-12	0	0	0	0	0	0	0	0	0	0	0	0	0	0	0	0	0	0	0	1	0
0,15,20,21,20	0	0	0	0	0	0	0	0	0	0	1	0	0	0	0	0	0	0	0	0	0
0,-15,-8,-10,-12	0	1	0	0	0	0	0	0	0	0	0	0	0	0	0	0	0	0	0	0	0
0,-15,-9,-9,-11	0	0	0	0	0	0	0	0	0	0	0	0	0	1	0	0	0	0	0	0	0
0,16,11,14,18	0	0	0	0	0	0	0	0	0	0	0	0	1	0	0	0	0	0	0	0	0
0,-16,-11,-15,-12	0	0	0	0	0	0	0	0	0	1	0	0	0	0	0	0	0	0	0	0	0
0,-16,-11,-8,-9	0	0	0	0	0	0	0	0	1	0	0	0	0	0	0	0	0	0	0	0	0
0,-16,-14,-12,-12	0	0	0	0	0	0	0	0	1	0	0	0	0	0	0	0	0	0	0	0	0
0,16,15,10,5	0	0	0	0	0	0	0	0	1	0	0	0	0	0	0	0	0	0	0	0	0
0,-16,-15,-12,-15	0	0	0	0	0	0	0	0	0	0	0	1	0	0	0	0	0	0	0	0	0
0,-16,-15,-12,-9	0	0	0	0	0	0	0	0	0	0	0	0	0	1	0	0	0	0	0	0	0
0,16,18,23,23	0	0	0	0	0	0	0	0	0	0	0	0	0	0	0	1	0	0	0	0	0
0,16,26,26,26	0	0	0	0	0	0	0	0	0	0	0	0	0	0	0	0	1	0	0	0	0
0,-16,-7,-11,-12	0	0	0	0	0	1	0	0	0	0	0	0	0	0	0	0	0	0	0	0	0
0,-16,-8,-15,-14	0	0	0	1	0	0	0	0	0	0	0	0	0	0	0	0	0	0	0	0	0
0,-17,-12,-10,-8	0	0	0	0	0	0	0	0	1	0	0	0	0	0	0	0	0	0	0	0	0
0,-17,-12,-8,-12	0	0	0	0	0	0	0	0	0	0	1	0	0	0	0	0	0	0	0	0	0
0,17,13,10,6	0	0	0	0	1	0	0	0	0	0	0	0	0	0	0	0	0	0	0	0	0
0,17,14,10,7	0	0	0	0	0	0	0	0	0	0	0	0	1	0	0	0	0	0	0	0	0
0,-17,-15,-10,-12	0	0	0	0	0	0	0	0	0	0	0	0	0	0	0	0	0	1	0	0	0
0,-17,-15,-12,-10	0	0	0	0	0	0	0	0	0	0	0	0	0	0	0	0	0	0	0	1	0
0,-17,-15,-13,-15	0	0	0	0	0	0	0	0	0	0	0	0	0	0	0	0	0	0	0	0	1
0,17,16,17,17	0	0	0	0	0	0	0	0	0	0	0	0	0	0	0	0	0	0	0	0	1
0,17,17,15,0	0	0	0	0	0	0	0	0	0	0	0	0	0	0	0	0	0	0	0	0	1
0,17,17,17,17	0	0	0	0	0	0	0	0	0	0	0	0	0	0	1	0	0	0	0	0	0
0,-17,-2,-4,-3	1	0	0	0	0	0	0	0	0	0	0	0	0	0	0	0	0	0	0	0	0
0,17,5,17,8	0	0	0	0	0	0	0	0	0	0	0	0	0	0	0	0	0	0	0	1	0
0,17,5,19,9	0	0	0	0	0	0	0	0	0	0	0	0	0	1	0	0	0	0	0	0	0
0,18,12,16,9	0	0	0	0	0	0	0	0	0	1	0	0	0	0	0	0	0	0	0	0	0
0,18,17,13,10	0	0	0	0	0	0	0	0	0	0	0	0	0	0	0	0	0	0	0	1	0
0,-18,-17,-16,-12	0	0	0	0	0	0	0	0	0	0	0	0	0	0	0	0	0	0	0	1	0
0,18,19,20,21	0	0	0	0	0	0	0	0	0	0	1	0	0	0	0	0	0	0	0	0	0
0,18,22,18,15	0	0	0	0	0	0	0	0	0	0	0	0	0	0	0	0	0	1	0	0	0
0,-19,-15,-12,-13	0	0	0	0	0	0	0	0	0	0	0	0	0	0	0	1	0	0	0	0	0
0,19,16,13,12	1	0	0	0	0	0	0	0	0	0	0	0	0	0	0	0	0	0	0	0	0
0,19,17,14,15	0	0	0	0	1	0	0	0	0	0	0	0	0	0	0	0	0	0	0	0	0
0,-19,-17,-15,-13	0	0	0	0	0	0	0	0	0	0	0	0	0	0	0	1	0	0	0	0	0
0,19,17,22,20	0	0	0	0	0	0	0	0	0	0	0	0	0	0	0	0	0	0	0	1	0
0,19,17,9,7	0	0	0	0	0	0	0	0	0	0	0	0	0	0	0	0	0	1	0	0	0
0,2,0,0,0	0	0	0	0	0	0	0	0	0	0	0	0	0	0	0	0	0	0	0	0	1
0,-2,0,0,0	0	0	0	0	0	0	0	0.333333	0	0	0	0	0	0	0	0.5	0	0	0	0	0
0,2,0,0,-1	0	0	0	0	0	0	0	0	0.428571	0	0	0	0	0	0	0	0	0	0	0	0
0,-2,0,0,1	0	0	0	0	0	0	0	0	0	0	1	0	0	0	0	0	0	0	0	0	0
0,2,0,0,10	0	0	0	0	0	0	0	1	0	0	0	0	0	0	0	0	0	0	0	0	0
0,-2,0,0,-12	0	0	0	0	0	0	0	0.333333	0	0	0	0	0	0	0	0	0	0	0	0	0
0,2,0,0,2	0	0	0	0	0	0	0	0	0	0	0	0	0	0	0	1	0	0	0	0	0
0,2,0,0,-2	0	0	0	0	0	0	0	0	0.571429	0	0	1	0	0	0	0	1	1	0	0	0
0,-2,0,0,2	0	0	0	0	0	0	0	0	0	0	0	0	0	0	0	0.5	0	0	0	0	0
0,-2,0,0,3	0	0	0	0	0	0	0	0	1	0	0	0	0	0	0	0	0	0	0	0	0
0,-2,0,0,-3	0	0	0	0	0	0	0	0.333333	0	0	0	0	0	0	0	0	1	0	0	0	0
0,-2,0,0,-4	0	0	0	1	0	0	0	0	0	0	0	0	0	0	0	0	0	0	0	0	0
0,2,0,1,0	0	0	0	0	0	0	0	0	1	0	0	0	0	1	0	0	0	0	0	0	0
0,2,0,-1,0	0.5	0.6	0	0	0	0	0	0	0	0	0	0	0	0	0	0	0	0	0	0.666667	0.5
0,-2,0,1,0	0	0	0	0.5	0	0	0	0	0	0	1	0	0	0	0	0.333333	0	0	0	0.25	1
0,2,0,1,-1	0	0	0	0	0	0	0	0	0	0	1	0	0	0	0	0	1	0	0	0	0
0,2,0,-1,1	0	0	0	0	0	0	0	0	0.5	0	1	0	0	0	0	0	0	0	0	0	0
0,2,0,-1,-1	0	0	0	0	0.333333	0	0	0	0	0	0	0	0	0	0	0	0	0	0	0	0
0,-2,0,1,1	0	0	0	0	0	0	0	0	0	0	0	0	0	0	0	0.333333	0	0	0	0	0
0,-2,0,1,-1	0	0	0	0	0	0	0	0	0	0	0	0	0	0	0	0.166667	0	0	0	0	0
0,-2,0,1,-11	0	0	0	0	0	0	0	0	0	0	0	0	0	0	0	0	0	0	0	0.25	0
0,2,0,-1,2	0	0	0	0	0	0	0	0	0	0	0	0.5	0	0	0	0	0	0	0	0	0
0,2,0,-1,-2	0	0	0	0.333333	0	0.5	0	0	0	0	0	0	0	0	0	0	0	0	0	0	0
0,-2,0,1,2	0	0	0	0	1	0	0	0	0	0	0	0	0	0	0	0	0	0	0	0	0
0,2,0,-1,-3	0.5	0.2	0	0.666667	0.666667	0	1	0	0.5	0	0	0	0	0.5	0	0	0	0	0	0.333333	0.5
0,-2,0,1,3	0	1	0	0.5	0	0	0	0	0	1	0	0	0	0	0	0	0	0	1	0.5	0
0,-2,0,1,-3	0	0	0	0	0	0	1	0	0	0	0	0	0	0	0	0	0	0	0	0	0
0,2,0,-1,4	0	0	0	0	0	0.5	0	0	0	0	0	0	0	0	0	0	0	0	0	0	0
0,2,0,-1,-5	0	0	0	0	0	0	0	0	0	0	0	0.5	0	0.5	0	0	0	0	0	0	0
0,-2,0,1,5	0	0	0	0	0	0	0	0	1	0	0	0	0	0	0	0.166667	0	0	0	0	0
0,-2,0,-1,-5	0	0	0	0	0	0	0	0	0	0	0	0	0	0	0	0	0	0	1	0	0
0,2,0,-1,-6	0	0.2	0	0	0	0	0	0	0	0	0	0	0	0	0	0	0	0	0	0	0
0,-2,0,10,5	0	0	0	0	0	0	0	0	0	0	0	0	0	0	0	0	0	0	1	0	0
0,2,0,-10,-7	0	0	0	0	0	0	0	0	0	0	0	0	0	0	0	0	0	0	0	1	0
0,-2,0,-10,-7	0	0	0	0	0	0	0	0	0	0	0	1	0	0	0	0	0	0	0	0	0
0,2,0,12,12	0	0	0	0	0	0	0	0	0	0	0	0	0	0	0	0	0	0	1	0	0
0,-2,0,12,15	0	0	0	0	0	0	0	0	0	0	0	0	0	0	0	0	0	0	0	0	1
0,2,0,-12,-8	0	0	0	0	0	0	1	0	0	0	0	0	0	0	0	0	0	0	0	0	0
0,-2,0,12,9	0	0	0	0	0	0	0	0	0	0	1	0	0	0	0	0	0	0	0	0	0
0,-2,0,-14,-17	0	0	0	0	0	0	0	0	0	0	0	0	0	0	0	0	0	1	0	0	0
0,-2,0,15,12	0	0	0	0	0	0	0	0	0	0	0	1	0	0	0	0	0	0	0	0	0
0,-2,0,15,20	0	0	0	0	0	0	0	0	0	0	1	0	0	0	0	0	0	0	0	0	0
0,2,0,-17,-15	0	0	0	0	0	0	0	0	0	0	0	0	0	0	0	0	0	0	0	1	0
0,2,0,2,0	1	0.666667	0.333333	0	0	0	0	0	0.5	0	0	0.333333	0	1	0	0	0.5	0	0.5	0	0
0,2,0,-2,0	0	0.5	0	0	0	0	0	0	0.666667	0	0	0.666667	0	0	0	0.625	0	0	0	0	0.333333
0,-2,0,2,0	0	0	0	0	0	0	0	0	0	0	0	0.333333	0	0	0	0.578947	0	0	0	0.666667	0.5
0,-2,0,-2,0	0	0.333333	0	0	0	0	0	0	0.153846	0	0	0.142857	0	0.333333	0	0	0.5	0	0	0	0
0,2,0,2,-1	0	0	0.333333	0	0	0	0	0	0.5	0	0	0	0	0	0	0	0.5	0	0	0	0
0,-2,0,2,1	0	0	0	0	0	0	0	0	0	0	0	0	0	0	0	0.0526316	0	0	0	0	0
0,-2,0,-2,1	0	0	0	0	0	0	0	0	0	0	0	0	0	0	0	0	0.5	0	0	0	0
0,-2,0,-2,-1	0	0	0	0	0	0	0	0	0.0769231	0	1	0	0	0.333333	0	0	0	0	0	0	0
0,-2,0,-2,10	0	0	0	0	0	0	0	0	0	0	0	0	0	0	0	0	0	0	1	0	0
0,2,0,2,12	0	0	0	0	0	0	0	0	0	0	0	0	0	0	0	0	0	0	0.5	0	0
0,-2,0,2,13	0	0	0	0	0	0	0	0	0	0	0	0	0	1	0	0	0	0	0	0	0
0,-2,0,-2,-14	0	0	0	0	0	0	0.2	0	0	0	0	0	0	0	0	0	0	0	0	0	0
0,2,0,-2,2	0	0	0	0	0	0	0	0	0	0	0	0	0	0	0	0.125	0	0	0	0	0
0,-2,0,2,-2	0	1	0	0	0	0	0	0	0	0.5	0	0.333333	0	0	0.333333	0.157895	0	0	0	0	0.5
0,-2,0,-2,2	0	0.166667	0	0	0	0	0	0	0	0	0	0.285714	0	0	0	0	0	0.2	0	0	0
0,-2,0,-2,-2	0	0	0	0	0	0	0	0	0.538462	0	0	0	0	0	0	0	0	0	0	0	0
0,-2,0,-2,21	0	0	0	0	0	0	0	0	0	0	0	0	0	0	0	0	0	0.2	0	0	0
0,2,0,2,3	0	0	0	0	1	0	0	0	0	0	0	0	0	0	0	0.285714	0	0	0	0.333333	0
0,2,0,2,-3	0	0.333333	0	0	0	0	0	0	0	0	0	0	0	0	0	0	0	0	0	0	0
0,2,0,-2,3	0	0	0	0	0	0	0	0	0	0.333333	0.5	0	0	0	0	0	0	0	0	0	0
0,2,0,-2,-3	0	0	0	0	1	0	1	0	0	0	0	0	0	0	1	0.125	0	0	0	0	0.166667
0,-2,0,2,3	0	0	0	0	0	1	1	0	0	0.5	0.5	0	1	0	0	0	0	0	0	0	0
0,-2,0,2,-3	0	0	0	0	0	0	0	0	0	0	0	0.333333	0	0	0.333333	0	0	0	0	0	0
0,-2,0,-2,-3	0	0.333333	0	1	0.666667	0	0	0	0.153846	0	0	0.142857	0	0	0	0	0	0	0	0	0.333333
0,2,0,2,4	0	0	0.333333	0	0	0	0	0	0	0	0	0.333333	0	0	0	0.714286	0	0	0	0.333333	1
0,2,0,-2,-4	0	0	0	0	0	0	0	0	0	0	0	0	0	0	0	0	0	0	0	0	0.166667
0,-2,0,2,4	0	0	0	0	0	0	0	0	0	0	0	0	0	0	0	0.105263	0	0	0	0	0
0,-2,0,-2,4	0	0	0	0	0	0	0	0	0	0	0	0	0	0	0	0	0	0	0	0	0.166667
0,-2,0,-2,-4	0	0	0	0	0.333333	0	0.8	0	0.0769231	0	0	0.142857	0.333333	0	0	1	0	0	0	0	0.5
0,2,0,2,5	0	0	0	0	0	0	0	0	0	0	0	0.333333	0	0	0	0	0	1	0	0.333333	0
0,2,0,-2,-5	0	0.5	0	0	0	0	0	0	0.333333	0.333333	0.5	0.333333	0	0	0	0.125	0	0	0	1	0.333333
0,-2,0,2,5	0	0	1	0	0	0	0	0	1	0	0	0	0	0	0	0.0526316	0	0	1	0	0
0,-2,0,2,-5	0	0	0	0	0	0	0	0	0	0	0	0	0	0	0.333333	0.0526316	0	0	0	0	0
0,-2,0,-2,5	0	0	0	0	0	0	0	0	0	0	0	0.142857	0	0	0	0	0	0	0	0	0
0,-2,0,-2,-5	1	0.166667	1	0	0	1	0	0	0	0	0	0	0.333333	0	0	0	0	0.6	0	0	0
0,2,0,-2,-6	0	0	0	0	0	0	0	0	0	0.333333	0	0	0	0	0	0	0	0	0	0	0
0,-2,0,-2,-6	0	0	0	0	0	0	0	0	0	0	0	0	0.333333	0	0	0	0	0	0	0	0
0,2,0,-2,-7	0	0	0	0	0	0	0	1	0	0	0	0	1	0	0	0	0	0	0	0	0
0,-2,0,2,7	0	0	0	0	0	0	0	0	0	0	0	0	0	0	0	0	0	0	0	0.333333	0
0,-2,0,-2,-7	0	0	0	0	0	0	0	0	0	0	0	0.142857	0	0.333333	0	0	0	0	0	0	0
0,-2,0,2,8	0	0	0	0	0	0	0	0	0	0	0.5	0	0	0	0	0	0	0	0	0	0
0,2,0,23,16	0	0	0	0	0	0	0	0	0	0	0	0	0	0	0	0	0	1	0	0	0
0,2,0,-24,-22	0	0	0	0	0	0	0	0	0	0	0	0	0	0	1	0	0	0	0	0	0
0,2,0,-3,0	0	0	1	0	0	0	0	0	0	0	0	0	0	0	0	0	0	0	0	0	0
0,-2,0,3,0	0	0	0	0	0	0	0	0	0	0	0	0.5	0	0	0	0	1	0.5	0	0.333333	0
0,-2,0,-3,0	0	0	0	0	0	0	0	0	0	0	0	0	0	0	1	0	0	0	0	0	0
0,2,0,3,1	0	0	0	0	0	0	0	0	0	0	0	0	0	0	0	0	1	0	0	0	0
0,2,0,-3,1	0	0	0	0	0	0	0	0	0	0	0	0	0	0	0	0	0	0	0	0	0.5
0,2,0,-3,-1	0.333333	0	0	0	0	0	0	0	0	0	0	0	0	0	0	0	0	0	0	0	0
0,-2,0,3,1	0	0	0	0	0	0	0	0	0	0	0	0	0	0	0	0.5	0	0	0	0	0
0,2,0,-3,-10	0	0	0	0	0	0	0	0	0	0	0	0	0	0	0	0	0	0	0	0.25	0
0,-2,0,-3,-10	0	0	0	0	0	0	0	0	1	0	0	0	0	0	0	0	0	0	0	0	0
0,2,0,-3,-12	0	0	0	0	0	0	0	0	0	0	0	0	0	0	0	0	0	0.166667	0	0	0
0,2,0,-3,16	0	0	0	0	0	0	0	0	0	0	0	0	0	0	0	0	0	0.166667	0	0	0
0,2,0,3,2	1	0	1	0	0	0	0	0	0	0	1	0	0	0	0	0	0	0	0	0	0
0,2,0,-3,-2	0.333333	1	0	0	0	0.25	0	0	0	0	0	0	0	0	0	0	0.5	0	0	0	0
0,-2,0,-3,-2	0	0	0	0	0	0	0	0	0	0	0	0	0	0	0	0	0	0	0	1	0
0,2,0,-3,3	0	0	0	0	0	0	0	0	0	0	0	0	0	0.5	0	0	0	0	0	0	0
0,2,0,-3,4	0	0	0	0	0	0	0	0	0	0	0	0	0	0	0	0	0	0.5	0	0	0
0,2,0,-3,-4	0	0	0	0	0	0	0	0	0	0	0	0	0	0.5	0	0	0	0	0	0	0
0,-2,0,3,-4	0	0	0	0	0	0	0	0	0	0	0	0	0	0	0	0	0	0	0	0.666667	0
0,-2,0,-3,-4	0	0	0	0	0	0	0	0	0	0	1	0	0	0	0	0	0	0	0	0	0
0,2,0,-3,-5	0	0	0	0	0	0.25	0	1	0	0	0	0	1	0	0	0	0	0	0	0.25	0
0,-2,0,3,5	0	0	0	0	0	0	0	0	0	0	0	0	1	0	0	0.5	0	0.5	0	0	0
0,-2,0,-3,-5	0	0	0	0	0	0	0	0	0	0	0	1	0	0	0	0	0	0	0	0	0
0,2,0,-3,-6	0	0	0	0	0	0	0	0	0	1	0	0	0	0	0	0	0	0	1	0	0
0,-2,0,3,6	0	0	0	0	0	0	0	0	0	0	0	0.5	0	0	0	0	0	0	0	0	0
0,-2,0,-3,-6	0	0	0	0	0	0	0	0	0	0	0	0	0	0	0	0	0	0	1	0	0
0,2,0,3,7	0	0	0	0	0	0	0	0	0	0	0	0	0	0	0	0	0	0	0	0	1
0,2,0,-3,7	0.333333	0	0	0	0	0	0	0	0	0	0	0	0	0	0	0	0	0	0	0	0
0,2,0,-3,-7	0	0	0	0	0	0.5	0	0	0	0	0	0	0	0	0	0	0.5	0.166667	0	0	0.5
0,-2,0,-3,-7	0	0	1	0	0	0	0	0	0	0	0	0	0	0	0	0	1	0	0	0	0
0,2,0,-3,-8	0	0	0	0	0	0	0	0	0	0	0	0	0	0	0	0	0	0	0	0.25	0
0,-2,0,3,8	0	0	0	0	0	0	0	0	0	0	0	0	0	0	1	0	0	0	0	0	0
0,2,0,-3,9	0	0	0	0	0	0	0	0	0	0	0	0	0	0	0	0	0	0	0	0.25	0
0,2,0,4,0	1	0	0	0	0	0	0	0	0	0	0	0	0	0	0	0	0	0	0	0	0
0,-2,0,4,0	0	0	0	0	0	0	0	0	0	0	0	0	0	0	0	0	0	1	0	0	0
0,-2,0,-4,0	0	0	0	0	0	0	0	0	0	0	0	0	0	0	0	0	1	0	0	0	0
0,2,0,-4,-1	0	0	0	0	0	0	0	0	0	0	0	0	0	0	0	0.333333	0	0	0	0	0
0,2,0,4,12	0	0	0	0	0	0	0	0	0	0	0	0	0	0	0	0	0	1	0	0	0
0,2,0,4,2	0	0	0	0	0	0	0	0	0	0	0	0.5	0	0	0	1	0	0	0	0	0
0,2,0,-4,2	0	0	0	0	0	0	0	0	0	0	0	0	0	0	0	0.333333	0	0	0	0	0
0,-2,0,4,2	0	0	0	0	0	0	0	0	0	0	0	0	0	0	1	0	0	0	0	0	0
0,-2,0,-4,-2	0	0	0	0	0	0	0	0	0	0	0	0	0	0	0	0	0	0	0	0.333333	0
0,2,0,4,4	0	0	0	0	0	0	0	0	0	0	0	0.5	0	0	0	0	0	0	0	0	0
0,2,0,-4,-4	0	0	0	0	0	0	0	0	0	0	0	0	1	0	0	0	0	0	0	0	0
0,-2,0,-4,4	0	0	0	0	0	0	0	0	1	0	0	0	0	0	0	0	0	0	0	0	0
0,-2,0,-4,-4	0	0	1	0	0	0	0	0	0	0	0	0	0	0	0	0	0	0	0	0	0
0,2,0,4,5	0	1	0	0	0	0	0	0	0	0	0	0	0	0	0	0	0	0	0	0	0
0,2,0,-4,-5	0	0	0	0	0	0	0	1	0	0	0	0	0	0	0	0.333333	0	0	0	0	0
0,-2,0,4,5	0	0	0	0	0	0	0	0	0	0	1	0	0	0	0	0	0	0	0	1	0
0,-2,0,-4,5	0	0	0	0	0	0	0	0	0	0	0	0	0	0	1	0	0	0	0	0	0
0,-2,0,-4,-5	0	0	0	0	0	0	0	0	0	0	0	0	0	0	0	0	0	0	0	0.333333	0
0,2,0,4,7	0	0	0	0	0	0	1	0	0	0	0	0	0	0	0	0	0	0	0	0	0
0,-2,0,4,7	0	0	0	0	1	0	0	0	0	0	0	0	0	0	0	0	0	0	0	0	0
0,-2,0,-4,-7	0	1	0	0	0	0	0	0	0	0	0	0	0	0	0	0	0	0	0	0.333333	0
0,-2,0,-5,0	0	0	0	0	0	0	0	0	0	0	0	0	0	0	0	0	1	0	0.5	0	0
0,2,0,-5,-10	0	0	0	0	0	0	0	0	0	0	0	0	0	1	0	0	0	0	0	0	0
0,2,0,-5,2	0	0	0	0	0	0	0	0	1	0	0	0	0	0	0	0	0	0	0	0	0
0,-2,0,-5,-2	0	1	0	0	0	0	0	0	0	0	0	0	0	0	0	0	0	0	0.5	0	1
0,2,0,-5,-3	0	0	0	0	0	0	0	0	0	0	0	1	0	0	0	0	0	0	0	0	0
0,-2,0,5,3	0	0	0	0	0	0	0	0	0	0	0	1	0	0	0	0	0	0	0	0	0
0,2,0,-5,4	0	0	0	0	0	0	0	0	0	0	0	0	0	0	0	0	0	0	1	0	0
0,-2,0,-5,-4	1	0	0	0	0	0	0	0	0	0	0	0	0	0	0	0	0	0	0	0	0
0,2,0,-5,-7	0	0	0	0	0	0	0	0	0	0	0	0	0	0	0	1	0	0	0	0	0
0,2,0,-5,-9	0	1	0	0	0	0	0	0	0	0	0	0	0	0	0	0	0	0	0	0	0
0,2,0,6,2	0	0	0	0	0	0	0	0	0	0	0	0	0	0	0	0	0	0	0	0	1
0,-2,0,-6,-5	0	0	0	0	1	0	0	0	0	0	0	0	0	0	0	0	0	0	0	0	0
0,2,0,-6,-6	0	0	0	0	0	0	0	0	0	0	0	1	0	0	0	0	0	0	0	0	0
0,-2,0,6,8	0	0	0	0	0	0	0	1	0	0	0	0	0	0	0	0	0	0	0	0	0
0,2,0,-7,-10	0	0	0	0	0	0	0	0	0	0	0	0	0	0	0	1	0	0	0	0	0
0,2,0,7,4	1	0	0	0	0	0	0	0	0	0	0	1	0	0	0	0	0	0	0	0	0
0,-2,0,-7,-6	0	0	0	0	0	0	0	0	0	0	0	0	0	0	0	0	1	0	0	0	0
0,2,0,-7,-9	0	0	0	0	0	0	0	1	0	0	0	0	0	0	0	0	0	0	0	0	0
0,-2,0,-9,-4	0	0	0	0	0	0	0	0	1	0	0	0	0	0	0	0	0	0	0	0	0
0,2,0,-9,-6	0	0	0	0	0	0	0	0	0	0	0	0	0	0	0	1	0	0	0	0	0
0,2,0,9,7	0	0	0	0	0	0	0	0	0	0	0	1	0	0	0	0	0	0	0	0	0
0,2,1,0,-1	1	0	0	0	0	0	0	0	1	0	1	0	0	0	0	0	0	0	0	0	0
0,2,-1,0,1	0	0	0	0	0	0	0	0	0.333333	0	0	0	0	0	0	0	0	0	0	0	0
0,2,-1,0,-1	0.2	0	0	0	0	0	0	0	0.333333	0	0	0	0	0	0	0	0	0	0	0	1
0,-2,1,0,-1	0	0	0	0	0	0	0	0	0	0	0.166667	0	0.5	0	0	0	0	0	0	0	0
0,-2,-1,0,-1	0	0	1	0	0	0	0	0	0	0	0	0	0	0	0	0	0	0	0	0	0
0,2,-1,0,2	0.2	0	0	0	0	0	0	0	0	0	0	0	0	0	0	0	0	0	0	1	0
0,-2,1,0,-2	0	1	0	0	0	0	0	0	1	0	0.666667	0	0	0	0	0	0	0	0	0	0.5
0,2,-1,0,-3	0.4	0	0	1	0	0	0	0	0.333333	0	0	0	0	0	0	0	0	0	0	0	0
0,-2,1,0,3	0	0	1	0	0	0	0	0	0	0	0	0	0	0	0	0	0	0	0	0	0.5
0,-2,1,0,-3	1	0	0	0	0	0	0	0	0	0	0	0	0	0	0	0	0	0	0	0	0
0,-2,-1,0,3	1	0	0	0	0	0	1	0	0	0	0	0	0	0	0	0	0	0	0	0	0
0,-2,-1,0,-3	0	0	0	0	0	1	0	0	0	0	0	0	0	0	0	0	0	0	0	0	0
0,2,1,0,-4	0	0	0	0	0	0	0	0	0	1	0	0	0	0	0	0	0	0	0	0	0
0,2,-1,0,-4	0	0	0	0	0	0	0	0	0	0	0	0	0	1	0	0	0	0	0	0	0
0,-2,1,0,-4	0	0	0	0	0	0	0	0	0	0	0	0	0.5	0	0	0	0	0	0	0	0
0,-2,1,0,-5	0	0	0	0	0	0	0	0	0	0	0.166667	0	0	0	0	0	0	0	0	0	0
0,-2,-1,0,-5	0	0	0	0	0	0	0	0	0	0	1	0	0	0	0	0	0	0	0	0	0
0,2,-1,0,-8	0.2	0	0	0	1	0	0	0	0	0	0	0	0	0	0	0	0	0	0	0	0
0,-2,1,1,0	0	0	0	0	0	0	0	0	0	0	0	1	0	0	0	0	0	0	0	0	0
0,-2,1,-1,-1	0	0	0	0	0	0	0	0	0	0	0	0	0	0	0	0	1	0	0	0	0
0,2,1,-1,10	0	0	0	0	0	0	0	0	0	0	0	0	0	1	0	0	0	0	0	0	0
0,2,1,-1,-2	0	0	0	0	0	0	0	0	0	1	0.2	0	0	0	0	0	0	0	0	0	0
0,2,-1,1,2	0	0	0	0	0	0	0	0	1	0	0	0	0	0	0	0	0	0	0	0	0
0,-2,1,-1,-2	0	0	0	0	0	0	0	0	0	0	0	0	1	0	0	0	0	0	0	0	0
0,2,1,-1,3	0	0	0	0	0	0	0	0	0	0	0.8	0	0	0	0	0	0	0	0	0	0
0,2,-1,1,3	0	0	0	0	0	0	0	0	0	0	0	0	0	0	0	0	0	0	0	0	1
0,2,-1,1,-3	0	0	0	0	0	0	0	0	0	0	0	0	0	0	0	0	0	0	0	1	0
0,-2,1,1,-3	0	0	0	1	0	0	0	0	0	0	0	0	0	0	0	0	0	0	0	0	0
0,2,-1,1,6	0	0	0	0	0	0	0	0	0	0	0	0	0	0	0	1	0	0	0	0	0
0,-2,1,-1,-6	0	0	0	0	0	1	0	0	0	0	0	0	0	0	0	0	0	0	0	0	0
0,-2,-1,-1,9	0	0	0	0	0	0	0	0	0	1	0	0	0	0	0	0	0	0	0	0	0
0,-2,-1,10,6	0	0.5	0	0	0	0	0	0	0	0	0	0	0	0	0	0	0	0	0	0	0
0,-2,-1,-10,-7	0	0	0	1	0	0	0	0	0	0	0	0	0	0	0	0	0	0	0	0	0
0,-2,-1,10,8	0	0.5	0	0	0	1	0	0	0	0	0	0	0	0	0	0	0	0	0	0	0
0,-2,-1,11,5	0	0	0	0	0	0	0	0	0	0	1	0	0	0	0	0	0	0	0	0	0
0,2,-1,2,0	0	0	0	0	0	0	0	0	0	0	0	0	0	0	0.5	0	0	0	0	0	0
0,-2,-1,2,0	1	0	0	0	0	0	0	0	0	0	0	0	0	0	0	0	0	0	0	0	0
0,2,-1,2,-1	0	0	0	0	0	0	0	0	0	0	0	0	0	0	0.5	0	0	0	0	0	0
0,-2,-1,2,-1	0	0	0	1	0	0	0	0	0	0	0	0	0	0	0	0	0	0	0	0	0
0,2,-1,-2,-11	0	0	0	0	0	0	0	0	0	0	1	0	0	0	0	0	0	0	0	0	0
0,-2,1,-2,-12	0	0	0	1	0	0	0	0	0	0	0	0	0	0	0	0	0	0	0	0	0
0,2,1,2,-2	0	0	0	0	0	0	0	0	0	0	0	0	0	0	0	0	0	0	0	0	1
0,2,-1,-2,-2	0	0	0	0	0	0	0	0	0	0	0	0	0	0	0	1	0	0	0	0	0
0,2,-1,-2,3	0	0	0	0	0	0.5	0	0	0	0	0	0	0	0	0	0	0	0	0	0	0
0,2,-1,-2,-3	0	0	0	1	0	0.5	1	0	0	0	0	0	0	0	0	0	0	0	0	0	0
0,-2,1,-2,3	0	1	0	0	0	0	0	0	0	0	0	0	0	0	0	0	0	0	0	0	0
0,-2,1,-2,-3	0	0	1	0	0	0	0	0	0	0	0	0	0	0	0	0	0	0	0	0	0
0,-2,-1,-2,-3	1	0	0	0	0	0	0	0	0	0	1	0	0	0	0	0	0	0	0	0	0
0,2,1,2,4	1	0	0	0	0	0	0	0	0	0	0	0	0	0	0	0	0	0	0	0	0
0,2,-1,2,4	0	0	0	0	0	0	0	0	0	0	0	0	0	0	0	0	0	0	0	0	1
0,-2,-1,-2,-4	0	0	0	0	0	0	0	1	1	0	0	0	1	0	0	0	0	0	0	0	0
0,-2,-1,2,5	0	0	0	0	0	1	0	0	0	0	0	0	0	0	0	0	0	0	0	0	0
0,-2,-1,-2,-5	0	0	0	0	0	0	0	0	0	0	0	0	0	0.5	0	0	0	0	0	0	0
0,2,-1,2,6	0	0	0	0	0	0	0	0	0	0	0	0	0	0	0	0	1	0	0	0	0
0,-2,-1,2,6	0	0	0	0	0	0	0	0	0	0	0	0	0	0	0	0	0	0	1	0	0
0,-2,-1,-2,-6	0	0	0	0	0	0	0	0	0	0	0	0	0	0.5	0	0	0	0	0	0	0
0,-2,-1,2,7	0	0	0	0	0	0	0	0	1	0	0	0	0	0	0	0	0	0	0	0	0
0,2,1,3,1	0	0	0	0	0	0	0	0	0	0	0	0	0	0	0	1	0	0	0	0	0
0,-2,1,3,1	0	0	0	0	0	0	0	0	0	0	0	0	0	0	0	0	0	1	1	0	0
0,-2,-1,3,-1	0	0	0	0	0	0	0	0	0	0	0	0	0	1	0	0	0	0	0	0	0
0,-2,-1,-3,-1	0	0	0	0.5	1	0	0	0	0	0	0	0	0	0	0	0	0	0	0	0	0
0,2,1,3,-14	0	0	0	0	0	0	0	0	0	0	1	0	0	0	0	0	0	0	0	0	0
0,2,-1,-3,-15	0	0	0	0	0	0	0	0	0	0	0	0	0	0	0	0	1	0	0	0	0
0,-2,-1,-3,2	0	0	0	0	0	0	0.5	0	0	0	0	0	0	0	0	0	0	0	0	0	0
0,-2,-1,-3,-2	0	0	0	0	0	0	0	0	0	0	1	0	0	0	0	0	0	0	0	0	0
0,2,-1,-3,-4	0	0	0	0	0	1	0.5	0	0	0	0	0	0	0	0	0	0	0	0	0	0
0,-2,1,-3,-4	0	0	0	1	0	0	0	0	0	0	0	0	0	0	0	0	0	0	0	0	0
0,-2,-1,-3,-4	1	1	1	0	0	1	0	0	0	0	0	0	0	0	0	0	0	0	0	0	0
0,2,-1,-3,-5	0	0	0	0	0	0	0	0	0	0	0	1	0	0	0	0	0	0	1	0	0
0,-2,-1,-3,-5	0	0	0	0.5	0	0	0.5	0	0	0	0	0	1	0	0	0	1	0	0	0	0
0,2,1,-3,-6	0	0	0	0	0	0	0	0	0	0	0	0	0	0	1	0	0	0	0	0	0
0,-2,-1,3,6	0	0	0	0	0	0	1	0	0	0	0	0	0	0	0	0	0	0	0	0	0
0,2,1,-3,-8	0	0	0	0	0	0	0	0	0	0	0	0	0	0	0	0	0	0	1	0	0
0,2,-1,-3,-8	0	0	0	0	0	0	0.5	0	0	0	0	0	0	0	0	0	0	0	0	0	0
0,2,-1,-4,0	0	0	0	0	0	0	0	0	0	0	0	0	0	0	0	0	0	0	1	0	0
0,2,1,4,1	0	0	0	0	0	0	0	0	0	1	0	0	0	0	0	0	0	0	0	0	0
0,2,-1,-4,1	0	0	0	0	0	0	0	0	0	0	0	0	0	0	0	0	1	0	0	0	0
0,-2,1,-4,1	0	0	0	0	0	0	0	0	0	0	0	0	1	0	0	0	0	0	0	0	0
0,-2,1,-4,-1	0	0	0	0	0	0	0	0	0	0	0	0	0	1	0	0	0	0	0	0	0
0,-2,-1,4,-1	0	0	0	0	0	0.5	0	0	0	0	0	0	0	0	0	0	0	0	0	0	0
0,-2,-1,-4,-1	0	0	0	0	0	0	0	0	0	0	0.5	0	0	0	0	0	0	0	0	0	0
0,2,-1,4,2	0	0	0	0	0	0	0	0	0	0	0	0	0	0	0	0	0	0	1	0	0
0,-2,-1,-4,-2	0	0	0	0	0	0	0	0	0	0	0	0	0	0	1	0	0	0	0	0	0
0,2,1,-4,-3	0	0	0	0	0	0	0	0	0	0	0	0	0	1	0	0	0	0	0	0	0
0,-2,-1,-4,-3	0	0	0	1	0	0	0	0	0	0	0.5	0	0	0	0	0	0	0	0	0	0
0,2,1,4,4	0	0	0	0	0	0	0	0	0	0	0	0	0	0	0	1	0	0	0	0	0
0,2,-1,-4,-5	0	0	0	0	0	0	0	0	0	1	0	0	0	0	0	0	0	0	0	0	0
0,-2,-1,-4,-5	0	1	0	0	0	1	1	0	0	0	0	0	0	0	0	0	0	0	0	0	0
0,-2,-1,4,7	0	0	0	0	1	0.5	0	0	0	0	0	0	0	0	0	0	0	0	0	0	0
0,2,1,4,8	0	0	0	0	0	0	0	0	0	0	0	0	0	0	0	0	0	0	0	0	1
0,2,-1,4,8	0	0	0	0	0	0	0	0	0	0	0	0	0	0	0	0	1	0	0	0	0
0,-2,1,5,0	0	0	0	0	0	0	0	0	0	0	0	0	0	0	0	0	0	0	0	0	0.5
0,-2,1,5,1	0	0	0	0	0	0	0	0	0	0	0	0	0	0	0	0	0	0	0	0	0.5
0,2,-1,-5,-10	0	0	0	0	0	0	0	0	0	0	0	0	0	0	0	0	0	0	1	0	0
0,2,-1,-5,-2	0	0	0	0	0	0	0	0	0	0	0	0	0	0	0	0.4	0	0	0	0	0
0,2,-1,-5,-3	0	0	0.5	0	0	0	0	0	0	0	0	0	0	0	1	0.2	0.5	0	0	0	0
[truncated: 4,021 more rows]

## Sheet: 5th-order
	Evans_No1	Evans_No2	Evans_No3	Evans_No4	Evans_No5	Evans_No6	Evans_No7	Hancock_No1	Hancock_No2	Hancock_No3	Hancock_No4	Hancock_No5	Hancock_No6	Hancock_No7	Tyner_No1	Tyner_No2	Tyner_No3	Tyner_No4	Tyner_No5	Tyner_No6	Tyner_No7
0,0,0,0,0,0	0	0	0	0	0	0	0	0	0	0.666667	0.5	0	0	0	0	0.5	0	0	0.882353	0	0
0,0,0,0,0,1	0	0	0	0	0	0	0	0	0	0	0.166667	0	0.5	0	0	0	0	0	0	0	0
0,0,0,0,0,2	0	0	0	0	0	0	0	0	0	0.333333	0	0	0	0	0	0.25	0	0	0	0	0
0,0,0,0,0,-2	0	0	0	0	0	0	0	0	0	0	0.333333	0	0	0	0	0	0	0	0	0	0
0,0,0,0,0,-20	0	0	0	0	0	0	0	0	0	0	0	0	0	0	0	0	0	0	0.0588235	0	0
0,0,0,0,0,3	0	0	0	0	0	0	0	0	0	0	0	0	0	0	0	0.25	0	0	0	0	0
0,0,0,0,0,5	0	0	0	0	0	0	0	0	0	0	0	1	0	0	0	0	0	0	0	0	0
0,0,0,0,0,-5	0	0	0	0	0	0	0	0	0	0	0	0	0	0	0	0	0	0	0.0588235	0	0
0,0,0,0,0,-6	0	0	0	0	0	0	0	0	0	0	0	0	0	0	0	0	1	0	0	0	0
0,0,0,0,0,7	0	0	0	0	0	0	0	0	0	0	0	0	0.5	0	0	0	0	0	0	0	0
0,0,0,0,1,0	0	0	0	0	0	0	0	0	0	0	0	0	0.5	0	0	0	0	0	0	0	0
0,0,0,0,1,1	0	0	0	0	0	0	0	0	0	0	1	0	0	0	0	0	0	0	0	0	0
0,0,0,0,-1,2	0	0	0	0	0	0	0	0	0	0	0	0	0	0	0	0	1	0	0	0	0
0,0,0,0,1,3	0	0	0	0	0	0	0	0	0	0	0	0	0.5	0	0	0	0	0	0	0	0
0,0,0,0,-11,-13	0	0	0	0	0	0	0	0	0	0	0	0	0	0	0	0	1	0	0	0	0
0,0,0,0,2,0	0	0	0	0	0	0	0	0	0	1	0	0	0	0	0	1	0	0	0	0	0
0,0,0,0,-2,0	0	0	0	0	0	0	0	0	0	0	1	0	0	0	0	0.5	0	0	0	0	0
0,0,0,0,-2,-2	0	0	0	0	0	0	0	0	0	0	0	0	0	0	0	0.5	0	0	0	0	0
0,0,0,0,-2,-4	0	0	0	0	0	0	0	0	0	0	0	0	0	0	0	0	1	0	0	0	0
0,0,0,0,-20,-15	0	0	0	0	0	0	0	0	0	0	0	0	0	0	0	0	0	0	1	0	0
0,0,0,0,3,0	0	0	0	0	0	0	0	0	0	0	0	0	0	0	0	1	0	0	0	0	0
0,0,0,0,-3,0	0	0	0	0	0	0	0	0	0	0	0	0	0	0	0	0	0	0	0	0	1
0,0,0,0,3,5	0	0	0	0	0	0	0	0	0	0	0	0	0	0	1	0	0	0	0	0	0
0,0,0,0,-4,0	0	0	0	0	0	0	0	1	0	0	0	0	0	0	0	0	0	0	0	0	0
0,0,0,0,-4,3	0	0	0	0	0	0	0	0	0	0	0	0	0	0	0	0	0	1	0	0	0
0,0,0,0,-4,-3	0	0	0	0	0	0	0	0	0	0	0	0	0	0	0	0	0	0	0	0	1
0,0,0,0,-5,0	0	0	0	0	0	0	0	0	0	0	0	0	0	0	0	0	0	0	1	0	0
0,0,0,0,5,10	0	0	0	0	0	0	0	0	0	0	1	0	0	0	0	0	0	0	0	0	0
0,0,0,0,5,3	0	0	0	0	0	0	0	0	0	0	0	1	0	0	0	0	0	0	0	0	0
0,0,0,0,-6,-2	0	0	0	0	0	0	0	0	0	0	0	0	0	0	0	0	1	0	0	0	0
0,0,0,0,-7,-10	0	0	0	0	0	0	0	0	0	0	0	1	0	0	0	0	0	0	0	0	0
0,0,0,0,7,5	0	0	0	0	0	0	0	0	0	0	0	0	1	0	0	0	0	0	0	0	0
0,0,0,0,9,5	0	0	0	0	0	0	0	0	0	0	0	0	1	0	0	0	0	0	0	0	0
0,0,0,1,0,0	0	0	0	0	0	0	0	0	0	0	0	0	1	0	0	0	0	0	0	0	1
0,0,0,1,1,1	0	0	0	0	0	0	0	0	0	0	1	0	0	0	0	0	0	0	0	0	1
0,0,0,1,-1,-1	0	0	0	0	0	0	0	0	0	0	1	0	0	0	0	0	0	0	0	0	0
0,0,0,-1,2,2	0	0	0	0	0	0	0	0	0	0	0	0	0	0	0	0	1	0	0	0	0
0,0,0,1,3,1	0	0	0	0	0	0	0	0	0	0	0	0	1	0	0	0	0	0	0	0	0
0,0,0,-1,-4,-3	0	0	0	0	0	0	0	0	0	0	0	0	0	0	0	0	0	0	0	1	0
0,0,0,1,-7,-7	0	0	0	0	0	0	0	0	1	0	0	0	0	0	0	0	0	0	0	0	0
0,0,0,-11,0,0	0	0	0	0	0	0	0	0	0	0	0	0	0	1	0	0	0	0	0	0	0
0,0,0,-11,-13,-15	0	0	0	0	0	0	0	0	0	0	0	0	0	0	0	0	1	0	0	0	0
0,0,0,2,0,0	0	0	0	0	0	0	0	0	0	0	0	0	0	0	0	0.5	0	0	0	0	0
0,0,0,2,0,-1	0	1	0	0	0	0	0	0	0	0	0	0	0	0	0	0	0	0	0	0	0
0,0,0,-2,0,1	0	0	0	0	0	0	0	0	0	0	0.333333	0	0	0	0	1	0	0	0	0	0
0,0,0,2,0,-2	0	0	0	0	0	0	0	0	0	1	0	0	0	0	0	0	0	0	0	0	0
0,0,0,-2,0,2	0	0	0	0	0	0	0	0	0	0	0.333333	0	0	0	0	0	0	0	0	0	0
0,0,0,-2,0,4	0	0	0	0	0	0	0	0	0	0	0.333333	0	0	0	0	0	0	0	0	0	0
0,0,0,2,0,-7	0	0	0	0	0	0	0	0	0	0	0	0	0	0	0	0.5	0	0	0	0	0
0,0,0,2,-1,-5	0	0	0	0	0	0	0	0	0	0	0	0	0	0	0	1	0	0	0	0	0
0,0,0,-2,-2,-2	0	0	0	0	0	0	0	0	0	0	0	0	0	0	0	0.5	0	0	0	0	0
0,0,0,2,2,4	0	0	0	0	0	0	0	0	0	0	0	0	0	0	0	1	0	0	0	0	0
0,0,0,2,-2,5	0	0	0	0	0	0	0	0	0	0	0	0	0	0	0	1	0	0	0	0	0
0,0,0,-2,-2,-5	0	0	0	0	0	0	0	0	0	0	0	0	0	0	0	0.5	0	0	0	0	0
0,0,0,-2,-2,-7	0	0	0	0	0	0	0	0	1	0	0	0	0	0	0	0	0	0	0	0	0
0,0,0,-2,-3,2	0	0	0	0	0	0	0	0	0	0	0	0	0	0	0	0	1	0	0	0	0
0,0,0,-2,-4,-2	0	0	0	0	0	0	0	0	0	0	0	0	0	0	0	0	0	1	0	0	0
0,0,0,-2,-4,-4	0	0	0	0	0	0	0	0	0	0	0	0	0	0	0	0	1	0	0	0	0
0,0,0,2,4,6	0	0	1	0	0	0	0	0	0	0	0	0	0	0	0	0	0	0	0	0	0
0,0,0,-2,5,-2	0	1	0	0	0	0	0	0	0	0	0	0	0	0	0	0	0	0	0	0	0
0,0,0,2,-5,-3	0	0	0	0	0	0	0	0	1	0	0	0	0	0	0	0	0	0	0	0	0
0,0,0,-20,-15,-8	0	0	0	0	0	0	0	0	0	0	0	0	0	0	0	0	0	0	1	0	0
0,0,0,3,0,0	0	0	0	0	0	0	0	0	0	0	0	0	0	0	0	0.5	0	0	0	0	0
0,0,0,-3,0,0	0	0	0	0	0	0	0	1	0	0	0	0	0	0	0	0	0	0	0	0	0.5
0,0,0,-3,0,-4	0	0	0	0	0	0	0	0	0	0	0	0	0	0	0	0	0	0	0	0	0.5
0,0,0,3,0,-9	0	0	0	0	0	0	0	0	0	0	0	0	0	0	0	0.5	0	0	0	0	0
0,0,0,3,1,0	0	0	0	0	0	0	0	0	0	0	0	0	0.5	0	0	0	0	0	0	0	0
0,0,0,3,1,-6	0	0	0	0	0	0	0	0	0	0	0	0	0.5	0	0	0	0	0	0	0	0
0,0,0,3,3,3	0	0	0	0	0	0	0	0	0	0	0	0	0	0	0	1	0	0	0	0	0
0,0,0,-3,-3,-3	0	0	0	0	0	0	0	0	0	0	1	0	0	0	0	0	0	0	0	0	0
0,0,0,3,5,3	0	0	0	0	0	0	0	0	0	0	0	0	0	0	0.333333	0	0	0	0	0	0
0,0,0,3,5,7	0	0	0	0	0	0	0	0	0	0	0	0	0	0	0.666667	0	0	0	0	0	0
0,0,0,-3,-5,-7	0	0	0	0	0	0	0	0	0	0	0	0	0	0	0	1	0	0	0	0	0
0,0,0,-3,-6,-10	0	0	0	0	0	0	0	0	0	0	0	0	0	1	0	0	0	0	0	0	0
0,0,0,3,7,0	0	1	0	0	0	0	0	0	0	0	0	0	0	0	0	0	0	0	0	0	0
0,0,0,3,-9,-12	0	0	0	0	0	0	0	0	0	0	0	0	0	0	0	1	0	0	0	0	0
0,0,0,-4,0,-2	0	0	0	0	0	0	0	0.333333	0	0	0	0	0	0	0	0	0	0	0	0	0
0,0,0,-4,0,3	0	0	0	0	0	0	0	0.333333	0	0	0	0	0	0	0	0	0	0	0	0	0
0,0,0,-4,0,4	0	0	0	0	0	0	0	0.333333	0	0	0	0	0	0	0	0	0	0	0	0	0
0,0,0,-4,-16,4	0	0	0	0	0	0	0	0	0	1	0	0	0	0	0	0	0	0	0	0	0
0,0,0,-4,-3,14	0	0	0	0	0	0	0	0	0	0	0	0	0	0	0	0	0	0	0	0	1
0,0,0,-4,3,3	0	0	0	0	0	0	0	0	0	0	0	0	0	0	0	0	0	1	0	0	0
0,0,0,4,4,9	0	0	0	0	0	0	0	1	0	0	0	0	0	0	0	0	0	0	0	0	0
0,0,0,-4,-7,-2	0	0	0	0	0	0	0	0	0	0	1	0	0	0	0	0	0	0	0	0	0
0,0,0,-5,0,0	0	0	0	0	0	0	0	0	0	0	0	0	0	0	0	0	0	0	1	0	0
0,0,0,5,0,5	0	0	0	0	0	0	0	1	0	0	0	0	0	0	0	0	0	0	0	0	0
0,0,0,5,10,12	0	0	0	0	0	0	0	0	0	0	1	0	0	0	0	0	0	0	0	0	0
0,0,0,5,3,3	0	0	0	0	0	0	0	0	0	0	0	1	0	0	0	0	0	0	0	0	0
0,0,0,5,5,-1	0	0	0	0	0	0	0	0	0	0	0	0	0	0	0	0	1	0	0	0	0
0,0,0,5,5,8	0	0	0	0	0	0	0	0	0	0	0	0	0	0	0	1	0	0	0	0	0
0,0,0,-6,-2,0	0	0	0	0	0	0	0	0	0	0	0	0	0	0	0	0	1	0	0	0	0
0,0,0,-6,4,4	0	0	0	0	0	0	0	0	0	0	0	0	0	0	0	0	0	0	0	0	1
0,0,0,-6,-6,-3	0	0	0	0	0	0	0	0	0	0	0	0	0	0	0	1	0	0	0	0	0
0,0,0,-7,-10,-10	0	0	0	0	0	0	0	0	0	0	0	1	0	0	0	0	0	0	0	0	0
0,0,0,7,3,-1	0	1	0	0	0	0	0	0	0	0	0	0	0	0	0	0	0	0	0	0	0
0,0,0,7,5,0	0	0	0	0	0	0	0	0	0	0	0	0	1	0	0	0	0	0	0	0	0
0,0,0,7,5,-7	0	0	0	0	0	0	0	0	0	1	0	0	0	0	0	0	0	0	0	0	0
0,0,0,7,7,7	0	0	0	0	0	0	0	0	0	0	0	0	0	0	0	1	0	0	0	0	0
0,0,0,9,0,0	0	0	0	0	0	0	0	0	0	0	0	1	0	0	0	0	0	0	0	0	0
0,0,0,-9,0,0	0	0	0	0	0	0	0	0	0	0	0	0	0	0	0	0	0	0	0	0	1
0,0,0,9,5,9	0	0	0	0	0	0	0	0	0	0	0	0	1	0	0	0	0	0	0	0	0
0,0,0,-9,-6,-4	0	0	0	0	0	0	0	0	0	0	0	0	0	0	0	0	1	0	0	0	0
0,0,0,-9,-7,-9	0	0	0	0	0	0	0	1	0	0	0	0	0	0	0	0	0	0	0	0	0
0,0,1,0,0,1	0	0	0	0	0	0	0	0	0	0	0	0	1	0	0	0	0	0	0	0	0
0,0,1,0,0,-2	0	0	0	0	0	0	0	0	0	0	1	0	0	0	0	0	0	0	0	0	0
0,0,1,0,0,-21	0	0	0	0	0	0	0	0	0	0	0	0	0	0	0	0	0	0	0	0	1
0,0,1,0,0,-3	0	0.5	0	0	0	0	0	0	0	0	0	0	0	0	0	0	0	0	0	0	0
0,0,1,0,0,-4	0	0.5	0	0	0	0	0	0	0	0	0	0	0	0	0	0	0	0	0	0	0
0,0,1,0,-1,0	0	0	0	0	0	0	0	0	0	0	1	0	0	0	0	0	0	0	0	0	0
0,0,-1,0,1,1	0	0	0	0	0	0	0	0	0	0	0	0	0	1	0	0	0	0	0	0	0
0,0,-1,0,-1,-1	0	0	0	0	0	0	0	0	0.666667	0	0	0	0	0	0	0	0	0	0	0	0
0,0,-1,0,-1,-2	0	0	0	0	0	0	0	0	0.333333	0	1	0	0	0	0	0	0	0	0	0	0
0,0,1,0,-2,0	0	0	0	0	0	0	0	0	0	0	1	0	0	0	0	0	0	0	0	0	0
0,0,-1,0,2,-1	0	0	0	0	0	0	0	0	0	0	0	0	0	1	0	0	0	0	0	0	0
0,0,-1,0,2,3	0	0	0	0	0	1	0	0	0	0	0	0	0	0	0	0	0	0	0	0	0
0,0,1,0,-2,-4	0	1	0	0	0	0	0	0	0	0	0	0	0	0	0	0	0	0	0	0	0
0,0,1,0,-2,-6	0	0	1	0	0	0	0	0	0	0	0	0	0	0	0	0	0	0	0	0	0
0,0,1,0,3,4	0	0	0	0	0	0	0	0	0	0	1	0	0	0	0	0	0	0	0	0	0
0,0,1,0,-4,-7	0	0	0	0	0	0	0	0	0	0	0	0	1	0	0	0	0	0	0	0	0
0,0,1,0,-4,-8	0	0	0	0	0	0	0	0	0	0	0	0	0	0	0	0	0	1	0	0	0
0,0,-1,0,-8,-10	0	0	1	0	0	0	0	0	0	0	0	0	0	0	0	0	0	0	0	0	0
0,0,1,1,0,1	0	0	1	0	0	0	0	0	0	0	0	0	0	1	0	0	0	0	0	0	0
0,0,1,-1,0,1	0	0	1	0	0	0	0	0	0	0	0	0	0	0	0	0	0	0	0	0	0
0,0,1,1,1,1	0	0	0	0	0	0	0	0	0	0	1	0	0	0	0	0	0	0	0	0	1
0,0,1,-1,-1,-1	0	0	0	0	0	0	0	0	0	0	1	0	0	0	0	0	0	0	0	0	0
0,0,-1,1,-1,-2	0	0	0	0	0	0	0	0	0	0	1	0	0	0	0	0	0	0	0	0	0
0,0,-1,-1,-1,-3	0	0	0	0	0	0	0	0	0	0	0	0	0	0	0	1	0	0	0	0	0
0,0,-1,-1,-2,-2	0	0	0	0	0	0	0	0	0	0	1	0	0	0	0	0	0	0	0	0	0
0,0,1,1,-2,-3	0	1	0	0	0	0	0	0	0	0	0	0	0	0	0	0	0	0	0	0	0
0,0,-1,-1,2,-3	0	0	0	0	0	0	0	0	0	0	0	0	0	0	0	0	0	0	1	0	0
0,0,-1,-1,-3,-1	0	0	0	0	0	0	0	0	1	0	0	0	0	0	0	0	0	0	0	0	0
0,0,1,1,3,3	0	1	0	0	0	0	0	0	1	0	0	0	0	0	0	0	0	1	0	0	0
0,0,-1,-1,-3,-3	0	0	0	0	0	0	0	0	0	0	1	0	0	0	0	0	0	0	0	0	0
0,0,1,-1,-3,-4	0	0	0	0	0	0	0	0	1	0	0	0	0	0	0	0	0	0	0	0	0
0,0,1,1,3,6	0	0	0	0	0	0	0	0	0	0	0	0	0	0	0	1	0	0	0	0	0
0,0,1,1,4,4	0	0	0	0	0	0	0	0	0	0	1	0	0	0	0	0	0	0	0	0	0
0,0,-1,-10,-6,-4	0	0	0	0	0	0	0	0	0	0	0	0	0	0	0	0	0	0	0	0	1
0,0,1,2,1,-1	0	0	0	0	0	0	0	0	0	0	0	0	0	1	0	0	0	0	0	0	0
0,0,-1,2,1,1	0	0	0	0	0	0	0	0	0	0	0	0	0	0	0	0	0	0	0	0	1
0,0,-1,-2,12,8	0	0	0	0	1	0	0	0	0	0	0	0	0	0	0	0	0	0	0	0	0
0,0,-1,2,2,2	0	0	0	0	0	0	0	0	0	0	0	0	0	0	0	0	1	0	0	0	0
0,0,1,2,-2,-5	0	0	1	0	0	0	0	0	0	0	0	0	0	0	0	0	0	0	0	0	0
0,0,-1,-2,-3,-2	0	0	0	0	0	0	0	0	0	0	0	0	0	1	0	0	0	0	0	0	0
0,0,1,2,3,4	0	0	0	0	0	0	0	0	0	0	1	0	0	0	0	0	0	0	0	0	0
0,0,1,2,3,5	0	0	0	0	0	0	0	0	0	0	0	0	0	0	0	0	0	0	0	0	1
0,0,1,2,3,6	0	0	0	1	0	0	0	0	0	0	0	0	0	0	0	0	0	0	0	0	0
0,0,-1,2,-3,-6	0	0	0	0	0	0	0	0	1	0	0	0	0	0	0	0	0	0	0	0	0
0,0,1,-2,-4,-3	0	0	0	1	0	0	0	0	0	0	0	0	0	0	0	0	0	0	0	0	0
0,0,1,2,5,2	0	0	0	0	0	0	0	0	0	0	0	0	0	0	0	0	0	1	0	0	0
0,0,1,-2,-7,-11	0	0	1	0	0	0	0	0	0	0	0	0	0	0	0	0	0	0	0	0	0
0,0,1,-2,-8,-4	0	0	0	0	0	0	0	0	0	0	0	0	0	0	0	1	0	0	0	0	0
0,0,-1,-3,0,0	0	0	0	0	0	0	0	0	0	0	0	1	0	0	0	0	0	0	0	0	0
0,0,1,3,1,0	0	1	0	0	0	0	0	0	0	0	0	0	0	0	0	0	0	0	0	0	0
0,0,1,3,1,-2	0	0	0	0	0	0	0	0	0	0	0	0	1	0	0	0	0	0	0	0	0
0,0,1,-3,1,2	0	0	0	0	0	0	0	0	0	0	0	0	1	0	0	0	0	0	0	0	0
0,0,-1,-3,-1,-3	0	0	0	0	0	0	0	0	0	0	0	1	0	0	0	0	0	0	0	0	0
0,0,1,3,-2,0	0	0	0	0	0	0	0	0	0	0	1	0	0	0	0	0	0	0	0	0	0
0,0,1,-3,-2,0	0	0	0	0	1	0	0	0	0	0	0	0	0	0	0	0	0	0	0	0	0
0,0,-1,-3,2,3	0	0	0	0	0	0	0	0	0	0	0	0	0	0	0	1	0	0	0	0	0
0,0,1,3,3,4	0	0	0	0	0	0	0	0	0	0	1	0	0	0	0	0	0	0	0	0	0
0,0,1,3,4,-2	0	0	0	0	0	0	0	0	0	0	1	0	0	0	0	0	0	0	0	0	0
0,0,1,3,5,7	0	0	0	0	0	0	0	0	1	0	0	0	0	0	0	0	0	0	0	0	0
0,0,1,3,6,6	0	0	0	0	0	0	0	0	0	0	1	0	0	0	0	0	0	0	0	0	0
0,0,1,3,8,3	0	0	0	0	0	0	0	0	0	0	0	0	0	1	0	0	0	0	0	0	0
0,0,-1,-4,-3,-18	0	0	0	0	0	0	0	0	0	0	0	0	0	0	0	0	0	0	0	1	0
0,0,1,4,4,4	0	0	0	0	0	0	0	0	0	0	1	0	0	0	0	0	0	0	0	0	0
0,0,1,-4,-4,-6	0	0	0	1	0	0	0	0	0	0	0	0	0	0	0	0	0	0	0	0	0
0,0,1,4,5,7	0	1	0	0	0	0	0	0	0	0	0	0	0	0	0	0	0	0	0	0	0
0,0,1,4,7,9	0	0	0	0	0	0	0	0	0	0	0	0	0	0	0	0	1	0	0	0	0
0,0,1,4,8,11	0	0	0	0	0	1	0	0	0	0	0	0	0	0	0	0	0	0	0	0	0
0,0,1,5,7,9	0	0	0	0	0	0	0	0	0	0	0	0	0	0	0	1	0	0	0	0	0
0,0,1,5,8,12	0	0	0	0	1	0	0	0	0	0	0	0	0	0	0	0	0	0	0	0	0
0,0,-1,-5,-8,-12	0	1	0	0	0	0	0	0	0	0	0	0	0	0	0	0	0	0	0	0	0
0,0,1,5,8,7	0	0	0	0	0	0	0	0	0	0	0	0	0	0	0	0	0	0	0	1	0
0,0,1,5,9,12	0	0	0	0	0	0	1	0	0	0	0	0	0	0	0	0	0	0	0	0	0
0,0,-1,-7,-2,-4	0	0	0	0	0	0	0	0	0	0	0	0	0	0	0	0	0	0	1	0	0
0,0,1,-7,-7,-23	0	0	0	0	0	0	0	0	1	0	0	0	0	0	0	0	0	0	0	0	0
0,0,-10,0,0,-3	0	0	0	0	0	0	0	0	0	0	0	0	0	0	0	1	0	0	0	0	0
0,0,10,12,10,7	0	0	0	0	0	0	0	1	0	0	0	0	0	0	0	0	0	0	0	0	0
0,0,10,4,22,16	0	0	0	0	0	0	0	0	0	1	0	0	0	0	0	0	0	0	0	0	0
0,0,-11,0,0,-11	0	0	0	0	0	0	0	0	0	0	0	0	0	1	0	0	0	0	0	0	0
0,0,-11,0,1,1	0	0	0	0	0	0	0	0	0	0	0	0	0	1	0	0	0	0	0	0	0
0,0,-11,-13,-15,-17	0	0	0	0	0	0	0	0	0	0	0	0	0	0	0	0	1	0	0	0	0
0,0,-11,-7,-5,-2	0	0	0	0	0	0	0	0	0	0	0	0	0	0	0	1	0	0	0	0	0
0,0,-12,-12,-10,-14	0	0	0	0	0	0	0	0	0	0	0	0	0	0	0	0	1	0	0	0	0
0,0,12,12,11,2	0	0	0	0	0	0	0	0	0	0	0	0	0	0	0	0	0	0	0	0	1
0,0,12,12,11,5	0	0	0	0	0	0	0	0	0	0	0	0	0	0	0	0	0	0	1	0	0
0,0,-12,-14,-16,-20	0	0	0	0	0	0	0	0	0	1	0	0	0	0	0	0	0	0	0	0	0
0,0,-12,-14,-19,1	0	0	0	0	0	0	0	0	0	0	0	0	0	1	0	0	0	0	0	0	0
0,0,-12,-3,-15,3	0	0	0	0	0	0	0	0	0	0	0	0	0	0	0	0	0	0	0	1	0
0,0,-12,-7,-6,0	0	0	0	0	0	0	0	1	0	0	0	0	0	0	0	0	0	0	0	0	0
0,0,12,8,5,15	0	0	0	0	0	1	0	0	0	0	0	0	0	0	0	0	0	0	0	0	0
0,0,12,9,4,0	0	0	0	0	0	0	0	0	0	0	1	0	0	0	0	0	0	0	0	0	0
0,0,13,3,8,13	0	1	0	0	0	0	0	0	0	0	0	0	0	0	0	0	0	0	0	0	0
0,0,-14,-10,-12,-10	0	0	0	0	0	0	0	0	0	0	0	0	0	0	0	1	0	0	0	0	0
0,0,14,12,10,14	0	0	0	0	0	0	0	0	0	0	0	0	0	0	0	0	1	0	0	0	0
0,0,15,14,7,2	0	0	0	0	0	0	0	0	1	0	0	0	0	0	0	0	0	0	0	0	0
0,0,-16,-11,-8,-9	0	0	0	0	0	0	0	0	1	0	0	0	0	0	0	0	0	0	0	0	0
0,0,16,15,10,5	0	0	0	0	0	0	0	0	1	0	0	0	0	0	0	0	0	0	0	0	0
0,0,-17,-15,-13,-15	0	0	0	0	0	0	0	0	0	0	0	0	0	0	0	0	0	0	0	0	1
0,0,17,17,17,17	0	0	0	0	0	0	0	0	0	0	0	0	0	0	1	0	0	0	0	0	0
0,0,-2,0,0,1	0	0	0	0	0	0	0	0	0	0	1	0	0	0	0	0	0	0	0	0	0
0,0,2,0,0,2	0	0	0	0	0	0	0	0	0	0	0	0	0	0	0	1	0	0	0	0	0
0,0,2,0,-1,0	0	1	0	0	0	0	0	0	0	0	0	0	0	0	0	0	0	0	0	0	0
0,0,-2,0,1,0	0	0	0	0	0	0	0	0	0	0	1	0	0	0	0	0	0	0	0	0	0
0,0,-2,0,1,1	0	0	0	0	0	0	0	0	0	0	0	0	0	0	0	0.666667	0	0	0	0	0
0,0,-2,0,1,3	0	0	0	0	0	0	0	0	0	0	0	0	0	0	0	0	0	0	0	1	0
0,0,-2,0,1,5	0	0	0	0	0	0	0	0	0	0	0	0	0	0	0	0.333333	0	0	0	0	0
0,0,-2,0,12,9	0	0	0	0	0	0	0	0	0	0	1	0	0	0	0	0	0	0	0	0	0
0,0,2,0,-2,0	0	1	0	0	0	0	0	0	0	0	0	0	0	0	0	0.5	0	0	0	0	0
0,0,-2,0,2,0	0	0	0	0	0	0	0	0	0	0	0	0	0	0	0	0.5	0	0	0	0	0
0,0,-2,0,-2,0	0	0	0	0	0	0	0	0	0.142857	0	0	0	0	1	0	0	0	0	0	0	0
0,0,-2,0,-2,-1	0	0	0	0	0	0	0	0	0	0	1	0	0	0	0	0	0	0	0	0	0
0,0,-2,0,2,13	0	0	0	0	0	0	0	0	0	0	0	0	0	1	0	0	0	0	0	0	0
0,0,2,0,-2,2	0	0	0	0	0	0	0	0	0	0	0	0	0	0	0	0.5	0	0	0	0	0
0,0,-2,0,2,-2	0	1	0	0	0	0	0	0	0	0	0	0	0	0	0	0	0	0	0	0	0
0,0,-2,0,-2,-2	0	0	0	0	0	0	0	0	0.714286	0	0	0	0	0	0	0	0	0	0	0	0
0,0,2,0,-2,3	0	0	0	0	0	0	0	0	0	1	0	0	0	0	0	0	0	0	0	0	0
0,0,-2,0,2,3	0	0	0	0	0	0	0	0	0	0	0.5	0	0	0	0	0	0	0	0	0	0
0,0,-2,0,-2,-3	0	0	0	0	0	0	0	0	0.142857	0	0	0	0	0	0	0	0	0	0	0	0
0,0,-2,0,-2,-4	0	0	0	0	0	0	0	0	0	0	0	0	0.5	0	0	0	0	0	0	0	0
0,0,-2,0,2,-5	0	0	0	0	0	0	0	0	0	0	0	0	0	0	0	0.5	0	0	0	0	0
0,0,-2,0,-2,-6	0	0	0	0	0	0	0	0	0	0	0	0	0.5	0	0	0	0	0	0	0	0
0,0,-2,0,2,8	0	0	0	0	0	0	0	0	0	0	0.5	0	0	0	0	0	0	0	0	0	0
0,0,2,0,-3,-6	0	0	0	0	0	0	0	0	0	1	0	0	0	0	0	0	0	0	0	0	0
0,0,-2,0,4,5	0	0	0	0	0	0	0	0	0	0	1	0	0	0	0	0	0	0	0	0	0
0,0,2,0,-7,-10	0	0	0	0	0	0	0	0	0	0	0	0	0	0	0	1	0	0	0	0	0
0,0,-2,0,-7,-6	0	0	0	0	0	0	0	0	0	0	0	0	0	0	0	0	1	0	0	0	0
0,0,2,-1,1,3	0	0	0	0	0	0	0	0	0	0	0	0	0	0	0	0	0	0	0	0	1
0,0,-2,1,-1,-6	0	0	0	0	0	1	0	0	0	0	0	0	0	0	0	0	0	0	0	0	0
0,0,-2,-1,2,-1	0	0	0	1	0	0	0	0	0	0	0	0	0	0	0	0	0	0	0	0	0
0,0,-2,1,-2,-12	0	0	0	1	0	0	0	0	0	0	0	0	0	0	0	0	0	0	0	0	0
0,0,-2,-1,-2,-4	0	0	0	0	0	0	0	1	0	0	0	0	0	0	0	0	0	0	0	0	0
0,0,-2,1,3,1	0	0	0	0	0	0	0	0	0	0	0	0	0	0	0	0	0	1	0	0	0
0,0,2,-1,-3,-15	0	0	0	0	0	0	0	0	0	0	0	0	0	0	0	0	1	0	0	0	0
0,0,2,-1,4,2	0	0	0	0	0	0	0	0	0	0	0	0	0	0	0	0	0	0	1	0	0
0,0,2,-1,-5,-2	0	0	0	0	0	0	0	0	0	0	0	0	0	0	0	0.666667	0	0	0	0	0
0,0,2,-1,-5,-5	0	0	0	0	0	0	0	0	0	0	0	0	0	0	0	0.333333	0	0	0	0	0
0,0,2,-10,4,-6	0	0	0	0	0	0	0	0	0	0	0	0	0	0	0	0	0	0	1	0	0
0,0,2,-12,-15,-10	0	0	0	0	0	0	0	0	0	0	0	0	0	0	0	1	0	0	0	0	0
0,0,-2,-14,-7,-7	0	0	0	0	0	0	0	0	0	0	0	0	0	0	0	0	0	0	1	0	0
0,0,-2,-17,-14,-26	0	0	0	0	0	0	0	0	0	0	0	0	0	0	0	0	0	0	0	0	1
0,0,2,2,0,0	0	0	0	0	0	0	0	0	0	0	0	0	0	0	0	0	0	0	0.5	0	0
0,0,2,-2,0,0	0	0	0	0	0	0	0	0	0	0	0	0	0	0	0	1	0	0	0	0	0
0,0,2,2,0,-12	0	0	0	0	0	0	0	0	0	0	0	0	0	0	0	0	0	0	0.5	0	0
0,0,-2,2,0,-2	0	0	0	0	0	0	0	0	0	0	0	0	0	0	0	0	0	1	0	0	0
0,0,-2,2,0,-3	0	0	0	0	0	0	0	0	0	0	0	0	0	0	0	0	0	0	0	1	0
0,0,-2,-2,0,-5	0	0	0	0	0	0	0	0	0	0	0	0	0	0	0	0	0	0	1	0	0
0,0,2,2,-10,-10	0	0	0	0	0	0	0	0	0	0	0	0	0	0	0	0	1	0	0	0	0
0,0,2,-2,10,7	0	0	0	0	0	0	0	0	1	0	0	0	0	0	0	0	0	0	0	0	0
0,0,2,2,2,2	0	0	0	0	0	0	0	0	0	0	0	0	0	0	0	1	0	0	0	0	0
0,0,-2,-2,-2,-2	0	0	0	0	0	0	0	0	0	0	0	0	0	0	0	0	1	0	0	0	0
0,0,-2,-2,-2,-4	0	0	0	0	0	0	0	0	0	0	0	0	0	0	0	1	0	0	0	0	0
0,0,-2,-2,-3,-1	0	0	0	0	0	0	0	0	0	0	0.5	0	0	0	0	0	0	0	0	0	0
0,0,2,2,3,3	0	1	0	0	0	0	0	0	0	0	0	0	0	1	0	0	0	0	0	0	0
0,0,-2,-2,-3,-3	0	0	0	0	0	0	0	0	0	0	0.5	0	0	0	0	0	0	0	0	0	0
0,0,2,2,3,4	0	0	0	0	0	0	0	0	0	0	0	0	0	0	0	0	0	1	0	0	0
0,0,2,2,4,0	0	0	1	0	0	0	0	0	0	0	0	0	0	0	0	0	0	0	0	0	0
0,0,2,2,4,4	0	0	0	0	0	0	0	0	1	0	0	0	0	0	0	0.5	0	0	0	0	0
0,0,2,2,4,5	0	0	0	0	0	0	0	0	0	0	0	0	0	0	0	0.5	0	0	0	0	0
0,0,2,-2,-5,-10	0	0	1	0	0	0	0	0	0	0	0	0	0	0	0	0	0	0	0	0	0
0,0,2,-2,-5,-3	0	0	0	0	0	0	0	0	0	0	0	0	0	0	0	0	1	0	0	0	0
0,0,-2,-2,-5,-5	0	0	0	0	0	0	0	0	0	0	0	0	0	0	0	1	0	0	0	0	0
0,0,2,2,5,7	0	0	0	0	1	0	0	0	0	0	0	0	0	0	0	1	0	0	0	0	0
0,0,2,-2,5,7	0	0	0	0	0	0	0	0	0	0	0	0	0	0	0	1	0	0	0	0	0
0,0,2,-2,-5,-9	1	0	0	0	0	0	0	0	0	0	0	0	0	0	0	0	0	0	0	0	0
0,0,2,-2,-7,5	0	0	0	0	0	0	0	0	0	0	0	0	0	0	0	0	1	0	0	0	0
0,0,2,2,7,7	0	0	0	0	0	0	0	0	0	0	0	0	0	0	0	1	0	0	0	0	0
0,0,2,2,-7,-7	0	0	0	0	0	0	0	0	1	0	0	0	0	0	0	0	0	0	0	0	0
0,0,-2,-2,-7,-7	0	0	0	0	0	0	0	0	1	0	0	0	0	0	0	0	0	0	0	0	0
0,0,-2,-2,-8,-5	0	0	0	0	0	0	0	0	0	0	0	0	0	0	0	1	0	0	0	0	0
0,0,2,2,9,2	0	0	0	0	0	0	0	1	0	0	0	0	0	0	0	0	0	0	0	0	0
0,0,2,20,24,20	0	0	0	0	0	0	0	0	0	0	0	0	0	0	0	0	0	1	0	0	0
0,0,-2,21,20,17	0	0	0	0	0	0	0	0	0	0	1	0	0	0	0	0	0	0	0	0	0
0,0,-2,-22,-17,-15	0	0	0	0	0	0	0	0	1	0	0	0	0	0	0	0	0	0	0	0	0
0,0,2,3,0,1	0	0	0	0	0	0	0	0	0	0	0	0	0	0	0	1	0	0	0	0	0
0,0,-2,3,0,3	0	0	0	0	0	0	0	0	0	0	0	0	0	0	0	1	0	0	0	0	0
0,0,-2,3,1,3	0	0	0	0	0	0	0	0	0	0	0	0	0	0	0	0	0	0	1	0	0
0,0,-2,-3,-10,-3	0	0	0	0	0	0	0	0	0	0	0	0	0	1	0	0	0	0	0	0	0
0,0,2,3,-16,-14	0	0	0	0	0	0	0	0	0	0	0	0	0	0	0	1	0	0	0	0	0
0,0,2,-3,2,0	0	0	0	0	0	0	0	0	0	0	0	0	0	0	0	0	0	0	1	0	0
0,0,-2,3,2,-2	0	0	0	0	0	0	0	0	0	0	0	0	0	0	0	0	0	1	0	0	0
0,0,-2,-3,2,2	0	0	0	0	0	0	0	0	0	0	0	0	0	0	0	0	1	0	0	0	0
0,0,-2,-3,-3,-5	0	0	0	0	0	0	0	0	0	0	0	1	0	0	0	0	0	0	0	0	0
0,0,-2,-3,-4,-3	0	0	0	1	0	0	0	0	0	0	0	0	0	0	0	0	0	0	0	0	0
0,0,-2,3,4,7	0	0	0	0	0	0	0	0	0	0	0	0	0	0	0	0	1	0	0	0	0
0,0,-2,-3,-5,0	0	0	0	0	0	0	0	0	0	0	0	0	1	0	0	0	0	0	0	0	0
0,0,-2,-3,-5,-3	0	0	0	0	0	0	1	0	0	0	0	0	0	0	0	0	0	0	0	0	0
0,0,2,3,5,5	0	0	0	0	0	0	0	0	0	0	0	0	0	0	0	1	0	0	0	0	0
0,0,2,3,5,7	0	0	1	0	0	0	0	0	0	0	0	0	0	0	0	0	0	0	0	1	0
0,0,-2,-3,-5,-7	0	0	1	0	0	0	0	0	0	0	0	0	0	0	0	0	0	0	0	0	0
0,0,-2,-4,0,0	0	0	0	0	0	0	0	0	0	0	0	1	0	0	0	0	0	0	0	0	0
0,0,2,4,0,2	0	0	0	0	0	0	0	0	1	0	0	0	0	0	0	0	0	0	0	0	0
0,0,-2,-4,0,-2	0	0	0	0	0	0	0	0	0	0	0	0	0	0	0	0	1	0	1	0	0
0,0,-2,-4,-2,-12	0	0	0	0	0	0	0	0	0	0	0	1	0	0	0	0	0	0	0	0	0
0,0,-2,-4,-2,-16	0	0	0	0	0	0	0	0	0	0	0	0	0	0	0	0	0	1	0	0	0
0,0,2,4,-2,-6	0	0	0	0	0	0	0	0	0	0	0	0	0	0	0	1	0	0	0	0	0
0,0,-2,-4,-4,-2	0	0	0	0	0	0	0	0	0	0	0	0	0	0	0	0	1	0	0	0	0
0,0,2,4,5,1	0	0	0	0	1	0	0	0	0	0	0	0	0	0	0	0	0	0	0	0	0
0,0,2,4,5,7	1	0	0	0	0	0	0	0	0	0	0	0	0	0	0	0	0	0	0	0	0
0,0,2,4,6,7	0	0	1	0	0	0	0	0	0	0	0	0	0	0	0	1	0	0	0	0	0
0,0,2,-4,-7,-4	0	0	0	0	0	0	0	0	0	0	0	0	0	0	0	1	0	0	0	0	0
0,0,-2,-4,-7,-4	0	0	0	0	0	0	0	0	1	0	0	0	0	0	0	0	0	0	0	0	0
0,0,-2,-4,-7,-9	0	0	0	0	0	0	0	0	0	0	0	1	0	0	0	0	0	0	0	0	0
0,0,2,4,-8,4	0	0	0	0	0	0	0	0	0	0	0	0	0	0	0	0	0	0	0	0	1
0,0,2,-4,8,7	0	0	0	0	0	0	0	0	0	0	0	0	0	0	0	0	0	1	0	0	0
0,0,2,5,1,5	0	0	0	0	0	0	0	0	0	0	0	0	0	0	0	0	0	1	0	0	0
0,0,-2,5,-2,-1	0	1	0	0	0	0	0	0	0	0	0	0	0	0	0	0	0	0	0	0	0
0,0,2,-5,-22,-17	0	0	0	0	0	0	0	0	1	0	0	0	0	0	0	0	0	0	0	0	0
0,0,2,-5,-3,-5	0	0	0	0	0	0	0	0	1	0	0	0	0	0	0	0	0	0	0	0	0
0,0,-2,-5,-5,-5	0	0	0	0	0	0	0	1	0	0	0	0	0	0	0	1	0	0	0	0	0
0,0,2,5,6,5	0	0	0	0	0	0	0	0	0	0	0	0	0	0	0	1	0	0	0	0	0
0,0,-2,-5,-6,-8	0	0	0	0	0	0	0	0	0	0	0	0	0	0	0	1	0	0	0	0	0
0,0,-2,-5,-7,-10	0	0	0	0	0	0	0	0	0	0	0	0	0	0	0	1	0	0	0	0	0
0,0,-2,-5,-7,2	0	0	0	0	0	0	0	0	0	0	0	0	0.5	0	0	0	0	0	0	0	0
0,0,2,5,7,5	0	0	0	0	0	0	0	0	0	0	0	0	0	0	0	1	0	0	0	0	0
0,0,-2,-5,-7,-5	0	0	0	0	0	0	0	1	0	0	0	0	0.5	0	0	0	0	0	0	0	0
0,0,-2,-5,-8,-12	0	0	0	0	0	0	0	0	0	0	0	0	0	0	0	0	0	0	0	0	1
0,0,-2,-5,-9,-7	0	0	0	0	1	0	0	0	0	0	0	0	0	0	0	0	0	0	0	0	0
0,0,-2,-5,-9,-9	0	0	0	0	0	0	0	0	0	0	1	0	0	0	0	0	0	0	0	0	0
0,0,2,-6,-5,-2	0	0	0	0	1	0	0	0	0	0	0	0	0	0	0	0	0	0	0	0	0
0,0,-2,-7,-11,-3	0	0	1	0	0	0	0	0	0	0	0	0	0	0	0	0	0	0	0	0	0
0,0,-20,-15,-8,-8	0	0	0	0	0	0	0	0	0	0	0	0	0	0	0	0	0	0	1	0	0
0,0,-21,-17,-14,-15	0	0	0	0	0	0	0	0	0	0	0	0	0	0	0	0	0	0	0	0	1
0,0,-27,-24,-22,-24	0	0	0	0	0	0	0	0	0	0	0	0	0	0	0	0	0	0	0	1	0
0,0,3,0,0,2	0	0	0	0	0	0	0	0	0	0	0	0	0	0	0	0.333333	0	0	0	0	0
0,0,3,0,0,-2	0	0	0	0	0	0	0	0	0	0	0	0	0	0	0	0.333333	0	0	0	0	0
0,0,-3,0,0,-2	0	0	0	0	0	0	0	0	0	0	0	0	0	0	0	0	0	0	0	1	0
0,0,3,0,0,3	0	0	0	0	0	0	0	0	0	0	0	0	0	0	0	0.333333	0	0	0	0	0
0,0,-3,0,0,3	0	0	0	0	0	0	0	0.166667	0	0	0	0	0	0	0	0	0	0	0	0	0
0,0,-3,0,0,-3	0	0	0	0	0	0	0	0.833333	0	0	0	0	0	0	0	0	0	0	0	0	1
0,0,3,0,0,7	0	0	0	0	0	0	0	0	0	0	0	1	0	0	0	0	0	0	0	0	0
0,0,-3,0,-1,2	0	0	0	0	0	0	0	0	0	0	0	0	0	0	0	1	0	0	0	0	0
0,0,-3,0,12,19	0	0	0	0	0	0	0	1	0	0	0	0	0	0	0	0	0	0	0	0	0
0,0,3,0,-2,0	0	0	0	0	0	0	0	0	0.5	0	0	0	0	0	0	0	0	0	0	0	0
0,0,3,0,-2,2	0	0	0	0	0	0	0	0	0.5	0	0	0	0	0	0	0	0	0	0	0	0
0,0,-3,0,2,2	0	0	0	0	0	0	0	0	0	0	0	0	0	0	0	1	0	0	0	0	0
0,0,3,0,-2,-5	0	0	0	0	0	0	0	0	0	0	0	0	0	0	0	1	0	0	0	0	0
0,0,3,0,3,0	1	0	0	0	0	0	0	0	0	0	0	0.5	0	0	0	0	0	0	0	0	0
0,0,3,0,3,12	0	0	0	0	0	0	0	0	0	0	0	0.5	0	0	0	0	0	0	0	0	0
0,0,3,0,3,2	0	0	0	0	0	0	0	0	0	0	0	0	0	0	0	0	0	1	0	0	0
0,0,-3,0,-3,-3	0	0	0	0	0	0	0	0	0	0	0	0	0	0	0	0	1	0	0	0	0
0,0,3,0,3,7	0	0	0	0	0	0	0	1	0	0	0	0	0	0	0	0	0	0	0	0	0
0,0,-3,0,-4,-4	0	0	0	0	0	0	0	0	0	0	0	0	0	0	0	0	0	0	0	0	1
0,0,3,0,5,0	0	0	0	0	0	0	0	0	0	0	0	0	0	0	0	0	0	0	1	0	0
0,0,-3,0,7,0	0	0	0	0	0	0	0	0	0	0	0	1	0	0	0	0	0	0	0	0	0
0,0,-3,0,7,9	0	0	0	0	0	0	0	1	0	0	0	0	0	0	0	0	0	0	0	0	0
0,0,3,0,-9,-12	0	0	0	0	0	0	0	0	0	0	0	0	0	0	0	1	0	0	0	0	0
0,0,3,1,0,-2	0	0	0	0	0	0	0	0	0	0	0	0	1	0	0	0	0	0	0	0	0
0,0,3,1,1,5	0	0	0	0	0	0	0	0	0	0	0	0	0	0	0	0	0	0	1	0	1
0,0,3,-1,25,27	0	0	0	0	0	0	0	0	0	0	0	0	0	0	0	0	0	0	0	0	1
0,0,3,1,-6,-4	0	0	0	0	0	0	0	0	0	0	0	0	1	0	0	0	0	0	0	0	0
0,0,-3,-10,-11,-12	0	0	0	0	0	0	0	0	0	0	0	0	0	0	0	0	0	0	0	0	1
0,0,-3,13,23,23	0	0	0	0	0	0	0	0	0	0	0	0	0	0	0	0	1	0	0	0	0
0,0,3,2,0,-2	0	0	0	0	0	0	0	0	0	0	0	0	0	0	0	1	0	0	0	0	0
0,0,-3,2,0,-3	0	0	0	0	0	0	0	0	0	0	0	0	0	0	1	0	0	0	0	0	0
0,0,3,2,-1,-1	0	0	0	0	0	0	0	0	0	0	0	0	0	0	0	0	0	0	0	0	1
0,0,-3,-2,-1,-10	0	0	0	1	0	0	0	0	0	0	0	0	0	0	0	0	0	0	0	0	0
0,0,3,2,-1,-2	0	0	0	0	0	0	0	0	0	0	0	0	0	0	0	1	0	0	0	0	0
0,0,3,2,-11,-11	0	0	0	0	0	0	0	0	0	0	0	0	0	0	0	0	0	0	0	0	1
0,0,-3,-2,-2,-2	0	0	1	0	0	0	0	0	0	0	0	0	0	0	0	0	0	0	0	0	0
0,0,3,2,2,5	0	0	0	0	0	0	0	0	0	0	0	0	0	0	0	0	0	0	0	0	1
0,0,-3,-2,2,6	1	0	0	0	0	0	0	0	0	0	0	0	0	0	0	0	0	0	0	0	0
0,0,-3,-2,-3,0	1	0	0	0	0	0	0	0	0	0	0	0	0	0	0	0	0	0	0	0	0
0,0,3,2,5,15	0	0	0	0	0	0	0	0	0	0	0	0	0	0	0	0	0	1	0	0	0
0,0,3,-2,5,2	0	0	0	0	0	0	0	0	0	0	0	0	0	0	0	0	0	0	1	0	0
0,0,3,-3,0,3	0	0	0	0	0	0	0	0	0	0	0	0	0	0	0	0	1	0	0	0	0
0,0,-3,-3,-15,-6	0	0	0	0	0	0	0	0	0	0	0	0	0	0	0	0	0	0	0	1	0
0,0,-3,-3,2,0	0	0	0	0	0	0	0	0	0	0	0	0	0	0	0	0	1	0	0	0	0
0,0,-3,-3,-2,-3	0	1	0	0	0	0	0	0	0	0	0	0	0	0	0	0	0	0	0	0	0
0,0,-3,3,2,-5	0	0	0	0	0	0	0	0	0	0	0	0	0	0	0	0	0	0	0	1	0
0,0,3,3,3,0	0	0	0	0	0	0	0	0	0	0	0	0	0	0	0	0	1	0	0	0	0
0,0,3,3,3,-3	0	0	0	0	0	0	0	0	0	0	0	0	0	0	0	1	0	0	0	0	0
0,0,-3,-3,-3,-3	0	0	0	0	0	0	0	0	0	0	1	0	0	0	0	0	0	0	0	0	0
0,0,3,3,4,5	0	0	0	0	0	0	0	0	0	0	0	0	0	1	0	0	0	0	0	0	0
0,0,3,3,4,6	0	0	0	0	0	0	0	0	0	0	1	0	0	0	0	0	0	0	0	0	0
0,0,3,-3,5,-2	0	0	0	0	0	0	0	0	0	0	0	0	0	0	0	1	0	0	0	0	0
0,0,-3,-3,-5,-3	0	0	0	0	0	0	0	0	0	0	1	0	0	0	0	0	0	0	0	0	0
0,0,3,3,5,5	0	0	0	0	0	0	0	0	0	0	0	0	0	0	0	1	0	0	0	0	0
0,0,-3,-3,-5,-5	0	0	0	0	0	0	0	0	0	0	0	0	0	0	0	1	0	0	0	0	0
0,0,-3,-3,-5,-7	0	0	0	0	0	0	0	0	1	0	0	0	0	0	0	0	0	0	0	0	0
0,0,3,3,6,6	0	0	0	0	0	0	0	0	0	0	0	0	0	1	0	0	0	0	0	0	0
0,0,-3,-3,-6,-6	0	0	0	1	0	0	0	0	0	0	0	0	0	0	0	0	0	0	0	0	0
0,0,-3,-3,-7,-1	0	0	0	0	0	0	0	0	1	0	0	0	0	0	0	0	0	0	0	0	0
0,0,-3,-3,-7,-7	0	0	0	1	0	0	0	0	0	0	0	0	0	0	0	0	0	0	0	0	0
0,0,-3,-4,-1,2	0	0	0	0	0	0	0	0	0	0	1	0	0	0	0	0	0	0	0	0	0
0,0,-3,4,2,-1	0	0	0	0	0	0	0	0	0	0	0	0	0	0	0	0	0	0	0	0	1
0,0,-3,-4,-3,-1	0	0	0	1	0	0	0	0	0	0	0	0	0	0	0	0	0	0	0	0	0
0,0,-3,-4,-6,-4	0	1	0	0	0	0	0	0	0	0	0	0	0	0	0	0	0	0	0	0	0
0,0,3,4,7,10	0	1	0	0	0	0	0	0	0	0	0	0	0	0	0	0	0	0	0	0	0
0,0,3,4,7,11	0	0	0	0	0	1	0	0	0	0	0	0	0	0	0	0	0	0	0	0	0
0,0,3,5,3,-21	0	0	0	0	0	0	0	0	0	0	0	0	0	0	1	0	0	0	0	0	0
0,0,-3,-5,-3,3	0	0	0	0	0	0	0	1	0	0	0	0	0	0	0	0	0	0	0	0	0
0,0,3,5,3,-4	0	0	0	0	0	0	0	0	0	0	0	0	0	0	0	1	0	0	0	0	0
0,0,-3,-5,-4,4	0	0	0	0	0	0	0	0	0	0	0	0	0	1	0	0	0	0	0	0	0
0,0,3,5,5,3	0	0	0	0	0	0	0	1	0	0	0	0	0	0	0	0	0	0	0	0	0
0,0,3,5,6,7	0	0	0	0	1	0	0	0	0	0	0	0	0	0	0	0	0	0	0	0	0
0,0,-3,-5,-6,-9	0	0	0	0	0	0	0	0	0	0	0	0	0	0	0	0	0	0	0	1	0
0,0,3,5,7,-17	0	0	0	0	0	0	0	0	0	0	0	0	0	0	0.5	0	0	0	0	0	0
0,0,3,5,7,2	0	0	0	0	0	0	0	0	0	0	0	0	0	0	0.5	0	0	0	0	0	0
0,0,-3,-5,-7,-3	0	0	0	0	0	0	0	0	0	0	0	0	0	0	0	1	0	0	0	0	0
0,0,-3,-5,-8,-8	0	0	0	0	0	0	0	0	0	0	0	0	0	0	0	1	0	0	0	0	0
0,0,-3,-6,-10,0	0	0	0	0	0	0	0	0	0	0	0	0	0	0.5	0	0	0	0	0	0	0
0,0,-3,-6,-10,-10	0	0	0	0	0	0	0	0	0	0	0	0	0	0.5	0	0	0	0	0	0	0
0,0,3,6,10,8	0	0	0	0	0	0	0	0	0	0	0	1	0	0	0	0	0	0	0	0	0
0,0,-3,6,2,0	0	0	0	0	0	0	0	0	0	0	0	0	0	0	0	0	0	0	0	0	1
0,0,-3,-6,-3,-6	0	0	0	0	0	0	0	0	0	0	0	1	0	0	0	0	0	0	0	0	0
0,0,-3,-6,-8,4	0	0	0	0	0	0	0	0	0	0	0	0	0	1	0	0	0	0	0	0	0
0,0,-3,-6,-8,-9	0	0	1	0	0	0	0	0	0	0	0	0	0	0	0	0	0	0	0	0	0
0,0,3,7,0,3	0	1	0	0	0	0	0	0	0	0	0	0	0	0	0	0	0	0	0	0	0
0,0,3,7,10,2	0	0	0	0	0	0	0	0	0	0	0	0	0	1	0	0	0	0	0	0	0
0,0,-3,-7,-10,-3	0	0	0	0	0.5	0	0	0	0	0	0	0	0	0	0	0	0	0	0	0	0
0,0,3,7,10,7	1	0	0	0	0	0	0	0	0	0	0	0	0	0	0	0	0	0	0	0	0
0,0,-3,-7,-10,-7	0	0	0	0	0.5	0	0	0	0	0	0	0	0	0	0	0	0	0	0	0	0
0,0,3,7,5,3	0	1	0	0	0	0	0	0	0	0	0	0	0	0	0	0	0	0	0	0	0
0,0,-3,-7,-8,2	0	0	0	0	0	0	0	0	0	0	0	0	0	0	1	0	0	0	0	0	0
0,0,-3,-8,-10,-10	0	0	1	0	0	0	0	0	0	0	0	0	0	0	0	0	0	0	0	0	0
0,0,-3,-8,-12,-3	0	0	0	0	0	0	0	0	0	0	0	0	0	0	0	0	0	0	0	1	0
0,0,3,8,12,4	0	0	0	0	0	0	0	0	0	0	0	0	0	1	0	0	0	0	0	0	0
0,0,-3,-8,-12,-4	0	0	1	0	0	0	0	0	0	0	0	0	0	0	0	0	0	0	0	0	0
0,0,-3,-8,-3,-3	0	0	0	0	0	0	0	1	0	0	0	0	0	0	0	0	0	0	0	0	0
0,0,-3,-8,-4,-3	0	0	1	0	0	0	0	0	0	0	0	0	0	0	0	0	0	0	0	0	0
0,0,3,-9,-12,-7	0	0	0	0	0	0	0	0	0	0	0	0	0	0	0	1	0	0	0	0	0
0,0,4,0,0,16	0	0	0	0	0	0	0	0	1	0	0	0	0	0	0	0	0	0	0	0	0
0,0,4,0,-1,4	0	0	0	0	0	0	0	0	0	0	0	0	0	0	0	0	0	0	0	0	1
0,0,4,0,-2,0	0	0	0	0	0	0	0	0	0	0	0	0	0	0	1	0	0	0	0	0	0
0,0,-4,0,-2,0	0	0	0	0	0	0	0	1	0	0	0	0	0	0	0	0	0	0	0	0	0
0,0,-4,0,3,0	0	1	0	0	0	0	0	1	0	0	0	0	0	0	0	0	0	0	0	0	0
0,0,4,0,-3,2	0	0	1	0	0	0	0	0	0	0	0	0	0	0	0	0	0	0	0	0	0
0,0,-4,0,4,8	0	0	0	0	0	0	0	0.333333	0	0	0	0	0	0	0	0	0	0	0	0	0
0,0,-4,0,4,9	0	0	0	0	0	0	0	0.666667	0	0	0	0	0	0	0	0	0	0	0	0	0
0,0,-4,0,7,0	0	0	0	0	0.5	0	0	0	0	0	0	0	0	0	0	0	0	0	0	0	0
0,0,-4,0,7,4	0	0	0	0	0.5	0	0	0	0	0	0	0	0	0	0	0	0	0	0	0	0
0,0,-4,-1,0,3	0	0	0	1	0	0	0	0	0	0	0	0	0	0	0	0	0	0	0	0	0
0,0,4,1,1,4	0	0	0	0	0	0	0	0	0	0	0	0	0	0	0	0	0	0	1	0	0
0,0,-4,-16,4,7	0	0	0	0	0	0	0	0	0	1	0	0	0	0	0	0	0	0	0	0	0
0,0,-4,-2,0,-2	0	0	0	0	0	0	0	1	0	0	0	0	0	0	0	0	0	0	0	0	0
0,0,4,2,0,4	0	0	0	0	0	0	0	0	0	0	0	0	0	0	0	0	0	0	0	0	1
0,0,-4,2,-1,0	1	0	0	0	0	0	0	0	0	0	0	0	0	0	0	0	0	0	0	0	0
0,0,-4,-2,-1,1	0	1	0	0	0	0	0	0	0	0	0	0	0	0	0	0	0	0	0	0	0
0,0,4,2,2,5	0	0	0	0	0	0	0	0	0	0	0	0	0	0	0	0	0	0	0	0	0.5
0,0,-4,2,2,5	0	0	0	0	0	0	0	0	0	0	0	0	0	0	0	1	0	0	0	0	0
0,0,4,2,2,6	0	0	0	0	0	0	0	0	0	0	0	0	0	0	0	0	0	0	0	0	0.5
0,0,-4,2,3,13	0	0	0	0	0	0	0	0	1	0	0	0	0	0	0	0	0	0	0	0	0
0,0,4,2,3,6	0	0	0	0	0	0	0	0	0	0	0	0	0	0	0	0	0	0	1	0	0
0,0,4,2,4,5	0	0	0	0	0	0	0	0	0	0	0	0	0	0	0	0	0	0	0	0	1
0,0,-4,2,7,11	0	0	0	0	0	0	0	0	0	0	0	0	0	1	0	0	0	0	0	0	0
0,0,-4,-3,0,-2	0	0	0	1	0	0	0	0	0	0	0	0	0	0	0	0	0	0	0	0	0
0,0,-4,-3,-1,0	0	1	0	0	0	0	0	0	0	0	0	0	0	0	0	0	0	0	0	0	0
0,0,-4,-3,14,14	0	0	0	0	0	0	0	0	0	0	0	0	0	0	0	0	0	0	0	0	1
0,0,-4,3,3,6	0	0	0	0	0	0	0	0	0	0	0	0	0	0	0	0	0	1	0	0	0
0,0,-4,-3,-4,-6	0	0	0	0	0	0	0	0	0	1	0	0	0	0	0	0	0	0	0	0	0
0,0,-4,-3,-4,-9	0	1	0	0	0	0	0	0	0	0	0	0	0	0	0	0	0	0	0	0	0
0,0,4,-4,-1,4	0	0	0	0	0	0	0	0	0	0	0	0	0	0	0	0	1	0	0	0	0
0,0,4,4,5,5	0	0	0	0	0	0	0	0	0	0	0	0	0	0	0	0	0	1	0	0	0
0,0,-4,-4,-6,-5	0	0	0	1	0	0	0	0	0	0	0	0	0	0	0	0	0	0	0	0	0
0,0,-4,-4,-8,-2	0.5	0	0	0	0	0	0	0	0	0	0	0	0	0	0	0	0	0	0	0	0
0,0,-4,-4,-8,-5	0	0	0	0.5	0	0	0	0	0	0	0	0	0	0	0	0	0	0	0	0	0
0,0,-4,-4,-8,-8	0.5	0	0	0.5	0	0	0	0	0	0	0	0	0	0	0	0	0	0	0	0	0
0,0,4,4,9,4	0	0	0	0	0	0	0	1	0	0	0	0	0	0	0	0	0	0	0	0	0
0,0,-4,-5,0,0	1	0	0	0	0	0	0	0	0	0	0	0	0	0	0	0	0	0	0	0	0
0,0,-4,5,3,0	0	0	0	0	0	0	0	0	0	0	0	0	0	0	0	0	0	0	0	0	1
0,0,-4,-7,0,0	0	0	0	0	1	0	0	0	0	0	0	0	0	0	0	0	0	0	0	0	0
0,0,-4,-7,0,-4	0	0	0	0	0	0	0	0	0	0	0	0	0	0	0	0	0	1	0	0	0
0,0,-4,-7,1,-3	0	0	0	0	0	0	0	0	0	0	0	0	0	0	0	0	1	0	0	0	0
0,0,-4,-7,-11,-7	0	0	0	0	0	0	0	0	0	0	0	0	1	0	0	0	0	0	0	0	0
0,0,4,7,12,13	0	0	0	0	0	0	0	0	0	0	0	0	0	1	0	0	0	0	0	0	0
0,0,-4,-7,-2,0	0	0	0	0	0	0	0	0	0	0	1	0	0	0	0	0	0	0	0	0	0
0,0,-4,-7,3,5	0	0	0	0	1	0	0	0	0	0	0	0	0	0	0	0	0	0	0	0	0
0,0,-4,-7,-4,-2	0	0	1	0	0	0	0	0	0	0	0	0	0	0	0	0	0	0	0	0	0
0,0,4,7,4,5	1	0	0	0	0	0	0	0	0	0	0	0	0	0	0	0	0	0	0	0	0
0,0,4,7,5,9	1	0	0	0	0	0	0	0	0	0	0	0	0	0	0	0	0	0	0	0	0
0,0,-4,-7,-7,-5	0	0	0	0	0	0	0	0	0	0	0	0	0	0	0	0	0	1	0	0	0
0,0,-4,-7,-7,-7	0	1	0	0	0	0	0	0	0	0	0	0	0	0	0	0	0	0	0	0	0
0,0,4,9,0,0	0	0	0	0	0	0	0	0	0	0	0	0	0	0	0	1	0	0	0	0	0
0,0,4,9,9,9	0	0	0	0	0	0	0	0	0	0	0	0	0	0	0	0	0	0	0	0	1
0,0,-5,0,0,0	0	0	0	0	0	0	0	0	0	0	0	0	0	0	0	0	0	0	1	0	0
0,0,-5,0,-1,-6	0	0	0	0	0	0	0	0	1	0	0	0	0	0	0	0	0	0	0	0	0
0,0,5,0,5,5	0	0	0	0	0	0	0	0.5	0	0	0	0	0	0	0	0	0	0	0	0	0
0,0,5,0,5,8	0	0	0	0	0	0	0	0.5	0	0	0	0	0	0	0	0	0	0	0	0	0
0,0,5,10,12,13	0	0	0	0	0	0	0	0	0	0	1	0	0	0	0	0	0	0	0	0	0
0,0,-5,-12,-6,-5	0	0	1	0	0	0	0	0	0	0	0	0	0	0	0	0	0	0	0	0	0
0,0,5,12,8,-2	0	0	0	0	0	0	0	0	1	0	0	0	0	0	0	0	0	0	0	0	0
0,0,5,2,5,2	0	0	0	0	0	0	0	0	0	0	0	1	0	0	0	0	0	0	0	0	0
0,0,5,2,7,3	0	0	0	0	0	0	0	0	0	0	0	0	0	0	0	0	0	0	0	1	0
0,0,-5,-3,0,0	0	0	0	0	0	0	0	0	0	0	1	0	0	0	0	0	0	0	0	0	0
0,0,5,3,2,3	0	0	0	0	0	0	0	0	0	0	0	0	0	0	0	0	1	0	0	0	0
0,0,5,3,3,3	0	0	0	0	0	0	0	0	0	0	0	1	0	0	0	0	0	0	0	0	0
0,0,5,3,-4,-2	0	0	0	0	0	0	0	0	0	0	0	0	1	0	0	0	0	0	0	0	0
0,0,5,4,0,0	0	0	0	0	0	0	0	0	0	0	0	0	0	0	0	0	0	0	0	0	0.5
0,0,5,4,0,2	0	0	0	0	0	0	0	0	0	0	0	0	0	0	0	0	0	0	0	0	0.5
0,0,-5,-4,-3,0	0	0	0	0	0	0	0	0	0	0	1	0	0	0	0	0	0	0	0	0	0
0,0,5,4,6,9	0	0	0	0	0	0	0	0	0	0	0	0	0	0	0	0	1	0	0	0	0
0,0,5,4,8,7	0	0	0	0	0	0	0	0	0	0	0	0	0	0	0	0	0	0	0	0	1
0,0,5,5,-1,5	0	0	0	0	0	0	0	0	0	0	0	0	0	0	0	0	1	0	0	0	0
0,0,5,5,1,7	0	0	0	0	0	0	0	0	0	0	0	0	0	0	0	1	0	0	0	0	0
0,0,-5,-5,-10,-12	0	0	0	0	0	0	0	0	1	0	0	0	0	0	0	0	0	0	0	0	0
0,0,5,5,-5,5	0	0	0	0	0	0	0	0	0	0	0	0	0	0	0	1	0	0	0	0	0
0,0,5,5,8,8	0	0	0	0	0	0	0	0	0	0	0	0	0	0	0	1	0	0	0	0	0
0,0,5,5,8,9	0	0	0	0	0	1	0	0	0	0	0	0	0	0	0	0	0	0	0	0	0
0,0,-5,-6,0,-5	1	0	0	0	0	0	0	0	0	0	0	0	0	0	0	0	0	0	0	0	0
0,0,5,6,9,11	0	0	0	0	0	0	0	0	0	0	0	0	0	1	0	0	0	0	0	0	0
0,0,-5,-7,-10,0	0	0	0	0	0	0	0	1	0	0	0	0	0	0	0	0	0	0	0	0	0
0,0,-5,-7,-12,-5	0	0	1	0	0	0	0	0	0	0	0	0	0	0	0	0	0	0	0	0	0
0,0,-5,-7,-2,0	0	0	0	0	0	0	0	0	1	0	0	0	0	0	0	0	0	0	0	0	0
0,0,5,7,7,8	0	0	0	0	0	0	0	0	0	0	0	0	0	0	0	0	0	0	0	0	1
0,0,-5,-8,0,0	0	0	0	0	1	0	0	0	0	0	0	0	0	0	0	0	0	0	0	0	0
0,0,-5,-9,-12,-5	0	0	0	0	0	0	0	0	1	0	0	0	0	0	0	0	0	0	0	0	0
0,0,-5,-9,-12,-6	0	0	1	0	0	0	0	0	0	0	0	0	0	0	0	0	0	0	0	0	0
0,0,5,9,7,5	0	0	0	0	0	0	0	0	0	0	0	0	0	1	0	0	0	0	0	0	0
0,0,-6,0,0,0	0	0	0	0	0	0	0	0	0	0	0	0	0	0	0	0	1	0	0	0	0
0,0,-6,0,-7,0	0	0	0	0	0	0	0	0	0	0	0	0	0	1	0	0	0	0	0	0	0
0,0,-6,-1,-26,-25	0	0	0	0	0	0	0	0	0	0	1	0	0	0	0	0	0	0	0	0	0
0,0,-6,-2,0,3	0	0	0	0	0	0	0	0	0	0	0	0	0	0	0	0	1	0	0	0	0
0,0,-6,-2,-4,-4	0	0	0	0	0	0	0	0	0	0	0	0	0	0	0	0	0	0	0	0	1
0,0,-6,-3,-6,-8	0	0	0	0	0	0	0	0	0	0	0	0	0	0	0	1	0	0	0	0	0
0,0,6,4,0,6	0	0	0	0	0	0	0	0	0	0	0	0	0	0	0	0	0	0	0	0	1
0,0,6,4,1,6	0	0	0	0	0	0	0	0	0	0	0	0	0	0	0	0	0	0	0	0	1
0,0,-6,-4,-2,0	0	1	0	0	0	0	0	0	0	0	0	0	0	0	0	0	0	0	0	0	0
0,0,-6,4,4,-3	0	0	0	0	0	0	0	0	0	0	0	0	0	0	0	0	0	0	0	0	1
0,0,-6,-6,-3,-4	0	0	0	0	0	0	0	0	0	0	0	0	0	0	0	1	0	0	0	0	0
0,0,-6,-9,-12,-3	0	0	0	0	1	0	0	0	0	0	0	0	0	0	0	0	0	0	0	0	0
0,0,-7,0,-7,-5	0	0	0	0	0	0	0	0	0	0	0	1	0	0	0	0	0	0	0	0	0
0,0,-7,0,-7,-7	0	0	0	0	0	0	0	0	0	0	0	0	0	0	0	0	1	0	0	0	0
0,0,7,0,9,0	0	0	0	0	0	0	0	1	0	0	0	0	0	0	0	0	0	0	0	0	0
0,0,-7,-10,0,2	0	0	0	0	0	0	0	0	0	0	0	0	0	0	0	0	0	0	0	1	0
0,0,-7,-10,-10,-10	0	0	0	0	0	0	0	0	0	0	0	1	0	0	0	0	0	0	0	0	0
0,0,-7,-21,-19,-14	0	0	0	0	0	0	0	0	0	0	0	0	0	0	0	0	0	1	0	0	0
0,0,7,3,-1,-1	0	1	0	0	0	0	0	0	0	0	0	0	0	0	0	0	0	0	0	0	0
0,0,-7,-31,-28,-29	0	0	0	0	0	0	0	0	0	0	0	0	0	0	0	0	0	0	0	0	1
0,0,-7,-4,0,1	0	0	0	0	0	0	0	0	0	0	0	0	1	0	0	0	0	0	0	0	0
0,0,-7,-4,5,-4	0	0	0	0	0	0	0	1	0	0	0	0	0	0	0	0	0	0	0	0	0
0,0,7,5,0,1	0	0	0	0	0	0	0	0	0	0	0	0	0.5	0	0	0	0	0	0	0	0
0,0,7,5,0,-4	0	0	0	0	0	0	0	0	0	0	0	0	0.5	0	0	0	0	0	0	0	0
0,0,7,5,3,5	0	0	0	0	0	0	0	0	0	0	0	0	0	0	0	0	0	1	0	0	0
0,0,7,5,-7,4	0	0	0	0	0	0	0	0	0	1	0	0	0	0	0	0	0	0	0	0	0
0,0,-7,-7,0,0	0	0	0	0	0	0	0	0	1	0	0	0	0	0	0	0	0	0	0	0	0
0,0,7,7,14,14	0	0	0	0	0	0	0	0	1	0	0	0	0	0	0	0	0	0	0	0	0
0,0,7,7,5,-15	0	0	0	0	0	0	0	0	1	0	0	0	0	0	0	0	0	0	0	0	0
0,0,7,7,7,7	0	0	0	0	0	0	0	0	0	0	0	0	0	0	0	1	1	0	0	0	0
0,0,7,9,3,0	0	0	0	0	0	0	0	0	0	0	0	1	0	0	0	0	0	0	0	0	0
0,0,-7,-9,-7,-5	0	0	0	0	0	0	0	0	0	0	0	0	0	0	1	0	0	0	0	0	0
0,0,-8,-1,-1,-8	0	0	0	0	0	0	0	0	1	0	0	0	0	0	0	0	0	0	0	0	0
0,0,-8,2,0,-8	0	0	0	0	0	0	0	0	0	0	0	0	0	0	1	0	0	0	0	0	0
0,0,8,4,1,1	0	1	0	0	0	0	0	0	0	0	0	0	0	0	0	0	0	0	0	0	0
0,0,-8,-6,-4,-3	0	0	0	1	0	0	0	0	0	0	0	0	0	0	0	0	0	0	0	0	0
0,0,-8,-7,-6,-3	0	0	0	0	0	0	0	0	0	0	1	0	0	0	0	0	0	0	0	0	0
0,0,8,8,4,1	0	1	0	0	0	0	0	0	0	0	0	0	0	0	0	0	0	0	0	0	0
0,0,8,9,8,6	0	0	0	0	0	0	0	1	0	0	0	0	0	0	0	0	0	0	0	0	0
0,0,9,0,0,3	0	0	0	0	0	0	0	0	0	0	0	1	0	0	0	0	0	0	0	0	0
0,0,-9,0,0,-6	0	0	0	0	0	0	0	0	0	0	0	0	0	0	0	0	0	0	0	0	1
0,0,9,5,9,5	0	0	0	0	0	0	0	0	0	0	0	0	1	0	0	0	0	0	0	0	0
0,0,-9,-6,-2,5	0	0	0	0	0	0	0	0	0	0	0	0	0	1	0	0	0	0	0	0	0
0,0,-9,-6,-4,-7	0	0	0	0	0	0	0	0	0	0	0	0	0	0	0	0	1	0	0	0	0
0,0,-9,-7,-6,-4	0	0	0	1	0	0	0	0	0	0	0	0	0	0	0	0	0	0	0	0	0
0,0,9,7,7,10	0	0	0	0	0	0	0	0	0	0	0	0	0	0	0	0	0	1	0	0	0
0,0,-9,-7,-9,-9	0	0	0	0	0	0	0	1	0	0	0	0	0	0	0	0	0	0	0	0	0
0,0,-9,-9,-12,-12	0	0	0	0	0	0	0	0	1	0	0	0	0	0	0	0	0	0	0	0	0
0,-1,0,0,0,1	0	0	0	0	0	0	0	0	0	0	0	0	0	0	0	0	0	0	0	0	0.5
0,-1,0,0,0,-9	0	0	0	0	0	0	0	0	0	0	0	0	0	0	0	0	0	0	0	0	0.5
0,1,0,0,1,0	0	0	0	0	0	0	0	0	0	0	0.75	0	1	0	0	0	0	0	0	0	0
0,1,0,0,1,2	0	0	0	0	0	0	0	0	0	0	0.25	0	0	0	0	0	0	0	0	0	0
0,1,0,0,1,4	0	1	0	0	0	0	0	0	0	0	0	0	0	0	0	0	0	0	0	0	0
0,1,0,0,-2,0	0	0	0	0	0	0	0	0	1	0	1	0	0	0	0	0	0	0	0	0	0
0,1,0,0,2,-2	0	0	0	0	0	0	0	0	1	0	0	0	0	0	0	0	0	0	0	0	0
0,1,0,0,2,4	0	0	0	0	0	0	0	0	0	0	0	0	0	0	0	0	0	0	0	0	1
0,1,0,0,-21,-17	0	0	0	0	0	0	0	0	0	0	0	0	0	0	0	0	0	0	0	0	1
0,1,0,0,-3,-3	0	1	0	0	0	0	0	0	0	0	0	0	0	0	0	0	0	0	0	0	0
0,1,0,0,-4,-3	0	1	0	0	0	0	0	0	0	0	0	0	0	0	0	0	0	0	0	0	0
0,-1,0,0,4,7	1	0	0	0	0	0	0	0	0	0	0	0	0	0	0	0	0	0	0	0	0
0,1,0,1,0,1	0	0.5	0	0	0	0	0	0	0	0	0	0	0	0	1	0	0	0	0	0	0
0,1,0,1,0,-1	0	0	0	0	0	0	0	0	1	0	0	0	0	0	0	0	0	0	0	0	0
0,1,0,-1,0,1	0	0	0	0	0	0	0	0	0	0	0	0	0	1	0	0	0	0	0	0	0
0,1,0,-1,0,-1	0	0	0	0	0	0	0	0	0	0	1	0	0	0	0	0	0	0	0	0	0
0,-1,0,1,0,1	0	0	0	0	0	0	0	0	0	0	0	0	0	1	0	0	0	0	0	0	0
0,-1,0,-1,0,-1	0	0.5	0	0	0	0	0	0	0	0	0	0	0	0	0.666667	0	0	0	0	0	0
0,1,0,1,0,-2	1	0	0	0	0	0	0	0	0	0	0	0	0	0	0	0	0	0	0	0	0
0,-1,0,-1,0,2	0	0.5	0	0	0	0	0	0	0	0	0	0	0	0	0.333333	0	0	0	0	0	0
0,1,0,1,0,3	0	0	0	0	0	0	0	0	0	0	1	0	0	0	0	0	0	0	0	0	0
0,-1,0,1,0,3	0	0	0	0	0	0	0	0	0	0	0	0	0	0	0	0	0	0	0	0	1
0,-1,0,-1,0,3	0	0	0	0	0	0	0	0	0	0	0	0	0	0	0	0	1	0	0	0	0
0,1,0,1,0,-4	0	0.5	0	0	0	0	0	0	0	0	0	0	0	0	0	0	0	0	0	0	0
0,-1,0,1,1,0	0	0	0	0	0	0	0	0	0	0	0	0	0	0.8	0	0	0	0	0	0	0
0,-1,0,-1,-1,0	0	1	0	0	0	0	0	0	0	0	1	0	0	0	0	0	0	0	0	0	0
0,1,0,-1,-1,-1	0	0	0	0	0	0	0	0	1	0	0	0	0	0	0	0	0	0	0	0	0
0,-1,0,1,1,-1	0	0	0	0	0	0	0	0	0	0	0	0	0	0.2	0	0	0	0	0	0	0
0,-1,0,-1,-1,1	0	0	0	0	0	0	0	0	0.5	0	0	0	0	0	0	0	0	0	0	0	0
0,-1,0,-1,-1,-3	0	0	0	0	0	0	0	0	0.5	0	0	0	0	0	0	0	0	0	0	0	0
0,-1,0,1,2,0	0	0	0	0	0	0	0	0	0	0	0.333333	0	0	0	0	0	0	0	0	0	0
0,1,0,-1,-2,-1	0	0	0	0	0	0	0	0	0	0	0.444444	0	0	0	0	0	0	0	0	0	0
0,-1,0,1,2,1	0	0	0	0	0	0	0	0	0	0	0.666667	0	0	0	0	0	0	0	0	0	0
0,-1,0,-1,2,-1	0	0	0	0	0	0	0	0	0	0	1	0	0	0	0	0	0	0	0	0	0
0,-1,0,-1,-2,-1	0	0	0	0	0	0	0	0	0	0	0.923077	0	0	1	0	0	0	0	0	0	0
0,1,0,-1,-2,10	0	0	0	0	0	0	0	0	0	0	0.111111	0	0	0	0	0	0	0	0	0	0
0,1,0,1,2,2	0	0	0	0	0	0	0	0	0	0	0	0	0	1	0	0	0	0	0	0	0
0,1,0,-1,-2,-2	1	0	0	0	0	0	0	0	0	0	0.111111	0	0	0	0	0	0	0	0	0	0
0,-1,0,-1,-2,-2	0	0	0	0	0	0	0	0	0.5	0	0	0	0	0	0	0	0	0	0	0	0
0,1,0,-1,-2,-3	0	1	0	1	0	1	0.5	0	0	0	0.333333	0	0	0	0	0	0	0	0	0	0
0,-1,0,1,2,3	0	0	0	0	0	0	0	0	0	0	0	0	0	1	0	0	0	0	0	0	0
0,-1,0,-1,-2,-3	0	0	0	0	0	0	0	0	0	0	0.0769231	0	0	0	0	0	0	0	0	0	0
0,-1,0,-1,-2,4	0	0	0	0	0	0	0	0	0.5	0	0	0	0	0	0	0	0	0	0	0	0
0,1,0,1,-2,-5	0	0	1	0	0	0	0	0	0	0	0	0	0	0	0	0	0	0	0	0	0
0,1,0,-1,-2,-5	0	0	0	0	0	0	0.25	0	0	0	0	0	0	0	0	0	0	0	0	0	0
0,1,0,1,-2,6	0.5	0	0	0	0	0	0	0	0	0	0	0	0	0	0	0	0	0	0	0	0
0,1,0,1,-2,-6	0.5	0	0	0	0	0	0	0	0	0	0	0	0	0	0	0	0	0	0	0	0
0,1,0,-1,-2,-6	0	0	0	0	0	0	0.25	0	0	0	0	0	0	0	0	0	0	0	0	0	0
0,-1,0,-1,-3,0	0	0	0	1	0	0	0	0	0	0	0	0	0	0	0	0	0	0	0	0	0
0,1,0,1,3,1	0	0	0	0	0	0	0	0	0	0	0	0	0	0	0	0.666667	0	0	0	1	1
0,-1,0,1,3,1	0	0	0	1	0	0	0	0	0	0	0	0	0	0	0	0	0	0	0	0	0
0,-1,0,-1,-3,-1	0	0	0	0	0	0	0	0	0	0	0	0	0	0	0	0	0	0	0	0	1
0,-1,0,-1,-3,-3	0	1	0	0	0	0	0	0	0	0	0	0	0	0	0	0	0	0	0	0	0
0,1,0,1,3,4	0	1	0	0	0	1	0	0	0	0	0	0	0	0	0	0	0	0	0	0	0
0,1,0,-1,-3,-4	1	0	0	0	0	0.5	0	0	0	0	0	0	0	0	0	0	0	0	0	0	0
0,-1,0,-1,-3,-4	1	0	0	0	0	0	0.2	0	0	0	0	0	0	0	0	0	0	0	0	0	0
0,1,0,1,3,5	0	0	0	0	0	0	0	0	0	0	0	0	0	0	1	0	0	0	0	0	0
0,-1,0,-1,-3,-5	0	0	0	0	0	0	0.6	0	0	0	0	0	0	0	0	0	0	0	0	0	0
0,1,0,1,3,6	0	0	0	0	0	0	0	0	0	0	0	0	0	1	0	0.333333	0	0	0	0	0
0,1,0,-1,-3,-6	0	0	0	0	0	0.5	0	0	0	0	0	0	0	0	0	0	0	0	0	0	0
0,-1,0,-1,-3,-6	0	0	0	0	0	0	0.2	0	0	0	0	0	0	0	0	0	0	0	0	0	0
0,-1,0,-1,-4,-1	0	0	0	0	0	0	0	0	0	0	1	0	0	0	0	0	0	0	0	0	0
0,-1,0,-1,-4,-3	0	1	0	0	0	0	1	0	0	0	0	0	0	0	0	0	0	0	0	0	0
0,1,0,1,4,4	0	0	0	0	0	0	0	0	0	0	0	0	0	0	0	0	1	0	0	0	0
0,1,0,1,4,7	0	0	0	0	0	1	0	0	0	0	0	0	0	0	0	0	0	0	0	0	0
0,-1,0,1,4,7	0	1	0	0	0	0	0	0	0	0	0	0	0	0	0	0	0	0	0	0	0
0,-1,0,-1,-5,-10	0	0	0	0	0	0	0	0	0	0	0	0	1	0	0	0	0	0	0	0	0
0,1,0,-1,5,6	0	0	0	0	0	0	0	0	1	0	0	0	0	0	0	0	0	0	0	0	0
0,-1,0,-1,-5,-8	0	1	0	0	0	0	0	0	0	0	0	0	0	0	0	0	0	0	0	0	0
0,-1,0,-1,-6,-12	1	0	0	0	0	0	0	0	0	0	0	0	0	0	0	0	0	0	0	0	0
0,-1,0,-1,8,10	0	0	0	0	0	0	0	0	0	0	0	0	0	0	0	0	1	0	0	0	0
0,-1,0,10,10,8	0	0	0	0	0	0	0	0	0	0	1	0	0	0	0	0	0	0	0	0	0
0,-1,0,11,12,13	1	0	0	0	0	0	0	0	0	0	0	0	0	0	0	0	0	0	0	0	0
0,-1,0,-12,1,0	1	0	0	0	0	0	0	0	0	0	0	0	0	0	0	0	0	0	0	0	0
0,-1,0,12,10,7	0	0	0	0	1	0	0	0	0	0	0	0	0	0	0	0	0	0	0	0	0
0,1,0,-2,0,0	0	0	0	0	0	0	0	0	0	0	1	0	0	0	0	0	0	0	0	0	0
0,1,0,-2,0,-2	0	1	0	0	0	0	1	0	1	0	0	0	0	0	0	0	0	0	0	0	1
0,-1,0,2,0,2	0	0	0	0	0	0	0	0	0	0	0	0	0	0	0	0.333333	0	0	0	1	1
0,-1,0,2,0,4	0	0	0	0	0	0	0	0	0	0	0	0	0	0	0	0.333333	0	0	0	0	0
0,-1,0,2,0,-4	0	0	0	0	0	0	0	0	0	0	0	0	0	0	0	0.333333	0	0	0	0	0
0,1,0,2,-1,0	1	0	0	0	0	0	0	0	0	0	0	0	0	0	0	0	0	0	0	0	0
0,1,0,-2,1,0	0	0	0	0	0	0	0	0	0	0	1	0	0	0	0	0	0	0	0	0	0
0,-1,0,2,-1,0	0	0	0	0	0	0	0	0	0	0	0	0	0	1	0	0	0	0	0	0	0
0,1,0,2,-1,1	0	0	0	0	0	0	0	0	0	0	0	0	0	0	0	0	0	0	0	1	0
0,1,0,2,1,2	1	0	0	0	0	0	0	0	0	0	0	0	0	0	0	0	0	0	0	0	0
0,1,0,-2,1,-3	0	0	0	1	0	0	0	0	0	0	0	0	0	0	0	0	0	0	0	0	0
0,-1,0,2,1,4	0	0	0	0	0	0	0	0	0	0	0	0	0	0	0	0	0	0	0	0	1
0,1,0,-2,-2,0	0	1	0	0	0	0	0	0	0	0	0	0	0	0	0	0	0	0	0	0	0
0,-1,0,2,3,1	0	0	0	0	0	0.25	0	0	0	0	0	0	0	0	0	0	0	0	0	0	0
0,1,0,-2,-3,-2	0.333333	0	0	0	0	0	0	0	0	0	0	0	0	0	0	0	0	0	0	0	0
0,-1,0,2,3,2	0	0	0	0	0	0.75	0	0	0	0	0	0	0	0	0	0	0	0	0	0	0
0,1,0,-2,-3,-4	0.333333	0	0	0	0	0	0	0	0	0	0	0	1	0	0	0	0	0	0	0	0
0,-1,0,2,3,4	0.5	0	0	0.666667	0	0	0	0	0	0	0	0	0	0	0	0	0	0	0	1	0
0,1,0,-2,-3,-5	0.333333	0	0	0	0	1	0.5	0	0	0	0	0	0	0	0	0	0	0	0	0	0
0,-1,0,2,3,5	0.5	1	0	0.333333	0	0	1	0	0	0	0	0	0	0	0	0	0	1	0	0	0
0,1,0,-2,-3,-8	0	0	0	0	0	0	0.5	0	0	0	0	0	0	0	0	0	0	0	0	0	0
0,1,0,-2,-4,-1	0	0	0	0	0	0	0	0	1	0	0	0	0	0	0	0	0	0	0	0	0
0,-1,0,2,4,11	0	0	0	0	0	0	0	0	0.5	0	0	0	0	0	0	0	0	0	0	0	0
0,1,0,-2,-4,-2	0	1	0	0	0	0	0.666667	0	0	0	0	0	0	0	0	0	0	0	0	0	0
0,-1,0,2,4,2	0	0	0	0	0	0	0	0	0	0	0	0	0	0	1	0	0	0	0	0	0
0,1,0,-2,-4,-5	0	0	0	0	0	0	0.333333	0	0	1	0	0	1	0	0	0	0	0	0	1	0
0,-1,0,2,4,5	0	1	0	0	0	0	0	0	0.5	0	0	0	0	0	0	0	0	0	0	0	0
0,1,0,-2,5,0	0	0	0	0	0	0	0	0	0	1	0	0	0	0	0	0	0	0	0	0	0
0,1,0,-2,-5,0	0	0	0	0	0	0	0	0.6	0	0	0	0	0	0	0	0	0	0	0	0	0
0,1,0,-2,-5,1	0	0	0	0	0	0	0.5	0	0	0	0	0	0	0	0	0	0	0	0	0	0
0,-1,0,2,5,-1	0	0	0	0	0	0	0	0	0	0	0	0	0	0	0	1	0	0	0	0	0
0,1,0,-2,-5,-17	0	0	0	0	0	0	0	0.2	0	0	0	0	0	0	0	0	0	0	0	0	0
0,1,0,-2,-5,-2	0	0	0	0	0	0	0	0	0	0	0	1	0	0	0	0	0	0	0	0	0
0,-1,0,2,5,6	0	0	0	0	0	0	0	0	0	0	0	0	0	1	0	0	0	0	0	0	0
0,1,0,-2,-5,-7	0	0	0	0	0	0	0	0.2	0	0	0	0	0	0	0	0	0	0	0	0	0
0,1,0,-2,-5,-9	0	0	0	0	0	0	0.5	0	0	0	0	0	0	0	0	0	0	0	0	0	0
0,1,0,-2,-6,1	0	0	0	0	0	0	0	0	0	0	0	0	0	1	0	0	0	0	0	0	0
0,1,0,-2,-6,-7	0	0	1	0	0	0	0	0	0	0	0	0	0	0	0	0	0	0	0	0	0
0,1,0,-2,-7,-9	0	0	1	0	0	0	0	0	0	0	0	0	0	0	0	0	0	0	0	0	0
0,1,0,3,0,1	1	0	0	0	0	0	0	0	0	0	0	0	0	0	0	0	0	0	0	0	0
0,1,0,-3,0,-1	0	0	0	0	0	0	0	0	0	0	1	0	0	0	0	0	0	0	0	0	0
0,1,0,3,0,3	0	0	0	0	0	0	0	0	0	0	0	0	0	0	0	0	0	0	0	0	1
0,1,0,3,0,4	0	0	0	0	0	0	0	0	0	0	1	0	0	0	0	0	0	0	0	0	0
0,1,0,-3,1,0	0	0	0	0	0	0	0	0	0	0	0	0	0	1	0	0	0	0	0	0	0
0,1,0,-3,-2,0	0	1	0	0	0	0	0	0	0	0	0	0	0	0	0	0	0	0	0	0	0
0,1,0,-3,-2,1	0	0	0	0	0	0	1	0	0	0	0	0	0	0	0	0	0	0	0	0	0
0,1,0,3,2,3	1	0	0	0	0	0	0	0	0	0	0	0	0	0	0	0	0	0	0	0	0
0,-1,0,3,2,3	1	0	0	0	0	0	0	0	0	0	0	0	0	0	1	0	0	0	0	0	0
0,1,0,3,20,19	0	0	0	0	0	0	0	0	0	0	0	0	0	0	0	0	0	0	0	0	1
0,-1,0,3,3,0	0	0	0	0	0	0	0	0	0	0	0	0	0	0	1	0	0	0	0	0	0
0,-1,0,3,3,-4	0	0	0	0	0	0	0	0	0	0	0	0	0	0	0	0	1	0	0	0	0
0,1,0,3,4,3	0	0	0	0	0	0	0	0	0	0	1	0	0	0	0	0	0	0	0	0	0
0,-1,0,-3,-4,-3	1	0	1	0	0	0.5	0	0	0	0	0	0	0	0	0	0	0	0	0	0	0
0,-1,0,-3,-4,-4	0	0	0	0	0	0.5	0	0	0	0	0	0	0	0	0	0	0	0	0	0	0
0,-1,0,-3,-4,-6	0	0	0	0	0	0	0	0	0	0	1	0	0	0	0	0	0	0	0	0	0
0,-1,0,-3,-4,-7	0	0	0	0	0	0	1	0	0	0	0	0	0	0	0	0	0	0	0	0	0
0,1,0,-3,5,-3	0	0	0	0	0	0	0	0	0	0	0	0	0	1	0	0	0	0	0	0	0
0,-1,0,-3,5,6	1	0	0	0	0	0	0	0	0	0	0	0	0	0	0	0	0	0	0	0	0
0,1,0,-3,-5,-7	0	0	0	0	0	0	0	0	0	0	0	0	0	0	0	1	0	0	0	0	0
0,-1,0,-3,-6,-1	0	0	0	0	0	0	0	0	0	0	0	0	0	0	1	0	0	0	0	0	0
0,-1,0,3,6,11	0	0	0	0	0	1	1	0	0	0	0	0	0	0	0	0	0	0	0	0	0
0,-1,0,-3,-6,-3	0	0	1	0	0	0	0	0	0	0	0	0	0	0	0	0	0	0	0	0	0
0,-1,0,-3,-6,-5	0	0	0	1	0	0	0	0	0	0	0	0	0	0	0	0	0	0	0	0	0
0,1,0,-3,-6,-8	0	0	0	0	0	0	0	0	1	0	0	0	0	0	0	0	0	0	0	0	0
0,-1,0,-3,-6,-8	1	0	0	0	0	0	0	0	0	0	0	0	0	0	0	0	0	0	0	0	0
0,1,0,-3,-7,0	0	0	0	0	0	0	0	0	0	0	0	0	0.5	0	0	0	0	0	0	0	0
0,-1,0,3,7,10	0	0	1	0	0	0	0	0	0	0	0	0	0	0	0	0	0	0	0	0	0
0,1,0,-3,-7,-11	0	0	0	0	0	0	0	0	0	0	0	0	0.5	0	0	0	0	0	0	0	0
0,-1,0,3,7,11	0	0	0	0	0	0	0	0	0	0	0	0	1	0	0	0	0	0	0	0	0
0,-1,0,3,7,12	1	0	0	0	0	0	0	0	0	0	0	0	0	0	0	0	0	0	0	0	0
0,1,0,-3,-7,-5	0	1	0	0	0	0	0	0	0	0	0	0	0	0	0	0	0	0	0	0	0
0,-1,0,3,7,6	0	0	0	0	0	0	0	0	0	1	0	0	0	0	0	0	0	0	0	0	0
0,-1,0,-3,-7,-6	1	0	0	0	0	0	0	0	0	0	0	0	0	0	0	0	0	0	0	0	0
0,1,0,3,8,4	0	0	0	0	0	0	0	0	0	1	0	0	0	0	0	0	0	0	0	0	0
0,-1,0,-3,9,14	1	0	0	0	0	0	0	0	0	0	0	0	0	0	0	0	0	0	0	0	0
0,-1,0,4,3,0	0	0	0	0	0	0	0	0	0	0	0	0	0	1	0	0	0	0	0	0	0
0,-1,0,4,3,4	1	0	0	0	0	0	0	0	0	0	0	0	0	0	0	0	0	0	0	0	0
0,-1,0,-4,-3,-4	0	0	0	0	0	0	0	0	0	0	0	0	0	0	0	0	0	0	0	1	0
0,1,0,-4,-5,1	0	0	0	0	0	0	0	0	0	0	0	0	0	0.5	0	0	0	0	0	0	0
0,1,0,-4,-5,-2	0	0	0	0	0	0	0	0	0	0	0	0	0	0.5	0	0	0	0	0	0	0
0,-1,0,4,5,7	0	0	1	0	0	0	0	0	0	0	0	0	0	0	0	0	0	0	0	0	0
0,1,0,-4,-7,0	0	0	0	0	0	0	0	0	0	0	0	0	0.5	0	0	0	0	0	0	0	0
0,-1,0,-4,-7,-1	0	1	0	0	0	0	0	0	0	0	0	0	0	0	0	0	0	0	0	0	0
0,-1,0,4,7,10	0	0	0	0	0	0	0.333333	0	0	0	0	0	0	0	0	0	0	0	0	0	0
0,1,0,-4,-7,-11	0	1	0	0	0	0	0	0	0	0	0	0	0.5	0	0	0	0	0	0	0	0
0,-1,0,4,7,11	0	0	1	1	1	1	0	0	0	0	0	0	1	0	0	0	0	0	0	0	0
0,1,0,-4,-7,-12	0	0	1	0	0	0	0	0	0	0	0	0	0	0	0	0	0	0	0	0	0
0,-1,0,4,7,12	0	0	0	0	0	0	0.333333	0	0	0	0	0	0	0	0	0	0	0	0	0	0
0,1,0,-4,-7,-8	0	0	0	0	0	0	0	0	0	0	0	0	0	1	0	0	0	0	0	0	0
0,-1,0,4,7,8	0	0	0	0	0	0	0.333333	0	0	0	0	0	0	0	0	0	0	0	0	0	0
0,-1,0,4,8,11	0	0	0	0	0	0	0	0	0	0	0	0	1	0	0	0	0	0	0	0	0
0,1,0,-4,-8,-6	0	0	0	0	0	0	0	0	0	0	0	0	0	0	0	0	0	1	0	0	0
0,-1,0,-4,-9,0	0	0	0	0	0	0	0	0	0	0	0	0	0	0	0	0	0	0	0	0	1
0,1,0,-4,-9,-8	0	0	0	0	0	0	0	0	0	0	0	0	1	0	0	0	0	0	0	0	0
0,-1,0,-5,-10,-12	0	1	0	0	0	0	0	0	0	0	0	0	0	0	0	0	0	0	0	0	0
0,1,0,-5,-11,-5	1	0	0	0	0	0	0	0	0	0	0	0	0	0	0	0	0	0	0	0	0
0,-1,0,-5,-3,-4	0	0	0	0	0	0	0	0	0	0	0	0	0	0	0	0	0	0	0	1	0
0,1,0,-5,-4,-5	0	1	0	0	0	0	0	0	0	0	0	0	0	0	0	0	0	0	0	0	0
0,1,0,-5,-6,-5	0	0	0	0	0	0	0	0	0	0	0	0	0	1	0	0	0	0	0	0	0
0,-1,0,5,6,5	0	0	0	0	0	0	0	0	0	0	0	0	0	0.5	0	0	0	0	0	0	0
0,-1,0,5,6,6	0	0	0	0	0	0	0	0	0	0	0	0	0	0.5	0	0	0	0	0	0	0
0,1,0,5,8,12	0	1	0	0	0	0	0	0	0	0	0	0	0	0	0	0	0	0	0	0	0
0,-1,0,-5,-8,-7	1	0	0	0	0	0	0	0	0	0	0	0	0	0	0	0	0	0	0	0	0
0,1,0,6,5,4	0	0	0	0	0	1	0	0	0	0	0	0	0	0	0	0	0	0	0	0	0
0,1,0,6,6,3	1	0	0	0	0	0	0	0	0	0	0	0	0	0	0	0	0	0	0	0	0
0,-1,0,6,7,0	0	0	0	0	0	0	0	0	0	0	0	0	0	1	0	0	0	0	0	0	0
0,1,0,-6,-7,-6	0	0	0	0	0	0	0	0	0	0	0	0	0	1	0	0	0	0	0	0	0
0,-1,0,7,11,14	1	0	0	0	0	0	0	0	0	0	0	0	0	0	0	0	0	0	0	0	0
0,1,0,-7,-5,3	0	1	0	0	0	0	0	0	0	0	0	0	0	0	0	0	0	0	0	0	0
0,-1,0,8,0,3	0	0	0	0	0	0	0	0	0	0	1	0	0	0	0	0	0	0	0	0	0
0,1,0,-8,-10,-12	0	1	0	0	0	0	0	0	0	0	0	0	0	0	0	0	0	0	0	0	0
0,-1,0,-8,-10,-8	0	0	1	0	0	0	0	0	0	0	0	0	0	0	0	0	0	0	0	0	0
0,1,0,8,4,1	1	0	0	0	0	0	0	0	0	0	0	0	0	0	0	0	0	0	0	0	0
0,1,0,-9,-10,-7	0	0	0	1	0	0	0	0	0	0	0	0	0	0	0	0	0	0	0	0	0
0,1,0,9,11,8	0	0	0	0	0	0	0	0	0	0	0	0	0	0	0	0	1	0	0	0	0
0,1,0,9,5,10	0	0	0	0	0	0	0	0	0	0	0	0	1	0	0	0	0	0	0	0	0
0,-1,0,9,6,2	0	0	0	0	0	0	0	0	0	0	0	0	0	1	0	0	0	0	0	0	0
0,1,1,0,0,0	0	0	0	0	0	0	0	0	0	0	0	0	0	0	0	1	0	0	0	0	0
0,1,-1,0,1,0	0	0	1	0	0	0	0	0	0	0	0	0	0	0	0	0	0	0	0	0	0
0,1,1,0,1,2	0	0	0	0	0	0	0	0	0	0	0	0	0	0.75	0	0	0	0	0	0	0
0,1,1,0,-1,-2	0	0	0	0	0	0	0	0	0	0	0	0	0	1	0	0	0	0	0	0	0
0,1,-1,0,-1,-2	1	0	0	0	0	0	0	0	0	0	1	0	0	0	0	0	0	0	0	0	0
0,-1,-1,0,1,2	0	0	0	0	0	0	0	0	0	0	1	0	0	0	0	0	0	0	0	0	0
0,-1,-1,0,-1,2	0	0	0	0	0	0	0	0	0	0	0.333333	0	0	0	0	0	0	0	0	0	0
0,-1,-1,0,-1,-2	0	0	0	0	0	0	0	0	0	0	0.666667	0	0	0	0	0	0	0	0	0	0
0,1,1,0,1,3	0	0	0	0	0	0	0	0	0	0	0	0	0	0.25	0	0	0	0	0	0	0
0,-1,1,0,1,3	1	0	0	0	0	0	0	0	0	0	0	0	0	0	0	0	0	0	0	0	0
0,-1,-1,0,-1,-3	0	1	0	0	0	0	0	0	0	0	0	0	0	0	0	0	0	0	0	0	0
0,-1,-1,0,-1,-5	0	0	0	0	0	0	0	0	0	0	0	0	1	0	0	0	0	0	0	0	0
0,1,1,0,1,-7	0	0	1	0	0	0	0	0	0	0	0	0	0	0	0	0	0	0	0	0	0
0,-1,-1,0,2,0	0	1	0	0	0	0	0	0	0	0	0	0	0	0	0	0	0	0	0	0	0
0,-1,-1,0,-2,-1	0	0	1	0	0	0	0	0	0	0	0	0	0	0	0	0	0	0	0	0	0
0,-1,1,0,-2,2	0	0	0	0	0	0	0	0	0	0	1	0	0	0	0	0	0	0	0	0	0
0,1,-1,0,-2,-3	0	1	0	0	0	0	0	0	0	0	0	0	0	0	0	0	0	0	0	0	0
0,1,-1,0,-2,-4	0	0	0	1	0	0	0	0	0	0	0	0	0	0	0	0	0	0	0	0	0
0,1,-1,0,-3,-2	0	0	0	0	0	0	0	0	0	0	1	0	0	0	0	0	0	0	0	0	0
0,-1,-1,0,3,4	0	1	0	0	0	0	0	0	0	0	0	0	0	0	0	0	0	0	0	0	0
0,-1,-1,0,-4,-3	0	0	0	0	1	0	0	0	0	0	0	0	0	0	0	0	0	0	0	0	0
0,1,1,0,-4,-7	0	1	0	0	0	0	0	0	0	0	0	0	0	0	0	0	0	0	0	0	0
0,1,-1,0,-4,-7	0	0	0	0	1	0	0	0	0	0	0	0	0	0	0	0	0	0	0	0	0
0,-1,-1,0,4,7	0	0	0	0	1	0	0	0	0	0	0	0	0	0	0	0	0	0	0	0	0
0,-1,-1,0,4,8	0	0	0	0	0	0	1	0	0	0	0	0	0	0	0	0	0	0	0	0	0
0,-1,-1,0,-5,-5	0	0	0	1	0	0	0	0	0	0	0	0	0	0	0	0	0	0	0	0	0
0,1,-1,0,7,8	0	0	1	0	0	0	0	0	0	0	0	0	0	0	0	0	0	0	0	0	0
0,1,-1,0,-9,-6	0	0	0	1	0	0	0	0	0	0	0	0	0	0	0	0	0	0	0	0	0
0,-1,-1,-1,0,-2	0	0	0	0	0	0	0	0	0	0	1	0	0	0	0	0	0	0	0	0	0
0,-1,-1,-1,0,-8	0	0	0	0	0	0	0	0	1	0	0	0	0	0	0	0	0	0	0	0	0
0,-1,-1,-1,-1,0	0	0	0	0	0	0	0	0	0	0	0	0	0.5	0	0	0	0	0	0	0	0
0,1,1,1,1,1	0	0	0	0	0	0	0	0	0	0	1	0	1	0	0	0	0	0	0	0	0
0,1,-1,-1,-1,-1	0	0	0	0	0	0	0	0	0	0	1	0	0	0	0	0	0	0	0	0	0
0,-1,1,1,-1,22	0	0	0	0	0	0	0	0	0	0	1	0	0	0	0	0	0	0	0	0	0
0,1,1,1,1,-3	0	0	0	0	0	0	0	0	0	0	0	0	0	0	0	0	0	0	0	0	1
0,1,-1,1,-1,-3	0	0	0	0	1	0	0	0	0	0	0	0	0	0	0	0	0	0	0	0	0
0,1,-1,1,-1,-4	0	0	0	0	0	1	0	0	0	0	0	0	0	0	0	0	0	0	0	0	0
0,1,1,1,-1,6	0	1	0	0	0	0	0	0	0	0	0	0	0	0	0	0	0	0	0	0	0
0,-1,-1,-1,-1,8	0	0	0	0	0	0	0	0	0	0	0	0	0.5	0	0	0	0	0	0	0	0
0,-1,1,-1,-2,0	0	0	0	0	0	0	0	0	0	0	1	0	0	0	0	0	0	0	0	0	0
0,1,1,1,2,1	0	0	0	0	0	0	0	0	0	0	0	0	0	0	0	0	0	0	0	0	1
0,1,-1,1,2,1	0	0	0	1	0	0	0	0	0	0	0	0	0	0	0	0	0	0	0	0	0
0,-1,1,-1,-2,3	0	0	0	0	0	1	0	0	0	0	0	0	0	0	0	0	0	0	0	0	0
0,1,1,-1,-2,-9	0	0	0	0	0	0	0	0	0	0	0	0	0	1	0	0	0	0	0	0	0
0,-1,1,-1,3,1	0	0	0	0	0	0	0	0	0	0	0	0	0	0	0	1	0	0	0	0	0
0,-1,1,-1,-3,-1	0	0	0	0	0	0	0	0	1	0	0	0	0	0	0	0	0	0	0	0	0
0,-1,-1,-1,-3,-1	0	0	0	0	0	0	0	0	0	0	0	0	0	0	0	1	0	0	0	0	0
0,1,-1,1,3,4	0	0	0	0	0	1	0	0	0	0	0	0	0	0	0	0	0	0	0	0	0
0,1,1,1,3,5	0	0	1	0	0	0	0	0	0	0	0	0	0	0	0	0	0	0	0	0	0
0,-1,-1,1,3,-9	0	0	0	0	0	0	0	0	0	0	0	0	0	0	0	0	0	0	0	0	1
0,-1,-1,1,-3,9	0	0	0	0	0	0	0	0	1	0	0	0	0	0	0	0	0	0	0	0	0
0,1,-1,1,5,8	0	0	0	0	1	0	0	0	0	0	0	0	0	0	0	0	0	0	0	0	0
0,-1,-1,-1,6,4	0	0	0	0	0	0	0	0	0	1	0	0	0	0	0	0	0	0	0	0	0
0,1,1,1,-8,1	0	0	0	0	0	0	0	0	0	0	0	0	0	0	0	0	0	0	0	0	1
0,1,1,11,5,23	0	0	0	0	0	0	0	0	0	1	0	0	0	0	0	0	0	0	0	0	0
0,-1,-1,-12,-8,-6	0	0	0	0	0	0	0	0	0	0	0	0	0	0	0	1	0	0	0	0	0
0,1,1,13,9,6	0	0	0	0	0	1	0	0	0	0	0	0	0	0	0	0	0	0	0	0	0
0,-1,1,-16,-11,-7	0	0	0	0	0	0	0	0	0	0	1	0	0	0	0	0	0	0	0	0	0
0,-1,-1,2,0,0	0	0	0	0	0	0	0	0	0	0	0	0	0	0	0	0	0	0	1	0	1
0,1,-1,-2,0,2	0	0	1	0	0	0	0	0	0	0	0	0	0	0	0	0	0	0	0	0	0
0,-1,1,-2,0,-4	0	0	0	0	0	0	0	0	0	0	0	0	0	0	0	0	0	0	0	1	0
0,-1,-1,-2,1,0	0	0	0	0	0	0	0	0	0	0	0	0	0	0	0	0	0	0	0	0	1
0,-1,-1,-2,-1,1	0	0	0	0	0	1	0	0	0	0	0	0	0	0	0	0	0	0	0	0	0
0,1,-1,-2,-1,-2	0	0	0	1	0	0	0	0	0	0	0	0	0	0	0	0	0	0	0	0	0
0,-1,1,-2,-1,-2	1	0	0	0	0	0	0	0	0	0	0	0	0	0	0	0	0	0	0	0	0
0,-1,-1,2,-1,2	1	0	0	0	0	0	0	0	0	0	0	0	0	0	0	0	0	0	0	0	0
0,1,1,2,-2,2	0	0	0	0	0	0	0	0	0	0	0	0	1	0	0	0	0	0	0	0	0
0,-1,-1,2,-2,24	0	0	0	0	0	0	0	0	0	0	0	0	0	0	0	0	0	0	0	0	1
0,-1,-1,-2,-2,-3	0	0	0	0	0	0	0	0	0	0	0.5	0	0	0	0	0	0	0	0	0	0
0,-1,-1,-2,-2,-4	0	0	0	0	0	0	0	0	0	0	0.5	0	0	0	0	0	0	0	0	0	0
0,1,1,2,3,4	0	0	0	1	0	0	0	0	0	0	0	0	0	0	0	0	0	0	0	0	0
0,-1,-1,2,-3,4	0	0	0	0	0	0	0	0	0	0	0	0	0	0	0	0	0	0	1	0	0
0,1,1,-2,-3,-5	0	1	0	0	0	0	0	0	0	0	0	0	0	0	0	0	0	0	0	0	0
0,1,-1,-2,-5,-5	0	0	0	0	0	0	0	0	0	0	0	0	0	1	0	0	0	0	0	0	0
0,1,-1,-2,-5,-6	1	0	0	0	0	1	0	0	0	0	0	0	0	0	0	0	0	0	0	0	0
0,1,1,-2,-5,-7	0	0	1	0	0	0	0	0	0	0	0	0	0	1	0	0	0	0	0	0	0
0,1,1,2,5,9	0	0	0	0	0	1	0	0	0	0	0	0	0	0	0	0	0	0	0	0	0
0,1,-1,-2,-6,-10	0	1	0	0	0	0	0	0	0	0	0	0	0	0	0	0	0	0	0	0	0
0,1,1,-2,-6,-7	0	0	0	0	0	0	0	0	0	0	0	0	0	0	1	0	0	0	0	0	0
0,1,1,-2,-7,-11	0	0	0.5	0	0	0	0	0	0	0	0	0	0	0	0	0	0	0	0	0	0
0,-1,-1,2,7,11	0	0	0	0	0	0	0	0	0	0	0	0	0	1	0	0	0	0	0	0	0
0,1,1,-2,-7,-3	0	0	0.5	0	0	0	0	0	0	0	0	0	0	0	0	0	0	0	0	0	0
0,-1,-1,-22,-18,-15	0	0	0	0	0	0	0	0	0	0	0	0	0	0	0	0	0	0	0	0	1
0,1,1,-3,-1,0	0	1	0	0	0	0	0	0	0	0	0	0	0	0	0	0	0	0	0	0	0
0,-1,-1,-3,-1,-1	0	0	0	0	0	0	0	0	0	0	1	0	0	0	0	0	0	0	0	0	0
0,-1,-1,-3,-1,-3	0	0	0	0	0	0	0	0	1	0	0	0	0	0	0	0	0	0	0	0	0
0,1,1,-3,-2,0	0	1	0	0	0	0	0	0	0	0	0	0	0	0	0	0	0	0	0	0	0
0,1,-1,-3,-2,-4	0	0	0	1	0	0	0	0	0	0	0	0	0	0	0	0	0	0	0	0	0
0,1,1,3,3,4	0	1	0	0	0	0	0	0	0	0	0	0	0	1	0	0	0	1	0	0	0
0,-1,-1,-3,-3,-4	0	0	0	0	0	0	0	0	0	0	1	0	0	0	0	0	0	0	0	0	0
0,1,1,3,3,5	0	0	0	0	0	0	0	0	1	0	0	0	0	0	0	0	0	0	0	0	0
0,1,1,-3,-3,-7	1	0	0	0	0	0	0	0	0	0	0	0	0	0	0	0	0	0	0	0	0
0,1,-1,-3,-4,-1	0	0	0	0	0	0	0	0	1	0	0	0	0	0	0	0	0	0	0	0	0
0,1,-1,-3,4,2	0	0	0	0	0	0	0	0	0	0	0	0	0	0	0	1	0	0	0	0	0
0,1,-1,-3,-4,-5	0	0	0	1	0	0	0	0	0	0	0	0	0	0	0	0	0	0	0	0	0
0,1,1,3,4,6	0	0	0	0	0	0	0	0	0	0	0	0	0	0	0	0	0	0	0	1	0
0,1,1,3,-5,-4	0	0	0	0	1	0	0	0	0	0	0	0	0	0	0	0	0	0	0	0	0
0,-1,-1,-3,-5,-8	0	0	0	0	0	0	0	0	0	0	0	1	0	0	0	0	0	0	0	0	0
0,1,-1,-3,-6,1	0	0	0	0	1	0	0	0	0	0	0	0	0	0	0	0	0	0	0	0	0
0,1,-1,-3,-6,-1	0	0	0	0	0	0	0	0	0	0	0	0	0	0	0	0	1	0	0	0	0
0,1,1,-3,-6,-10	0	0	0	0	0	0	0	0	0	0	0	0	1	0	0	0	0	0	0	0	0
0,1,-1,-3,-6,-10	0	0	0	0	0	1	1	0	0	0	0	0	0	0	0	0	0	0	0	0	0
0,-1,-1,-3,-6,-10	0	0	0	0	0	0	0	0	0	0	1	0	0	0	0	0	0	0	0	0	0
0,-1,1,3,6,13	0	0	0	0	0	0	0	0	0	0	0	0	0	0	1	0	0	0	0	0	0
0,1,1,-3,-6,-3	0	0	1	0	0	0	0	0	0	0	0	0	0	0	0	0	0	0	0	0	0
0,-1,1,3,6,3	0	0	1	0	0	0	0	0	0	0	0	0	0	0	0	0	0	0	0	0	0
0,1,1,3,6,7	0	0	0	0	0	0	0	0	0	0	0	0	0	0	0	1	0	0	0	0	0
0,1,-1,-3,-6,-8	0	0	0	0	0	0	0	0	0	0	0	0	1	0	0	0	0	0	0	0	0
0,-1,-1,3,8,-1	0	0	0	0	0	0	0	0	0	0	0	0	0	0	0	1	0	0	0	0	0
0,1,-1,4,1,-3	0	0	0	0	0	0	0	0	0	0	1	0	0	0	0	0	0	0	0	0	0
0,-1,1,4,1,6	0	0	0	0	0	0	0	0	0	0	0	0	0	0	0	0	1	0	0	0	0
0,1,1,-4,-11,-5	0	0	1	0	0	0	0	0	0	0	0	0	0	0	0	0	0	0	0	0	0
0,-1,-1,-4,-3,1	1	0	0	0	0	0	0	0	0	0	0	0	0	0	0	0	0	0	0	0	0
0,1,-1,4,3,2	0	0	0	0	0	0	1	0	0	0	0	0	0	0	0	0	0	0	0	0	0
0,-1,-1,4,3,7	0	0	0	0	0	0	0	0	0	0	0	0	0	0	0	0	0	0	0	0	1
0,-1,-1,-4,-4,-3	0	1	0	0	0	0	0	0	0	0	0	0	0	0	0	0	0	0	0	0	0
0,1,1,4,4,5	0	0	0	0	0	0	0	0	0	0	1	0	0	0	0	0	0	0	0	0	0
0,1,1,4,4,7	0	0	0	0	0	0	0	0	0	0	0	0	0	1	0	0	0	0	0	0	0
0,1,1,-4,-6,-11	0	0	1	0	0	0	0	0	0	0	0	0	0	0	0	0	0	0	0	0	0
0,1,1,-4,-8,-11	0	0	1	0	0	0	0	0	0	0	0	0	0	0	0	0	0	0	0	0	0
0,1,-1,-4,-8,-11	0	0	0	0	1	0	0	0	0	0	0	0	0	0	0	0	0	0	0	0	0
0,1,-1,-4,-8,-3	0	0	0	1	0	0	0	0	0	0	0	0	0	0	0	0	0	0	0	0	0
0,-1,-1,-5,-1,2	0	1	0	0	0	0	0	0	0	0	0	0	0	0	0	0	0	0	0	0	0
0,-1,1,-5,-3,-2	0	0	0	0	0	0	0	0	0	0	0	0	1	0	0	0	0	0	0	0	0
0,-1,-1,-5,-4,-5	0	1	0	0	0	0	0	0	0	0	0	0	0	0	0	0	0	0	0	0	0
0,-1,1,5,7,5	0	0	1	0	0	0	0	0	0	0	0	0	0	0	0	0	0	0	0	0	0
0,1,1,5,8,5	1	0	0	0	0	0	0	0	0	0	0	0	0	0	0	0	0	0	0	0	0
0,-1,-1,-5,-8,-8	0	0	0	0	0	0	0	0	0	0	0	0	0	0	0	0	0	1	0	0	0
0,-1,1,-6,-1,-6	0	0	0	0	0	1	0	0	0	0	0	0	0	0	0	0	0	0	0	0	0
0,1,-1,-6,-10,-11	0	1	0	0	0	0	0	0	0	0	0	0	0	0	0	0	0	0	0	0	0
0,1,-1,-6,-10,-2	0	0	0	0	0	0	1	0	0	0	0	0	0	0	0	0	0	0	0	0	0
0,-1,-1,6,4,-1	0	0	0	0	0	0	0	0	0	0	0	0	1	0	0	0	0	0	0	0	0
0,1,1,6,7,10	0	0	0	0	0	0	0	0	0	0	0	0	0	1	0	0	0	0	0	0	0
0,1,1,-7,-5,-3	0	0	0	1	0	0	0	0	0	0	0	0	0	0	0	0	0	0	0	0	0
0,1,1,-8,-5,-1	0	0	0	0	0	0	0	0	0	0	0	0	0	1	0	0	0	0	0	0	0
0,-1,-1,-8,-5,-1	0	0	0	0	0	0	0	0	0	0	0	0	1	0	0	0	0	0	0	0	0
0,1,1,-8,-6,-5	0	0	0	1	0	0	0	0	0	0	0	0	0	0	0	0	0	0	0	0	0
0,-1,-10,-11,-8,-5	0	0	0	1	0	0	0	0	0	0	0	0	0	0	0	0	0	0	0	0	0
0,-1,10,4,1,13	0	0	0	0	0	0	0	0	0	0	0	0	0	0	0	1	0	0	0	0	0
0,-1,-10,-5,-1,-2	0	0	0	0	0	0	0	0	0	0	1	0	0	0	0	0	0	0	0	0	0
0,1,-10,-6,-2,1	0	0	0	0	0	0	0	0	0	0	0	0	1	0	0	0	0	0	0	0	0
0,-1,10,6,3,2	0	0	0	0	0	1	0	0	0	0	0	0	0	0	0	0	0	0	0	0	0
0,-1,-10,-6,-4,-2	0	0	0	0	0	0	0	0	0	0	0	0	0	0	0	0	0	0	0	0	1
0,1,10,7,3,11	0	0	0	0	0	0	0	0	0	0	0	0	0	1	0	0	0	0	0	0	0
0,-1,10,7,6,1	0	0	0	0	0	0	0	0	0	0	0	0	0	1	0	0	0	0	0	0	0
0,-1,-10,-7,-6,-3	0	0	0	0	0	1	0	0	0	0	0	0	0	0	0	0	0	0	0	0	0
0,1,10,9,4,6	0	0	0	0	0	0	1	0	0	0	0	0	0	0	0	0	0	0	0	0	0
0,-1,11,10,9,8	0	0	0	0	0	1	0	0	0	0	0	0	0	0	0	0	0	0	0	0	0
0,-1,11,11,12,15	0	0	0	0	0	0	0	0	0	0	1	0	0	0	0	0	0	0	0	0	0
0,1,11,11,9,9	0	0	0	0	0	0	0	0	0	0	1	0	0	0	0	0	0	0	0	0	0
0,1,-11,2,1,-1	1	0	0	0	0	0	0	0	0	0	0	0	0	0	0	0	0	0	0	0	0
0,1,11,20,18,16	0	0	0	0	0	0	0	0	1	0	0	0	0	0	0	0	0	0	0	0	0
0,-1,11,7,4,0	0	0	0	0	1	0	0	0	0	0	0	0	0	0	0	0	0	0	0	0	0
0,1,-11,-7,-6,0	0	0	0	0	0	0	0	0	0	0	0	0	0	0	0	0	0	0	0	1	0
0,1,11,8,4,13	0	0	0	0	1	0	0	0	0	0	0	0	0	0	0	0	0	0	0	0	0
0,1,11,8,9,6	1	0	0	0	0	0	0	0	0	0	0	0	0	0	0	0	0	0	0	0	0
0,1,12,10,5,1	0	1	0	0	0	0	0	0	0	0	0	0	0	0	0	0	0	0	0	0	0
0,1,12,10,9,8	0	0	0	0	0	1	0	0	0	0	0	0	0	0	0	0	0	0	0	0	0
0,1,12,13,14,15	1	0	0	0	0	0	0	0	0	0	0	0	0	0	0	0	0	0	0	0	0
0,-1,-12,-15,-10,-7	0	0	0	0	0	0	0	0	0	0	0	0	0	1	0	0	0	0	0	0	0
0,1,12,8,5,2	0	1	0	0	0	0	0	0	0	0	0	0	0	0	0	0	0	0	0	0	0
0,1,13,11,8,6	0	0	0	0	1	0	0	0	0	0	0	0	0	0	0	0	0	0	0	0	0
0,1,13,11,8,9	0	0	0	0	0	0	1	0	0	0	0	0	0	0	0	0	0	0	0	0	0
0,1,-13,-12,7,4	1	0	0	0	0	0	0	0	0	0	0	0	0	0	0	0	0	0	0	0	0
0,1,13,2,12,3	0	0	0	0	1	0	0	0	0	0	0	0	0	0	0	0	0	0	0	0	0
0,1,13,7,14,7	0	0	0	0	0	0	0	0	0	0	1	0	0	0	0	0	0	0	0	0	0
0,-1,-13,-8,-6,-5	0	0	0	0	0	0	0	0	1	0	0	0	0	0	0	0	0	0	0	0	0
0,-1,13,9,5,6	0	0	0	0	1	0	0	0	0	0	0	0	0	0	0	0	0	0	0	0	0
0,-1,-14,-14,-2,-2	0	0	0	0	0	0	0	0	0	0	0	0	0	0	0	0	0	0	0	0	1
0,1,-14,-16,1,-11	0	0	0	0	0	0	0	0	0	0	0	0	0	0	0	0	0	0	0	1	0
0,1,15,15,16,13	0	0	1	0	0	0	0	0	0	0	0	0	0	0	0	0	0	0	0	0	0
0,1,-15,-7,-14,-13	0	0	0	1	0	0	0	0	0	0	0	0	0	0	0	0	0	0	0	0	0
0,1,17,12,15,19	0	0	0	0	0	0	0	0	0	0	0	0	1	0	0	0	0	0	0	0	0
0,1,-18,-16,-14,-12	0	0	0	0	0	0	0	0	0	0	0	0	0	0	0	1	0	0	0	0	0
0,1,18,18,16,1	0	0	0	0	0	0	0	0	0	0	0	0	0	0	0	0	0	0	0	0	1
0,-1,2,0,-1,0	0	1	0	0	0	0	0	0	0	0	0	0	0	0	0	0	0	0	0	0	0
0,-1,2,0,-1,-2	0	0	0	0	0	1	0	0	0	0	0	0	0	0	0	0	0	0	0	0	0
0,1,2,0,1,-3	0	0	0	0	1	0	0	0	0	0	0	0	0	0	0	0	0	0	0	0	0
0,1,-2,0,1,3	0	0	0	1	0	0	0	0	1	0	0	0	0	0	0	0	0	0	0	0	0
0,1,-2,0,1,-5	0	0	0	0	0	0	0	0	0	0	0	0	0	0.333333	0	0	0	0	0	0	0
0,1,-2,0,1,-6	0	0	0	0	0	0	0	0	0	0	0	0	0	0.333333	0	0	0	0	0	0	0
0,1,-2,0,1,-7	0	0	0	0	0	0	0	0	0	0	0	0	0	0.333333	0	0	0	0	0	0	0
0,-1,2,0,11,9	0	1	0	0	0	0	0	0	0	0	0	0	0	0	0	0	0	0	0	0	0
0,1,2,0,2,0	0	0	0	0	1	0	0	0	0	0	0	0	0	0	0	0	0	0	0	0	0
0,1,-2,0,-2,0	0.333333	0	0	0	0	0	0	0	0	0	0	0	0	0	0	0	0	0	0	0	0
0,1,-2,0,-2,1	0.333333	0	0	0	0	0	0	0	0	0	0	0	0	0	0	0	0	0	0	0	0
0,-1,-2,0,-2,-3	0	0	0	0	0	1	0	0	0	0	0	0	0	0	0	0	0	0	0	0	0
0,1,2,0,-2,-5	0	0	0	0	1	0	0	0	0	0	0	0	0	0	0	0	0	0	0	0	0
0,1,-2,0,-2,-5	0.333333	0	0	0	0	0	0	0	0	0	0	0	0	0	0	0	0	0	0	0	0
0,1,-2,0,3,0	0	0	0	0	0	0	0	0	0	0	0	0	0	0	0.5	0	0	0	0	0	0
0,-1,2,0,3,0	0	0	1	0	0	0	0	0	0	0	0	0	0	0	0	0	0	0	0	0	0
0,1,-2,0,3,-2	0	0	0	0	0	0	0	0	0	0	0	0	0	0	0.5	0	0	0	0	0	0
0,1,-2,0,-3,-2	1	0	0	0	0	0	0	0	0	0	0	0	0	0	0	0	0	0	0	0	0
0,-1,2,0,-3,-8	1	0	0	0	0	0	0	0	0	0	0	0	0	0	0	0	0	0	0	0	0
0,1,-2,0,-4,0	0	0	0	0	0	0	0	1	0	0	0	0	0	0	0	0	0	0	0	0	0
0,1,-2,0,-4,-2	0	0	0	0	0	0	0	0	0.5	0	0	0	0	0	0	0	0	0	0	0	1
0,1,-2,0,-4,-4	0	0	0	0	0	0	0	0	0.5	0	0	0	0	0	0	0	0	0	0	0	0
0,-1,2,0,4,5	0	0	0	0	0	0	0	0	0	0	0	0	0	0	0	0	0	0	0	0	1
0,1,-2,0,5,1	0	0	0	0	0	0	0	0	0	0	0	0	0	0	0.5	0	0	0	0	0	0
0,1,2,0,5,2	0	0	0	0	0	0	0	0	0	0	1	0	0	0	0	0	0	0	0	0	0
0,1,-2,0,-5,-2	0	0	0	0	0	0	1	0	0	0	0	0	0	0	0	0	0	0	0	0	0
0,-1,2,0,-5,-2	0	0	0	0	0	0	1	0	0	0	0	0	0	0	0	0	0	0	0	0	0
0,1,-2,0,5,6	0	0	0	0	0	0	0	0	0	0	0	0	0	0	0.5	0	0	0	0	0	0
0,-1,2,0,-5,-9	0	0	0	0	1	0	0	0	0	0	0	0	0	0	0	0	0	0	0	0	0
0,-1,-2,0,-6,-4	0	0	0	0	0	0	0	0	0	0	0	0	1	0	0	0	0	0	0	0	0
0,-1,-2,0,-7,-2	0	0	0	0	0	1	0	0	0	0	0	0	0	0	0	0	0	0	0	0	0
0,1,2,1,0,1	0	0	1	0	0	0	0	0	0	0	0	0	0	0	0	0	0	0	0	0	0
0,1,2,1,0,-1	1	1	0	1	0	0.333333	0	0	0	0	1	0	0	0	0	0	0	0	0	0	0
0,-1,2,1,0,-1	0	0	0	0	0	1	0	0	1	0	0	0	0	0	0	0	0	0	0	0	0
0,-1,2,-1,0,-1	1	0	0	0	0	0	0	0	0	0	0	0	0	0	0	0	0	0	0	0	0
0,-1,-2,1,0,-1	0	0	0	0	0	1	0	0	1	0	0	0	0	0	0	0	0	0	0	0	0
0,-1,-2,-1,0,1	0	0	0	0	0	0	0	0	0	0	1	0	0	0.5	0	0	0	0	0	0	0
0,-1,-2,-1,0,-1	0	0	0	0	0	0	0	0	0	0	0	0	0	0.5	0	0	0	0	0	0	0
0,1,2,1,0,-2	0	0	0	0	0	0.666667	0	0	0	0	0	0	0	0	0	0	0	0	0	0	0
0,1,-2,1,0,-2	1	0	0	0	0	0	0	0	0	0	0	0	0	0	0	0	0	0	0	0	0
0,-1,2,-1,0,2	0	0	0	0	0	0	0	0	1	0	0	0	0	0.5	0	0	0	0	0	0	0
0,-1,-2,-1,0,2	0	0	0	1	0	0	0	0	0	0	0	0	0	0	0	0	0	0	0	0	0
0,-1,2,-1,0,-3	0	0	0	0	0	0	0	0	0	0	0	0	0	0.5	0	0	0	0	0	0	1
0,-1,2,-1,0,4	0	0	0	0	0	0	1	0	0	0	0	0	0	0	0	0	0	0	0	0	0
0,1,-2,-1,0,-7	1	0	0	0	0	0	0	0	0	0	0	0	0	0	0	0	0	0	0	0	0
0,-1,-2,-1,1,0	0	0	0	0	0	0	0	0	0	0	0	0	0	0	0	0	0	0	0	0	1
0,-1,-2,1,1,-1	0	1	0	0	0	0	0	0	0	0	0	0	0	0	0	0	0	0	0	0	0
0,-1,-2,1,-1,-2	0	0	0	0	0	1	0	0	0	0	0	0	0	0	0	0	0	0	0	0	0
0,-1,-2,-1,1,2	0	0	0	0	0	0	1	0	0	0	0	0	0	0	0	0	0	0	0	0	0
0,1,-2,-1,1,-3	0	0	0	0	0	0	0	0	0	0	0	0	0	0	0	1	0	0	0	0	0
0,1,2,1,-1,-5	0	0	0	0	0	0	0	0	0	0	0	0	0	1	0	0	0	0	0	0	0
0,-1,2,1,1,6	0	0	0	0	0	0	0	0	0	0	0	0	0	0	0	0	0	0	0	0	1
0,-1,-2,1,-1,-6	0	0	0	0	0	0	1	0	0	0	0	0	0	0	0	0	0	0	0	0	0
0,1,2,1,2,1	0	1	0	0	0	0	0	0	1	0	0	0	0	0	0	0	0	0	0	0	0
0,1,2,-1,2,1	1	0	0	0	0	0	0	0	0	0	0	0	0	0	0	0	0	0	0	0	0
0,1,2,-1,-2,-1	0	0	0	0	0	0.333333	0	0	0	0	0	0	0	0	0	0	0	0	0	0	0
0,1,-2,1,-2,1	0	0	0	0	0	0	0	0	0	0	1	0	0	0	0	0	0	0	0	0	0
0,-1,2,1,2,-1	1	0	0	0	0	0	0	0	0	0	0	0	0	0	0	0	0	0	0	0	0
0,-1,2,-1,2,-1	0	0	0	0	0	0	0	0	0	1	0	0	0	0	0	0	0	0	0	0	0
0,-1,-2,1,-2,-1	0	0	0	0	0	0	0	0	0	0	0	0	0	1	0	0	0	0	0	0	0
0,-1,-2,-1,-2,-2	0	0	0	0	0	0	0	0	0	0	0.133333	0	0	0	0	0	0	0	0	0	0
0,1,2,1,2,3	0	0	0	0	0	0	0	0	0	0	0	0	0	1	0	0	0	0	0	0	0
0,1,2,-1,-2,-3	1	0	0	0	0	0.333333	0	0	0	0	0	0	0	0	0	0	0	0	0	0	0
0,-1,2,-1,-2,-3	0	0	0	0	0	1	0	0	0	0	0	0	0	0	0	0	0	0	0	0	0
0,-1,-2,1,-2,-3	0	0	0	0	0	1	0	0	0	0	0	0	0	0	0	0	0	0	0	0	0
0,-1,-2,-1,-2,-3	0	0	0	0	0	0	0	0	0	0	0.8	0	0	1	0	0	0	0	0	0	0
0,1,2,-1,-2,-4	0	0	0	0	0	0.333333	0	0	0	0	0	0	0	0	0	0	0	0	0	0	0
0,-1,2,-1,2,4	0	0	0	0	0	0	0	0	0	0	0	0	0	0	0	0	0	0	0	0	1
0,-1,-2,-1,-2,-4	0	0	0	0	0	0	1	0	0	0	0	0	0	0	0	0	0	0	0	0	0
0,-1,-2,-1,-2,-5	0	0	0	0	0	0	0	0	0	0	0.0666667	0	0	0	0	0	0	0	0	0	0
0,-1,2,1,-2,-6	0	0	0	0	0	0	0	0	0	0	0	0	0	0	0	0	0	0	1	0	0
0,-1,2,-1,3,-1	0	0	0	0	0	0	0	0	0	0	1	0	0	0	0	0	0	0	0	0	0
0,1,-2,-1,-3,-2	0	0	0	1	0	0	0	0	0	0	1	0	0	0	0	0	0	0	0	0	0
0,1,2,-1,-3,-4	0	0	0	0	0	0	1	0	0	0	0	0	0	0	0	0	0	0	0	0	0
0,-1,2,-1,-3,-5	0	0	0	0	0	0	0	0	0	0	0	0	0	0	0	0	0	0	0	0	1
0,-1,-2,-1,3,6	0	0	0	0	0	1	0	0	0	0	0	0	0	0	0	0	0	0	0	0	0
0,1,-2,-1,-4,-2	0	0	0	0	0	0	0	0	1	0	0	0	0	0	0	0	0	0	0	0	0
0,-1,2,-1,4,2	0	0	0	0	0	0	0	0	0	0	0	0	0	0	0	0	0	0	1	0	0
0,1,2,1,4,21	0	0	0	0	0	0	0	0	0	0	0	0	0	0	0	0	0	0	0	0	1
0,-1,-2,-1,-4,-5	0	0	0	0	0	0	0	0	0	0	1	0	0	0	0	0	0	0	0	0	0
0,-1,-2,1,4,6	0	0	0	0	0	1	0	0	0	0	0	0	0	1	0	0	0	0	0	0	0
0,-1,-2,-1,-4,-7	0	0	0	1	0	0	0	0	0	0	0	0	0	0	0	0	0	0	0	0	0
0,-1,2,-1,-5,0	0	0	0	1	0	0	0	0	0	0	0	0	0	0	0	0	0	0	0	0	0
0,1,2,-1,-5,-8	0	0	0	0	0	1	0	0	0	1	0	0	0	1	0	0	0	0	0	0	0
0,-1,2,-1,-5,-8	0	0	1	0	0	0	0	0	0	0	0	0	0	0	0	0	0	0	0	0	0
0,-1,-2,-1,-5,-8	0	1	0	0	0	0	0	0	0	0	0	0	0	0	0	0	0	0	0	0	0
0,1,2,-1,-6,-10	0	0	1	0	0	0	0	0	0	0	0	0	0	0	0	0	0	0	0	0	0
0,-1,-2,1,6,10	0	0	0	0	0	0	0	0	0	0	0	0	0	1	0	0	0	0	0	0	0
0,-1,-2,-1,-6,-11	0	1	0	0	0	0	0	0	0	0	0	0	0	0	0	0	0	0	0	0	0
0,-1,2,-1,-6,-6	0	0	0	0	0	0	0	0	0	0	0	0	0	0	0	0	0	1	0	0	0
0,-1,-2,-1,7,-1	0	0	0	0	0	0	0	0	0	0	1	0	0	0	0	0	0	0	0	0	0
0,1,-2,-1,-9,-7	0	0	0	0	0	0	0	0	1	0	0	0	0	0	0	0	0	0	0	0	0
0,-1,-2,-1,9,9	0	0	0	0	0	0	0	0	0	0	1	0	0	0	0	0	0	0	0	0	0
0,-1,-2,10,10,11	0	0	0	0	0	0	0	0	0	0	1	0	0	0	0	0	0	0	0	0	0
0,1,-2,10,15,14	1	0	0	0	0	0	0	0	0	0	0	0	0	0	0	0	0	0	0	0	0
0,-1,-2,-10,-3,-4	0	0	0	0	0	0	1	0	0	0	0	0	0	0	0	0	0	0	0	0	0
0,1,2,10,5,8	0	0	0	0	1	0	0	0	0	0	0	0	0	0	0	0	0	0	0	0	0
0,-1,-2,10,6,3	0	0	0	0	1	0	0	0	0	0	0	0	0	0	0	0	0	0	0	0	0
0,-1,-2,-10,-7,-3	0	0	0	0	0	1	0	0	0	0	0	0	0	0	0	0	0	0	0	0	0
0,-1,-2,-10,-7,-4	0	0	0	1	0	0	0	0	0	0	0	0	0	0	0	0	0	0	0	0	0
0,-1,-2,10,9,8	0	0	0	0	0	1	0	0	0	0	0	0	0	0	0	0	0	0	0	0	0
0,-1,2,12,14,-10	0	0	0	0	0	0	0	0	0	0	0	0	0	0	0	0	0	1	0	0	0
0,-1,-2,12,8,4	0	0	0	0	1	0	0	0	0	0	0	0	0	0	0	0	0	0	0	0	0
0,1,2,12,9,10	1	0	0	0	0	0	0	0	0	0	0	0	0	0	0	0	0	0	0	0	0
0,1,2,14,12,9	0	0	0	0	0	0	1	0	0	0	0	0	0	0	0	0	0	0	0	0	0
0,-1,2,19,18,19	0	0	0	0	0	0	0	0	0	0	0	0	0	0	0	0	0	0	0	0	1
0,1,2,2,0,-1	0	0	0	0	0	0	0	0	0	0	0	0	0	1	0	0	0	0	0	0	0
0,-1,2,2,0,-1	0	0	0	0	0	0	1	0	0	0	0	0	0	0	0	0	0	0	0	0	0
0,-1,-2,2,0,-1	0	0	0	0	0	0	0	0	1	0	0	0	0	1	0	0	0	0	0	0	0
0,-1,2,2,0,2	0	1	0	0	0	0	0	0	0	0	0	0	0	0	0	0	0	0	0	0	0
0,-1,2,2,0,5	0	0	0	0	0	0	0	0	0	0	0	0	0	0	0	0	0	1	0	0	0
0,1,2,2,1,0	0	0	0	0	0	0	0	0	0	0	0	0	0	0.25	0	0	0	0	0	0	0
0,1,2,-2,-1,0	0	0	0	0	0	0	0	0	0	0	0	0	1	0	0	0	0	0	0	0	0
0,-1,-2,2,1,0	0	0	0	0	0	0	0	0	1	0	0	0	0	0	0	0	0	0	0	0	0
0,1,2,2,1,2	0	0	0	0	0	0	0	0	0	0	0	0	0	0.75	0	0	0	0	0	0	0
0,-1,-2,-2,1,-2	1	0	0	0	0	0	0	0	0	0	0	0	0	0	0	0	0	0	0	0	0
0,-1,-2,-2,-1,3	0	0	0	0	0	0	1	0	0	0	0	0	0	0	0	0	0	0	0	0	0
0,-1,-2,-2,-1,-3	0	0	1	0	0	0	0	0	0	0	0	0	0	0	0	0	0	0	0	0	0
0,1,2,2,-1,-4	0	0	0	0	0	0	0	0	0	0	0	0	0	1	0	0	0	0	0	0	0
0,1,2,-2,10,13	0	0	0	1	0	0	0	0	0	0	0	0	0	0	0	0	0	0	0	0	0
0,-1,-2,2,10,5	0	0	0	0	0	0	1	0	0	0	0	0	0	0	0	0	0	0	0	0	0
0,1,2,2,2,0	0	1	0	0	0	0	0	0	0	0	0	0	0	0	0	0	0	0	0	0	0
0,-1,2,2,2,0	0	0	0	0	0	0	0	0	0	0	0	0	0	0	0	0	1	0	0	0	0
0,-1,-2,-2,-2,-1	0	0	0	0	0	0	0	0	1	0	1	0	0	0	0	0	0	0	0	0	0
0,-1,-2,2,2,-2	1	0	0	0	0	0	0	0	0	0	0	0	0	0	0	0	0	0	0	0	0
0,-1,-2,-2,-2,-2	0	0	0	0	0	0	0	0	0	0	0	0	1	0	0	0	0	0	0	0	0
0,-1,2,2,2,4	0	0	0	0	0	0	0	0	0	0	0	0	0	0	0	1	0	0	0	0	0
0,-1,2,2,2,-4	0	0	0	0	0	0	0	0	0	0	0	0	0	0	0	0	0	0	0	0	1
0,-1,-2,2,-3,0	0	0	0	0	0	0	0	0	0	0.5	0	0	0	0	0	0	0	0	0	0	0
0,1,2,2,3,-1	0	0	0	0	0	0	0	0	0	0	0	0	1	0	0	0	0	0	0	0	0
0,-1,-2,2,-3,2	0	0	0	0	0	0	0	0	0	0.5	0	0	0	0	0	0	0	0	0	0	0
0,-1,-2,2,-3,-4	0	0	0	0	0	1	1	0	0	0	0	0	0	0	0	0	0	0	0	0	0
0,-1,-2,2,-3,-5	0	0	0	0	0	0	0	0	0	0	1	0	0	0	0	0	0	0	0	0	0
0,1,2,-2,-4,-2	0	0	0	0	0	0	0	0	0	0	0	0	0	0	1	0	0	0	0	0	0
0,-1,-2,-2,-4,-7	0	0	0	0	0	0	0	0	0	0	1	0	0	0	0	0	0	0	0	0	0
0,1,2,-2,-5,1	0	0	0	0	0	0	0	0	0	0	0	0	1	0	0	0	0	0	0	0	0
0,1,2,-2,-5,-10	0	0	0.5	0	0	0	0	0	0	0	0	0	0	0	0	0	0	0	0	0	0
0,-1,-2,2,5,2	0	0	0	0	0	1	0	0	0	0	0	0	0	0	0	0	0	0	0	0	0
0,-1,-2,2,5,4	0	0	0	0	0	0	0	0	1	0	0	0	0	0	0	0	0	0	0	0	0
0,-1,-2,-2,-5,-4	1	0	0	0	0	0	0	0	0	0	0	0	0	0	0	0	0	0	0	0	0
0,1,2,-2,-5,-7	0	0	0.5	0	0	0	0	0	0	0	0	0	0	0	0	0	0	0	0	0	0
0,-1,-2,2,5,9	0	0	0	1	0	0	0	0	0	0	0	0	0	0	0	0	0	0	0	0	0
0,1,2,-2,-7,-3	0	0	0	0	0	1	0	0	0	0	0	0	0	0	0	0	0	0	0	0	0
0,1,2,2,-7,-5	0	0	0	1	0	0	0	0	0	0	0	0	0	0	0	0	0	0	0	0	0
0,1,-2,24,25,24	0	0	0	0	0	0	0	0	0	0	0	0	0	0	1	0	0	0	0	0	0
0,-1,-2,-3,0,0	0	1	0	0	0	0	0	0	0	0	0	0	0	0	0	0	0	0	0	0	0
0,-1,-2,-3,0,-1	0	0	0	0	0	0.25	0	0	1	0	0	0	0	0	0	0	0	0	0	0	0
0,1,2,3,0,-2	0	0	0	0	0	0	1	0	0	0	0	0	0	0	0	0	0	0	0	0	0
0,-1,-2,3,0,-2	1	0	0	0	0	0	0	0	0	0	0	0	0	0	0	0	0	0	0	0	0
0,-1,-2,-3,0,-2	0	0	0	0	0	0.25	1	0	0	0	0	0	0	0	0	0	0	0	0	0	0
0,-1,-2,-3,0,3	0	0	0	0	0	0.25	0	0	0	0	0	0	0	0	0	0	0	0	0	0	0
0,-1,-2,-3,0,-3	0	0	0	0	0	0.25	0	0	0	0	0	0	0	0	0	0	0	0	0	0	0
0,1,2,3,0,-4	0	0	0	0	0	1	0	0	0	0	0	0	0	1	0	0	0	0	0	0	0
0,-1,-2,3,0,-4	0	0	0	0	0	1	0	0	0	0	0	0	0	0	0	0	0	0	0	0	0
0,-1,-2,-3,0,5	0	0	0	0	0	0	0	0	0	0	0	0	0	1	0	0	0	0	0	0	0
0,1,2,-3,-1,0	0	0	0	0	0	0	0	0	0	0	1	0	0	0	0	0	0	0	0	0	0
0,-1,-2,-3,1,0	0	0	0	0	0	0	0	0	0.2	0	0	0	0	0	0	0	0	0	0	0	0
0,-1,-2,-3,1,1	1	0	0	0	0	0	0	0	0	0	0	0	0	0	0	0	0	0	0	0	0
0,-1,-2,-3,1,-1	0	0	0	0	0	0	0	0	0.8	0	0	0	0	0	0	0	0	0	0	0	0
0,1,2,3,-1,11	0	0	0	1	0	0	0	0	0	0	0	0	0	0	0	0	0	0	0	0	0
0,1,-2,3,1,3	0	0	0	0	0	0	0	0	0	0	0	0	0	0	0	0	0	0	1	0	0
0,-1,-2,-3,-1,-3	0	0	0	0	0	0.5	0	0	0	0	0	0	0	0	0	0	0	0	0	0	0
0,-1,-2,-3,1,4	0	0	0	0	0	0.333333	0	0	0	0	0	0	0	0	0	0	0	0	0	0	0
0,-1,-2,-3,1,-4	0	0	0	0	0	0.666667	0	0	0	1	1	0	0	0	0	0	0	0	0	0	0
0,1,2,3,1,6	0	0	0	0	0	0	0	0	0	0	1	0	0	0	0	0	0	0	0	0	0
0,-1,2,-3,-1,-6	0	0	0	0	0	0	0	0	0	1	0	0	0	0	0	0	0	0	0	0	0
0,-1,-2,-3,-1,-7	0	0	0	0	0	0	0	0	0	0	0	0	1	0	0	0	0	0	0	0	0
0,-1,-2,-3,-1,-8	0	0	0	0	0	0.5	0	0	0	0	0	0	0	0	0	0	0	0	0	0	0
0,-1,-2,-3,1,9	0	0	0	0	0	0	1	0	0	0	0	0	0	0	0	0	0	0	0	0	0
0,-1,2,3,10,10	0	0	0	0	0	0	0	0	0	0	0	0	0	0	0	1	0	0	0	0	0
0,-1,2,-3,-10,-6	0	0	0	0	0	0	0	0	0	0	0	1	0	0	0	0	0	0	0	0	0
0,-1,-2,-3,-11,-4	0	0	0	0	0	0	1	0	0	0	0	0	0	0	0	0	0	0	0	0	0
0,1,2,3,11,6	0	0	0	0	1	0	0	0	0	0	0	0	0	0	0	0	0	0	0	0	0
0,-1,-2,-3,-11,-8	0	0	0	1	0	1	0	0	0	0	0	0	0	0	0	0	0	0	0	0	0
0,1,-2,3,2,0	0	0	0	0	0	0	0	0	0	0	0	0	0	0	0	0	1	0	0	0	0
0,-1,-2,-3,-2,0	0	0	0	0	0	0	0.5	0	0	0	0	0	0	0	0	0	0	0	0	0	0
0,1,2,3,2,1	1	1	0	0	0	1	0	0	0	0	1	0	0	0	0	0	0	0	0	0	0
0,1,-2,-3,-2,1	0	0	1	0	0	0	0	0	0	0	0	0	0	0	0	0	0	0	0	0	0
0,-1,-2,3,2,1	0	0	0	0	0	0	0	0	1	0	0	0	0	0	0	0	0	0	0	0	0
0,-1,-2,-3,2,1	0	0	0	0	0	0	0	0	1	0	0	0	0	0	0	0	0	0	0	0	0
0,-1,-2,-3,2,-1	0	0	0	0	0	1	0	0	0	0	0	0	0	0	0	0	0	0	0	0	0
0,-1,-2,-3,-2,-1	0	0	0	0	0	0	0	0	0	0	0.6	0	0	0.5	0	0	0	0	0	0	0
0,-1,2,3,2,2	0	0	0	0	0	0	0	0	0	0	1	0	0	0	0	0	0	0	0	0	0
0,-1,-2,-3,-2,2	0	0	0	0	0	1	0	0	0	0	0	0	0	0	0	0	0	0	0	0	0
0,-1,-2,-3,-2,-3	0	0	0	0	0	0	0.5	0	0	0	0	0	0	0.5	0	0	0	0	0	0	0
0,1,-2,-3,-2,-5	1	0	0	0	0	1	0	0	0	0	0	0	0	0	0	0	0	0	0	0	0
0,-1,-2,-3,-2,-5	0	0	0	1	0	0	0	0	0	0	0.2	0	0	0	0	0	0	0	0	0	0
0,-1,-2,-3,-2,6	0	0	0	0	0	0	0	0	0	0	0.2	0	0	0	0	0	0	0	0	0	0
0,-1,-2,-3,-2,-7	0	1	0	0	0	0	0	0	0	0	0	0	0	0	0	0	0	0	0	0	0
0,-1,-2,-3,-3,0	0.5	0	0	0	0	0	0	0	0	0	0	0	0	0	0	0	0	0	0	0	0
0,-1,2,-3,-3,-1	1	0	0	0	0	0	0	0	0	0	0	0	0	0	0	0	0	0	0	0	0
0,1,-2,-3,-3,-2	0	1	0	0	0	0	0	0	0	0	0	0	0	0	0	0	0	0	0	0	0
0,-1,-2,-3,-3,-2	0	0	1	0	0	0	1	0	0	0	0	0	0	0	0	0	0	0	0	0	0
0,-1,-2,-3,-3,-3	0	0	0	0	0	0	0	0	0	0	0.5	0	0	0	0	0	0	0	0	0	0
0,1,-2,-3,-3,-4	0	0	0	0	0	1	0	0	0	0	0	0	0	0	0	0	0	0	0	0	0
0,-1,-2,-3,-3,-5	0	0	0	0	0	0	0	0	0	0	0.5	0	0	0	0	0	0	0	0	0	0
0,1,2,3,-3,-6	0	0	0	0	0	0	0	0	0	0	1	0	0	0	0	0	0	0	0	0	0
0,-1,-2,-3,-3,-6	0.5	0	0	0	0	0	0	0	0	0	0	0	0	0	0	0	0	0	0	0	0
0,1,2,3,4,0	0	0	0	0.25	0	0	0	0	0	0	0	0	0	0	0	0	0	0	0	0	0
0,-1,-2,-3,-4,0	0.333333	0	0	0	0	0.0882353	0	0	0	0.5	0.0769231	0	0	0	0	0	0	0	0	0	0
0,1,2,3,4,1	0	0	0	0	0	0.125	0	0	0	0	0	0	0	1	0	0	0	0	0	0	0
0,-1,-2,-3,-4,-1	0	0	0	0	0	0.117647	0.1	0	0	0	0	0	0	0	0	0	0	0	0	0	0
0,1,2,3,4,12	0	0	0	0	1	0	0	0	0	0	0	0	0	0	0	0	0	0	0	0	0
0,-1,-2,-3,-4,-12	0	0	0	0.333333	0	0.0294118	0.1	0	0	0	0	0	0	0	0	0	0	0	0	0	0
0,1,2,3,4,-2	0	0	0	0	0	0	0	0	0	0	1	0	0	0	0	0	0	0	0	0	0
0,-1,-2,-3,-4,-2	0	0	0	0	0	0.0294118	0	0	0	0	0	0	0	0	0	0	0	0	0	0	0
0,1,2,3,4,3	0	0.125	0	0	0	0.125	0	0	0	0	0	0	0	0	0	0	0	0	0	0	0
0,1,-2,3,4,-3	0	0	0	0	0	0	0	0	0	0	0	0	0	1	0	0	0	0	0	0	0
0,1,-2,-3,-4,-3	0	1	0	0	0	0	0	0	0	0	0	0	0	0	0	0	0	0	0	0	0
0,-1,-2,-3,4,3	0	0	0	0	0	0	0	0	1	0	0	0	0	0	0	0	0	0	0	0	0
0,-1,-2,-3,-4,-3	0	0.0833333	0	0	0	0.0294118	0.1	0	0	0	0.0769231	0	0	0	0	0	0	0	0	0	0
0,-1,-2,-3,4,4	0	0	0	0	0	0	0	0	0	0	0	0	0	0	0	0	1	0	0	0	0
0,-1,-2,-3,-4,-4	0	0	1	0	0	0	0.1	0	0	0	0.0769231	0	0	0	0	0	0	0	0	0	0
0,1,2,3,4,5	0	0.75	0	0.5	0	0.75	0	0	0	0	0	0	1	0	0	0	0	0	0	0	0
0,1,-2,-3,-4,-5	1	0	0	0	0	1	0	0	0	0	0	0	0	0	0	0	0	0	0	0	0
0,-1,-2,-3,-4,-5	0.333333	0.75	0	0.666667	0	0.558824	0.2	0	0	0.5	0.538462	0	0.333333	0	0	0	0	0	0	0	0
0,1,2,3,4,6	1	0	0	0	0	0	0	0	0	0	0	0	0	0	0	0	0	0	0	0	0
0,-1,-2,-3,-4,-6	0	0.166667	0	0	0	0	0	0	0	0	0.153846	0	0.333333	0.5	0	0	0	0	0	0	0
0,-1,-2,-3,-4,-7	0.333333	0	0	0	1	0.0882353	0.4	0	0	0	0.0769231	0	0.333333	0	0	0	0	0	0	0	0
0,1,2,3,4,8	0	0	0	0.25	0	0	0	0	0	0	0	0	0	0	0	0	0	0	0	0	0
0,-1,-2,-3,-4,8	0	0	0	0	0	0.0294118	0	0	0	0	0	0	0	0	0	0	0	0	0	0	0
0,-1,-2,-3,-4,-8	0	0	0	0	0	0	0	0	0	0	0	0	0	0.5	0	0	0	0	0	0	0
0,1,2,3,4,9	0	0.125	0	0	0	0	0	0	0	0	0	0	0	0	0	0	0	0	0	0	0
0,-1,-2,-3,-4,-9	0	0	0	0	0	0.0294118	0	0	0	0	0	0	0	0	0	0	0	0	0	0	0
0,-1,-2,-3,-5,1	0	0	0	0	0	0	0	0	0	0	0	0	0	0.5	0	0	0	0	0	0	0
0,1,2,3,5,-16	0	0	0	0	0	0	0	0	0	0	0	0	0	0	0	0	0	0	0	0	1
0,-1,-2,-3,-5,-18	0	0	0	1	0	0	0	0	0	0	0	0	0	0	0	0	0	0	0	0	0
0,1,-2,-3,-5,-2	0	0	0	1	0	0	0	0	0	0	0	0	0	0	0	0	0	0	0	0	0
0,-1,-2,-3,-5,2	0	0	0	0	0	0	0	0	0	0	0.2	0	0	0	0	0	0	0	0	0	0
0,-1,-2,-3,-5,-2	0	0	0	0	0	0	0	0	0	0	0	0	0	0.5	0	0	0	0	0	0	0
0,-1,2,3,5,3	0	0	0	0	0	0	0.5	0	0	0	0	0	0	0	0	0	0	0	0	0	0
0,-1,-2,-3,-5,-4	0	0.25	0	0	0	0.5	0	0	0	0	0.2	0	0	0	0	0	0	0	0	0	0
0,1,-2,-3,5,6	0	0	0	0	0	0	1	0	0	0	0	0	0	0	0	0	0	0	0	0	0
0,1,-2,-3,-5,-6	0	0	0	0	0	1	0.5	0	0	0	0	0	0	0	0	0	0	0	0	0	0
0,-1,2,-3,-5,-6	1	0	0	0	0	0	0	0	0	0	0	0	0	0	0	0	0	0	0	0	0
0,-1,-2,-3,-5,-6	0	0.75	0	0	0	0.25	1	0	0	0	0.4	0	0.333333	0	0	0	0	0	0	0	0
0,1,2,3,5,7	1	0	0	0	0	0	0	0	0	1	0	0	0	0	0	0	0	0	0	0	0
0,1,-2,-3,-5,-7	1	1	0	0	0	0	0.5	0	0	0	0	0	0	0	0	0	0	0	0	0	0
0,-1,2,3,5,7	0	0	0	0	0	0	0.5	0	0	0	0	0	0	0	0	0	0	0	0	0	0
0,-1,-2,-3,-5,-7	0	0	0	0	0	0	0	0	0	1	0.2	0	0.666667	0	0	0	0	0	0	0	0
0,1,-2,-3,5,8	0	0	0	1	0	0	0	0	0	0	0	0	0	0	0	0	0	0	0	0	0
0,-1,-2,-3,-5,-8	1	0	0	0	0	0.25	0	0	0	0	0	0	0	0	0	0	0	0	0	0	0
0,1,-2,-3,-5,-9	0	0	0	0	0	0	0	0	0	0	1	0	0	0	0	0	0	0	0	0	0
0,-1,-2,-3,-6,-10	0	0	0	0	1	0.4	0.6	0	0	0	1	0	0	0	0	0	0	0	0	0	0
0,1,2,3,6,11	0	0	0	0	1	0	0	0	0	0	0	0	0	0	0	0	0	0	0	0	0
0,-1,-2,-3,-6,-3	0	0	0	0	0	0.2	0	0	0	0	0	0	1	0	0	0	0	0	0	0	0
0,-1,-2,-3,-6,-4	1	0	0	0	0	0.2	0.2	0	0	0	0	0	0	0	0	0	0	0	0	0	0
0,1,2,3,6,5	0	0	0	1	0	0	0	0	0	0	0	0	0	0	0	0	0	0	0	0	0
0,-1,2,-3,-6,-5	0	0	0	0	0	0	0	0	1	0	0	0	0	0	0	0	0	0	0	0	0
0,-1,-2,-3,-6,-5	0	0	0	0	0	0.2	0	0	0	0	0	0	0	0	0	0	0	0	0	0	0
0,1,-2,-3,-6,-7	0	0	0	0	0	0	1	0	0	0	0	0	0	0	0	0	0	0	0	0	0
0,-1,-2,-3,-6,-7	0	0	0	0	0	0	0.2	0	0	0	0	0	0	0	0	0	0	0	0	0	0
0,1,2,3,7,10	0	0	0	1	0	0	0	0	0	0	0	0	0	0	0	0	0	0	0	0	0
0,-1,-2,-3,-7,-11	0	0	0	0	0	1	1	0	0	0	0	0	0	0	0	0	0	0	0	0	0
0,-1,-2,-3,7,3	0	0	0	0	0	1	0	0	0	0	0	0	0	0	0	0	0	0	0	0	0
0,-1,-2,-3,-7,-7	0	0	0	0	0	0	0	0	0	0	0	0	0	1	0	0	0	0	0	0	0
0,-1,-2,3,7,8	0	0	0	0	0	0	1	0	0	0	0	0	0	0	0	0	0	0	0	0	0
0,1,2,3,8,0	0	0	0	0	1	0	0	0	0	0	0	0	0	0	0	0	0	0	0	0	0
0,1,2,3,8,6	0	1	0	0	0	0	0	0	0	0	0	0	0	0	0	0	0	0	0	0	0
0,-1,-2,-3,-8,-7	0	0	0	0	0	1	0	0	0	0	0	0	0	0	0	0	0	0	0	0	0
0,-1,-2,-3,9,8	0	0	0	0	0	1	0	0	0	0	0	0	0	0	0	0	0	0	0	0	0
0,-1,-2,-3,9,9	0	0	0	0	0	0	0	0	0	0	1	0	0	0	0	0	0	0	0	0	0
0,-1,-2,-4,0,-1	0	0	0	0	0	0	0	0	1	0	0	0	0	0	0	0	0	0	0	0	0
0,-1,-2,-4,1,0	0	0	0	0	0	0	0	0	1	0	0	0	0	0	0	0	0	0	0	0	0
0,-1,-2,-4,-1,-6	0	0	0	0	0	0	0	0	0	0	0	0	0	1	0	0	0	0	0	0	0
0,1,2,4,-17,-13	0	0	0	0	0	0	0	0	0	0	0	0	0	0	0	0	0	0	0	0	1
0,-1,-2,-4,-17,-13	0	0	0	1	0	0	0	0	0	0	0	0	0	0	0	0	0	0	0	0	0
0,1,2,4,2,1	0	0	0	1	0	0	0	0	0	0	0	0	0	0	0	0	0	0	0	0	0
0,-1,-2,-4,-2,-4	0	0	0	1	0	0	0	0	0	0	0	0	1	0	0	0	0	0	0	0	0
0,-1,-2,-4,2,-5	0	0	0	0	0	0	0	0	0	0	0	0	0	1	0	0	0	0	0	0	0
0,-1,-2,-4,-3,0	0	0	0	0	0	0.666667	0	0	0	0	0	0	0	0	0	0	0	0	0	0	0
0,-1,-2,-4,3,1	0	0	0	0	0	0	0	0	0	0	1	0	0	0	0	0	0	0	0	0	0
0,-1,-2,4,3,2	0	0	0	0	0	0	0	0	0	0	0	0	0	0	0	0	1	0	0	0	0
0,-1,-2,-4,3,2	0	0	0	0	0	0	0	0	0	0	0	0	0	0	0	0	1	0	0	0	0
0,-1,-2,-4,-3,-2	0	0	0	0	0	0	0	0	0	0	1	0	0	0	0	0	0	0	0	0	0
0,-1,-2,-4,-3,-5	0	0	0	0	0	0	1	0	0	0	0	0	0	0	0	0	0	0	0	0	0
0,1,-2,-4,-3,-6	0	0	0	1	0	0	0	0	0	0	0	0	0	0	0	0	0	0	0	0	0
0,-1,-2,-4,-3,-6	0	1	0	0	0	0	0	0	0	0	0	0	0	0	0	0	0	0	0	0	0
0,-1,-2,-4,-3,8	0	0	0	0	0	0.333333	0	0	0	0	0	0	0	0	0	0	0	0	0	0	0
0,-1,-2,-4,-4,0	1	0	0	0	0	0	0	0	0	0	0	0	0	0	0	0	0	0	0	0	0
0,-1,2,4,4,2	0	0	0	0	0	0	0	0	0	0	0	0	0	0	0	0	0	1	0	0	0
0,-1,-2,-4,-5,-1	0	0	0	0	0	0	0	0	0	0	0.5	0	0	0	0	0	0	0	0	0	0
0,-1,-2,4,5,2	0	0	0	0	0	0	0	0	1	0	0	0	0	0	0	0	0	0	0	0	0
0,-1,-2,-4,-5,-2	0	0.25	0	0	0	0	0	0	0	0	0	0	0	0	0	0	0	0	0	0	0
0,1,-2,-4,-5,-4	0	0	0	0	0	0	1	0	0	0	0	0	0	0	0	0	0	0	0	0	0
0,-1,-2,-4,-5,-4	0	0	0	0	0	0	0.25	0	0	0	0	0	0	0	0	0	0	0	0	0	0
0,-1,-2,-4,-5,5	0	0	0	0	0	0.2	0	0	0	0	0	0	0	0	0	0	0	0	0	0	0
0,-1,-2,-4,-5,-5	0	0	0	0	0	0	0	0	0	0	0	0	0.5	0	0	0	0	0	0	0	0
0,1,2,4,5,6	0	0	0	0	0	0	0	0	0	0	0	0	0	1	0	0	0	0	0	0	0
0,-1,-2,-4,-5,-6	0	0.5	0	0	0	0.4	0	0	0	0	0	0	0	0	0	0	0	0	0	0	0
0,1,2,4,5,7	0	1	0	0	0	0	1	0	0	0	0	0	0	0	0	0	0	0	0	0	0
0,-1,-2,-4,-5,-7	1	0.25	0	0	0	0	0.5	0	0	0	0.5	0	0.5	1	0	0	0	0	0	0	0
0,-1,-2,-4,-5,-8	0	0	0	0	0	0.4	0	0	0	0	0	0	0	0	0	0	0	0	0	0	0
0,-1,-2,-4,-5,-9	0	0	0	0	0	0	0.25	0	0	0	0	0	0	0	0	0	0	0	0	0	0
0,-1,-2,-4,-6,-1	0	0	0	0	0	0	0	0	0	0	0	0	0.5	0	0	0	0	0	0	0	0
0,1,2,4,6,5	0.333333	0	0	0	0	0	0	0	0	1	0	0	0	0	0	0	0	0	0	0	0
0,-1,-2,-4,-6,-5	0	0	0	0	0	0	0	0	0	0	1	0	0	0	0	0	0	0	0	0	0
0,-1,-2,-4,-6,-6	0	1	0	0	0	0	0	0	0	0	0	0	0	0	0	0	0	0	0	0	0
0,1,2,4,6,7	0.666667	1	0	0	0	0	0	0	0	0	1	0	0	0	0	0	0	0	0	0	0
0,1,-2,-4,-6,-7	0	0	0	0	0	0	0	0	1	0	0	0	0	0	0	0	0	0	0	0	0
0,-1,-2,-4,-6,-7	0	0	0	0	0	0	0	0	0	1	0	0	0.5	0	0	0	0	0	0	0	0
0,-1,-2,-4,-6,-8	0	0	0	0	0	0	0	0	0	0	0	0	0	0	0	1	0	0	0	0	0
0,-1,2,4,7,11	0	0	0	0	0	0	0	0	0	0	0	0	1	0	0	0	0	0	0	0	0
0,1,2,-4,-7,-4	0	0	0	0	0	0	0	0	0	0	1	0	0	0	0	0	0	0	0	0	0
0,-1,-2,-4,-7,-5	1	0	0	0	0	0	0	0	0	0	0	0	0	0	0	0	0	0	0	0	0
0,-1,-2,-4,-7,-6	0	0	0	0	0	1	0	0	0	0	0	0	0	0	0	0	0	0	0	0	0
0,-1,-2,-4,-7,-7	0	0	0	0	0	0	0	0	0	0	0	0	0	0	0	1	0	0	0	0	0
0,-1,-2,-4,-7,-8	0	0	0	0	0	0	1	0	0	0	0	0	0	0	0	0	0	0	0	0	0
0,-1,2,4,7,9	0	0	0	0	0	1	0	0	0	0	0	0	0	0	0	0	0	0	0	0	0
0,-1,-2,-4,-8,-10	0	0	0	0	0	0	1	0	0	0	0	0	0	0	0	0	0	0	0	0	0
0,-1,-2,-4,-9,-4	0	0	0	0	0	0	1	0	0	0	0	0	0	0	0	0	0	0	0	0	0
0,1,-2,-5,0,-1	0	0	0	0	0	0	0	0	0	0	0	0	0	0	1	0	0	0	0	0	0
0,-1,2,5,0,-1	0	0	0	0	0	0	1	0	0	0	0	0	0	0	0	0	0	0	0	0	0
0,1,2,5,0,-2	0	0	0	0	0	1	0	0	0	0	0	0	0	0	0	0	0	0	0	0	0
0,-1,2,-5,0,4	0	0	0	0	0	0	0	0	0	0	0	0	0	0	1	0	0	0	0	0	0
0,-1,2,5,0,5	0	0	0	0	0	0	0	0	0	0	0	0	0	0	0	1	0	0	0	0	0
0,1,2,5,10,0	1	0	0	0	0	0	0	0	0	0	0	0	0	0	0	0	0	0	0	0	0
0,1,2,5,10,8	0	0	0	0	1	0	0	0	0	0	0	0	0	0	0	0	0	0	0	0	0
0,-1,-2,-5,10,9	0	0	0	1	0	0	0	0	0	0	0	0	0	0	0	0	0	0	0	0	0
0,1,2,5,12,12	0	0	0	0	0	1	0	0	0	0	0	0	0	0	0	0	0	0	0	0	0
0,1,2,5,2,0	1	0	0	0	0	0	0	0	0	0	0	0	0	0	0	0	0	0	0	0	0
0,-1,-2,-5,-2,0	0	0	0	0	0	0	0	0	0	0	0	0	1	0	0	0	0	0	0	0	0
0,-1,2,-5,2,1	0	0	0	0	0	0	0	0	0	0	0	0	0	0	0	0	0	0	0	0	1
0,1,-2,-5,-2,-10	0	0	1	0	0	0	0	0	0	0	0	0	0	0	0	0	0	0	0	0	0
0,1,2,5,2,-2	0	0	0	0	0	0	0	0	0	0	0	0	0	0	0	0	0	1	0	0	0
0,-1,-2,-5,-2,2	0	0	0	0	0	1	0	0	0	0	0	0	0	0	0	0	0	0	0	0	0
0,1,2,5,2,3	0	0	0	0	0	1	0	0	0	0	0	0	0	0	0	0	0	0	0	0	0
0,1,2,-5,-3,0	1	0	0	0	0	0	0	0	0	0	0	0	0	0	0	0	0	0	0	0	0
0,-1,-2,-5,-3,0	0	0	0	0	0	0	1	0	0	0	0	0	0	0	0	0	0	0	0	0	0
0,-1,2,-5,-3,-1	0	0	0	0	0	0	0	0	0	0	0	0	0	0	1	0	0	0	0	0	0
0,-1,-2,-5,3,-2	0	0	0	0	0	0	0	0	0	0	0	0	0	1	0	0	0	0	0	0	0
0,-1,-2,-5,-3,-2	0.5	0	0	0	0	0	0	0	0	0	0	0	0	0	0	0	0	0	0	0	0
0,1,2,5,3,5	0	0	0	1	0	0	0	0	0	0	0	0	0	0	0	0	0	0	0	0	0
0,-1,-2,-5,-3,-6	0	0	0	0	0	1	0	0	0	0	0	0	0	0	0	0	0	0	0	0	0
0,-1,-2,-5,-3,-7	0.5	0	0	0	0	0	0	0	0	0	0	0	0	0	0	0	0	0	0	0	0
0,1,-2,-5,-4,0	0	0	0	1	0	0	0	0	0	0	0	0	0	0	0	0	0	0	0	0	0
0,-1,2,5,4,0	0	0	0	0	0	0	0	0	0	0	0	0	0	0	0	0	0	0	0	0	1
0,-1,-2,-5,-4,-12	1	0	0	0	0	0	0	0	0	0	0	0	0	0	0	0	0	0	0	0	0
0,1,2,5,4,3	0	0	0	1	0	1	0	0	0	0	0	0	0	0	0	0	0	0	0	0	0
0,-1,-2,5,4,3	0	0	0	0	0	0	0	0	1	0	0	0	0	0	0	0	0	0	0	0	0
0,-1,-2,-5,-4,-3	0	0	0	0	0	1	0	0	0	0	0	0	0	0	0	0	0	0	0	0	0
0,1,2,-5,-4,-5	0	1	0	0	0	0	0	0	0	0	0	0	0	0	0	0	0	0	0	0	0
0,-1,2,5,4,8	0	0	0	1	0	0	0	0	0	0	0	0	0	0	0	0	0	0	0	0	0
0,1,2,5,5,0	0	0	0	0	0	0	0	0	0	0	0.666667	0	0	0	0	0	0	0	0	0	0
0,-1,2,5,5,0	0	0	0	0	0	0	0	0	0	0	1	0	0	0	0	0	0	0	0	0	0
0,1,2,5,5,2	0	0	0	0	0	0	0	0	0	0	0.166667	0	0	0	0	0	0	0	0	0	0
0,-1,-2,5,5,2	0	0	0	0	0	0	0	0	0	0	0	0	0	0	0	0	1	0	0	0	0
0,1,2,5,5,6	0	0	0	0	0	0	0	0	0	0	0.166667	0	0	0	0	0	0	0	0	0	0
0,-1,2,5,6,2	0	0	0	0	0	0	0	0	0	0	0	0	0	0	0	0	1	0	0	0	0
0,1,-2,-5,-6,-3	0	0	0	0	0	0	0	0	0	0	0	0	1	0	0	0	0	0	0	0	0
0,1,2,5,6,5	0	0	0	0	0	1	0	0	0	0	0	0	0	0	0	0	0	0	0	0	0
0,-1,-2,-5,-6,-8	0	0	0	0	0	0	1	0	0	0	0	0	0	0	0	0	0	0	0	0	0
0,1,-2,-5,-7,-6	1	0	0	0	0	0	0	0	0	0	0	0	0	0	0	0	0	0	0	0	0
0,1,2,5,7,7	0	0	0	0	0	0	0	0	0	0	0	0	0	0	0	0	0	0	0	1	0
0,-1,2,5,7,8	0	0	0	0	0	1	0	0	0	0	0	0	0	1	0	0	0	0	0	0	0
0,-1,-2,5,7,9	0	0	0	0	0	0	0	0	0	0	0	0	0	0	0	1	0	0	0	0	0
0,1,2,5,8,11	0	1	0	0	0	0	0	0	0	0	0	0	0	0	0	0	0	0	0	0	0
0,1,2,5,8,5	0	0	0	0	0	0	0	0	0	0	1	0	0	0	0	0	0	0	0	0	0
0,1,2,5,9,10	0	0	0	0	0	0	1	0	0	0	0	0	0	0	0	0	0	0	0	0	0
0,-1,-2,-5,-9,-10	0	0	0	0	0	0	0.2	0	0	0	0	0	0	0	0	0	0	0	0	0	0
0,-1,-2,-5,-9,-11	0	0	0	0	0	0	0.2	0	0	0	0	0	0	0	0	0	0	0	0	0	0
0,1,2,5,9,12	0	0	0	0	0	0	0	0	0	0	1	0	0	0	0	0	0	0	0	0	0
0,-1,-2,-5,9,12	0	0	0	1	0	0	0	0	0	0	0	0	0	0	0	0	0	0	0	0	0
0,-1,-2,-5,-9,-12	0	1	0	1	1	0.5	0.6	0	0	0	1	0	0	0	0	0	0	0	0	0	0
0,-1,-2,-5,-9,-13	1	0	0	0	0	0.5	0	0	0	0	0	0	0	0	0	0	0	0	0	0	0
0,-1,2,5,9,8	0	0	0	0	0	0	1	0	0	0	0	0	0	0	0	0	0	0	0	0	0
0,-1,2,-6,-1,-6	0	0	0	0	0	0	0	0	0	0	0	0	0	1	0	0	0	0	0	0	0
0,-1,-2,-6,-10,-11	0	0	0	0	0	0.5	0	0	0	0	0	0	0	0	0	0	0	0	0	0	0
0,-1,-2,-6,-10,-14	0	0	0	0	0	0.5	1	0	0	0	0	0	0	0	0	0	0	0	0	0	0
0,1,2,6,10,6	0	0	0	0	0	1	0	0	0	0	0	0	0	0	0	0	0	0	0	0	0
0,1,-2,-6,-10,-6	0	0	0	0	0	0	0	0	0	0	0	0	1	0	0	0	0	0	0	0	0
0,-1,2,6,10,9	0	0	0	0	0	0	0	0	0	0	0	0	0	0	0	0	0	0	0	0	1
0,1,2,6,2,-2	0	0	0	0	0	0	0	0	0	0	0	0	0	1	0	0	0	0	0	0	0
0,-1,-2,6,2,-2	0	0	0	0	0	0	0	0	0	0	0	0	0	1	0	0	0	0	0	0	0
0,1,-2,-6,-2,-4	0	0	0	0	0	0	0	0	0	0	0	0	0	0	0	0	0	0	1	0	1
0,1,-2,-6,-4,-1	0	1	0	0	0	0	0	0	0	0	0	0	0	0	0	0	0	0	0	0	0
0,-1,-2,-6,-5,-2	0	0	0	0	0	0	1	0	0	0	0	0	0	0	0	0	0	0	0	0	0
0,1,-2,-6,-5,-8	1	0	0	0	0	0	0	0	0	0	0	0	0	0	0	0	0	0	0	0	0
0,-1,-2,-6,-6,-10	0	0	0	0	0	0	0	0	0	0	0	0	0	1	0	0	0	0	0	0	0
0,-1,-2,6,6,3	0	0	0	1	0	0	0	0	0	0	0	0	0	0	0	0	0	0	0	0	0
0,1,-2,6,7,4	0.5	0	0	0	0	0	0	0	0	0	0	0	0	0	0	0	0	0	0	0	0
0,1,-2,6,7,6	0.5	0	0	0	0	0	0	0	0	0	0	0	0	0	0	0	0	0	0	0	0
0,-1,-2,-6,-7,-9	0	0	0	0	0	0	0	0	0	1	0	0	0	0	0	0	0	0	0	0	0
0,1,-2,-6,-9,0	1	0	0	0	1	0	0	0	0	0	0	0	0	0	0	0	0	0	0	0	0
0,1,-2,-6,-9,-11	0	0	0	0	0	1	0	0	0	1	0	0	0	0	0	0	0	0	0	0	0
0,1,2,6,9,13	0	0	0	1	0	0	0	0	0	0	0	0	0	0	0	0	0	0	0	1	0
0,1,-2,-6,-9,-2	0	0	0	0	0	0	0	0	0	0	0	0	0	1	0	0	0	0	0	0	0
0,-1,2,6,9,6	0	0	0	0	0	0	1	0	0	0	0	0	0	0	0	0	0	0	0	0	0
0,1,2,7,-1,2	0	0	0	0	1	0	0	0	0	0	0	0	0	0	0	0	0	0	0	0	0
0,1,-2,-7,-11,-12	1	0	0	0	0	0	0	0	0	0	0	0	0	0	0	0	0	0	0	0	0
0,1,-2,-7,-11,-14	0	0	0.5	0	0	0	0	0	0	0	0	0	0	0	0	0	0	0	0	0	0
0,1,-2,-7,-11,-7	0	0	0.5	0	0	0	0	0	0	0	0	0	0	0	0	0	0	0	0	0	0
0,-1,2,7,11,7	0	0	0	0	0	0	0	0	0	0	0	0	0	1	0	0	0	0	0	0	0
0,1,2,-7,-2,-7	0	0	0	1	0	0	0	0	0	0	0	0	0	0	0	0	0	0	0	0	0
0,-1,2,7,3,6	0	0	0	0	0	0	0	0	0	1	0	0	0	0	0	0	0	0	0	0	0
0,1,2,7,5,1	0	0	0	1	0	0	0	0	0	0	0	0	0	0	0	0	0	0	0	0	0
0,1,2,7,5,3	0	1	0	0	0	0	0	0	0	0	0	0	0	0	0	0	0	0	0	0	0
0,-1,-2,-7,-6,-2	0	0	0	0	0	1	0	0	0	0	0	0	0	0	0	0	0	0	0	0	0
0,1,2,7,6,5	0	0	0	1	0	0	0	0	0	0	0	0	0	0	0	0	0	0	0	0	0
0,1,2,7,9,10	0	0	0	0	0	0	1	0	0	0	0	0	0	0	0	0	0	0	0	0	0
0,-1,2,7,9,10	0	0	0	0	0	1	0	0	0	0	0	0	0	0	0	0	0	0	0	0	0
0,1,-2,-7,-9,-2	0	0	0	0	0	0	0	0	0	0	0	0	0	0	1	0	0	0	0	0	0
0,-1,-2,8,4,0	0	0	0	0	0	1	0	0	0	0	0	0	0	0	0	0	0	0	0	0	0
0,1,-2,-8,-4,-2	0	0	0	0	0	0	0	0	0	0	0	0	0	0	0	1	0	0	0	0	0
0,-1,2,9,6,7	0	0	0	0	0	1	0	0	0	0	0	0	0	0	0	0	0	0	0	0	0
0,1,20,17,14,13	1	0	0	0	0	0	0	0	0	0	0	0	0	0	0	0	0	0	0	0	0
0,1,23,20,16,13	0	0	1	0	0	0	0	0	0	0	0	0	0	0	0	0	0	0	0	0	0
0,1,-23,-20,-23,-25	0	0	0	0	0	0	0	0	0	0	0	0	0	0	0	0	0	0	0	1	0
0,-1,-26,-24,-19,-17	0	0	0	0	0	0	0	0	0	0	0	0	0	0	0	0	0	0	1	0	0
0,-1,-3,0,0,-1	0	0	0	0	0	0	0	0	0	0	0	1	0	0	0	0	0	0	0	0	0
0,-1,-3,0,0,-4	0	0	0	1	0	0	0	0	0	0	0	0	0	0	0	0	0	0	0	0	0
0,1,3,0,1,2	0	0	0	0	0	0	0	0	1	0	0	0	0	0	0	0	0	0	0	0	0
0,1,3,0,-1,-2	0	0	0	1	0	1	0	0	0	0	0	0	0	0	0	0	0	0	0	0	0
0,1,-3,0,-1,-2	0	0	0	0	0	0	1	0	0	0	0	0	0	1	0	0	0	0	0	0	0
0,1,3,0,1,-3	0	0	0	0	0	0	0	0	0	0	0	0	0	1	0	0	0	0	0	0	0
0,-1,-3,0,-1,-3	0	0	0	0	0	0	0	0	0	0	0.8	0	0	0	0	0	0	0	0	0	1
0,-1,-3,0,-1,-6	0	0	0	0	0	0	0	0	0	0	0.2	0	0	0	0	0	0	0	0	0	0
0,1,3,0,1,-7	1	0	0	0	0	0	0	0	0	0	0	0	0	0	0	0	0	0	0	0	0
0,1,3,0,2,3	0	0	0	0	0	0	0	0	1	0	0	0	0	0	0	0	0	0	0	0	0
0,1,3,0,-2,-3	0	0	0	0	0	1	0	0	0	0	0	0	0	0	0	0	0	0	0	0	0
0,1,-3,0,-2,-3	0	0	0	0	0	0	0	0	0	0	0	0	0	1	0	0	0	0	0	0	0
0,-1,-3,0,-2,-3	0	0	0	0	0	0	0	0	0	0	0	0	1	0	0	0	0	0	0	0	0
0,1,3,0,-3,-4	0	0	0	0	0	0	0	0	0	1	0	0	0	0	0	0	0	0	0	0	0
0,1,3,0,-4,-2	0	0	0	0	0	0	0	0	0	0	0	0	0	0	0	1	0	0	0	0	0
0,-1,-3,0,-4,-5	0	0	0	1	0	0	0	0	0	0	0	0	0	0	0	0	0	0	0	0	0
0,1,3,0,-4,-6	0	0	0	0	0	0	0	0	0	0	1	0	0	0	0	0	0	0	0	0	0
0,1,3,0,-4,-7	0	0	1	0	0	0	0	0	0	1	0	0	0	0	0	0	0	0	0	0	0
0,-1,-3,0,-5,0	0	0	0	0	0	0	0	0	0	0	0	0	1	0	0	0	0	0	0	0	0
0,-1,-3,0,-5,-2	0	0	0	0	0	0	0	0	0	0	0	0	0	1	0	0	0	0	0	0	0
0,-1,3,0,-5,-9	0	0	0	0	0	0	0	0	0	0	0	0	0	1	0	0	0	0	0	0	0
0,1,3,0,7,0	0	0	0	0	0	0	0	0	0	0	0	0	0	0	0	0	0	0	1	0	0
0,1,3,1,0,-1	0	0	0	0	0	1	0	0	0	0	0	0	0	0	0	0	0	0	0	0	0
0,-1,3,1,0,-1	0	0	0	0	0	0	0	0	1	0	0	0	0	0	0	0	0	0	0	0	0
0,-1,-3,1,0,-1	0	0	0	0	0	0	0	0	1	0	0	0	0	0	0	0	0	0	0	0	0
0,1,3,1,0,-2	1	0.5	0	1	1	0	1	0	0	0	0	0	0	1	0	0	0	0	0	1	0
0,-1,3,1,0,-2	0	0	0	0	0	0	0	0	0	0	0	0	0	1	0	1	0	0	0	0	0
0,-1,-3,-1,0,2	0	1	0	0	0	0	0	0	0	0	0	0	0	0	0	0	0	0	0	0	0
0,1,-3,1,0,-3	0	0	0	0	0	0	0	0	0	0	0	0	0	1	0	0	0	0	0	0	0
0,-1,-3,1,0,-3	0	0	0	0	0	0	0	0	0	0	0	0	0	0	0	0	1	0	0	0	0
0,-1,-3,-1,0,-4	0	0	0	0	0	0	1	0	0	0	0	0	0	0	0	0	0	0	0	0	0
0,1,3,1,0,-5	0	0.5	0	0	0	0	0	0	0	0	0	0	0	0	0	0	0	0	0	0	0
0,-1,-3,-1,-1,0	0	0	0	0	0	0	0	0	0	0	1	0	0	0	0	0	0	0	0	0	0
0,1,3,1,1,-1	0	0	0	0	0	0	0	0	0	0	0	0	0	0	0	0	0	1	0	0	0
0,-1,-3,-1,-1,1	0	0	0	0	0	0	0	0	0	0	0	0	0	0	0	1	0	0	0	0	0
0,-1,-3,1,-1,-2	0	0	0	0	0	0	0	0	0	0	1	0	0	0	0	0	0	0	0	0	0
0,1,3,-1,1,3	0	0	0	0	0	0	0	0	0	0	0	0	0	0	0	1	0	0	0	0	0
0,1,-3,-1,1,4	0	0	0	0	1	0	0	0	0	0	0	0	0	0	0	0	0	0	0	0	0
0,-1,-3,-1,-1,-5	0	0	0	1	0	0	0	0	0	0	0	0	0	0	0	0	0	0	0	0	0
0,-1,-3,-1,2,-1	0	0	0	0	0	0	0	0	0	0	0	0	0	0	0	0	1	0	0	0	0
0,-1,3,1,2,14	0	0	0	0	0	0	0	0	0	0	1	0	0	0	0	0	0	0	0	0	0
0,1,-3,1,2,-2	0	0	0	0	0	0	0	0	0	0	0	0	1	0	0	0	0	0	0	0	0
0,1,3,1,-2,-4	0	0	0	0	0	0	0	0	0	0	0	0	1	0	0	0	0	0	0	0	0
0,1,3,1,3,0	0	0	0.5	0	0	0	0	0	0	0	0	0	0	0	0	0	0	0	0	0	0
0,1,3,1,-3,0	0	0	0	0	0	0	0	0	0	0	0	0	0	0	0	1	0	0	0	0	0
0,1,3,1,3,1	0	1	0	0	0	0	0	0	0	0	0	0	0	0	0	0	0	0	0	0	0
0,-1,-3,-1,-3,-3	0	0	0	0	0	0	0	0	0.5	0	0	0	0	0	0	0	0	0	0	0	0
0,1,-3,1,3,4	0	0	0	0	0	0	0	0	0	0	0	0	0	0	0	0	0	0	0	0	1
0,-1,-3,-1,-3,-4	0	1	0	1	1	0	0	0	0	0	0	0	0	0	0	0	0	0	0	0	0
0,1,3,1,3,5	0	0	0.5	0	0	0	0	0	0	0	0	0	0	0	0	1	0	0	0	1	1
0,-1,-3,-1,-3,-5	0	0	0	0	0	0	1	0	0.5	0	0	0	0	0	0	0	0	0	0	0	1
0,-1,-3,-1,-3,-6	0	0	0	0	0	0	0	0	0	0	0	0	1	0	0	0	0	0	0	0	0
0,-1,-3,-1,-3,-8	0	0	0	0	0	0	0	0	0	0	0	1	0	0	0	0	0	0	0	0	0
0,1,-3,-1,4,1	0	0	0	0	0	0	0	0	0	0	0	0	0	0	0	0	0	0	0	0	1
0,1,3,1,-4,3	0	0	0	0	0	0	0	0	1	0	0	0	0	0	0	0	0	0	0	0	0
0,1,3,-1,-4,-9	0	1	0	0	0	0	0	0	0	0	0	0	0	0	0	0	0	0	0	0	0
0,1,3,1,5,3	0	0	0	0	0	0	0	0	0	0	0	0	0	0	0	1	0	0	0	0	0
0,1,-3,1,5,-3	0	0	0	0	0	1	0	0	0	0	0	0	0	0	0	0	0	0	0	0	0
0,-1,-3,-1,-5,-8	0	1	0	0	0	0	0	0	0	0	0	0	0	0	0	0	0	0	0	0	0
0,-1,-3,-1,-6,-5	1	0	0	0	0	0	0	0	0	0	0	0	0	0	0	0	0	0	0	0	0
0,-1,3,-1,9,6	0	0	0	0	0	0	0	0	0	0	0	0	0	0	0	0	0	0	0	0	1
0,1,3,10,10,10	0	0	0	0	0	0	0	0	1	0	0	0	0	0	0	0	0	0	0	0	0
0,-1,-3,10,7,3	0	0	0	0	1	0	0	0	0	0	0	0	0	0	0	0	0	0	0	0	0
0,-1,-3,10,8,5	0	0	0	0	0	1	0	0	0	0	0	0	0	0	0	0	0	0	0	0	0
0,-1,-3,10,8,7	0	1	0	0	0	0	0	0	0	0	0	0	0	0	0	0	0	0	0	0	0
0,-1,-3,-11,-3,-1	0	0	0	0	0	0	0	0	0	0	0	0	0	0	0	1	0	0	0	0	0
0,-1,3,11,6,9	0	0	0	0	0	0	1	0	0	0	0	0	0	0	0	0	0	0	0	0	0
0,-1,-3,-12,-4,-12	0	0	0	0	0	0	0	0	0	0	0	0	0	0	0	0	1	0	0	0	0
0,1,3,-12,-7,-2	0	1	0	0	0	0	0	0	0	0	0	0	0	0	0	0	0	0	0	0	0
0,-1,-3,-16,-12,-9	0	0	0	1	0	0	0	0	0	0	0	0	0	0	0	0	0	0	0	0	0
0,1,3,-18,-14,-16	0	0	0	0	0	0	0	0	0	0	0	0	0	0	0	0	0	0	0	0	1
0,1,3,2,0,-1	0	0	0	0	0	0	0	0	0	0	1	0	0	0	0	0	0	0	0	0	0
0,1,-3,-2,0,1	1	0	0	1	1	1	0	0	0	0	0	0	0	0	0	0	0	0	0	0	0
0,-1,-3,2,0,-1	0	0	0	0	0	0	0	0	0	0	1	0	0	0	0	0	0	1	0	1	0
0,-1,-3,2,0,-15	0	0.25	0	0	0	0	0	0	0	0	0	0	0	0	0	0	0	0	0	0	0
0,1,3,-2,0,-2	0	0	0	0	0	0	0	0	0	0	1	0	0	0	0	0	0	0	0	0	0
0,-1,-3,2,0,3	0	0.25	0	0	0	0	0	0	0	0	0	0	0	0	0	0	0	0	0	0	0
0,-1,-3,2,0,-3	0	0	0	0	0	0	0	0	0	0	0	0	0	0	0	0	0	0	0	0	1
0,-1,-3,2,0,5	0	0.5	0	0	0	1	0	0	0	0	0	0	0	0	0	0	0	0	0	0	0
0,1,3,2,1,0	0	0	0	0	0	0	0	0	1	0	1	0	0	0	0	0	0	0	0	0	0
0,1,-3,-2,-1,0	0	0	0	0	0	0	0	0	0	0	0	0	1	0	0	0	0	0	0	0	0
0,-1,3,2,1,0	0	0	0	0	0	0	0	0	1	0	0	0	0	0	0	0	0	0	0	0	0
0,-1,-3,2,1,0	0	0	0	0	0	0	0	0	0.5	0	0	0	0	0	0	0	0	0	0	0	0
0,-1,-3,2,1,-1	0	0	0	0	0	0	0	0	0.5	0	0	0	0	0	0	0	0	0	0	0	0
0,-1,3,-2,1,-2	0	0	0	0	0	0	0	0	0	1	0	0	0	0	0	0	0	0	0	0	0
0,-1,-3,-2,-1,2	0	0	0	0	0	0	1	0	0	0	0	0	0	0	0	0	0	0	0	0	0
0,1,3,2,1,-3	0	0	0	0	0	0	0	0	0	1	0	0	0	0	0	0	0	0	0	0	0
0,-1,-3,2,-1,3	0	0	0	0	0	0	0	0	0	0	0	0	0	0	0	0	1	0	0	0	0
0,1,-3,-2,1,4	0	0	0	0	1	0	0	0	0	0	0	0	0	0	0	0	0	0	0	0	0
0,-1,-3,2,-1,-4	0	0	0	0	0	0	0	0	0	0	0	0	0	0	0	0	0	0	0	0	1
0,-1,-3,-2,1,4	0	0	0	0	0	1	0	0	0	0	0	0	0	0	0	0	0	0	0	0	0
0,-1,-3,-2,-1,-6	0	0	0	0	0	0	0	0	0	0	1	0	0	0	0	0	0	0	0	0	0
0,-1,-3,-2,-10,-7	0	0	0	0	0	1	0	0	0	0	0	0	0	0	0	0	0	0	0	0	0
0,1,3,-2,-14,-14	0	0	0	0	0	0	0	0	1	0	0	0	0	0	0	0	0	0	0	0	0
0,1,-3,-2,-2,0	0	0	0	0	1	0	0	0	0	0	0	0	0	0	0	0	0	0	0	0	0
0,-1,-3,2,-2,0	0	0	0	0	0	0	0	0	0	0	0	0	1	0	0	0	0	0	0	0	0
0,-1,-3,-2,2,-2	0	0	0	0	0	0	0	0	0	0	0	0	0	1	0	0	0	0	0	0	0
0,-1,-3,2,-2,-6	0	0	0	0	0	0	0	0	0	0	0	0	0	0	0	0	0	0	0	1	0
0,1,-3,-2,-26,-23	0	0	0	0	0	0	0	0	0	0	0	0	0	0	0	0	0	0	0	1	0
0,-1,-3,2,3,0	0	1	0	0	0	0	0	0	0	0	0	0	0	0	0	0	0	0	0	0	0
0,1,-3,-2,-3,-1	0	0	0	0	0	0	0	0	0	0	0	0	0	0	0	0	0	0	0	1	0
0,-1,3,-2,3,-2	0	0	0	0	0	0	0	0	0	1	0	0	0	0	0	0	0	0	0	0	0
0,-1,-3,2,3,2	0	0	0	0	0	0	0	0	0	0	0	0	0	0	0	1	0	0	0	0	0
0,-1,3,-2,-3,-4	0	0	0	0	0	1	1	0	0	0	0	0	0	0	0	0	0	0	0	0	0
0,-1,-3,-2,-3,-5	0	0	0	0	0	0	0	0	0	0	0	0	1	0	0	0	0	0	0	0	0
0,-1,-3,-2,3,6	0	0	0	0	1	0	0	0	0	0	0	0	0	0	0	0	0	0	0	0	0
0,-1,-3,-2,-3,-7	0	0	0	0	0	0	0	0	0	0	0	0	0	1	0	0	0	0	0	0	0
0,-1,3,-2,-4,1	0	0	0	0	0	0	0	0	0	0	0	0	0	1	0	0	0	0	0	0	0
0,-1,3,-2,-4,-2	0	0	0	0	0	0	0	0	0	0	1	0	0	0	0	0	0	0	0	0	0
0,-1,-3,-2,-4,-5	0	0	0	0	0	1	0	0	0	0	0	0	0	0	0	0	0	0	0	0	0
0,-1,-3,-2,-4,-6	0	0	0	0	0	0	1	0	0	0	0	0	0	0	0	0	0	0	0	0	0
0,1,-3,-2,5,1	0	0	0	1	0	0	0	0	0	0	0	0	0	0	0	0	0	0	0	0	0
0,1,3,-2,-5,-4	0	0	0	0	0	0	0	0	0.5	0	0	0	0	0	0	0	0	0	0	0	0
0,-1,3,2,5,5	0	0	0	0	0	0	0	0	0	0	0	0	0	0	0	0	0	0	0	0	1
0,-1,-3,-2,5,6	0	0	0	0	0	0	1	0	0	0	0	0	0	0	0	0	0	0	0	0	0
0,-1,-3,-2,-5,-6	0	1	0	0	0	0	0	0	0	0	0	0	0	0	0	0	0	0	0	0	0
0,1,3,2,5,9	0	0	0	0	0	0	0	0	0	0	0	0	0	0	0	0	0	0	0	0	1
0,1,3,-2,-5,-9	0	0	0	0	0	0	0	0	0.5	0	0	0	0	0	0	0	0	0	0	0	0
0,1,-3,-2,6,3	1	0	0	0	0	0	0	0	0	0	0	0	0	0	0	0	0	0	0	0	0
0,-1,-3,-2,-6,-5	1	0	0	0	1	0	0	0	0	0	0	0	0	0	0	0	0	0	0	0	0
0,-1,-3,-2,-7,-4	0	0	0	0	0	1	0	0	0	0	0	0	0	0	0	0	0	0	0	0	0
0,1,3,-2,-7,-9	0	0	0	0	0	0	0	0	1	0	0	0	0	0	0	0	0	0	0	0	0
0,-1,-3,2,-8,-5	0	0	0	0	0	0	0	0	0	0	0	0	0	0	0	0	0	1	0	0	0
0,1,3,-2,-9,-19	0	0	0	0	0	0	0	0	1	0	0	0	0	0	0	0	0	0	0	0	0
0,-1,-3,-2,9,7	0	1	0	0	0	1	0	0	0	0	0	0	0	0	0	0	0	0	0	0	0
0,-1,3,3,1,-2	0	0	0	0	0	0	0	0	0	0	0	0	0	0	0	0	0	0	0	0	1
0,-1,3,3,-1,-2	1	0	0	0	0	0	0	0	0	0	0	0	0	0	0	0	0	0	0	0	0
0,-1,-3,-3,-1,-3	0	1	0	0	0	0	0	0	0	0	0	0	0	0	0	0	0	0	0	0	0
0,-1,-3,-3,1,4	1	0	0	0	0	0	0	0	0	0	0	0	0	0	0	0	0	0	0	0	0
0,1,3,-3,-2,0	0	0	0	1	0	0	0	0	0	0	0	0	0	0	0	0	0	0	0	0	0
0,-1,-3,-3,-2,-1	0	0	1	0	0	0	0	0	0	0	0	0	0	0	0	0	0	0	0	0	0
0,1,3,3,-3,-1	0	1	0	0	0	0	0	0	0	0	0	0	0	0	0	0	0	0	0	0	0
0,-1,-3,-3,-3,-3	0	0	0	0	0	0	0	0	0	0	1	0	0	0	0	0	0	0	0	0	0
0,1,3,3,4,1	0	0	0	1	0	0	0	0	0	0	0	0	0	0	0	0	0	0	0	0	0
0,-1,-3,3,4,2	0	0	0	0	0	1	0	0	0	0	0	0	0	0	0	0	0	0	0	0	0
0,-1,-3,3,-4,2	0	0	0	0	0	0	0	0	0	0	0	0	0	1	0	0	0	0	0	0	0
0,1,3,3,4,4	0	0	0	0	0	0	0	0	0	0	1	0	0	0	0	0	0	0	0	0	0
0,1,3,3,4,6	0	0	0	0	0	0	0	0	1	0	0	0	0	0	0	0	0	0	0	0	0
0,1,3,3,-4,-7	0	0	0	0	0	0	0	0	0	0	0	0	0	0	0	0	0	0	0	1	0
0,1,3,3,4,8	0	0	0	0	0	0	0	0	0	0	0	0	0	0	0	1	0	0	0	0	0
0,-1,-3,-3,-5,-6	0	0	0	0	0	0	0	0	0	0	0	0	1	0	0	0	0	0	0	0	0
0,1,3,4,0,1	0	0	0	1	0	0	0	0	0	0	0	0	0	0	0	0	0	0	0	0	0
0,-1,-3,-4,0,-2	0	0	0	0	0	0	0	0	0	0	1	0	0	0	0	0	0	0	0	0	0
0,1,3,4,0,3	0	0	0	0	0	0	0	0	0	0	0	0	0	1	0	0	0	0	0	0	0
0,1,3,4,0,-3	0	0	0	0	0	1	0	0	0	0	0	0	0	0	0	0	0	0	0	0	0
0,1,3,4,1,0	0.25	0	0	1	0	0	0	0	0	0	0	0	0	0	0	0	0	0	0	0	0
0,-1,-3,-4,-1,1	0	0	0	0	0	0.5	0	0	0	0	0	0	0	0	0	0	0	0	0	0	0
0,-1,-3,-4,-1,-1	0	0	0	0	0	0	0.5	0	0	0	0	0	0	0	0	0	0	0	0	0	0
0,-1,-3,4,1,2	1	0	0	0	0	0	0	0	0	0	0	0	0	0	0	0	0	0	0	0	0
0,1,3,4,1,3	0.75	0	0	0	0	0	0	0	0	0	0	0	0	0	0	0	0	0	0	0	0
0,1,3,4,1,-3	0	1	0	0	0	0	0	0	0	0	0	0	0	0	0	0	0	0	0	0	0
0,-1,-3,4,-1,-3	0	0	0	0	0	0	0	0	0	1	0	0	0	0	0	0	0	0	0	0	0
0,-1,-3,-4,-1,3	0	0	0	0	0	0	0.5	0	0	0	0	0	0	0	0	0	0	0	0	0	0
0,-1,-3,-4,-1,-3	0	1	0	0	1	0	0	0	0	0	0	0	0	0	0	0	0	0	0	0	0
0,-1,-3,-4,-1,6	0	0	0	0	0	0.5	0	0	0	0	0	0	0	0	0	0	0	0	0	0	0
0,-1,-3,-4,-1,-6	1	0	0	0	0	0	0	0	0	1	0	0	0	0	0	0	0	0	0	0	0
0,-1,-3,-4,-1,-9	0	0	0	0	0	0	0	0	0	0	0	0	0	1	0	0	0	0	0	0	0
0,1,3,4,10,9	0	0	0	0	0	0	0	0	0	0	1	0	0	0	0	0	0	0	0	0	0
0,1,3,4,12,9	1	0	0	0	0	0	0	0	0	0	0	0	0	0	0	0	0	0	0	0	0
0,1,3,4,-2,-2	1	0	0	0	0	0	0	0	0	0	1	0	0	0	0	0	0	0	0	0	0
0,-1,-3,-4,-2,2	0	0	1	0	0	0	0	0	0	0	0	0	0	0	0	0	0	0	0	0	0
0,-1,-3,4,2,-3	0	0	0	0	0	0	0	0	0	0	1	0	0	0	0	0	0	0	0	0	0
0,1,3,4,2,4	0	0	0	0	0	1	0	0	0	0	0	0	0	0	0	0	0	0	0	0	0
0,-1,-3,-4,-3,0	0.5	0	0	0	0	0	0	0	0	1	0	0	0	0	0	0	0	0	0	0	0
0,1,3,4,3,1	1	0	0	0	0	0.25	0.5	0	0	0	0	0	0	0	0	0	0	0	0	0	0
0,1,3,4,3,-1	0	0	1	0	0	0	0	0	0	0	0	0	0	0	0	0	0	0	0	0	0
0,-1,-3,-4,-3,1	0	0	0	0	0	0	0.5	0	0	0	0	0	0	0	0	0	0	0	0	0	0
0,-1,-3,-4,-3,-1	0.5	0	0	1	0	0	0.5	0	0	0	0	0	0	0	0	0	0	0	0	0	0
0,1,3,4,3,2	0	0	0	0	0	0	0.5	0	0	0	0	0	0	0	0	0	0	0	0	0	0
0,-1,-3,4,3,2	0	0	0	0	0	0	0	0	0	0	0	0	0	0	0	0	1	0	0	0	0
0,1,3,4,3,4	0	0	0	0	0	0.75	0	0	0	0	0	0	0	0	0	0	0	0	0	0	0
0,1,3,4,3,-5	0	1	0	0	0	0	0	0	0	0	0	0	0	0	0	0	0	0	0	0	0
0,-1,-3,-4,-3,9	0	0	0	0	1	0	0	0	0	0	0	0	0	0	0	0	0	0	0	0	0
0,-1,-3,-4,-4,-11	0	0	0	0	0	0	0	0	0	0	0	0	0.5	0	0	0	0	0	0	0	0
0,-1,-3,-4,-4,3	0	0	0	0	0	0	0	0	0	0	0	0	0.5	0	0	0	0	0	0	0	0
0,1,3,4,4,-4	0	0	0	0.5	0	0	0	0	0	0	0	0	0	0	0	0	0	0	0	0	0
0,-1,-3,-4,-4,-4	0	0	0	0	0	0	0	0	0	1	0	0	0	0	0	0	0	0	0	0	0
0,1,3,4,4,5	0	0	0	0.5	0	0	0	0	0	0	0	0	0	0	0	0	0	0	0	0	0
0,-1,-3,-4,-4,-8	0	1	0	0	0	0	0	0	0	0	0	0	0	0	0	0	0	0	0	0	0
0,1,3,4,5,10	0	0	0	0	0	0	1	0	0	0	0	0	0	0	0	0	0	0	0	0	0
0,1,3,4,5,2	0.25	0	0	0	0	0	0	0	0	0	0	0	0	0	0	0	0	0	0	0	0
0,-1,-3,-4,-5,-4	0	0	0	0	0	0	0	0	0	0	0.333333	0	0	0	0	0	0	0	0	0	0
0,1,3,4,5,5	0	0.333333	0	0.333333	0	0	0	0	0	0	0	0	0	0	0	0	0	0	0	0	0
0,1,3,4,5,6	0.25	0	0	0.333333	0	0	0	0	0	0	0	0	0	0	0	0	0	0	0	0	0
0,1,-3,-4,-5,-6	0	0	0	0	0	1	0	0	0	0	0	0	0	0	0	0	0	0	0	0	0
0,-1,-3,-4,5,6	0	0	0	1	0	0	0	0	0	0	0	0	0	0	0	0	0	0	0	0	0
0,-1,-3,-4,-5,-6	1	0.666667	0	0	0	1	0	0	0	1	0.666667	0	0	1	0	0	0	0	0	0	0
0,1,3,4,5,7	0.25	0.666667	0	0	0	0	0	0	0	0	1	0	0	0	0	0	0	0	0	0	0
0,-1,-3,-4,-5,-7	0	0	0	0	0	0	0	0	0	0	0	0	1	0	0	0	0	0	0	0	0
0,1,3,4,5,8	0.25	0	0	0.333333	0	0	0	0	0	0	0	0	0	0	0	0	0	0	0	1	0
0,-1,-3,-4,-5,-8	0	0.333333	0	0	0	0	0	0	0	0	0	0	0	0	0	0	0	0	0	0	0
0,1,3,4,5,9	0	0	0	0	0	0	0	0	0	0	0	0	0	1	0	0	0	0	0	0	0
0,1,3,4,6,0	0	0	0	0.25	0	0	0	0	0	0	0	0	0	0	0	0	0	0	0	0	0
0,-1,-3,-4,-6,0	0	0	0	0	0	1	0	0	0	0	0	0	0	0	0	0	0	0	0	0	0
0,-1,-3,-4,-6,-1	0	0	0	0	0	0	0	0	0	0	0	0	0	0	0	0	0	1	0	0	0
0,-1,-3,-4,-6,-11	0	0	0	0	0	0	0	0	0	0	0.2	0	0	0	0	0	0	0	0	0	0
0,1,3,4,6,2	0	0.0833333	0	0	0	0	0	0	0	0	0	0	0	0	0	0	0	0	0	0	0
0,1,3,4,6,3	0	0	0	0	0	0	0	0	0.333333	0	0	0	0	0	0	0	0	0	0	0	0
0,-1,-3,-4,6,3	0	0	0	0	0	0.333333	0	0	0	0	0	0	0	0	0	0	0	0	0	0	0
0,-1,-3,-4,-6,-3	0	0	0	0	0	0	0	0	0	0	0	0	0.5	0	0	0	0	0	0	0	0
0,1,3,4,6,4	0	0	0	0	1	0	0	0	0	0	0	0	0	0	0	0	0	1	0	0	0
0,-1,-3,-4,6,-4	0	0	0	0	0	0.333333	0	0	0	0	0	0	0	0	0	0	0	0	0	0	0
0,-1,-3,-4,6,5	0	0	0	0	0	0.333333	0	0	0	0	0	0	0	0	0	0	0	0	0	0	0
0,-1,-3,-4,-6,-5	0	0	0	0	0	0	0	0	0	0	0	0	0	0.5	0	0	0	0	0	0	0
0,1,3,4,6,6	0	0	0	0.25	0	0	0	0	0	0	0	0	0	0	0	0	0	0	0	0	0
0,-1,-3,-4,-6,-6	0	0	0	0	0	0	0	0	0	0	0.2	0	0.5	0	0	0	0	0	0	0	0
0,1,3,4,6,7	0.888889	0.583333	0.75	0.5	0	1	0.666667	0	0	0	0	0	0	0	0	0	0	0	0	0	0
0,-1,-3,-4,-6,-7	1	1	0	0	0	0	0.666667	0	0.5	0	0.6	0	0	0.5	0	0	0	0	0	0	0
0,1,3,4,6,8	0.111111	0.25	0.25	0	0	0	0.333333	0	0.666667	1	1	0	0	0	0	0	0	0	0	0	0
0,-1,-3,-4,-6,-8	0	0	0	1	1	0	0.333333	0	0.5	0	0	0	0	0	0	0	0	0	0	0	0
0,1,3,4,6,-9	0	0.0833333	0	0	0	0	0	0	0	0	0	0	0	0	0	0	0	0	0	0	0
0,-1,-3,-4,-7,-10	0	0	0	0	0	0	0.5	0	0	0	0	0	0	0	0	0	0	0	0	0	0
0,-1,3,4,7,3	0	0	0	0	0	0	0	0	0	1	0	0	0	0	0	0	0	0	0	0	0
0,1,3,4,7,4	0	0.5	0	0	0	0	0	0	0	0	0	0	0	0	0	0	0	0	0	0	0
0,1,3,4,7,5	0	0.5	0	0	0	0	0	0	0	0	0	0	0	0	0	0	0	0	0	0	0
0,-1,-3,-4,-7,-8	0	0	0	0	0	1	0.5	0	0	0	1	0	0	0	0	0	0	0	0	0	0
0,-1,-3,-4,-8,-4	0	0	0	0	0	0	1	0	0	0	0	0	0	0	0	0	0	0	0	0	0
0,-1,-3,-4,-8,-6	1	0	0	0	0	0	0	0	0	0	0	0	0	0	0	0	0	0	0	0	0
0,-1,-3,4,9,11	0	0	1	0	0	0	0	0	0	0	0	0	0	0	0	0	0	0	0	0	0
0,-1,-3,-4,-9,-11	0	0	0	0	0	0	1	0	0	0	0	0	0	0	0	0	0	0	0	0	0
0,-1,-3,-4,-9,-6	1	0	0	0	0	0	0	0	0	0	0	0	0	0	0	0	0	0	0	0	0
0,-1,-3,-5,0,0	0	0	0	0	0	0	0	0	0	0	0	0	0	0	0	1	0	0	0	1	0
0,-1,-3,-5,0,-1	0	0	0	0	0	0	0	0	1	0	0	0	0	0	0	0	0	0	0	0	0
0,1,3,5,0,-2	0	0	0	0	0	0	1	0	0	0	0	0	0	0	0	0	0	0	0	0	0
0,-1,-3,-5,0,-2	0	0	0	0	0	0	0	0	0	0	0	0	1	0	0	0	0	0	0	0	0
0,1,3,5,-1,12	0	0	0	0	0	0	0	0	0	0	0	0	0	1	0	0	0	0	0	0	0
0,1,3,5,1,-2	0	0	0	0	0	0	0	0	0	0	0	0	0	0	0	0	0	0	0	0.5	0
0,-1,-3,-5,-1,2	0	0	0	0	0	0	0.5	0	0	0	0	0	0	0	0	0	0	0	0	0	0
0,1,3,5,1,3	0	0	0	0	0	0	0	0	0	0	0	0	0	0	0	0	0	0	0	0.5	0
0,-1,-3,-5,1,4	0	0	0	0	0	0	0	0	1	0	0	0	0	0	0	0	0	0	0	0	0
0,-1,-3,-5,-1,4	0	0	0	0	0	0	0.5	0	0	0	0	0	0	0	0	0	0	0	0	0	0
0,1,3,5,10,13	0	0	0	0	0	0	0	0	0	0	0	0	0	0	0	0	0	0	0	1	0
0,1,3,5,10,5	0	0	1	0	0	0	0	0	0	0	0	0	0	0	0	0	0	0	0	0	0
0,1,3,5,10,8	0	0	0	0	0	0	1	0	0	0	0	0	0	0	0	0	0	0	0	0	0
0,1,3,5,12,12	0	0	0	0	0	0	0	0	1	0	0	0	0	0	0	0	0	0	0	0	0
0,-1,-3,-5,18,19	0	0	0	0	0	0	0	0	0	0	0	0	0	0	0	1	0	0	0	0	0
0,-1,-3,-5,2,0	0	0	0	0	0	0	0	0	1	0	0	0	0	0	0	0	0	0	0	0	0
0,-1,-3,-5,-2,-3	0	0	0	0	0	0	0	0	1	0	0	0	0	0	0	0	0	0	0	0	0
0,1,3,5,3,0	0	0	0	0	0	0	0	0	0	0	0	0	0	0	0	0	0	0	0	1	0
0,1,-3,5,3,0	0	0	0	0	0	0	0	0	0	0	0	0	0	0	0	0	0	0	0	0	1
0,1,3,5,3,1	0	1	0	0	0	0	0	0	0	0	0	0	0	0	1	0	0	0	0	0	0
0,1,3,5,-3,-1	0	0	0	0	0	0	0	0	1	0	0	0	0	0	0	0	0	0	0	0	0
0,-1,-3,-5,-3,-1	0	0	0	0	0	0	0	0	0	1	0	0	0	0	0	0	0	0	0	0	0
0,1,3,5,3,3	0	0	0	0	0	0	0	0	0	0	0	0	0	0	0	0	1	0	0	0	0
0,-1,-3,5,3,4	0	0	0	0	0	1	0	0	0	0	0	0	0	0	0	0	0	0	0	0	0
0,-1,-3,-5,-3,-5	0	1	0	1	1	0	1	0	0	0	0	0	0	0	0	0	0	0	0	0	0
0,1,-3,-5,-3,-6	0	0	0	0	0	0	0	0	0	0	0	0	0	0	1	0	0	0	0	0	0
0,1,3,5,4,3	1	0	0	0	0	0	0	0	0	0	0	0	0	0	0	0	0	0	0	0	0
0,-1,-3,-5,-4,-4	0	0	0	0	0	0	0	0	0	1	0	0	0	0	0	0	0	0	0	0	0
0,1,3,5,-4,-5	0	0	0	0	0	0	0	0	0	0	0	0	0	0	1	0	0	0	0	0	0
0,1,3,5,4,7	0	0	0	0	0	0	0	0	0	1	0	0	0	0	0	0	0	0	0	0	0
0,-1,-3,-5,-4,7	0	1	0	0	0	0	0	0	0	0	0	0	0	0	0	0	0	0	0	0	0
0,-1,-3,-5,-4,-7	0	0	0	0	0	0	0	0	0	0	1	0	0	0	0	0	0	0	0	0	0
0,-1,-3,-5,-5,-2	0	1	0	0	0	0	0	0	0	0	0	0	0	0	0	0	0	0	0	0	0
0,1,3,5,5,6	0	0	0	0	0	0	0	0	0	0	0	0	0	0	0	1	0	0	0	0	0
0,1,3,5,5,8	0	0	0	0	0	0	0	0	0	0	0	0	0	0	0	0	0	0	0	0	1
0,1,3,5,6,3	0	0	0	0	0	0	0	0	0.25	0	0	0	0	0	0	0	0	0	0	0	0
0,-1,-3,-5,-6,-3	1	0	0	0	0	0	1	0	0	0	0	0	0	0	0	0	0	0	0	0	0
0,1,3,5,6,4	0.2	0	0	0	0	0	0	0	0	0	0	0	0	0	0	0	0	0	0	0	0
0,1,3,5,6,5	0	0.2	0	0	0	0	0.666667	0	0	0.333333	0.5	0	0	0	0	0	0	0	0	0	0
0,1,3,5,6,6	0	0.2	0	0	0	0	0	0	0	0	0	0	0	0	0	0	0	0	0	0	0
0,-1,-3,-5,-6,-6	0	0	0	0	0	0	0	0	0	0	0	0	0.5	0	0	0	0	0	0	0	0
0,1,3,5,6,7	0.2	0	0	0	0	0	0	0	0	0.166667	0	0	0	0	0	0	0	0	0	0	0
0,-1,-3,-5,6,7	0	0	0	0	0	0	1	0	0	0	0	0	0	0	0	0	0	0	0	0	0
0,-1,-3,-5,-6,-7	0	0	0	0	0	0	0	0	0	0.25	0	0	0	0	0	1	0	0	0	0	0
0,1,3,5,6,8	0.6	0.6	1	0	0	0	0.333333	0	0.75	0.5	0.5	0	1	1	0	0	0	0	0	0	0
0,-1,-3,-5,-6,-8	0	1	1	0	1	0	0	0	1	0.75	0	0	0.5	0	0	0	0	0	0	1	0
0,-1,-3,-5,-6,-9	0	0	0	0	0	0	0	0	0	0	1	0	0	0	0	0	0	0	0	0	0
0,1,3,5,7,1	0	0	0	0	0	0	0	0	0.166667	0	0	0	0	0	0	0	0	0	0	0	0
0,1,3,5,7,12	0	0	0	0	0	0	0	0	0	0	0	0	0	0	0	0	0	0	0	0.5	0
0,-1,-3,-5,7,2	0	0	0	0	0	0	0	0	0	0	0	0	0	1	0	0	0	0	0	0	0
0,1,3,5,7,6	0	0	0	0	0	0	0	0	0	0	0	0	0	1	0	0	0	0	0	0	0
0,1,3,5,7,8	1	0	1	1	0	0	0	0	0.666667	0.666667	1	0	0	0	0	0	0	0	0	0.5	0
0,-1,-3,-5,-7,-8	0	1	0	0	0	0	0	0	1	0	0	0	0	1	0	0.5	0	0	0	0	0
0,1,3,5,7,9	0	0	0	0	0	0	0	0	0.166667	0.333333	0	0	0	0	0	0	0	0	0	0	0
0,-1,-3,-5,-7,-9	0	0	0	0	0	0	0	0	0	0	0	0	0	0	0	0.5	0	0	0	0	0
0,1,3,5,8,10	0	0	0	0	0	0	0.5	0	0	0	0	0	0	0	0	0	0	0	0	0	0
0,-1,-3,-5,-8,-10	0	0	0	0	1	0	0	0	0	0	0	0	0	0	0	0	0	0	0	0	0
0,1,3,5,8,12	0	0	0	0	0	1	0	0	1	0	0	0	0	0	0	1	0	0	0	0	0
0,-1,-3,-5,-8,-3	0	0	0	0	0	0	0	0	0	0	0	0	0	0	0	0	0	0	0	0	1
0,1,3,5,8,5	1	0	0	0	0	0	0	0	0	0	0	0	0.5	0	0	0	0	0	0	0	0
0,1,3,5,8,6	0	0	1	0	0	0	0.5	0	0	0	0	0	0	0	0	0	0	0	0	0	0
0,1,3,5,8,7	0	0	0	0	0	0	0	0	0	0	0	0	0.5	0	0	0	0	0	0	0	0
0,-1,-3,-5,-8,-7	0	0	0	0	0	0	0	0	0	0	0	0	1	0	0	0	0	0	0	0	0
0,1,3,5,-9,5	0	0	0	0	0	0	0	0	0	1	0	0	0	0	0	0	0	0	0	0	0
0,1,-3,-6,0,-1	0	1	0	0	0	0	0	0	0	0	0	0	1	0	0	0	0	0	0	0	0
0,1,3,6,0,3	0	0	0	0	0	0	0	0	0	0	0	0	0	0	0	1	0	0	0	0	0
0,-1,-3,-6,0,4	0	0	0	0	0	0	1	0	0	0	0	0	0	0	0	0	0	0	0	0	0
0,-1,-3,-6,-1,0	0	0	0	0	0	0	0	1	0	0	0	0	0	0	0	0	0	0	0	0	0
0,-1,-3,-6,1,-1	0	1	0	0	0	0	0	0	0	0	0	0	0	0	0	0	0	0	0	0	0
0,1,-3,-6,1,-3	0	0	0	0	0	0	0	0	0	0	0	0	0	0	0	0	1	0	0	0	0
0,1,-3,-6,-1,-3	1	0	0	0	0	0	0	0	0	0	0	0	0	0	0	0	0	0	0	0	0
0,-1,-3,-6,-1,-3	0	0	0	0	0	0	0	0	0	0	0	0	0	0	0	0	0	0	0	1	0
0,1,-3,-6,-10,-11	0	0	0	0	1	0	0	0	0	0	0	0	0	0	0	0	0	0	0	0	0
0,-1,-3,-6,-10,-11	0	0.5	0	0	0	0	0	0	0	0	0	0	0	0	0	0	0	0	0	0	0
0,-1,3,6,10,13	0	0	0	1	0	0	0	0	0	0	0	0	0	0	0	0	0	0	0	0	0
0,-1,-3,-6,-10,-14	0	0.5	0	0	0	0	0	0	0	0	0	0	0	0	0	0	0	0	0	0	0
0,-1,-3,-6,-10,-15	0	0	0	0	0	0	1	0	0	0	0	0	0	0	0	0	0	0	0	0	0
0,1,-3,-6,-11,-1	0	0	0	0	0	0	0	0	0	0	0	0	0.5	0	0	0	0	0	0	0	0
0,-1,-3,-6,-11,-12	1	0	0	0	0	0	0	0	0	0	0	0	0	0	0	0	0	0	0	0	0
0,1,-3,-6,-11,-4	0	0	1	0	0	0	0	0	0	0	0	0	0	0	0	0	0	0	0	0	0
0,1,-3,-6,-11,-7	0	0	0	0	0	0	0	0	0	0	0	0	0.5	0	0	0	0	0	0	0	0
0,-1,-3,-6,-18,-18	0	0	0	0	0	0	0	1	0	0	0	0	0	0	0	0	0	0	0	0	0
0,-1,-3,6,2,-1	0	0	0	0	0	0	0	0	0	0	0	0	0	0	0	0	0	0	0	0	1
0,-1,3,6,3,10	0	0	0	0	0	1	0	0	0	0	0	0	0	0	0	0	0	0	0	0	0
0,-1,-3,-6,-3,2	0	0	0	0	0	0	0	0	0	0	0	1	0	0	0	0	0	0	0	0	0
0,-1,-3,-6,-3,-5	0	0	0	0	0	0	1	0	0	0	0	0	0	0	0	0	0	0	0	0	1
0,-1,-3,-6,-3,-8	0	0	0	0	0	0	0	0	0	0	0	0	0	0	0	0	1	0	0	0	0
0,-1,-3,-6,-4,-7	1	0	0	0	0	0	0	0	0	0	0	0	0	0	0	0	0	0	0	0	0
0,1,-3,-6,4,-9	0	0	0	0	0	1	0	0	0	0	0	0	0	0	0	0	0	0	0	0	0
0,-1,3,6,5,1	0	0	0	0	0	0	0	0	1	0	0	0	0	0	0	0	0	0	0	0	0
0,-1,-3,-6,-5,-4	0	0	0	0	0	1	0	0	0	0	1	0	0	0	0	0	0	0	0	0	0
0,-1,-3,-6,-5,-8	0	0	0	0	0	0	0	1	0	0	0	0	0	0	0	0	0	0	0	0	0
0,-1,-3,-6,-5,-9	0	0	0	0	0	0	0	0	0	0	0	0	0	0	0	0	0	0	0	1	0
0,1,3,6,6,1	0	0	0	0	0	0	0	0	0	0	1	0	0	0	0	0	0	0	0	0	0
0,-1,-3,-6,6,-10	0	0	0	0	0	0	0	0	0	0	0	1	0	0	0	0	0	0	0	0	0
0,-1,-3,-6,-6,-8	0	0	0	0	0	0	0	0	0	0	0	0	0	0	0	1	0	0	0	0	0
0,-1,-3,-6,-7,-4	0	0	0	0	0	0	1	0	0	0	0	0	0	0	0	0	0	0	0	0	0
0,1,3,6,7,6	0	0	0	0	0	0	0	0	0	0	0	0	0	1	0	0	0	0	0	0	0
0,1,-3,-6,-8,-1	0	0	0	0	0	1	0	0	0	0	0	0	0	0	0	0	0	0	0	0	0
0,1,-3,-6,-8,-11	0	0	1	0	0	0	0	0	0	0	0	0	0	0	0	0	0	0	0	0	0
0,-1,-3,-6,-8,-11	0	0	0	0	0	0	0	1	0	0	0	0	0	0	0	0	0	0	0	0	0
0,-1,3,6,8,9	0	0	0	1	0	0	0	0	0	0	0	0	0	0	0	0	0	0	0	0	0
0,1,-3,-6,-9,0	0	0	0	0	0	0	0	0	0	0	0	0	0	1	0	0	0	0	0	0	0
0,1,-3,-6,-9,-1	1	0	0	0	0	0	0	0	0	0	0	0	0	0	0	0	0	0	0	0	0
0,1,-3,-6,-9,-6	0	0	0	0	0	0	0	0	0	0	0	0	0	0	1	0	0	0	0	0	0
0,-1,-3,-7,0,-1	0	0	0	0	0	0	0	0	0	0	0	0	0	1	0	0	0	0	0	0	0
0,1,-3,-7,0,-2	0	0	0	1	0	0	0	0	0	0	0	0	0	0	0	0	0	0	0	0	0
0,1,-3,-7,-11,-6	0	0	0	0	0	0	0	0	0	0	0	0	1	0	0	0	0	0	0	0	0
0,-1,3,7,12,15	0	0	0	0	0	0	0	0	0	0	0	0	0	0	0	0	0	0	0	1	0
0,-1,-3,-7,2,-2	0	0	0	0	0	0	0	0	0	0	0	0	0	0	0	0	0	0	0	0	1
0,-1,-3,7,4,2	0	1	0	0	0	0	0	0	0	0	0	0	0	0	0	0	0	0	0	0	0
0,-1,-3,7,5,4	0	1	0	0	0	0	0	0	0	0	0	0	0	0	0	0	0	0	0	0	0
0,-1,-3,7,6,5	0	0	0	0	0	1	0	0	0	0	0	0	0	0	0	0	0	0	0	0	0
0,-1,-3,-7,-8,-10	0	0	0	0	0	0	0	0	0	0	1	0	0	0	0	0	0	0	0	1	0
0,-1,-3,-7,-8,-16	0	0	1	0	0	0	0	0	0	0	0	0	0	0	0	0	0	0	0	0	0
0,-1,-3,-7,-8,-4	0	0	0	0	0	0	0	0	0	0	0	0	0	1	0	0	0	0	0	0	0
0,-1,-3,-7,-9,-8	0	0	0	0	0	0	1	0	0	0	0	0	0	0	0	0	0	0	0	0	0
0,1,-3,-8,1,-1	0	0	0	0	0	0	0	0	0	0	0	0	0	0	0	0	0	0	0	0	1
0,-1,-3,-8,-1,-3	1	0	0	0	0	0	0	0	0	0	0	0	0	0	0	0	0	0	0	0	0
0,-1,-3,-8,-10,-12	0	0	1	0	0	0	0	0	0	0	0	0	0	0	0	0	0	0	0	0	0
0,-1,3,8,10,5	0	0	0	0	0	0	0	0	0	0	0	0	0	1	0	0	0	0	0	0	0
0,-1,-3,-8,-3,-5	0	0	0	0	0	0	1	0	0	0	0	0	0	0	0	0	0	0	0	0	0
0,1,3,8,3,8	0	0	0	0	0	0	0	0	0	0	0	0	0	1	0	0	0	0	0	0	0
0,1,-3,-8,-4,-1	0	0	0	0	0	1	0	0	0	0	0	0	0	0	0	0	0	0	0	0	0
0,-1,-3,-8,-6,-5	0	0	0	0	0	0	0	0	0	0	1	0	0	0	0	0	0	0	0	0	0
0,-1,-3,8,9,11	0	0	0	0	0	0	0	0	0	0	0	0	0	1	0	0	0	0	0	0	0
0,1,3,-8,-9,-12	1	0	0	0	0	0	0	0	0	0	0	0	0	0	0	0	0	0	0	0	0
0,-1,-3,8,9,7	0	0	0	0	1	0	0	0	0	0	0	0	0	0	0	0	0	0	0	0	0
0,1,-3,9,12,10	0	0	0	1	0	0	0	0	0	0	0	0	0	0	0	0	0	0	0	0	0
0,-1,-3,9,9,9	0	0	0	0	0	0	0	0	0	0	0	0	0	1	0	0	0	0	0	0	0
0,-1,-4,0,-1,-4	0	0	0	0	0	0	0	0	0	0	0	0	0	1	0	0	0	0	0	0	0
0,1,4,0,3,1	0	0	0	0	0	0	0	0	0	1	0	0	0	0	0	0	0	0	0	0	0
0,1,4,1,1,0	0	0	0	0	1	0	0	0	0	0	0	0	0	0	0	0	0	0	0	0	0
0,1,4,1,-1,-2	0	0	0	1	0	0	0	0	0	0	0	0	0	0	0	0	0	0	0	0	0
0,1,4,1,-1,-3	1	0	0	0	0	0	0	0	0	0	0	0	0	0	0	0	0	0	0	0	0
0,-1,4,1,-1,-3	1	0	0	0	0	0	0	0	0	0	0	0	0	0	0	0	0	0	0	0	0
0,-1,-4,-1,1,4	0	0	0	0	0	0	0	0	0	0	0	0	1	0	0	0	0	0	0	0	0
[truncated: 6,424 more rows]
